# Supplementary material for: ATOH8 upregulated by IL-6/STAT3 attenuates endoplasmic reticulum stress and promotes oxaliplatin resistance in gastric cancer
Source: Research Square preprint supplement (doi:10.21203/rs.3.rs-5821401/v1), 2025-01-17
Supplement: Supplementary file 1 [file 78d60c2e3d3e2d981e7d6063.xlsx]

## Sheet: Table S1
Supplementary Table 1. Information on qRT-PCR primers used in this study
Gene	Seq（5’-3’）
ATOH8 Forward	CAGGTGCCGTGCTACTCATA
ATOH8 Reverse	AGTCACTCCTTGCGCTTCTT
IRE1 Forward	AGAGAAGCAGCAGACTTTGTC
IRE1 Reverse	GTTTTGGTGTCGTACATGGTGA
ATF6 Forward	GTCCCAGATATTAATCACGGA
ATF6 Reverse	TATCATACGTTGCTGTCTCCTTAGC
PERK Forward	ACGATGAGACAGAGTTGCGAC
PERK Reverse	ATCCAAGGCAGCAATTCTCCC
IL-6 Forward	CTCTGCAAGAGACTTCCATCCAGT
IL-6 Reverse	GAAGTAGGGAAGGCCGTGG

## Sheet: Table S2
Supplementary Table 2. Information on RNA interference sequence and plasmids used in this study.
RNA	Seq（5’-3’）
shATOH8#1	GAAAGTTCCTACTCGTCAATT
shATOH8#2	CCTGAGGATCGCCTGTAACTA

## Sheet: Table S3
Supplementary Table 3. Immune infiltration in TCGA-STAD based on MCP method.
ID	T_cells_MCPcounter	CD8_T_cells_MCPcounter	Cytotoxic_lymphocytes_MCPcounter	B_lineage_MCPcounter	NK_cells_MCPcounter	Monocytic_lineage_MCPcounter	Myeloid_dendritic_cells_MCPcounter	Neutrophils_MCPcounter	Endothelial_cells_MCPcounter	Fibroblasts_MCPcounter
TCGA-D7-5577-01A	6.64933	5.74108	13.0436	474.748	0.682195	27.9155	2.97952	5.10087	6.07951	166.275
TCGA-D7-6818-01A	1.69315	0.207107	0.900745	1642.96	0.235828	42.5792	4.97419	10.8775	18.5246	1225.23
TCGA-BR-7958-01A	12.5323	10.2565	18.9552	3764.42	1.15071	28.6873	10.4666	4.16431	12.1526	483.478
TCGA-D7-8572-01A	5.90087	4.84549	4.69287	2190.38	1.15766	27.8101	4.21553	11.6114	15.6227	1370.81
TCGA-VQ-A91Z-01A	4.93497	4.54087	0.468861	25.7286	0.130462	2.5743	1.42734	11.7858	4.34035	162.19
TCGA-HU-A4HD-01A	1.76076	3.1609	0.674922	523.423	0.180284	8.26136	2.14769	6.12027	7.38632	212.005
TCGA-VQ-A8PQ-01A	37.9264	7.74814	9.00299	962.986	1.36752	23.6033	12.7572	12.9618	20.1841	577.188
TCGA-IN-A6RN-01A	4.82332	0.256767	0.734879	414.124	0.292679	1.78684	25.8015	4.54297	5.14233	141.736
TCGA-BR-8679-01A	1.31367	0.291059	0.849744	248.923	0.286074	17.2472	4.56256	6.81249	14.9028	576.896
TCGA-CG-5726-01A	1.19394	0.292976	0.495192	190.628	0.111617	4.84941	2.90525	4.65732	4.2551	77.1012
TCGA-BR-6453-01A	9.11867	2.66779	3.40922	1835.86	0.352191	14.688	7.65769	3.30617	13.8391	257.942
TCGA-HU-A4GQ-01A	2.26764	0.734222	2.37079	111.639	0.429988	9.74027	3.45078	3.62882	5.79573	411.033
TCGA-VQ-A8PP-01A	5.21799	2.01703	6.59348	615.91	0.633988	12.7158	2.78148	6.00123	7.89339	1087.12
TCGA-HF-7132-01A	11.18	2.38857	6.64616	3058.37	1.08218	26.6722	5.97496	8.48051	12.2104	324.661
TCGA-BR-A4IV-01A	2.36365	0.443918	1.99699	1175.58	0.56792	8.77873	5.00012	5.90772	19.7215	2303.69
TCGA-BR-4371-01A	3.17811	0.672316	2.46556	181.759	0.780357	9.22062	3.68671	7.40003	4.36625	69.1712
TCGA-BR-8296-01A	8.48664	1.77819	3.30323	2243.48	1.28308	11.1056	7.59541	5.6558	13.9254	227.863
TCGA-R5-A7ZR-01A	1.47596	2.221	1.11407	3405.73	0.175707	4.64363	1.86293	4.4946	3.81698	48.7715
TCGA-BR-8680-01A	2.13219	0.46773	0.902962	89.6691	0.583631	6.23563	0.770342	3.4276	5.31393	363.025
TCGA-VQ-A8P2-01A	1.49298	0.222212	1.29912	194.764	0.266736	2.44195	6.83976	4.71124	5.78912	161.478
TCGA-IN-A6RL-01A	12.8217	0.457311	1.31873	1567.68	0.305517	6.20531	7.76187	5.54946	8.71208	86.239
TCGA-CD-A48A-01A	2.00383	0.49187	1.11234	523.339	0.531265	7.62109	1.62655	4.17955	3.3054	105.743
TCGA-VQ-A92D-01A	1.27317	0.272798	0.998575	182.927	0.300646	3.56975	1.06034	5.19921	9.40049	451.5
TCGA-CD-8533-01A	6.46039	0.467239	0.829285	570.791	0.644982	6.80949	2.60065	11.7535	11.6846	305.688
TCGA-HU-A4GT-01A	2.13757	0.798884	1.02487	931.347	0.274844	5.49061	10.6394	5.29267	5.23338	111.951
TCGA-KB-A6F7-01A	8.13125	4.9068	8.35883	2000.5	1.80647	20.8706	8.80092	5.4477	6.48653	60.5227
TCGA-D7-A74A-01A	2.06074	0.732378	1.31274	489.19	0.1784	4.19874	2.3655	3.30912	3.20506	29.7055
TCGA-IN-A7NR-01A	57.4087	1.30665	1.82023	960.569	0.435503	3.98117	7.2791	5.12581	6.72886	88.2964
TCGA-HU-8602-01A	6.91295	0.996628	7.84172	381.148	1.31531	44.0903	3.12544	12.0842	13.2836	463.624
TCGA-BR-6456-01A	5.85071	1.70298	4.12746	622.938	0.486666	26.4803	4.23512	21.2067	30.8385	1324.72
TCGA-CD-8524-01A	3.96643	2.22315	3.79764	2316.78	0.422702	11.7797	2.84217	7.59652	14.4527	562.051
TCGA-VQ-A8PO-01A	7.66596	2.8263	6.72085	1307.99	0.817984	12.8934	6.07415	5.62251	8.62335	532.771
TCGA-BR-7717-01A	1.06051	1.6881	0.94847	462.74	0.164549	3.14142	1.11918	3.26318	9.25199	334.656
TCGA-CG-4475-01A	2.24225	0.185914	1.08	144.587	0.267181	18.5516	6.1863	9.5136	21.5212	626.488
TCGA-HU-A4GP-01A	1.31391	0.545726	0.705722	201.303	0.356776	4.67541	2.32472	3.81327	10.9911	90.0122
TCGA-BR-A4J9-01A	4.09351	0.609524	1.1821	2358.84	0.275785	4.42916	2.88521	4.73407	12.6802	518.561
TCGA-VQ-A91E-01A	5.61577	1.9127	4.91821	2517.76	0.970512	6.26697	50.6824	7.13685	6.21264	97.3655
TCGA-HU-A4GD-01A	3.62412	1.75521	1.75784	112.418	1.6682	3.85955	1.81244	4.15482	4.00479	31.7445
TCGA-CD-5804-01A	3.06977	1.041	2.22097	565.734	0.294543	13.3989	1.86687	5.59006	12.987	535.062
TCGA-D7-A747-01A	5.36379	1.52827	2.76157	158.436	0.658826	9.70895	3.98873	4.36035	6.94657	511.638
TCGA-KB-A93G-01A	3.34023	0.190998	1.69842	179.726	1.07829	19.8797	7.26914	17.9828	35.4195	3995.51
TCGA-RD-A8MV-01A	6.20951	1.87665	6.15745	3893.51	1.75913	16.7231	3.35049	8.55378	8.26023	85.4668
TCGA-BR-4256-01A	6.42452	3.45809	6.58273	1370.02	1.05361	54.1952	6.44167	14.7205	21.2263	824.386
TCGA-FP-7735-01A	2.80986	0.786848	1.75005	1542.73	0.856828	6.70176	1.80731	2.82079	13.0878	169.898
TCGA-VQ-A8PK-01A	2.51612	3.3325	4.65044	991.903	1.63737	7.62215	3.8424	11.0044	7.82252	684.473
TCGA-BR-7707-01A	2.59716	0.935465	6.89061	974.026	1.16981	7.19448	1.6031	6.18824	7.28522	538.751
TCGA-IN-A6RS-01A	4.45064	1.45316	5.9457	731.799	0.171503	6.59221	2.10177	5.8624	12.1626	146.402
TCGA-D7-6520-01A	1.80207	0.320669	0.914095	542.022	0.233267	13.6115	2.1711	5.92437	9.32241	604.345
TCGA-VQ-A91N-01A	2.93169	0.705617	2.35913	927.24	0.771881	5.74248	13.5926	7.65348	8.35986	95.8076
TCGA-CG-4440-01A	1.48985	1.43004	3.72958	39.7834	0.603805	15.2336	2.2645	8.24804	6.28314	227.926
TCGA-BR-8487-01A	2.15218	0.56036	2.45675	1903.71	0.937755	8.09095	1.51339	2.55435	4.07011	204.204
TCGA-VQ-A94U-01A	6.20893	0.330845	0.810156	189.107	0.653293	5.29029	6.42599	6.91051	20.6273	354.711
TCGA-CG-5717-01A	233.696	1.64905	3.3985	364.172	0.568316	12.7141	12.566	11.0905	13.6921	97.1766
TCGA-BR-A4CR-01A	3.40128	0.156155	1.9044	79.8413	0.391095	7.00085	1.72284	14.6898	10.8171	123.506
TCGA-HU-8249-01A	5.57319	1.62523	4.23563	431.418	0.540134	4.7726	1.56725	5.26339	8.67589	182.702
TCGA-BR-6454-01A	9.38175	4.99166	10.6635	4298.43	0.913925	13.1977	11.874	7.14962	9.40627	115.657
TCGA-BR-8295-01A	1.19341	0.389298	1.3705	408.371	0.583405	4.24884	0.895466	4.86046	7.67501	73.8852
TCGA-HU-A4HB-01A	10.5271	2.81713	4.24116	3567.75	0.928378	12.4893	6.14625	5.28632	7.41911	84.7421
TCGA-BR-4280-01A	4.81022	1.16935	4.14433	2125.55	0.479079	14.729	1.94373	5.55828	5.09559	108.579
TCGA-BR-7197-01A	5.46489	0.171625	0.432417	83.6099	0.184265	4.19904	1.20637	4.17832	7.85936	287.937
TCGA-VQ-A94P-01A	4.39493	1.73555	3.35763	659.071	0.636723	12.2704	6.99035	7.07721	33.0653	845.737
TCGA-D7-8575-01A	4.36939	0.881784	2.14398	1501.2	0.70336	28.9727	8.79808	10.4105	9.45426	115.317
TCGA-HU-A4H2-01A	2.36998	0.712164	1.89933	1484.44	0.338529	5.62864	1.52146	3.21618	3.01189	88.2558
TCGA-VQ-A8E0-01A	3.61659	0.0991681	0.892264	149.603	0.444874	10.721	6.87274	8.20554	10.7468	126.833
TCGA-IN-A6RO-01A	2.78947	0.371972	2.14546	353.205	0.660699	4.12037	1.24249	4.22458	6.05542	62.2227
TCGA-BR-4369-01A	7.27601	1.09996	2.01426	3094.6	0.677307	21.456	9.69647	6.08773	6.43593	231.672
TCGA-VQ-AA68-01A	4.91559	1.43655	3.46391	384.28	0.461033	6.4828	4.07326	6.26594	9.59521	102.924
TCGA-BR-8372-01A	6.83801	3.3906	8.91729	513.351	1.13646	23.0391	15.7544	4.09461	5.56064	111.69
TCGA-VQ-A91Y-01A	6.99415	1.46016	4.83381	1410.97	1.03797	26.7864	4.89159	6.40985	14.4203	755.245
TCGA-RD-A8MW-01A	4.31214	3.17199	1.89698	12690.7	0.364748	20.6302	4.59535	3.3531	7.4442	547.141
TCGA-BR-8382-01A	2.5683	0.355537	4.70986	1829.76	1.44855	9.83564	3.7383	6.73143	8.05525	716.491
TCGA-HU-A4GF-01A	3.66631	2.5414	2.39134	341.654	0.454235	10.2991	2.2025	11.2959	14.6413	128.347
TCGA-R5-A7ZI-01A	5.39933	4.36117	5.74937	4120.98	0.73775	11.1504	5.43903	2.15539	3.16963	56.8949
TCGA-BR-8588-01A	4.93353	2.57182	4.6561	537.801	0.636519	13.6278	13.0318	7.12386	11.0846	536.274
TCGA-CD-5801-01A	8.01414	9.47263	13.5164	2707.45	0.83182	13.1248	2.34256	2.98716	4.47849	106.99
TCGA-CD-5800-01A	2.706	3.42904	1.28921	269.42	0.313167	7.10375	5.60325	9.50843	8.4487	276.904
TCGA-CG-4462-01A	3.28606	0.593972	2.04914	901.869	0.49807	66.6996	11.587	34.596	27.506	1358.84
TCGA-CD-8530-01A	3.13226	1.08808	2.3947	301.278	0.744949	10.9847	5.54388	6.73299	30.2607	470.52
TCGA-VQ-A8PX-01A	8.0888	1.18903	2.03439	2264.52	0.2353	4.73073	7.08783	10.1727	7.49993	53.9776
TCGA-D7-8578-01A	2.91817	2.12014	2.10581	602.601	0.416162	11.1267	2.16851	6.45438	10.4718	1482.27
TCGA-BR-6458-01A	7.52785	2.49467	7.23755	826.338	0.844994	38.6978	4.2397	7.29768	15.3028	1076.82
TCGA-VQ-A8PB-01A	2.11226	0.927692	4.40025	1118.78	0.342621	6.07106	3.56587	4.23209	8.5233	389.993
TCGA-D7-6822-01A	3.99082	25.0507	4.69039	62.1994	0.505339	13.5143	6.42867	13.1152	10.3875	350.151
TCGA-BR-8284-01A	10.6198	7.3618	16.2583	1725.78	0.906814	27.7873	6.79427	6.4331	15.7308	439.127
TCGA-3M-AB47-01A	3.33984	0.546186	1.95493	1830.27	1.14053	5.02646	3.95835	4.98947	17.2442	434.124
TCGA-CD-A4MG-01A	1.56797	0.262362	1.47562	505.489	0.236362	9.65774	31.4332	2.72042	5.90243	651.129
TCGA-BR-4191-01A	6.55418	2.30555	7.3121	2686.35	1.04053	47.5468	23.4382	6.91402	16.4771	211.022
TCGA-BR-8366-01A	10.6734	7.62697	13.6357	6427.23	2.59245	36.0529	5.46959	5.25888	11.1605	431.361
TCGA-CD-A486-01A	2.07488	0.612343	0.768355	3301.66	0.131708	12.8213	3.67046	7.11907	6.35377	460.394
TCGA-BR-8077-01A	4.82028	13.1877	3.6369	961.182	0.583707	12.294	5.32679	4.79789	9.64516	129.326
TCGA-R5-A7O7-01A	3.30203	0.391419	1.04431	1026.4	0.396551	2.93429	1.85612	3.60917	9.33697	103.737
TCGA-VQ-A8DZ-01A	1.78613	8.9537	1.58456	784.415	0.280673	8.16005	2.2165	11.9705	12.8378	167.175
TCGA-BR-A44T-01A	11.729	2.695	5.54102	554.783	1.19754	7.00968	7.28433	3.80348	7.08844	234.121
TCGA-HU-A4H6-01A	2.97256	0.615206	1.3475	2713.51	0.477366	4.6406	2.17062	5.21463	9.78278	75.2644
TCGA-ZA-A8F6-01A	3.10151	0.483293	1.45605	282.592	0.540951	24.8593	4.84672	7.05726	13.925	399.946
TCGA-BR-A4CS-01A	1.35745	0.171017	0.875769	150.523	0.127328	5.20603	5.85761	4.6956	7.85143	242.95
TCGA-R5-A7ZE-01B	45.2191	1.65784	0.369159	19.1619	0.224736	3.24089	17.473	6.40879	7.8389	72.607
TCGA-RD-A7BW-01A	9.76554	7.75397	11.5418	153.155	0.818956	20.9064	7.72842	5.43059	18.1294	569.725
TCGA-D7-8570-01A	8.01278	2.01306	9.3401	5087.94	1.65817	43.8181	7.85271	3.81991	8.67625	544.095
TCGA-BR-4368-01A	6.89696	3.34136	7.61458	1041.62	0.836912	30.2816	7.29322	5.33476	12.0496	304.408
TCGA-VQ-A8P3-01A	2.24706	0.965392	4.03154	100.946	0.903667	2.79403	4.77707	5.44817	7.84103	271.454
TCGA-D7-8579-01A	3.29501	0.768485	1.79191	1136.99	0.524143	17.1941	7.08	11.1329	17.3428	447.501
TCGA-BR-8060-01A	3.68181	0.637064	3.37637	4889.58	0.80144	27.1289	5.59132	6.36123	16.5121	319.057
TCGA-VQ-AA69-01A	25.6525	1.61111	4.57463	80.4429	0.450208	11.3413	1.32205	16.1709	27.9476	93.3803
TCGA-VQ-A8E7-01B	2.21737	0.878289	0.847393	159.2	0.189245	3.63596	3.37102	7.38909	11.9226	357.336
TCGA-BR-8371-01A	4.58252	0.916743	1.43903	134.084	0.329136	4.44734	3.16832	4.86173	11.3538	477.304
TCGA-KB-A93J-01A	4.96869	1.06941	4.51916	1747.64	2.43221	27.9764	4.74405	9.48625	9.35588	195.226
TCGA-D7-A4YU-01A	11.8927	2.75525	10.3983	4788.25	0.978496	35.2775	6.84508	6.45014	14.2257	250.004
TCGA-BR-6705-01A	4.0295	1.06304	2.97014	875.618	0.617726	13.161	6.25092	10.0294	47.4567	1914.76
TCGA-D7-A6EX-01A	5.22897	0.45049	1.21384	507.416	0.270962	6.2421	1.93037	6.68595	3.48062	238.906
TCGA-HU-A4G9-01A	1.00868	0.0609171	0.471864	53.3481	0.112889	2.21858	3.35932	5.96596	4.09326	31.578
TCGA-BR-6564-01A	5.37174	1.63454	2.91842	264.702	0.292033	13.0341	4.38314	5.83868	22.7666	810.636
TCGA-CG-4465-01A	2.78798	0.424549	4.08606	707.092	0.79414	39.782	41.0135	7.54925	9.25683	445.027
TCGA-CG-4441-01A	2.32716	0.617963	3.28378	1576.46	0.845036	17.2276	5.46382	9.15792	11.6641	684.644
TCGA-VQ-A8DV-01A	0.989361	1.49482	0.747281	89.7616	0.197005	3.14206	1.92694	5.06247	6.12695	43.8316
TCGA-CG-5719-01A	2.4264	0.476986	2.20936	1353.06	0.42631	13.8451	2.94309	7.41939	24.5267	1199.82
TCGA-HU-A4GX-01A	4.88961	4.76344	6.84268	2272.86	0.941059	7.50801	1.0819	2.25517	3.5657	68.7615
TCGA-BR-8483-01A	1.67887	0.513363	0.966445	347.667	0.346852	2.38937	0.718771	4.22095	3.55898	153.047
TCGA-VQ-A8PC-01A	5.79021	0.786376	2.34711	2361.03	0.519429	29.3233	4.64312	11.5659	16.0213	233.469
TCGA-CD-8526-01A	7.06592	2.1137	2.99573	5801.44	0.571986	11.0333	5.65597	6.52017	15.792	188.905
TCGA-BR-8380-01A	4.15809	0.634192	1.99414	489.483	0.728506	13.7448	4.50856	7.5197	19.0629	874.668
TCGA-D7-8573-01A	1.99692	0.392834	0.919533	718.436	0.355587	4.79292	1.38826	5.84113	5.62651	126.639
TCGA-BR-8291-01A	5.29375	2.43705	5.2767	370.995	1.00778	36.3489	12.4809	6.52766	26.4011	1076.83
TCGA-BR-6803-01A	6.01897	3.38603	5.24903	2506.45	0.527673	12.1649	5.63461	5.1613	22.9711	523.858
TCGA-BR-A4QL-01A	1.99776	1.18145	2.45219	159.563	0.22425	2.49641	0.752093	2.14854	1.82253	100.081
TCGA-BR-8081-01A	7.98004	2.38582	5.89083	4199.48	0.743179	31.8301	7.65298	5.11343	10.2421	631.742
TCGA-HU-A4H4-01A	6.96673	2.24969	7.76211	666.904	0.740749	13.177	3.33562	4.26487	9.45101	178.811
TCGA-VQ-A91K-01A	4.50178	1.19095	2.80189	111.739	0.297982	20.8769	2.18626	6.50854	9.08965	548.049
TCGA-BR-4367-01A	4.61383	1.38029	3.70727	4358.9	0.29903	38.6124	4.93062	5.75507	12.8448	382.143
TCGA-BR-8297-01A	3.65696	0.937153	2.24675	947.42	0.485059	9.5132	3.70481	5.64854	14.6337	502.478
TCGA-BR-8687-01A	2.76988	0.187117	0.822128	151.818	0.281215	7.82789	2.64239	6.52097	7.79478	308.794
TCGA-BR-8683-01A	7.15373	2.44703	5.36023	90.8511	0.529247	18.6532	5.99879	14.3496	30.9103	751.324
TCGA-F1-A72C-01A	3.35758	1.34148	3.88299	1817.5	0.992653	12.2323	7.71099	6.19691	8.88358	657.972
TCGA-VQ-A8PM-01A	4.9358	1.0681	2.59862	5443.44	0.509013	9.18578	3.92317	5.33925	15.1484	194.718
TCGA-VQ-A925-01A	5.34072	1.07172	1.89777	226.554	0.336834	5.12889	47.6864	7.20515	11.9763	128.61
TCGA-IN-7808-01A	18.6399	5.67798	6.99527	4882.39	1.8949	9.24794	7.26114	3.39124	7.97324	78.8618
TCGA-HU-A4G8-01A	4.69821	0.976407	3.66507	645.522	0.635498	11.314	39.6967	4.36987	7.54756	207.363
TCGA-RD-A8N2-01A	2.95769	1.34278	2.36667	45.7023	0.37742	8.9169	5.79924	4.84065	14.8364	715.729
TCGA-B7-A5TJ-01A	1.62222	0.168186	0.760014	189.819	0.111467	4.2952	1.73891	3.88295	7.85173	165.676
TCGA-IN-8462-01A	117.483	0.399132	0.944059	1075.98	0.705697	4.17994	11.8686	4.63864	9.06798	113.555
TCGA-BR-4294-01A	0.416855	0.132934	0.471967	96.7335	0.0942302	7.32981	1.08235	2.10977	8.27002	28.2975
TCGA-BR-A4J4-01A	2.79482	1.0017	2.57888	322.577	0.994796	14.146	5.89648	10.7012	6.85148	409.975
TCGA-IN-7806-01A	37.166	0.280164	0.5329	107.667	0.344493	5.03357	2.02412	7.46832	10.5028	113.395
TCGA-VQ-AA6F-01A	4.5933	0.909463	2.64935	3939.67	0.788337	7.19386	7.86982	10.2883	11.9937	106.523
TCGA-BR-A4J8-01A	2.53045	0.411758	1.30583	230.651	0.274783	4.63295	1.94935	4.67115	10.9131	241.055
TCGA-BR-6707-01A	6.39457	6.84566	9.02745	2709.77	0.997976	13.4383	1.98101	5.10513	8.95978	122.845
TCGA-CG-5732-01A	5.75811	2.34891	2.72731	5453.84	0.513868	8.7447	11.7721	11.8126	6.23584	54.5315
TCGA-HU-A4H0-01A	8.11464	2.62771	6.9039	504.753	0.796835	24.2306	2.83556	5.11291	8.38918	100.825
TCGA-BR-8677-01A	8.55587	5.89597	12.4289	740.625	1.26312	14.5817	5.66534	6.6023	27.3522	1066.86
TCGA-FP-7998-01A	16.1055	17.4326	21.8871	6977.34	1.35262	68.1963	9.30921	5.64415	17.9775	381.296
TCGA-D7-8574-01A	14.2619	3.6998	10.0491	2799.5	1.01661	23.005	6.69476	6.69654	13.5366	752.082
TCGA-BR-4267-01A	1.92401	0.577898	1.12351	649.841	0.262752	15.8343	2.08731	9.4565	8.19535	169.111
TCGA-CD-8532-01A	12.3825	2.6418	5.53259	4210.63	0.572936	18.7358	9.14009	9.10421	11.5944	166.664
TCGA-VQ-A91A-01A	2.16134	0.206273	1.95174	595.37	0.57432	23.588	3.24446	7.73634	24.1357	2177.03
TCGA-CG-4466-01A	1.66352	0.207581	2.7034	76.2953	0.355927	3.95307	3.50606	5.35301	4.86086	48.8544
TCGA-BR-8369-01A	2.42382	0.707293	1.04198	291.756	0.707678	5.6851	2.40258	6.01944	14.659	292.902
TCGA-D7-A4Z0-01A	3.74732	0.564778	1.83164	462.201	0.3933	10.1511	6.99428	6.40958	17.423	220.552
TCGA-CG-4444-01A	3.94245	0.588526	2.49885	3307.62	0.79862	22.2352	5.73034	6.72743	10.1108	141.824
TCGA-BR-7715-01A	2.35194	0.308302	0.792165	57.5115	0.168187	8.40997	1.27093	3.85686	10.6716	581.844
TCGA-BR-8590-01A	6.5711	1.92329	4.50625	2303.52	0.695435	32.1581	7.71845	7.6868	15.3033	701.335
TCGA-VQ-A927-01A	5.47836	0.525016	1.40487	1403.14	0.887235	4.95205	2.28457	6.43256	15.4797	320.721
TCGA-D7-A6EV-01A	2.66426	0.65399	0.931847	642.744	0.157377	5.98905	6.12182	7.1012	6.53366	284.574
TCGA-D7-A748-01A	2.54073	0.652436	1.49196	386.53	0.615362	37.671	14.8568	9.22178	8.94846	1109.94
TCGA-VQ-A91U-01A	6.07824	2.09875	3.6089	4466	0.728488	10.0162	2.36806	4.69272	10.0557	152.294
TCGA-IN-8663-01A	2.70281	0.301245	1.00259	7.83785	0.459972	8.81155	1.53477	11.8386	7.80199	317.884
TCGA-CG-4477-01A	26.6025	1.86936	5.62944	5727.48	1.17941	27.693	8.91781	10.0182	9.96794	140.691
TCGA-BR-7722-01A	2.61276	0.498938	1.17984	421.769	0.372908	7.33093	2.43654	5.14452	12.7855	172.858
TCGA-ZQ-A9CR-01A	3.08818	1.21172	7.31536	4397.25	0.477108	8.42469	4.82477	4.68128	18.8811	780.939
TCGA-CG-4460-01A	3.00893	2.93885	2.51461	865.446	0.416579	12.9865	10.1262	5.76032	7.82617	101.718
TCGA-RD-A8N5-01A	2.16289	0.208231	1.46275	163.612	0.604216	14.3856	2.59578	10.7733	14.1952	1094.35
TCGA-BR-4363-01A	5.31291	2.3458	6.28359	3570.95	1.38265	30.8831	5.08885	9.73705	9.5405	706.742
TCGA-D7-A6EZ-01A	6.38134	3.02615	9.22221	444.67	0.728915	25.2407	3.48414	3.73161	9.60717	515.22
TCGA-IN-A7NT-01A	4.28879	0.0911587	3.44495	157.686	0.598981	13.5817	5.98329	7.06625	5.54327	555.011
TCGA-VQ-A8PD-01A	11.6479	2.72059	7.58169	3638.56	0.919261	16.552	9.94561	11.2765	23.1205	437.387
TCGA-VQ-A924-01A	5.19721	1.65147	6.49812	201.959	0.97807	16.521	3.41338	4.38219	6.41388	515.823
TCGA-CG-4442-01A	1.63562	0.397276	2.3539	268.814	0.581634	9.58566	2.09325	8.26139	4.61199	246.75
TCGA-BR-7959-01A	3.36747	1.73345	1.51764	339.979	0.25594	22.1337	3.5568	7.82842	19.7081	798.544
TCGA-HU-A4GH-01A	2.80286	0.54599	1.17955	439.217	0.714775	4.54876	2.04821	8.04801	3.79565	25.9647
TCGA-HU-A4H8-01A	1.77321	0.406133	1.60516	116.973	0.428173	4.80026	2.97748	6.40493	5.48899	81.7907
TCGA-BR-4370-01A	5.27644	1.45478	6.70243	3137.59	0.95535	28.785	5.93219	17.0137	12.4783	854.854
TCGA-FP-A9TM-01A	5.5437	0.652124	1.95896	774.994	0.518518	6.35622	17.6715	5.98452	6.63217	52.0893
TCGA-BR-6852-01A	11.074	11.4594	39.9413	5686.94	2.74573	30.6316	4.99878	4.59543	9.18582	553.357
TCGA-CG-4476-01A	7.20877	1.78691	2.50833	725.479	0.445011	34.4832	10.443	9.08338	12.9139	408.516
TCGA-VQ-A8DU-01A	3.81296	2.15529	2.21038	322.781	0.521021	6.41054	4.39722	4.98421	5.59219	295.913
TCGA-CG-4443-01A	6.84334	0.0722195	0.36723	2.38434	0.274853	7.75506	0.775736	8.09393	10.33	86.2341
TCGA-BR-4257-01A	3.8009	1.75628	4.74197	122.659	0.519747	37.2968	10.6498	8.91748	8.3432	483.646
TCGA-VQ-A94R-01A	4.93525	1.50834	2.51545	681.67	0.605362	15.206	3.3715	7.33378	13.2692	678.109
TCGA-BR-7723-01A	5.25876	8.49855	4.32643	5308.67	0.608134	19.2276	3.59819	6.06326	10.6977	383.829
TCGA-RD-A8NB-01A	6.23937	1.59097	5.41113	353.69	2.15909	16.2715	5.36184	9.55833	15.4214	504.642
TCGA-D7-6519-01A	2.23349	1.51417	5.40792	11.6868	0.643145	7.6526	2.35402	7.49144	5.39691	331.384
TCGA-BR-6452-01A	5.38854	1.40202	7.42204	2211.45	1.15607	20.5877	6.86226	7.20145	9.40939	470.352
TCGA-IN-A6RR-01A	2.02508	0.572647	1.49867	1223.87	0.533802	3.37471	2.12396	3.85159	8.22659	52.7572
TCGA-VQ-A928-01A	2.28779	0.224325	1.08549	379.8	0.393242	8.72324	1.69338	7.99544	15.9818	865.971
TCGA-BR-A4J7-01A	6.96529	7.61616	9.56581	1555.88	1.15863	14.4298	4.61782	5.22489	13.7749	491.426
TCGA-BR-8059-01A	1.692	0.421307	1.80627	1891.36	0.439327	5.59263	1.63157	7.41337	12.4556	1164.51
TCGA-VQ-A8DT-01A	1.57994	0.637581	1.15515	607.865	0.229476	2.64308	4.60365	4.42119	4.29676	45.9861
TCGA-VQ-A8P8-01A	3.92589	0.641074	1.35004	3691.85	0.307319	5.32794	7.2397	4.52184	12.7691	178.009
TCGA-VQ-A91D-01A	2.85438	0.418686	3.64109	167.951	0.938221	12.0473	1.6535	5.89605	7.12501	597.973
TCGA-BR-7901-01A	4.39319	1.42275	3.20686	802.019	0.398605	19.3074	11.9726	7.0328	17.791	643.979
TCGA-BR-6565-01A	6.05967	2.25978	6.28511	2778.27	0.780387	22.3126	2.7809	4.68669	11.9133	554.874
TCGA-BR-7704-01A	13.5795	3.24545	13.6255	4160.44	0.883413	15.4628	8.63289	3.70577	7.76286	255.656
TCGA-CG-4436-01A	2.3856	1.50536	0.836032	237.175	0.16033	7.3297	1.34741	7.69846	4.70972	59.7136
TCGA-HU-A4G2-01A	2.53567	1.56454	2.73288	238.6	0.952224	8.38027	5.64234	3.33492	19.7311	186.848
TCGA-BR-8682-01A	3.98129	0.886215	1.97788	309.082	0.544381	22.2576	7.32745	10.7509	18.327	367.458
TCGA-VQ-A8PU-01A	1.03777	0.0692649	0.572952	40.4316	0.347954	3.60179	1.10728	8.03945	7.01189	154.954
TCGA-VQ-A8PJ-01A	1.81113	5.2566	0.844022	332.789	0.378658	6.17287	13.0746	9.99215	12.6032	165.537
TCGA-IN-A6RI-01A	1.90542	0.31232	1.45666	262.868	0.1523	2.82001	11.009	7.55208	5.78618	73.8705
TCGA-IN-A7NU-01A	3.95945	0.68224	1.95671	614.021	0.432671	7.2146	5.26304	7.15695	6.48596	321.448
TCGA-CD-8534-01A	3.01882	0.642388	1.63473	361.453	0.677885	6.51024	3.68951	5.11285	10.2671	100.241
TCGA-D7-6815-01A	2.33937	1.77902	1.39422	740.093	0.24135	12.7927	2.31695	8.89167	7.39641	451.867
TCGA-FP-8631-01A	3.4463	0.263763	0.576017	1139.81	0.672466	6.87833	4.46301	5.81644	10.3218	443.444
TCGA-BR-8381-01A	10.2776	4.20061	9.94643	7936.02	0.898948	21.6769	5.17855	4.2896	7.3259	332.768
TCGA-D7-A6EY-01A	8.6007	4.2636	5.86212	1806.11	1.00409	19.1491	8.85761	10.9638	9.53821	295.343
TCGA-D7-6526-01A	1.68843	0.395008	0.607066	134.261	0.17698	6.69522	7.88033	9.03658	7.39135	159.174
TCGA-BR-8364-01A	6.06549	2.25567	5.69059	554.244	0.834851	31.9071	10.5775	7.07322	19.8011	1628.2
TCGA-BR-6563-01A	6.48694	5.61836	6.62947	3433.89	0.523613	16.9315	6.1433	4.09569	12.9744	572.448
TCGA-CG-4306-01A	4.03807	0.947558	3.99546	1724.05	0.515097	17.1096	4.83796	7.96107	7.00498	370.081
TCGA-BR-8676-01A	2.61881	2.64446	3.71826	210.575	0.727052	8.3344	2.39854	3.92034	3.92474	31.4974
TCGA-CG-5721-01A	11.807	5.98718	24.993	1531.11	1.13089	35.593	7.29983	4.65206	6.87278	277.949
TCGA-HF-7133-01A	5.67673	2.71303	4.00617	3078.7	0.748396	31.529	10.3289	8.97949	12.3257	279.914
TCGA-BR-4279-01A	4.46319	3.5882	5.49335	3705.2	1.1528	29.8583	8.54092	8.35576	14.9765	686.122
TCGA-CD-8528-01A	1.38892	0.28137	1.80052	103.883	0.388378	16.6664	2.9769	8.23785	7.23887	717.776
TCGA-HU-A4GC-01A	1.87927	0.974241	1.87818	634.254	0.422827	5.38125	1.76409	4.9401	6.37334	158.25
TCGA-CD-5813-01A	7.56557	3.82699	5.60478	3911.1	0.441217	31.5763	9.11482	5.69114	29.4898	1185.38
TCGA-MX-A663-01A	2.98384	1.33531	2.34811	174.7	0.795762	11.1808	3.63281	6.80442	27.9558	1111.74
TCGA-BR-6457-01A	4.54895	1.90372	3.60183	4009.06	0.550343	13.3434	6.50752	6.14381	23.9918	1071.19
TCGA-VQ-A8P5-01A	2.9668	0.821181	5.33862	862.016	1.29281	9.77382	2.46446	4.66477	8.06592	651.296
TCGA-FP-7916-01A	9.47837	4.20499	11.276	7742.44	1.12733	38.8029	5.0783	5.20919	13.7501	298.285
TCGA-BR-4187-01A	3.86147	2.81771	2.96618	257.935	0.486161	52.6202	11.813	11.8879	18.8777	1076.64
TCGA-KB-A93H-01A	2.08476	14.7488	0.844716	10.856	0.106977	4.36285	0.524681	3.63373	3.69122	36.7878
TCGA-BR-8592-01A	5.52666	1.15277	2.9973	3000.7	0.90212	15.2923	5.85558	7.29664	20.8133	756.663
TCGA-BR-4366-01A	2.48902	6.06048	1.87797	1021.06	0.521354	19.8803	2.61016	9.37873	7.13201	232.707
TCGA-BR-7851-01A	4.91974	1.2669	4.53411	2997.41	1.07185	16.0147	2.51983	5.69926	10.9685	701.33
TCGA-SW-A7EA-01A	2.60868	1.41057	8.24531	325.354	0.868886	5.28124	5.51609	3.4657	3.65179	823.26
TCGA-CD-5803-01A	19.9917	9.45573	14.9386	185.835	0.741406	38.8498	12.8507	6.19073	31.7379	1077.43
TCGA-D7-6525-01A	2.71174	0.620185	3.20605	250.918	0.673401	15.7913	1.83489	12.1559	7.89124	709.509
TCGA-RD-A8N9-01A	4.76925	1.68875	3.18163	4982.83	0.542819	17.8744	7.51126	4.349	22.5375	748.986
TCGA-IN-AB1X-01A	32.9224	5.50413	12.1523	2806.9	2.51354	12.9002	6.10774	9.26515	10.3942	106.189
TCGA-BR-8080-01A	5.32442	1.25511	4.86425	3018.23	0.749878	20.5947	6.59301	6.37201	23.8454	539.812
TCGA-BR-A4PF-01A	5.42062	4.78027	4.24075	324.317	0.984338	25.3589	3.53559	22.1993	5.35343	200.242
TCGA-HU-A4G3-01A	1.03461	0.270516	1.07021	132.65	0.303598	4.80612	3.49754	3.90612	6.94531	110.258
TCGA-CD-8531-01A	6.29206	0.355658	0.984852	1579.91	0.161394	15.5808	2.5803	7.32936	7.44701	473.888
TCGA-R5-A7ZF-01A	1.96092	0.254877	1.16401	59.6201	0.576445	1.58	1.27047	3.9609	6.07708	95.0544
TCGA-VQ-A94T-01A	1.01864	0.101962	2.93934	134.673	0.882528	7.46008	14.392	9.83204	15.1623	238.045
TCGA-D7-A6F2-01A	4.51501	1.94308	3.32708	721.028	0.382118	12.9061	4.11305	5.466	6.88903	171.263
TCGA-BR-8384-01A	7.53242	3.43926	6.26178	452.988	0.918003	19.7844	9.42397	8.74821	29.3622	859.176
TCGA-B7-A5TN-01A	2.3791	0.539577	1.28142	474.595	0.231642	10.742	4.37307	5.2872	10.7223	1104.83
TCGA-B7-A5TI-01A	2.75135	0.586136	1.63789	3004.96	0.39077	10.207	2.64589	3.08466	16.5047	683.681
TCGA-BR-8368-01A	4.99433	1.41506	2.84842	1687.3	0.806205	5.38767	2.1626	6.15282	10.5288	104.196
TCGA-BR-4357-01A	9.35601	2.07144	6.50068	4965.13	1.32843	35.4616	3.65056	5.82807	7.01486	313.663
TCGA-CG-5718-01A	3.62629	0.696449	2.99633	2258.57	0.307921	11.7373	2.12442	6.68638	9.61383	210.601
TCGA-HU-8244-01A	2.52206	0.346741	0.471475	20.5749	0.442837	2.23351	1.97118	4.77929	3.6633	16.0887
TCGA-VQ-AA6J-01A	7.62208	3.57115	3.33446	678.826	0.454508	26.1769	6.49608	6.87673	11.3864	443.376
TCGA-CG-5724-01A	1.81168	0.822482	1.72748	234.792	0.374719	9.77843	1.40334	5.41946	6.2053	599.063
TCGA-VQ-A94O-01A	8.60255	0.970879	3.8451	506.186	0.334808	9.11559	1.61399	9.07057	14.0473	184.818
TCGA-BR-8591-01A	4.27844	0.398894	3.95322	5355.2	0.610033	16.3581	7.75043	6.08479	13.3943	442.481
TCGA-VQ-AA64-01A	4.90244	1.17544	1.48539	246.527	0.38043	7.30011	2.93438	6.62861	16.5241	1862.72
TCGA-FP-8099-01A	2.88605	0.137779	1.34996	1230.48	0.518036	16.2962	5.05569	7.7022	6.71133	518.727
TCGA-F1-A448-01A	3.96439	0.499721	3.24083	2109.15	0.650177	19.2159	78.1639	7.93013	15.211	362.592
TCGA-VQ-A91V-01A	1.84715	0.40097	0.786497	121.533	0.447351	3.36396	2.65772	6.67267	6.97	90.1189
TCGA-VQ-A8E3-01A	6.75019	1.55817	10.1515	1680.32	5.66984	9.01394	11.1368	5.36651	9.94547	223.498
TCGA-CD-8525-01A	3.24603	3.28932	4.85881	6661.61	1.01212	9.84605	3.60215	3.53946	7.0389	295.153
TCGA-FP-A4BF-01A	8.86319	3.86144	26.2505	4956.33	4.13505	28.1818	5.06598	3.53674	6.87839	682.865
TCGA-FP-A8CX-01A	8.40454	0.771503	1.24336	2397.58	0.279767	7.38515	2.65786	3.60076	6.46277	126.282
TCGA-RD-A7BS-01A	21.8588	0.900331	2.94408	1390.24	1.57174	6.48928	18.3471	5.42256	9.61471	129.783
TCGA-BR-7716-01A	10.9129	17.7396	10.5299	2866.37	0.744369	31.1582	4.936	6.82299	11.2795	275.703
TCGA-MX-A666-01A	7.27075	5.73274	1.3882	2264.8	0.614885	7.32013	3.21919	13.4115	13.6538	121.23
TCGA-VQ-AA6G-01A	1.91733	0.170135	0.834773	637.666	0.333695	7.66509	3.16205	7.70768	13.2774	131.666
TCGA-HU-A4H5-01A	2.91755	0.489091	1.98017	2917.09	0.677077	7.2297	10.2631	10.5718	9.84446	182.002
TCGA-BR-8484-01A	9.27853	2.12687	5.83345	3621.58	0.522021	31.9586	7.56627	7.96913	13.3258	215.445
TCGA-F1-6875-01A	19.1889	9.24265	0.602439	44.212	0.165422	5.7322	0.476705	7.60501	9.20969	222.52
TCGA-CG-4437-01A	4.04417	1.99564	6.26042	1987.09	0.580421	20.1924	2.2811	6.36861	7.52001	467.02
TCGA-HF-A5NB-01A	4.02954	0.96176	2.94478	8.29559	0.397845	6.86979	0.85462	6.77709	7.34096	204.129
TCGA-BR-8365-01A	6.42528	2.27157	3.72876	2053.73	0.440699	16.6447	6.85689	7.95609	26.0089	609.48
TCGA-CD-8527-01A	2.29377	1.89822	2.44585	535.734	0.324061	9.03975	1.95516	3.72113	5.55573	167.743
TCGA-D7-A6F0-01A	8.18188	5.63317	3.98547	2457.38	0.898832	18.729	5.75053	7.33518	8.23512	170.454
TCGA-BR-7957-01A	2.9462	1.19052	2.88135	150.599	0.455132	15.3539	7.22447	10.9869	30.5122	1897.37
TCGA-BR-8678-01A	5.9352	10.9034	2.85424	304.689	0.794998	8.53021	2.32135	10.8838	8.00967	616.639
TCGA-FP-8211-01A	3.55857	1.35235	2.35102	528.148	0.270553	4.58379	1.54816	6.35376	6.30269	88.3918
TCGA-D7-6528-01A	2.4063	0.158184	1.65177	109.581	0.392679	3.57837	0.513578	8.48848	7.05978	312.67
TCGA-HU-8238-01A	2.26476	0.592046	1.08554	524.45	0.610282	7.17573	7.77751	4.18608	6.71851	87.5893
TCGA-BR-8367-01A	3.04454	0.980503	2.78289	388.182	0.695546	20.5449	5.54924	10.3701	23.1231	413.582
TCGA-BR-7196-01A	4.93269	3.93408	7.10603	8667.56	1.36061	20.5105	6.32328	5.95805	29.1397	687.664
TCGA-FP-7829-01A	1.41517	0.026907	0.266438	157.763	0.152678	15.2208	3.86169	6.80519	13.0741	800.88
TCGA-VQ-A922-01A	2.95199	1.17893	0.957566	364.88	0.500796	9.10916	2.27973	8.27685	24.7425	1027.72
TCGA-RD-A8N0-01A	9.87576	3.50935	7.32781	6152.74	1.02586	8.96226	5.94356	4.20473	8.35773	168.434
TCGA-CG-5725-01A	2.09197	56.4021	1.45854	388.683	0.181419	3.43107	2.14477	6.60536	9.62823	106.818
TCGA-CG-4305-01A	7.19636	2.7809	8.09463	751.487	1.41299	34.351	6.27957	7.55007	7.15979	395.279
TCGA-BR-6455-01A	6.07758	5.27854	8.29222	1093.63	1.61867	24.8867	9.28885	11.6681	13.2618	264.585
TCGA-BR-6802-01A	6.3701	3.50709	14.5306	1711.27	1.7744	14.4598	4.55205	6.90463	11.3214	492.738
TCGA-BR-6709-01A	11.0796	8.64367	11.5396	7540.04	1.02793	49.7256	8.39231	10.7574	9.15511	572.132
TCGA-B7-A5TK-01A	11.5187	9.92355	24.998	2504.1	2.34227	29.9109	6.02921	3.87463	11.4497	461.374
TCGA-CD-A4MH-01A	5.80366	1.6481	0.873661	2107.01	0.23414	5.71346	2.66882	7.88422	4.04673	130.84
TCGA-BR-6710-01A	13.6057	0.88125	1.45787	1958.53	0.451761	4.02065	1.15295	4.91177	8.89553	79.4415
TCGA-D7-6522-01A	12.7991	5.18831	7.08987	3600.04	0.636473	45.1854	19.9857	6.00864	21.7005	781.467
TCGA-F1-6177-01A	6.1276	0.465192	2.17609	22.7452	0.543142	8.12454	2.49871	5.469	9.25274	295.669
TCGA-BR-4201-01A	5.22025	0.428772	5.23044	2101.28	1.66665	30.3771	5.45914	11.3012	11.0686	1047.2
TCGA-BR-4361-01A	8.46695	1.92359	5.77742	970.904	0.810108	33.1139	5.08237	6.8642	6.64445	606.924
TCGA-FP-8209-01A	16.6859	4.87729	10.9224	233.446	1.14878	28.805	17.8606	10.6887	31.4045	932.294
TCGA-FP-8210-01A	13.9106	4.57921	8.76916	1451.67	1.22952	26.3847	13.2152	9.83172	26.0458	948.293
TCGA-HU-8604-01A	8.46592	2.83787	15.2922	9991.7	3.78182	23.562	2.53871	5.70987	13.9022	520.572
TCGA-VQ-AA6A-01A	2.07562	0.188822	0.976691	376.388	0.461575	6.74401	1.99708	5.94144	7.09889	161.097
TCGA-RD-A8N1-01A	12.5297	3.1827	6.86421	3183.51	1.53557	18.441	7.08082	6.66992	9.96974	227.383
TCGA-BR-A44U-01A	1.1743	0.0858199	0.905524	39.1116	0.169387	2.45976	1.04568	2.99891	5.57898	312.15
TCGA-CG-4469-01A	3.24592	0.183344	1.08843	45.5112	0.661287	23.1718	5.64287	7.85604	8.1711	147.693
TCGA-VQ-A8PH-01A	7.74385	6.04187	2.4865	1120.23	0.220664	3.98288	2.37573	4.47651	5.43741	101.615
TCGA-D7-8576-01A	1.86756	0.498939	0.73144	1150.03	0.245918	20.3184	3.50333	7.90523	15.3166	250.464
TCGA-CG-4438-01A	6.51454	1.63353	8.29816	454.238	0.96255	27.9895	4.31423	5.32297	6.03894	117.059
TCGA-VQ-AA6K-01A	3.87431	2.03405	4.08646	1432.18	0.548013	6.01556	2.09353	7.71804	9.88968	226.926
TCGA-BR-8485-01A	8.34401	3.54496	8.26195	2950.94	1.03281	15.6505	4.30625	6.52078	16.0198	485.332
TCGA-HU-A4GJ-01A	21.479	5.01179	8.44317	8629.38	0.670495	10.858	6.1474	4.41946	9.62626	88.4534
TCGA-BR-8686-01A	8.61996	4.80465	9.6231	5498.93	0.905551	21.4305	7.49212	6.57488	23.9171	252.833
TCGA-BR-8589-01A	11.16	11.5372	19.4883	854.686	2.78338	30.7106	9.05831	4.88911	8.44313	50.3417
TCGA-RD-A8N6-01A	3.92908	2.34748	1.05142	21.2988	0.386173	9.07096	6.35711	8.2675	9.16241	290.614
TCGA-D7-6524-01A	3.00054	0.463039	1.57445	154.213	0.295529	23.072	10.851	16.1896	30.1353	1384.03
TCGA-CG-5722-01A	16.8346	6.16174	20.7462	4125.12	2.92606	18.9377	12.6232	4.72847	13.3439	119.379
TCGA-BR-8486-01A	7.61124	0.400919	2.39996	1208.37	0.437854	11.433	3.36361	11.9906	20.5815	398.697
TCGA-VQ-A8PE-01A	8.44816	5.04722	3.60959	3855.9	1.06418	12.8386	3.16509	12.189	9.43077	204.083
TCGA-RD-A7C1-01A	4.58522	3.43718	6.03933	974.156	2.12677	16.4832	2.81423	7.03004	6.93942	136.502
TCGA-VQ-A91X-01A	3.46651	0.104568	0.293581	456.473	0.108865	1.35334	0.614569	8.19908	2.00682	39.5648
TCGA-BR-A4J5-01A	2.77675	0.737435	2.00213	1108.61	0.436326	13.4041	4.8502	4.68295	14.5607	1016.24
TCGA-CD-5798-01A	1.98632	1.10289	1.67533	153.439	0.396334	16.1544	6.44485	4.64372	13.1262	1280.69
TCGA-D7-6527-01A	1.78775	0.415144	1.02957	2399.43	0.184909	11.0831	3.43405	5.45593	9.5922	145.058
TCGA-BR-8289-01A	2.28164	0.923345	1.27013	753.717	0.27042	16.7709	1.98444	3.66519	8.86134	335.069
TCGA-BR-6801-01A	1.53646	0.27887	0.756654	9.58743	0.123269	4.30618	0.777611	4.89375	6.79286	434.12
TCGA-CG-5734-01A	5.22922	0.883328	3.72695	6933.69	1.4458	15.3752	4.18423	4.81364	7.01029	87.8441
TCGA-R5-A805-01A	4.50239	0.740147	1.90236	780.106	0.368479	20.6859	2.81468	14.7276	12.8165	280.505
TCGA-3M-AB46-01A	1.42376	0.224738	0.507554	88.239	0.122376	2.82051	1.13558	3.41449	4.72729	229.826
TCGA-CG-5716-01A	9.89287	0.977577	1.36519	6081.06	0.283021	6.0773	2.75365	5.40636	7.91624	62.3948
TCGA-BR-4253-01A	17.1271	8.76038	25.5375	2117.7	1.48003	71.5049	9.75012	6.58835	8.77171	132.274
TCGA-BR-8058-01A	11.4062	3.25368	9.41511	2145.43	0.728561	32.9056	8.69065	10.3416	13.8647	458.295
TCGA-CG-5720-01A	3.57363	1.14104	2.2476	2225.93	1.06952	16.3725	3.20256	8.55343	14.5527	197.393
TCGA-HU-A4H3-01A	3.05638	0.968737	4.54761	234.519	0.998884	4.36273	0.889729	5.02004	10.9833	246.193
TCGA-IP-7968-01A	6.09533	2.6251	7.68809	187.985	0.927286	15.6147	4.00619	8.96004	26.4302	482.189
TCGA-VQ-A8E2-01A	10.2549	6.31095	4.51442	506.9	0.72037	11.8989	3.38182	7.66654	17.5047	735.909
TCGA-MX-A5UG-01A	11.9632	2.59133	5.32559	3744.71	0.879937	25.9856	9.55241	11.2884	32.1616	1515.22
TCGA-RD-A8N4-01A	4.73613	1.82599	3.05865	700.781	0.450992	8.92707	4.451	7.17235	14.4856	538.283
TCGA-IN-A6RJ-01A	168.909	0.384325	1.08219	301.105	0.589534	2.12359	34.0895	7.36062	4.39377	23.8287
TCGA-CG-4301-01A	4.01863	0.348771	1.54301	330.269	0.314308	30.0952	4.79846	8.12269	12.4528	304.256
TCGA-CG-5723-01A	4.40286	3.79335	8.8271	1795.4	0.979584	18.0726	13.5679	4.64418	5.08647	188.914
TCGA-VQ-AA6D-01A	4.33784	4.69472	0.857614	90.9205	0.185438	6.53058	1.8636	10.0512	5.18444	146.165
TCGA-F1-6874-01A	5.74272	1.48138	8.20566	112.646	1.92884	24.2923	6.61584	16.4998	31.2205	815.029
TCGA-CG-4304-01A	3.89578	0.916159	1.99295	4368.49	0.461869	19.5862	2.83029	10.9318	7.93769	342.194
TCGA-VQ-A923-01A	12.9554	6.77583	12.8549	2234.32	1.1041	20.3054	7.4462	4.92523	17.415	169.031
TCGA-VQ-A8PF-01A	12.1524	6.04415	12.2539	4800.67	1.14672	39.6313	8.75938	6.0582	22.9207	267.138
TCGA-BR-8361-01A	5.31034	3.9004	7.90494	583.197	2.12601	8.32776	1.45276	4.47682	8.0339	141.11
TCGA-BR-8690-01A	4.60733	2.75657	7.00656	2970.43	0.966801	9.99614	3.72067	2.5356	4.27966	224.771
TCGA-HJ-7597-01A	5.46244	3.23312	9.59933	601.02	2.29128	5.61677	1.42527	9.49479	8.34252	223.357
TCGA-RD-A7BT-01A	3.67597	0.965221	1.38189	422.873	0.137016	4.38707	1.74946	7.00927	6.04686	64.3068
TCGA-MX-A5UJ-01A	2.79203	0.743404	2.29607	857.918	0.281376	7.41016	3.21805	6.24949	15.3956	524.065
TCGA-VQ-A91Q-01A	3.00113	0.143762	2.01763	958.696	0.522834	6.02088	20.411	12.738	24.0369	610.692
TCGA-D7-5578-01A	4.16037	1.08343	4.07061	4482.41	0.461564	14.6899	3.4983	7.32609	15.7108	284.228
TCGA-SW-A7EB-01A	6.28736	2.6982	3.27794	906.93	0.549913	5.23879	2.98371	5.3259	6.51516	98.3316
TCGA-HU-A4GU-01A	4.38489	0.318586	1.90565	22.4044	0.229036	5.07798	0.867171	6.37258	4.99072	352.567
TCGA-D7-6521-01A	5.01881	2.86152	3.82146	1656.26	0.231792	20.0894	3.11422	4.53557	12.6521	514.125
TCGA-D7-A4YX-01A	6.09735	2.89128	7.62393	536.821	1.01383	18.0925	2.25644	5.73631	7.00652	175.636
TCGA-IN-AB1V-01A	159.991	0.694358	1.57623	386.778	3.73387	2.36358	11.7417	11.3709	7.13106	39.3549
TCGA-HF-7134-01A	2.34088	0.429967	1.85481	1819.85	0.625198	10.2653	2.77869	8.74796	29.4452	192.527
TCGA-CD-A48C-01A	1.72167	1.89766	1.3232	663.789	0.211609	7.87476	1.96025	3.39032	5.37526	501.917
TCGA-HU-8610-01A	10.4529	0.227155	5.85145	705.116	0.539321	26.4236	5.78709	7.04792	27.8492	478.652
TCGA-BR-8373-01A	5.14308	1.80183	3.26859	372.31	0.493406	21.0102	5.06857	14.5813	17.5983	814.139
TCGA-EQ-8122-01A	1.69013	0.683902	0.897153	84.0161	0.296302	10.6513	1.74437	6.86337	16.1773	443.764
TCGA-B7-5818-01A	5.30808	2.1991	4.263	221.384	0.420622	15.7293	7.09249	5.65689	5.72306	290.586
TCGA-CD-A487-01A	1.60259	0.428186	0.786745	23.0222	0.227479	3.07107	5.63957	8.67874	9.95345	529.464
TCGA-CD-8535-01A	2.69096	0.0596654	1.21376	19.559	0.315944	6.54133	1.49142	7.59262	7.64333	585.16
TCGA-HF-7131-01A	4.59893	1.05651	3.17962	1161.75	0.664149	21.5104	2.01403	9.48205	18.9248	227.313
TCGA-CD-5799-01A	3.08335	0.222433	0.868035	278.209	0.120702	4.51273	0.914744	3.97533	7.95346	584.165
TCGA-VQ-A91S-01A	6.5524	8.92246	6.75587	68.2297	0.92922	10.3338	7.69648	7.79497	15.428	127.011
TCGA-HU-A4GY-01A	16.2246	2.43341	7.05199	418.379	0.765077	35.5815	13.6331	4.60175	13.6647	526.919
TCGA-HU-8608-01A	17.6796	7.25985	17.7222	4229.54	2.22371	66.9028	5.16877	10.1006	20.7659	327.886
TCGA-CD-A489-01A	3.87365	1.97821	2.55881	243.697	0.375711	8.35647	4.66931	6.10221	10.7505	492.053
TCGA-BR-6566-01A	2.62726	0.916698	5.02258	3623.9	1.15393	12.1879	8.06349	2.81966	4.24587	844.473
TCGA-BR-A4J6-01A	2.96509	0.521429	2.03081	1849.2	0.198005	3.11743	4.14217	5.11985	5.82963	171.039
TCGA-BR-8286-01A	3.32447	1.31064	3.19222	194.032	0.646928	12.9097	6.92845	4.18827	16.2595	257.015
TCGA-CD-8529-01A	7.64345	2.23619	4.78001	5359.76	0.892733	42.017	6.40495	7.47445	22.5428	560.887

## Sheet: Table S4
Supplementary Table 4. Tumor microenvironment pathways in TCGA-STAD based on IOBR genesets.
ID	CD_8_T_effector	DDR	Immune_Checkpoint	CellCycle_Reg	Pan_F_TBRs	EMT1	EMT2	EMT3	Cell_cycle	Mismatch_Repair	Homologous_recombination	Nucleotide_excision_repair	DNA_replication	Base_excision_repair	TMEscoreA_CIR	TMEscoreB_CIR	CD8_Rooney_et_al	B_cells_Rooney_et_al	Treg_Rooney_et_al	Macrophages_Rooney_et_al	Neutrophils_Rooney_et_al	pDCs_Rooney_et_al	Co_stimulation_APC_Rooney_et_al	Co_stimulation_T_cell_Rooney_et_al	Co_inhibition_APC_Rooney_et_al	Co_inhibition_T_cell_Rooney_et_al	Type_I_IFN_Reponse_Rooney_et_al	T_cell_inflamed_GEP_Ayers_et_al	IFNG_signature_Ayers_et_al	MDSC_Wang_et_al	GPAGs	PPAGs	HLA_signature_gene	B_cells_Danaher_et_al	Cytotoxic_cells_Danaher_et_al	Mast_cells_Danaher_et_al	Neutrophils_Danaher_et_al	T_cells_Danaher_et_al	TIP_Release_of_cancer_cell_antigens	TIP_Cancer_antigen_presentation_1	TIP_Priming_and_activation_1	TIP_Priming_and_activation_2	TIP_Trafficking_of_immune_cells_to_tumors	TIP_Infiltration_of_immune_cells_into_tumors_1	TIP_Infiltration_of_immune_cells_into_tumors_2	TIP_Recognition_of_cancer_cells_by_T_cells_1	TIP_Recognition_of_cancer_cells_by_T_cells_2	TIP_Killing_of_cancer_cells_2	TLS_Nature
TCGA-3M-AB46-01A	0.226395	0.387528	0.124211	0.446983	0.46298	0.495335	0.397028	0.455512	0.44934	0.449108	0.379567	0.438402	0.474686	0.454968	0.330053	0.295946	0.183628	-0.00643825	0.0440266	0.29337	0.228481	0.117803	0.209282	0.131826	0.302751	0.0941978	0.367399	0.326127	0.353592	0.27715	0.374238	0.444856	0.0996985	-0.190074	0.198273	0.158366	0.0365775	0.153124	0.173119	-0.039158	0.138269	0.0730011	0.315513	0.428581	0.444062	0.223116	0.0747432	0.218803	0.0716488
TCGA-3M-AB47-01A	0.299862	0.355341	0.270857	0.432909	0.492467	0.50179	0.444186	0.464826	0.431989	0.409483	0.33725	0.408924	0.424113	0.430472	0.329449	0.404709	0.291239	0.338205	0.0840952	0.272337	0.321098	0.23272	0.31735	0.283736	0.428576	0.255413	0.365954	0.406953	0.335558	0.29785	0.423944	0.420581	0.255061	0.296334	0.26203	0.18078	-0.0615786	0.363072	0.197409	0.016602	0.251526	0.207401	0.347731	0.42587	0.42186	0.302584	0.195136	0.263116	0.273122
TCGA-B7-5818-01A	0.472667	0.363488	0.372887	0.377904	0.488644	0.422122	0.413532	0.423545	0.44356	0.432539	0.359096	0.419377	0.463312	0.459765	0.412394	0.18543	0.452995	0.0652584	0.0521363	0.399058	0.293254	0.266116	0.263582	0.288557	0.35126	0.312395	0.32588	0.472847	0.495651	0.36954	0.367714	0.437384	0.243469	-0.19	0.390761	0.176228	0.276001	0.342617	0.196565	0.0628119	0.255391	0.237034	0.391444	0.457807	0.445706	0.325825	0.320282	0.312012	0.207397
TCGA-B7-A5TI-01A	0.359209	0.383364	0.29909	0.448797	0.495802	0.479846	0.442764	0.459926	0.449297	0.430463	0.375475	0.432042	0.453724	0.449792	0.36318	0.356573	0.328816	0.273945	0.0744565	0.370806	0.27087	0.224521	0.291372	0.258425	0.410286	0.235395	0.328211	0.409935	0.400645	0.333028	0.414166	0.471121	0.238426	0.226633	0.312156	0.368	0.113463	0.290814	0.205	0.0303305	0.229443	0.191748	0.354794	0.458479	0.449268	0.309768	0.268286	0.267578	0.242379
TCGA-B7-A5TJ-01A	0.210708	0.36915	0.134738	0.442981	0.484755	0.477314	0.392978	0.416869	0.441375	0.406689	0.354407	0.414307	0.440225	0.450626	0.298331	0.322575	0.181398	0.0453893	0.0321265	0.392538	0.22784	0.183825	0.187656	0.107942	0.319588	0.116876	0.296966	0.291192	0.299224	0.268965	0.372168	0.459868	0.129771	-0.132206	0.202698	0.204302	0.0563089	0.142841	0.170445	-0.021109	0.127544	0.0695655	0.274461	0.431779	0.416092	0.192247	0.0665865	0.230608	0.159227
TCGA-B7-A5TK-01A	0.533437	0.368683	0.437657	0.444032	0.518357	0.453476	0.448314	0.463853	0.443042	0.428437	0.359813	0.430328	0.451021	0.438796	0.46406	0.384701	0.52795	0.208675	0.117679	0.385307	0.325824	0.279926	0.33138	0.342006	0.463119	0.421099	0.489255	0.528986	0.562525	0.399904	0.433965	0.448219	0.329397	0.105937	0.489247	0.359663	0.275012	0.463036	0.221009	0.0862677	0.347087	0.344452	0.419992	0.458006	0.435975	0.350787	0.324335	0.349406	0.229462
TCGA-B7-A5TN-01A	0.299951	0.360049	0.280651	0.466751	0.519814	0.512643	0.472723	0.486096	0.429919	0.402288	0.344659	0.408404	0.427636	0.444688	0.333324	0.366731	0.287036	0.100562	0.115336	0.364883	0.310554	0.218591	0.24751	0.221106	0.404191	0.211721	0.411353	0.38778	0.379098	0.316736	0.422617	0.470367	0.18745	-0.0860394	0.254762	0.399296	0.176865	0.23392	0.21252	0.0408631	0.195765	0.153881	0.325069	0.433992	0.415936	0.297227	0.24888	0.28051	0.183157
TCGA-BR-4187-01A	0.359781	0.354284	0.319631	0.4404	0.516906	0.519883	0.48793	0.488714	0.430882	0.411757	0.327094	0.413318	0.422471	0.427711	0.360462	0.470474	0.429019	0.288507	0.159876	0.366746	0.406848	0.330392	0.273441	0.265197	0.447731	0.313073	0.463338	0.455641	0.358044	0.407723	0.479197	0.416234	0.296398	0.19015	0.36108	0.465653	0.368608	0.354479	0.220117	0.1181	0.270588	0.270257	0.4025	0.450498	0.423812	0.288798	0.232172	0.311688	0.268003
TCGA-BR-4191-01A	0.428621	0.354348	0.363475	0.44893	0.505718	0.495037	0.423572	0.451577	0.436443	0.417568	0.336503	0.410583	0.43685	0.431445	0.406265	0.331996	0.419218	0.250545	0.174294	0.423865	0.388015	0.275586	0.308401	0.295738	0.452908	0.345116	0.42885	0.476945	0.454377	0.409648	0.437158	0.45076	0.293373	0.189624	0.380553	0.417021	0.331667	0.377909	0.208419	0.127135	0.283459	0.265595	0.428543	0.479909	0.475599	0.343386	0.321866	0.321982	0.289613
TCGA-BR-4201-01A	0.422956	0.382903	0.346727	0.460592	0.516012	0.511268	0.480552	0.464831	0.447775	0.41762	0.354569	0.429697	0.436552	0.443219	0.427293	0.39668	0.36	0.26195	0.0709164	0.412352	0.368155	0.220034	0.302873	0.286764	0.428543	0.294921	0.408047	0.458476	0.482567	0.398517	0.461648	0.459932	0.277245	0.205757	0.385398	0.418511	0.403967	0.307357	0.222723	0.0948212	0.275468	0.238052	0.40922	0.451838	0.440296	0.338306	0.29187	0.301526	0.165144
TCGA-BR-4253-01A	0.539667	0.403018	0.468771	0.459649	0.448224	0.4314	0.355156	0.413197	0.461595	0.458261	0.389104	0.445928	0.475217	0.453532	0.486673	0.217635	0.524659	0.252215	0.100668	0.427827	0.348671	0.290091	0.328277	0.371735	0.50763	0.443674	0.435046	0.544109	0.567268	0.438392	0.426761	0.441515	0.345511	0.156563	0.499511	0.242077	0.364129	0.478322	0.223193	0.14255	0.356999	0.374034	0.426126	0.486102	0.488814	0.36802	0.34453	0.360635	0.234654
TCGA-BR-4256-01A	0.466052	0.377057	0.410963	0.469276	0.529441	0.509769	0.474746	0.473358	0.455384	0.415831	0.354566	0.425097	0.442692	0.443613	0.457892	0.418786	0.457182	0.285249	0.10991	0.433454	0.465407	0.25914	0.297237	0.319536	0.472139	0.366872	0.471243	0.500961	0.5191	0.466946	0.472317	0.459616	0.321028	0.139091	0.41829	0.384995	0.475186	0.378367	0.232651	0.113043	0.308246	0.305872	0.435881	0.488671	0.46301	0.337482	0.271302	0.347567	0.253965
TCGA-BR-4257-01A	0.453365	0.385238	0.378257	0.456597	0.493544	0.504477	0.458501	0.444252	0.45515	0.430118	0.359403	0.427105	0.453378	0.454584	0.426325	0.326352	0.449722	0.155827	0.0862982	0.454871	0.29765	0.252275	0.285646	0.291023	0.451053	0.315923	0.375823	0.460308	0.475258	0.376894	0.431724	0.465855	0.254481	-0.233699	0.393981	0.208612	0.376349	0.348852	0.204338	0.080813	0.278604	0.236308	0.39299	0.47365	0.457269	0.311846	0.215585	0.289287	0.0880937
TCGA-BR-4267-01A	0.324116	0.381883	0.276143	0.466262	0.471205	0.440968	0.391542	0.416992	0.434886	0.433228	0.351739	0.430079	0.443533	0.456277	0.375501	0.305401	0.292726	0.211051	0.0454562	0.368336	0.349442	0.158935	0.252685	0.225643	0.444459	0.224857	0.345756	0.388216	0.396277	0.368986	0.420641	0.464855	0.222676	0.0824197	0.242959	0.184836	0.381864	0.26868	0.210774	0.0998085	0.206667	0.167849	0.368063	0.458202	0.446	0.278382	0.221562	0.257055	0.199287
TCGA-BR-4279-01A	0.403938	0.348051	0.323656	0.429575	0.509928	0.512711	0.496278	0.473938	0.428785	0.407175	0.310091	0.414976	0.418889	0.419054	0.399747	0.458211	0.455582	0.213678	0.141921	0.445536	0.366543	0.279289	0.295351	0.268946	0.433693	0.318397	0.418285	0.452082	0.439319	0.416347	0.485923	0.42434	0.281117	0.150675	0.406463	0.418085	0.412296	0.357268	0.210646	0.122127	0.273358	0.233514	0.434349	0.441082	0.418357	0.300679	0.25394	0.317401	0.260626
TCGA-BR-4280-01A	0.445141	0.390679	0.352914	0.457031	0.449213	0.472859	0.343261	0.394849	0.454951	0.42602	0.370764	0.432117	0.454269	0.46223	0.407725	0.232983	0.428858	0.127966	0.131716	0.36253	0.321092	0.202568	0.260759	0.29544	0.444124	0.303424	0.360545	0.455416	0.477394	0.358931	0.386721	0.414305	0.239552	0.031384	0.3637	0.0144945	0.294044	0.330924	0.192008	0.0738856	0.259834	0.231217	0.368717	0.441586	0.440271	0.300451	0.201111	0.284858	0.1349
TCGA-BR-4294-01A	0.216772	0.330266	0.0889323	0.424812	0.417868	0.406513	0.256055	0.331575	0.37532	0.397435	0.249607	0.412273	0.391247	0.420456	0.208754	0.351954	0.232891	-0.0156462	-0.00746527	0.298821	0.315294	0.162088	0.0839037	-0.00441125	0.315262	0.0764533	0.294762	0.272178	0.267007	0.270258	0.38515	0.391874	0.0899797	-0.325725	0.178654	0.0708519	0.186061	0.107264	0.187337	0.00689225	0.0488576	0.0108831	0.237302	0.388875	0.368973	0.0958642	-0.00570203	0.198621	0.183311
TCGA-BR-4357-01A	0.463996	0.380481	0.392579	0.475637	0.501489	0.500563	0.425317	0.429296	0.455659	0.435871	0.371109	0.427507	0.449726	0.451618	0.437224	0.321954	0.44366	0.230315	0.141662	0.457469	0.322078	0.239325	0.288001	0.334399	0.411001	0.344517	0.419343	0.483633	0.507475	0.406997	0.417086	0.451435	0.298545	0.189178	0.419797	0.172134	0.307122	0.359476	0.213823	0.0984947	0.301215	0.259368	0.412487	0.470273	0.455895	0.377414	0.359567	0.337538	0.252355
TCGA-BR-4361-01A	0.438546	0.398545	0.388918	0.448277	0.50429	0.504389	0.467005	0.439404	0.465823	0.431806	0.382292	0.438967	0.463191	0.457769	0.436446	0.357331	0.417794	0.158825	0.0883952	0.373157	0.30094	0.23528	0.313919	0.326536	0.452726	0.346512	0.418604	0.477281	0.489136	0.37889	0.413573	0.42897	0.265623	-0.0337298	0.408345	0.371827	0.234826	0.37798	0.217908	0.0636924	0.299257	0.279256	0.362455	0.465555	0.452653	0.352473	0.258434	0.301482	0.124512
TCGA-BR-4363-01A	0.439543	0.392177	0.359835	0.430184	0.507846	0.441315	0.46532	0.441324	0.455206	0.443484	0.385007	0.435237	0.465145	0.45681	0.423527	0.360591	0.422267	0.24344	0.0713393	0.392483	0.372439	0.227498	0.248192	0.298312	0.461515	0.32667	0.390872	0.481558	0.505301	0.374807	0.420972	0.434041	0.285367	0.199343	0.391883	0.255127	0.17072	0.350664	0.211708	0.0740633	0.275484	0.277813	0.372604	0.475211	0.468346	0.313353	0.295682	0.301505	0.191829
TCGA-BR-4366-01A	0.275624	0.369856	0.167509	0.47171	0.48443	0.484526	0.367885	0.404801	0.45006	0.425061	0.354332	0.407291	0.433884	0.436117	0.333557	0.339465	0.312996	0.0718057	0.0448645	0.403204	0.353847	0.158208	0.197086	0.149467	0.381946	0.193686	0.413108	0.330067	0.359469	0.312337	0.399774	0.43824	0.182619	-0.123285	0.201717	0.180333	0.186366	0.19038	0.201755	0.027414	0.177348	0.143805	0.29971	0.452306	0.450334	0.218077	0.10886	0.234491	0.122538
TCGA-BR-4367-01A	0.436846	0.372352	0.386283	0.457225	0.490396	0.487177	0.458922	0.456423	0.447011	0.431367	0.362196	0.418956	0.448711	0.448284	0.435747	0.36048	0.424892	0.225565	0.0930868	0.435864	0.307241	0.240272	0.313719	0.314678	0.45368	0.321242	0.442328	0.485538	0.513825	0.403641	0.448726	0.443136	0.281809	0.109555	0.37819	0.403072	0.350515	0.373646	0.209063	0.118195	0.28971	0.226841	0.408934	0.454696	0.435107	0.315429	0.258754	0.313434	0.205339
TCGA-BR-4368-01A	0.472081	0.390955	0.396672	0.456284	0.508094	0.468306	0.419783	0.42603	0.450477	0.428786	0.362371	0.431808	0.446723	0.451342	0.431091	0.374611	0.461065	0.312141	0.0709208	0.378971	0.315856	0.284729	0.317611	0.301976	0.41735	0.340668	0.421097	0.489567	0.501123	0.368395	0.446502	0.421793	0.301493	0.218534	0.42222	0.400907	0.264029	0.3789	0.224689	0.0683651	0.301602	0.290458	0.365761	0.471518	0.445079	0.33829	0.26433	0.290272	0.180094
TCGA-BR-4369-01A	0.339471	0.369659	0.280496	0.455653	0.495667	0.484557	0.408834	0.429329	0.450166	0.422438	0.363991	0.41987	0.441564	0.432388	0.361874	0.364173	0.30692	0.217056	0.143659	0.332764	0.357403	0.191265	0.267833	0.292704	0.388002	0.289479	0.294553	0.427806	0.442016	0.318569	0.383343	0.415047	0.256598	0.152774	0.273374	0.334713	0.128765	0.355159	0.194323	0.0452351	0.263901	0.244899	0.340129	0.441245	0.450801	0.28856	0.245212	0.25623	0.222249
TCGA-BR-4370-01A	0.420723	0.372274	0.352093	0.475269	0.519618	0.517528	0.487983	0.463748	0.441952	0.40602	0.336483	0.416175	0.417167	0.428024	0.424479	0.407343	0.394744	0.309082	0.152226	0.398217	0.377451	0.225954	0.304698	0.315553	0.446384	0.328299	0.445701	0.464467	0.487562	0.397141	0.462288	0.46541	0.296453	0.250908	0.381589	0.424673	0.4073	0.338492	0.230812	0.124309	0.289538	0.246565	0.418103	0.463879	0.448118	0.336584	0.316452	0.309865	0.18276
TCGA-BR-4371-01A	0.357981	0.386055	0.228351	0.448898	0.429727	0.456612	0.337743	0.374508	0.45034	0.436822	0.373769	0.430696	0.448425	0.458263	0.382132	0.233483	0.314577	0.0423242	0.0963987	0.332173	0.257566	0.157044	0.304032	0.22882	0.404955	0.236888	0.428086	0.41694	0.453208	0.321018	0.369418	0.408285	0.18527	-0.11314	0.313099	0.241465	0.134689	0.301159	0.196383	0.0545808	0.22512	0.187671	0.328037	0.403514	0.438224	0.294991	0.150482	0.246926	0.0663235
TCGA-BR-6452-01A	0.456192	0.384285	0.366973	0.451824	0.491391	0.485319	0.43845	0.435766	0.455234	0.416708	0.358911	0.422076	0.446495	0.45686	0.42736	0.295878	0.424842	0.2188	0.0662191	0.394927	0.276915	0.257123	0.279963	0.315404	0.435133	0.318144	0.356607	0.466745	0.481735	0.364119	0.412643	0.467193	0.284403	0.155119	0.391278	0.298697	0.219026	0.354561	0.196293	0.0720644	0.282879	0.270197	0.401955	0.46382	0.440863	0.328137	0.310514	0.29859	0.139845
TCGA-BR-6453-01A	0.38829	0.34332	0.350419	0.426899	0.497087	0.509244	0.410695	0.466659	0.426947	0.403719	0.329387	0.397271	0.435712	0.449811	0.370732	0.387158	0.434278	0.483423	0.194384	0.387574	0.338566	0.371998	0.304555	0.371112	0.42488	0.334424	0.376365	0.490364	0.370204	0.387248	0.454264	0.406537	0.349298	0.47279	0.361993	0.456378	0.158978	0.445414	0.185321	0.0918215	0.319081	0.307238	0.412955	0.454689	0.418986	0.358258	0.267702	0.318042	0.370857
TCGA-BR-6454-01A	0.482137	0.37301	0.386867	0.446928	0.459921	0.483896	0.388904	0.429747	0.442538	0.419305	0.356035	0.409062	0.447697	0.458934	0.425509	0.336686	0.482174	0.335599	0.105117	0.342238	0.315	0.298315	0.317476	0.349809	0.421188	0.344469	0.401828	0.516309	0.515232	0.377087	0.420769	0.458665	0.324036	0.325241	0.421786	0.32101	0.235291	0.431507	0.192237	0.0738754	0.324123	0.31469	0.425163	0.472621	0.438702	0.340466	0.267491	0.298007	0.256014
TCGA-BR-6455-01A	0.44289	0.397015	0.342724	0.439289	0.495755	0.45585	0.407196	0.437516	0.459509	0.450912	0.390102	0.441522	0.476971	0.464565	0.412826	0.339317	0.435389	0.258157	0.179577	0.380968	0.272023	0.273861	0.281214	0.29814	0.395782	0.329547	0.36038	0.466533	0.493897	0.36231	0.408548	0.441054	0.279223	0.164574	0.375984	0.267525	0.142569	0.375187	0.21214	0.071448	0.267706	0.256139	0.392937	0.460913	0.446831	0.315733	0.247773	0.277401	0.267689
TCGA-BR-6456-01A	0.387148	0.375154	0.327397	0.460046	0.519285	0.515596	0.481446	0.482332	0.453217	0.424066	0.365423	0.410803	0.451235	0.445557	0.385651	0.422534	0.373492	0.252531	0.0760866	0.428984	0.296676	0.253268	0.338473	0.319553	0.42955	0.285016	0.425856	0.419251	0.422491	0.383923	0.44454	0.458819	0.271126	0.167716	0.333518	0.426801	0.198242	0.336056	0.221774	0.0982605	0.28825	0.239561	0.366921	0.482992	0.463652	0.332234	0.217229	0.295231	0.166163
TCGA-BR-6457-01A	0.375248	0.326144	0.28478	0.411006	0.526428	0.516368	0.489187	0.492384	0.413327	0.383411	0.293413	0.382667	0.408658	0.430151	0.343006	0.455156	0.4064	0.328058	0.122658	0.348319	0.295421	0.266562	0.247488	0.28016	0.406142	0.242972	0.371029	0.454128	0.379144	0.342006	0.460855	0.454886	0.279575	0.340702	0.358153	0.373899	0.161255	0.355518	0.206743	0.0502168	0.235033	0.18274	0.391681	0.45007	0.429967	0.291825	0.254165	0.304633	0.263513
TCGA-BR-6458-01A	0.426524	0.380009	0.367864	0.470433	0.508718	0.488935	0.446755	0.422957	0.449447	0.433064	0.364314	0.414606	0.449149	0.458027	0.410416	0.366294	0.411577	0.288744	0.0799431	0.396032	0.295968	0.329812	0.29428	0.330595	0.42389	0.326099	0.382073	0.466228	0.456493	0.352261	0.432498	0.452833	0.283945	0.163096	0.367535	0.238298	0.0968681	0.374924	0.207561	0.0769006	0.282867	0.246128	0.382658	0.469806	0.44378	0.329927	0.266411	0.273778	0.163655
TCGA-BR-6563-01A	0.429116	0.33377	0.361119	0.43646	0.510833	0.514498	0.465773	0.487042	0.410006	0.386097	0.296724	0.399189	0.405341	0.425358	0.36441	0.439762	0.46088	0.405873	0.128072	0.406429	0.333525	0.324807	0.312381	0.351685	0.438148	0.35567	0.390773	0.490371	0.431421	0.362168	0.447169	0.427668	0.340862	0.393156	0.42442	0.483612	0.182459	0.42669	0.212393	0.063226	0.317088	0.294496	0.412379	0.440706	0.399098	0.34256	0.324041	0.321895	0.322787
TCGA-BR-6564-01A	0.354217	0.313694	0.286861	0.406562	0.516064	0.509561	0.486154	0.513295	0.397581	0.368902	0.271977	0.382192	0.39673	0.423818	0.292486	0.463432	0.381029	0.22355	0.0651524	0.324019	0.291825	0.272988	0.259612	0.251205	0.40884	0.202232	0.482662	0.449376	0.347493	0.302613	0.457428	0.427417	0.237617	0.142602	0.324743	0.445184	0.0204582	0.347697	0.208517	0.0413471	0.221124	0.16593	0.320229	0.41314	0.352666	0.26088	0.164107	0.253023	0.168415
TCGA-BR-6565-01A	0.448845	0.386173	0.375914	0.440061	0.518863	0.504205	0.440899	0.463377	0.452975	0.44317	0.374325	0.421967	0.464182	0.464823	0.425586	0.369413	0.428938	0.277017	0.073331	0.405942	0.283256	0.263356	0.238312	0.31953	0.420816	0.317577	0.386604	0.477617	0.495374	0.368497	0.412032	0.446877	0.29753	0.214355	0.379242	0.347706	0.113126	0.361449	0.213637	0.0658693	0.283091	0.264175	0.367083	0.474578	0.462683	0.318359	0.254602	0.295651	0.198846
TCGA-BR-6566-01A	0.419694	0.354657	0.364668	0.413618	0.50341	0.50191	0.48169	0.449091	0.437658	0.414599	0.353083	0.407509	0.45176	0.459965	0.410573	0.285594	0.41747	0.144403	0.0517703	0.412401	0.271074	0.242436	0.248011	0.263662	0.443631	0.30867	0.401643	0.459439	0.460804	0.37466	0.392038	0.448141	0.254066	0.0743234	0.406965	0.232342	0.243875	0.344083	0.198031	0.0515024	0.255803	0.237591	0.366579	0.443061	0.401975	0.304731	0.232581	0.313988	0.104322
TCGA-BR-6705-01A	0.315799	0.338726	0.271226	0.425489	0.536112	0.515606	0.489497	0.475103	0.423564	0.394244	0.329248	0.388201	0.419058	0.442032	0.336509	0.437135	0.329509	0.240455	0.052152	0.353615	0.291737	0.217666	0.236875	0.241479	0.396914	0.203758	0.371069	0.414184	0.335841	0.327066	0.463453	0.439522	0.219558	0.179307	0.312293	0.393563	0.109115	0.275358	0.202331	0.0140461	0.209303	0.157125	0.350144	0.462005	0.452235	0.258864	0.138429	0.248774	0.20524
TCGA-BR-6707-01A	0.488695	0.374181	0.372419	0.423549	0.480086	0.457892	0.379673	0.443975	0.448629	0.439768	0.378825	0.428373	0.471126	0.464377	0.423176	0.257746	0.492818	0.175252	0.0708042	0.367316	0.272144	0.251342	0.274162	0.309472	0.421863	0.341936	0.368943	0.504798	0.52235	0.323271	0.350583	0.434059	0.269991	0.178103	0.445701	0.322641	0.0119228	0.417963	0.185294	0.0141077	0.279075	0.247322	0.377397	0.463452	0.459049	0.307133	0.219064	0.25455	0.250964
TCGA-BR-6709-01A	0.484023	0.374996	0.451634	0.447094	0.511248	0.302517	0.48662	0.408182	0.445663	0.413669	0.355776	0.415769	0.445433	0.44909	0.432675	0.315722	0.493158	0.340163	0.146111	0.374491	0.308948	0.340564	0.298592	0.379126	0.46997	0.367636	0.417863	0.519236	0.502878	0.380489	0.403937	0.439533	0.33306	0.316556	0.42864	0.104925	0.243155	0.440919	0.233005	0.112018	0.340712	0.319191	0.380245	0.473055	0.446397	0.371839	0.33178	0.28329	0.230366
TCGA-BR-6710-01A	0.312945	0.301031	0.141356	0.368768	0.466515	0.361425	0.345908	0.409943	0.376227	0.358602	0.235326	0.377306	0.380496	0.421016	0.223147	0.395027	0.379829	0.134894	-0.0246208	0.256714	0.253621	0.147715	0.0720559	0.134642	0.387034	0.159839	0.442089	0.367479	0.24625	0.256784	0.403895	0.392246	0.142943	0.0250538	0.299341	0.471065	0.0628208	0.190994	0.171588	-0.0230325	0.117507	0.0917704	0.26747	0.411523	0.396531	0.125301	0.0438741	0.193434	0.181796
TCGA-BR-6801-01A	0.229513	0.3554	0.16455	0.434729	0.518126	0.495847	0.454143	0.447089	0.432983	0.409232	0.344417	0.404099	0.430611	0.447599	0.337374	0.38235	0.237131	0.0352773	-0.00376567	0.384954	0.245306	0.164015	0.213441	0.0756049	0.345564	0.123729	0.375534	0.293985	0.298766	0.300441	0.380257	0.448755	0.121288	-0.346354	0.261251	0.0929204	0.0226953	0.0782432	0.204721	-0.0230055	0.123055	0.0722784	0.329255	0.426233	0.418316	0.183355	0.0383141	0.217097	0.125024
TCGA-BR-6802-01A	0.486393	0.379851	0.399546	0.4606	0.50392	0.493634	0.430228	0.43628	0.447338	0.418813	0.365404	0.418767	0.45149	0.46119	0.448094	0.297862	0.485629	0.291815	0.0706978	0.347836	0.320668	0.236513	0.29699	0.304478	0.451115	0.366995	0.458845	0.504499	0.520871	0.388798	0.40963	0.473649	0.304872	0.267982	0.458043	0.294736	0.28098	0.395906	0.215459	0.0465291	0.296764	0.269973	0.40801	0.464564	0.444728	0.340676	0.306292	0.326478	0.216034
TCGA-BR-6803-01A	0.404105	0.347391	0.307157	0.434043	0.509543	0.445713	0.466648	0.494272	0.425753	0.394416	0.320492	0.395852	0.42251	0.440085	0.348128	0.463637	0.42554	0.324324	0.0289131	0.343959	0.298921	0.285369	0.284099	0.31	0.414355	0.283049	0.377865	0.461228	0.393599	0.338757	0.463038	0.455258	0.290795	0.267165	0.373438	0.425485	0.044959	0.389244	0.208634	0.0639264	0.274432	0.241316	0.373675	0.445871	0.423137	0.311108	0.257302	0.297384	0.21551
TCGA-BR-6852-01A	0.522985	0.371184	0.457967	0.463702	0.500087	0.499521	0.417704	0.438486	0.448793	0.413326	0.357069	0.407824	0.441852	0.460821	0.463952	0.271912	0.529066	0.269786	0.0952889	0.399831	0.314948	0.300241	0.321467	0.357963	0.478801	0.407966	0.457311	0.530529	0.54053	0.39821	0.400435	0.449161	0.333868	0.237817	0.475605	0.294583	0.284078	0.433586	0.213384	0.0694445	0.33738	0.313985	0.422987	0.480838	0.452167	0.354295	0.311798	0.340496	0.184841
TCGA-BR-7196-01A	0.453571	0.37358	0.362659	0.437693	0.5238	0.46059	0.467007	0.49002	0.443001	0.422595	0.35419	0.424513	0.451594	0.449717	0.422784	0.428113	0.453039	0.331049	0.203939	0.375256	0.306946	0.302646	0.29453	0.316957	0.436632	0.329295	0.432751	0.48156	0.489054	0.382957	0.462747	0.454571	0.315237	0.323404	0.415099	0.418651	0.231532	0.369016	0.221717	0.0885039	0.287568	0.248018	0.408189	0.479131	0.472698	0.318512	0.263205	0.304825	0.301949
TCGA-BR-7197-01A	0.157991	0.375068	0.0304633	0.426629	0.506113	0.48277	0.407942	0.433118	0.447299	0.425382	0.365837	0.418144	0.44983	0.451788	0.274154	0.36488	0.135781	0.0144619	-0.0514281	0.346177	0.207067	0.108798	0.152026	0.0637622	0.240084	0.0326438	0.32143	0.24462	0.224103	0.198145	0.384165	0.458365	0.0870558	-0.0828141	0.129571	0.0876953	-0.166446	0.00569686	0.172252	-0.0390091	0.0728652	0.00990728	0.241002	0.438552	0.437575	0.173257	0.00522351	0.215907	0.0979389
TCGA-BR-7704-01A	0.488275	0.377834	0.408769	0.449717	0.487284	0.486827	0.4048	0.434718	0.447054	0.426694	0.366592	0.43161	0.463236	0.465972	0.422268	0.29384	0.476665	0.293065	0.130409	0.361187	0.277538	0.247561	0.292886	0.384821	0.418499	0.360296	0.360214	0.515594	0.516991	0.361213	0.39995	0.451282	0.3086	0.264947	0.450286	0.155573	0.1938	0.428105	0.197378	0.0641106	0.320336	0.299123	0.414352	0.464755	0.430238	0.35828	0.267424	0.292343	0.225978
TCGA-BR-7707-01A	0.422376	0.388462	0.372004	0.452642	0.492325	0.487527	0.439625	0.419915	0.459866	0.439054	0.384385	0.433829	0.471402	0.474862	0.443161	0.2384	0.413263	0.124146	0.0668606	0.328923	0.256741	0.154924	0.251974	0.266212	0.410139	0.272383	0.400012	0.473439	0.480807	0.357844	0.389576	0.468703	0.213872	-0.175089	0.409661	0.242364	0.302067	0.295707	0.196404	0.0153021	0.242107	0.200082	0.412443	0.454398	0.439001	0.302101	0.202933	0.288667	0.0608187
TCGA-BR-7715-01A	0.275402	0.388753	0.270214	0.47782	0.515296	0.504258	0.454558	0.470528	0.462003	0.424319	0.373926	0.419712	0.453164	0.454266	0.338216	0.381807	0.26354	0.0415753	0.102449	0.359686	0.235382	0.133739	0.168688	0.175906	0.36451	0.189714	0.402726	0.331069	0.316246	0.292055	0.418082	0.451108	0.142705	-0.301986	0.235992	0.359055	0.0727129	0.184926	0.19587	0.00839869	0.156876	0.116413	0.322901	0.459647	0.458248	0.251351	0.264213	0.268353	0.138687
TCGA-BR-7716-01A	0.467894	0.372522	0.399321	0.476687	0.503739	0.488012	0.423919	0.439568	0.444338	0.419165	0.362918	0.417845	0.440114	0.451345	0.412406	0.369747	0.478474	0.311404	0.105351	0.425028	0.302241	0.35248	0.321768	0.364706	0.433248	0.351223	0.411215	0.496748	0.499512	0.380637	0.416804	0.463651	0.335338	0.259292	0.379508	0.3732	0.189676	0.410386	0.214821	0.0880701	0.333088	0.336938	0.387157	0.466057	0.442605	0.380841	0.329514	0.335515	0.178702
TCGA-BR-7717-01A	0.244192	0.357682	0.168999	0.442982	0.50581	0.505034	0.442398	0.459465	0.442284	0.41615	0.354737	0.415378	0.448301	0.461861	0.333606	0.365636	0.343811	0.23661	0.017646	0.357349	0.259311	0.231521	0.21568	0.174215	0.348676	0.132442	0.399262	0.362629	0.287572	0.294064	0.420392	0.463971	0.188611	0.201906	0.277533	0.288183	0.139116	0.214306	0.197096	0.0131215	0.179718	0.107027	0.354558	0.428647	0.425839	0.222028	0.0780774	0.257759	0.195504
TCGA-BR-7722-01A	0.264904	0.337708	0.152093	0.387263	0.486971	0.484231	0.39452	0.453745	0.394779	0.396484	0.318293	0.401443	0.406007	0.440425	0.291636	0.34519	0.262837	0.130918	0.136169	0.357127	0.269872	0.194035	0.210814	0.180558	0.346167	0.152371	0.371784	0.370021	0.310509	0.267821	0.387805	0.44381	0.182815	0.0386482	0.266903	0.482829	-0.0658328	0.232725	0.174913	0.0370595	0.180346	0.170081	0.318526	0.423878	0.41696	0.225687	0.102413	0.230959	0.16975
TCGA-BR-7723-01A	0.405933	0.394758	0.344868	0.476709	0.484648	0.475081	0.396712	0.425483	0.46368	0.445056	0.381633	0.425124	0.460971	0.459359	0.393606	0.358231	0.40037	0.278765	0.123815	0.39908	0.291302	0.268628	0.270663	0.312445	0.40316	0.302366	0.32133	0.439409	0.452398	0.331584	0.406443	0.449532	0.271605	0.271696	0.318308	0.149295	0.132176	0.34757	0.210809	0.0314839	0.263676	0.220074	0.315782	0.466682	0.458155	0.348833	0.252399	0.23258	0.218332
TCGA-BR-7851-01A	0.42787	0.387785	0.338971	0.432835	0.509806	0.483496	0.434548	0.425496	0.455155	0.421095	0.364097	0.425573	0.446107	0.454229	0.408109	0.338316	0.390212	0.287672	0.0549107	0.397926	0.28487	0.233125	0.252539	0.293004	0.433597	0.298402	0.321151	0.433829	0.453753	0.368556	0.420919	0.438538	0.275767	0.252856	0.362211	0.343617	0.196284	0.322384	0.205595	0.0537905	0.25057	0.221418	0.381013	0.464407	0.457963	0.302466	0.225034	0.289081	0.219076
TCGA-BR-7901-01A	0.381596	0.361402	0.301767	0.47443	0.514935	0.511854	0.470835	0.481819	0.438103	0.403809	0.346878	0.400826	0.425531	0.439839	0.371304	0.424698	0.371129	0.169527	0.103135	0.415988	0.325483	0.242679	0.286585	0.263706	0.416151	0.257129	0.419491	0.425993	0.418718	0.385299	0.44203	0.468152	0.253775	0.147095	0.317869	0.294636	0.27527	0.307522	0.217215	0.0713632	0.241094	0.193167	0.412678	0.460719	0.449793	0.313056	0.214142	0.297806	0.203894
TCGA-BR-7957-01A	0.27338	0.369842	0.22562	0.454106	0.527038	0.515516	0.491221	0.493	0.444833	0.41635	0.354194	0.4212	0.437037	0.43835	0.338944	0.449188	0.322366	0.183606	0.0123672	0.329158	0.334188	0.263358	0.284087	0.218801	0.40531	0.203067	0.359615	0.367874	0.282878	0.345511	0.465175	0.44838	0.217908	0.005148	0.264042	0.428143	0.23339	0.260116	0.213287	0.0415761	0.205236	0.144704	0.340563	0.454721	0.44532	0.261877	0.106685	0.278281	0.172024
TCGA-BR-7958-01A	0.512068	0.366479	0.447056	0.464311	0.504242	0.484344	0.424584	0.466646	0.452656	0.43917	0.363264	0.418421	0.463419	0.447661	0.452965	0.300796	0.51867	0.208219	0.111482	0.402009	0.300666	0.365351	0.336777	0.354333	0.47693	0.372804	0.415028	0.529831	0.536543	0.391301	0.420785	0.457585	0.326678	0.171597	0.470402	0.433051	0.262334	0.446479	0.209659	0.0853961	0.322314	0.298805	0.43656	0.484529	0.469691	0.366801	0.320965	0.314988	0.270774
TCGA-BR-7959-01A	0.306894	0.370109	0.2913	0.451524	0.527635	0.516946	0.497538	0.487318	0.442698	0.401061	0.342905	0.408962	0.424129	0.43623	0.35523	0.431794	0.323643	0.175381	0.131863	0.3999	0.290583	0.245905	0.273264	0.219271	0.402049	0.240019	0.431421	0.366147	0.371662	0.383166	0.438127	0.465784	0.222531	-0.0269034	0.246252	0.428352	0.29531	0.241635	0.205568	0.0457963	0.21266	0.176731	0.368274	0.456514	0.44523	0.256329	0.201119	0.27477	0.169238
TCGA-BR-8058-01A	0.443501	0.371417	0.380937	0.4584	0.512212	0.466026	0.464845	0.479059	0.44412	0.416373	0.359413	0.414274	0.445334	0.448313	0.423401	0.395985	0.451089	0.365665	0.154056	0.387929	0.351103	0.360817	0.327298	0.363702	0.456317	0.354441	0.41317	0.496994	0.458666	0.390013	0.427532	0.450777	0.348984	0.341386	0.397995	0.42633	0.341982	0.429565	0.203076	0.0933757	0.325037	0.322967	0.424752	0.480543	0.457534	0.355189	0.335609	0.31285	0.244356
TCGA-BR-8059-01A	0.31827	0.363878	0.222875	0.438276	0.532357	0.524857	0.495731	0.500606	0.430598	0.41969	0.356091	0.414276	0.43267	0.435696	0.350078	0.41053	0.286657	0.129388	0.0869123	0.343669	0.27037	0.137882	0.20832	0.175158	0.358114	0.162185	0.332909	0.361319	0.384205	0.314559	0.422594	0.478096	0.167286	-0.0769176	0.312218	0.156282	0.0782184	0.182561	0.209305	0.00563817	0.173024	0.120192	0.357546	0.431174	0.424015	0.239993	0.107789	0.238162	0.144729
TCGA-BR-8060-01A	0.404565	0.382358	0.34164	0.481927	0.506465	0.474945	0.433537	0.408767	0.466532	0.415024	0.352323	0.401095	0.442904	0.445031	0.410592	0.412352	0.354256	0.250952	0.181287	0.375278	0.328725	0.226503	0.235113	0.247951	0.399743	0.300901	0.393048	0.431078	0.437875	0.388719	0.451208	0.408913	0.267242	0.204296	0.323449	0.281879	0.277578	0.275841	0.237362	0.0748594	0.250507	0.259443	0.393213	0.45084	0.429289	0.321696	0.263835	0.322844	0.162652
TCGA-BR-8077-01A	0.423955	0.370802	0.348632	0.470021	0.465675	0.489527	0.391129	0.449585	0.445698	0.416786	0.381508	0.419866	0.453527	0.443867	0.400429	0.319422	0.462101	0.194463	0.125879	0.366024	0.303625	0.249571	0.235282	0.305709	0.404911	0.298541	0.394016	0.468466	0.478801	0.361583	0.40494	0.411435	0.262288	0.108544	0.384721	0.397096	0.177869	0.352873	0.195889	0.0348798	0.271943	0.28024	0.405436	0.466165	0.452739	0.289915	0.219746	0.286822	0.146741
TCGA-BR-8080-01A	0.388051	0.363631	0.318117	0.452267	0.520625	0.51451	0.485849	0.488487	0.435964	0.419896	0.358643	0.405659	0.436806	0.440723	0.379613	0.435785	0.400168	0.354989	0.131186	0.397351	0.321708	0.259996	0.315111	0.290578	0.422184	0.288071	0.362338	0.444134	0.386428	0.40268	0.458371	0.452799	0.300158	0.323591	0.356413	0.420685	0.297444	0.343755	0.213486	0.0860509	0.262711	0.207314	0.425678	0.455839	0.441069	0.320598	0.247385	0.291104	0.217934
TCGA-BR-8081-01A	0.471575	0.382631	0.430548	0.447547	0.492377	0.497477	0.447857	0.440732	0.449306	0.427413	0.377296	0.42358	0.460234	0.456132	0.451132	0.342224	0.452842	0.371345	0.120608	0.420102	0.307388	0.306499	0.305426	0.365278	0.46888	0.375804	0.419969	0.510925	0.518545	0.415085	0.433995	0.440647	0.341621	0.351978	0.414461	0.355811	0.225989	0.400801	0.21829	0.105089	0.331564	0.31852	0.429246	0.476941	0.446635	0.379841	0.304023	0.344874	0.205117
TCGA-BR-8284-01A	0.466626	0.377699	0.371701	0.442465	0.509925	0.474296	0.452188	0.452076	0.451132	0.419575	0.368515	0.420152	0.456325	0.450966	0.420389	0.376037	0.481958	0.273035	0.0821148	0.384326	0.330848	0.306016	0.311876	0.32295	0.438914	0.338446	0.361674	0.493668	0.472974	0.384911	0.428671	0.435568	0.309658	0.189174	0.42405	0.365772	0.236628	0.426239	0.209558	0.0842796	0.295769	0.274784	0.41196	0.4769	0.465045	0.320392	0.243225	0.318307	0.210304
TCGA-BR-8286-01A	0.355607	0.378681	0.280768	0.453299	0.471979	0.48657	0.414098	0.445929	0.456512	0.450624	0.372714	0.428066	0.47229	0.463204	0.39357	0.32857	0.351577	0.115144	0.069897	0.331415	0.285812	0.19692	0.249742	0.22414	0.3913	0.229635	0.356293	0.423916	0.400462	0.329128	0.396599	0.453795	0.20468	-0.0192849	0.308476	0.41976	0.183368	0.261587	0.196221	0.0342961	0.221104	0.188301	0.359076	0.464595	0.473462	0.273604	0.175353	0.264342	0.167366
TCGA-BR-8289-01A	0.256777	0.382689	0.227631	0.47192	0.50602	0.480497	0.426316	0.403095	0.449213	0.411347	0.36289	0.420799	0.441766	0.455822	0.320723	0.389216	0.286812	0.190135	0.0687293	0.381823	0.236807	0.196998	0.268098	0.210249	0.374444	0.208054	0.355292	0.347597	0.29708	0.275223	0.40468	0.448265	0.189809	0.083071	0.213439	0.422975	-0.0191045	0.230361	0.199914	0.0181513	0.206293	0.173096	0.265856	0.432193	0.415462	0.23959	0.13975	0.232793	0.183215
TCGA-BR-8291-01A	0.361668	0.35299	0.304605	0.449855	0.519065	0.522539	0.483031	0.498416	0.426267	0.395037	0.331641	0.401267	0.414734	0.431553	0.351881	0.428286	0.419691	0.272654	0.156024	0.403588	0.327927	0.269684	0.309251	0.271652	0.411099	0.285645	0.33863	0.429548	0.321808	0.372727	0.453867	0.457806	0.277908	0.144038	0.387466	0.41406	0.264733	0.354607	0.21939	0.0654892	0.272636	0.25191	0.374342	0.468325	0.46166	0.296439	0.251523	0.283773	0.290167
TCGA-BR-8295-01A	0.100711	0.373115	-0.0384994	0.448283	0.45766	0.422435	0.313446	0.343068	0.460327	0.435673	0.369349	0.415608	0.468117	0.456644	0.249995	0.29816	0.0166378	0.0677658	-0.0580892	0.233737	0.246471	0.0702517	0.0438242	0.0398251	0.172402	0.07577	0.206397	0.183414	0.246223	0.165225	0.339648	0.416413	0.043383	0.116382	0.0285848	0.183928	0.00452364	0.020345	0.180177	-0.151964	0.0574916	0.0492701	0.190321	0.398854	0.424708	0.138668	-0.184035	0.166349	0.110572
TCGA-BR-8296-01A	0.368177	0.349103	0.306877	0.452713	0.486958	0.468901	0.391754	0.448394	0.437033	0.417304	0.334288	0.398288	0.437567	0.441857	0.368377	0.304988	0.363706	0.418481	0.127479	0.302541	0.361384	0.282019	0.271237	0.310857	0.393611	0.302785	0.456749	0.455676	0.391905	0.324246	0.402901	0.4617	0.292353	0.390205	0.313436	0.424599	0.230527	0.403032	0.200994	0.0703247	0.261	0.238832	0.390811	0.467477	0.453702	0.313604	0.291591	0.298228	0.193395
TCGA-BR-8297-01A	0.332428	0.370234	0.261455	0.429553	0.509143	0.509356	0.462162	0.492411	0.43691	0.412757	0.356277	0.417506	0.432719	0.439676	0.337372	0.465695	0.34192	0.321847	0.129626	0.288901	0.265638	0.214057	0.184601	0.219894	0.376293	0.238458	0.397302	0.417065	0.366301	0.271999	0.447282	0.436388	0.238669	0.253901	0.290596	0.395737	-0.0285828	0.299597	0.203405	0.037942	0.205186	0.197754	0.334757	0.425394	0.408739	0.250942	0.20341	0.252006	0.219719
TCGA-BR-8361-01A	0.444017	0.397126	0.375327	0.459015	0.469014	0.466783	0.327907	0.418528	0.458401	0.429261	0.376731	0.430521	0.460067	0.467675	0.413102	0.239144	0.452696	0.202678	0.0515369	0.254569	0.303078	0.238557	0.260006	0.302124	0.405898	0.343806	0.420151	0.482737	0.496315	0.323939	0.348247	0.430841	0.251285	0.0506194	0.387295	0.146742	0.274421	0.381751	0.197581	0.00683789	0.268905	0.251139	0.3419	0.474246	0.466329	0.296635	0.233909	0.282843	0.133663
TCGA-BR-8364-01A	0.346215	0.349065	0.285583	0.42983	0.525076	0.507671	0.484806	0.516243	0.413491	0.379985	0.32045	0.396474	0.398769	0.419215	0.343066	0.472054	0.377937	0.318968	0.110997	0.409472	0.31101	0.293785	0.256849	0.287721	0.407511	0.270888	0.386367	0.427895	0.340863	0.350585	0.470691	0.456743	0.290536	0.265785	0.349285	0.452231	0.160114	0.340447	0.212509	0.0770717	0.2576	0.236483	0.374577	0.447683	0.407206	0.298322	0.2601	0.286254	0.222595
TCGA-BR-8365-01A	0.360029	0.348621	0.301674	0.438986	0.514578	0.508039	0.47725	0.507071	0.415363	0.385416	0.319026	0.399162	0.412457	0.418974	0.330634	0.479376	0.363559	0.312418	0.0846265	0.332239	0.300546	0.224334	0.291012	0.279864	0.418459	0.270092	0.397268	0.434085	0.374904	0.330484	0.472008	0.437703	0.276983	0.278152	0.322519	0.453032	0.0994595	0.345252	0.216355	0.0581002	0.265775	0.254448	0.33097	0.435428	0.408479	0.293371	0.212376	0.270318	0.168461
TCGA-BR-8366-01A	0.505884	0.360673	0.435286	0.453328	0.510217	0.45883	0.450881	0.444557	0.440466	0.414411	0.343065	0.417258	0.438072	0.439255	0.452165	0.356747	0.500077	0.372683	0.109751	0.416149	0.335844	0.342581	0.333294	0.367476	0.468676	0.400536	0.405861	0.523211	0.542005	0.39927	0.433244	0.453373	0.357651	0.349332	0.455901	0.304896	0.229712	0.438769	0.23633	0.131285	0.346291	0.335691	0.430815	0.473576	0.439249	0.358398	0.315857	0.303981	0.221016
TCGA-BR-8367-01A	0.289562	0.365212	0.235043	0.442321	0.499926	0.49816	0.44784	0.466146	0.436532	0.403273	0.330505	0.408238	0.421285	0.434922	0.324567	0.437903	0.279459	0.192051	0.0273476	0.354756	0.301244	0.182365	0.165489	0.186943	0.410078	0.213052	0.33083	0.368405	0.314894	0.313072	0.425147	0.458365	0.207316	0.0412504	0.255715	0.431763	0.0900387	0.250577	0.201299	0.0274682	0.179057	0.17989	0.320262	0.440178	0.429145	0.212562	0.142693	0.256219	0.203512
TCGA-BR-8368-01A	0.408835	0.391104	0.305098	0.440883	0.434441	0.458472	0.351079	0.387673	0.454628	0.428379	0.376394	0.431606	0.461719	0.469782	0.387923	0.227518	0.393458	0.157772	0.080524	0.263361	0.273983	0.184915	0.250293	0.277234	0.415226	0.286599	0.318673	0.439128	0.440703	0.330529	0.39442	0.430448	0.214136	0.116816	0.337812	0.249392	0.0892009	0.349984	0.181915	0.0389024	0.243511	0.230882	0.345504	0.442742	0.442273	0.319597	0.232597	0.303639	0.129319
TCGA-BR-8369-01A	0.188017	0.362796	0.0639438	0.436743	0.498316	0.485668	0.417201	0.431265	0.432687	0.406056	0.347174	0.405796	0.431632	0.437559	0.277704	0.411733	0.161789	0.301742	-0.0194465	0.295455	0.293286	0.163832	0.175086	0.0892876	0.323556	0.146832	0.323826	0.298334	0.266691	0.24772	0.421952	0.459238	0.165741	0.201033	0.141647	0.264628	-0.0163436	0.141188	0.181122	0.00402941	0.113157	0.0819864	0.288832	0.406992	0.415966	0.168834	-0.0246198	0.205199	0.106758
TCGA-BR-8371-01A	0.236835	0.332348	0.253513	0.410173	0.498496	0.490595	0.428878	0.483134	0.386801	0.384058	0.299277	0.406189	0.399381	0.415535	0.259433	0.464271	0.240727	0.417338	0.101489	0.281746	0.314007	0.200299	0.213693	0.245447	0.362261	0.246784	0.410146	0.402793	0.327486	0.256026	0.424037	0.390865	0.257322	0.380985	0.208432	0.312481	-0.0629533	0.344002	0.197335	0.0165795	0.220745	0.211023	0.308533	0.37904	0.324493	0.266199	0.179801	0.237589	0.293773
TCGA-BR-8372-01A	0.474545	0.401378	0.397154	0.440947	0.470573	0.49138	0.396168	0.415332	0.462486	0.442388	0.388013	0.445022	0.474316	0.478559	0.451122	0.274243	0.470199	0.204275	0.0859521	0.402242	0.29126	0.307439	0.309961	0.329428	0.462794	0.345902	0.422624	0.500752	0.518097	0.373123	0.402389	0.419105	0.28627	0.0503374	0.394413	0.212073	0.250256	0.393078	0.213422	0.103739	0.302287	0.295252	0.386052	0.452827	0.432971	0.348822	0.283186	0.334901	0.19693
TCGA-BR-8373-01A	0.264372	0.362154	0.262668	0.484311	0.5137	0.494059	0.446038	0.456753	0.442331	0.382887	0.328118	0.391413	0.408108	0.417029	0.325521	0.390124	0.288266	0.151719	0.0640993	0.340349	0.328267	0.17512	0.248459	0.23308	0.403125	0.237581	0.344272	0.356515	0.357252	0.356939	0.423731	0.4496	0.212993	-0.0345464	0.20712	0.338889	0.228648	0.220537	0.195019	0.0508872	0.196792	0.158426	0.35432	0.451654	0.451807	0.283134	0.256468	0.299357	0.177348
TCGA-BR-8380-01A	0.274747	0.363714	0.240421	0.429033	0.522066	0.525759	0.485453	0.511935	0.432886	0.402076	0.337406	0.413346	0.423369	0.434778	0.311123	0.473026	0.277071	0.275995	0.121118	0.32154	0.281144	0.205717	0.232546	0.185484	0.379233	0.209292	0.342558	0.375703	0.287755	0.343347	0.454834	0.417914	0.224073	0.188838	0.238306	0.299412	0.150771	0.254642	0.204261	0.0384055	0.189088	0.162928	0.324061	0.424382	0.406984	0.235963	0.119576	0.279767	0.202606
TCGA-BR-8381-01A	0.487546	0.37618	0.406329	0.452564	0.50237	0.466538	0.447294	0.461685	0.452006	0.437816	0.360945	0.423263	0.460383	0.451765	0.431784	0.298834	0.47467	0.318821	0.119108	0.392944	0.339549	0.318884	0.331983	0.361901	0.426268	0.376221	0.40788	0.521021	0.525924	0.383453	0.402403	0.456412	0.330123	0.356304	0.425634	0.213722	0.0921342	0.434338	0.217886	0.103833	0.317958	0.298456	0.400337	0.484851	0.465374	0.350582	0.283545	0.284095	0.252099
TCGA-BR-8382-01A	0.433434	0.359977	0.354016	0.451381	0.507879	0.496037	0.446128	0.446795	0.441017	0.405674	0.340507	0.410663	0.438617	0.449928	0.432131	0.293939	0.35977	0.149937	0.0420686	0.374091	0.283423	0.186599	0.248204	0.254287	0.433132	0.293555	0.449803	0.464884	0.517018	0.361607	0.413016	0.454192	0.238131	0.0249938	0.396645	0.284215	0.287307	0.310055	0.229721	0.038702	0.229024	0.217948	0.391873	0.447982	0.41954	0.306366	0.19625	0.28661	0.0759137
TCGA-BR-8384-01A	0.372107	0.334639	0.334397	0.417118	0.520076	0.505824	0.479371	0.503113	0.398267	0.369108	0.283365	0.388134	0.388001	0.409038	0.313114	0.48047	0.412193	0.246654	0.149908	0.309925	0.326881	0.243988	0.252535	0.269838	0.417144	0.292834	0.423595	0.443949	0.368931	0.346826	0.47125	0.419348	0.262555	0.140494	0.328133	0.457411	0.0972263	0.353213	0.214498	0.050372	0.252308	0.25074	0.323978	0.436376	0.401846	0.278984	0.260549	0.289902	0.234694
TCGA-BR-8483-01A	0.270124	0.376476	0.113962	0.43259	0.466952	0.478877	0.379859	0.418158	0.438821	0.430328	0.375076	0.420614	0.452058	0.458247	0.320006	0.329509	0.224369	-0.0328059	0.029582	0.293177	0.230783	0.138791	0.124343	0.0864357	0.309073	0.0760343	0.415341	0.273832	0.376914	0.214798	0.360472	0.444389	0.081746	-0.216614	0.203899	0.184657	-0.145768	0.0638495	0.188878	-0.053719	0.0790006	0.0525075	0.275459	0.431423	0.420336	0.19454	0.104494	0.193601	0.133494
TCGA-BR-8484-01A	0.440973	0.381514	0.358465	0.459904	0.467892	0.481599	0.387385	0.454365	0.444807	0.423529	0.361132	0.419203	0.446407	0.447403	0.409533	0.357483	0.415385	0.330287	0.147311	0.429089	0.34628	0.262617	0.303955	0.363805	0.450817	0.339259	0.397468	0.477468	0.479993	0.382814	0.43716	0.433328	0.321586	0.301439	0.345408	0.434616	0.238118	0.39786	0.210615	0.0819677	0.299342	0.260613	0.417513	0.47491	0.452563	0.328296	0.294364	0.293886	0.275354
TCGA-BR-8485-01A	0.419383	0.372624	0.329253	0.484666	0.507678	0.494879	0.432792	0.457378	0.453725	0.410265	0.357445	0.406798	0.438018	0.438547	0.384138	0.379202	0.439531	0.248315	0.0521712	0.337889	0.28204	0.213274	0.245064	0.288012	0.39276	0.303596	0.336654	0.453027	0.435529	0.355129	0.418725	0.448137	0.2744	0.200656	0.377497	0.252869	0.12429	0.365208	0.212033	0.0379049	0.250449	0.220027	0.353377	0.462441	0.458709	0.311998	0.282284	0.296227	0.152392
TCGA-BR-8486-01A	0.405139	0.375271	0.314416	0.447437	0.499216	0.499522	0.429532	0.454719	0.446872	0.432297	0.381212	0.418966	0.45216	0.447295	0.39526	0.357997	0.338061	0.161352	0.121383	0.386007	0.295435	0.256779	0.27788	0.333865	0.41006	0.26882	0.358333	0.451554	0.480207	0.382061	0.43848	0.457562	0.264448	0.107486	0.335728	0.396424	0.196832	0.379796	0.198605	0.0631852	0.267793	0.215588	0.398189	0.487123	0.481762	0.31657	0.264736	0.321514	0.182559
TCGA-BR-8487-01A	0.365401	0.374982	0.294427	0.455966	0.453084	0.48165	0.376633	0.41628	0.443385	0.432835	0.358405	0.432568	0.455805	0.458753	0.388322	0.221857	0.342057	0.0914469	0.0532629	0.361188	0.270025	0.199958	0.225232	0.192359	0.408209	0.249723	0.333214	0.43262	0.434576	0.311475	0.36302	0.437137	0.208376	0.0627617	0.354006	0.220989	0.079783	0.255297	0.185595	0.0213692	0.209704	0.197701	0.328546	0.443509	0.437011	0.266171	0.158478	0.28203	0.073859
TCGA-BR-8588-01A	0.407338	0.363615	0.32541	0.439108	0.516392	0.509014	0.454201	0.476898	0.445053	0.422897	0.352408	0.410704	0.44484	0.441931	0.403809	0.406259	0.428216	0.336438	0.136041	0.376922	0.353079	0.304117	0.302604	0.295319	0.435382	0.301809	0.382057	0.457063	0.417994	0.371383	0.440631	0.450803	0.295709	0.28171	0.396922	0.418506	0.337201	0.367056	0.221923	0.0571351	0.277437	0.241157	0.421526	0.454738	0.437368	0.318999	0.271969	0.308928	0.189602
TCGA-BR-8589-01A	0.503556	0.391518	0.391142	0.438114	0.417982	0.393007	0.236503	0.38042	0.454492	0.455721	0.388132	0.439443	0.47913	0.461676	0.455492	0.167296	0.513373	0.140011	0.14692	0.366081	0.291359	0.253824	0.295059	0.332652	0.447528	0.384809	0.372791	0.521691	0.531422	0.35831	0.366171	0.416918	0.289853	-0.0334527	0.46194	0.267814	0.179124	0.447898	0.210566	0.0756766	0.306395	0.28052	0.379085	0.481104	0.465628	0.335578	0.264273	0.281108	0.240151
TCGA-BR-8590-01A	0.369968	0.361078	0.321882	0.467948	0.51649	0.512809	0.469104	0.478881	0.435969	0.406253	0.340278	0.400749	0.424814	0.442229	0.366857	0.430298	0.373695	0.320465	0.184933	0.401363	0.33083	0.271326	0.278654	0.304297	0.426404	0.304549	0.416438	0.435928	0.385212	0.358235	0.44105	0.461494	0.294166	0.267634	0.313502	0.433599	0.164107	0.357524	0.221896	0.0759932	0.251995	0.213738	0.36102	0.451216	0.414487	0.336526	0.300958	0.324955	0.234602
TCGA-BR-8591-01A	0.434677	0.389934	0.346465	0.456768	0.498445	0.491602	0.423481	0.441252	0.448743	0.422052	0.378421	0.430687	0.449562	0.457515	0.423771	0.325009	0.36158	0.27217	0.0670127	0.367022	0.293064	0.242528	0.287889	0.313451	0.43719	0.286575	0.411011	0.456057	0.496202	0.380885	0.428023	0.454824	0.283987	0.264071	0.355752	0.381161	0.253834	0.325494	0.209505	0.0756223	0.278254	0.247754	0.395028	0.464496	0.458684	0.343728	0.293508	0.316703	0.216928
TCGA-BR-8592-01A	0.313521	0.355423	0.277782	0.424578	0.516519	0.526152	0.477549	0.462044	0.413536	0.388823	0.322881	0.404667	0.401894	0.420993	0.318204	0.475462	0.345565	0.355172	0.137013	0.328608	0.326704	0.282375	0.235572	0.284504	0.40559	0.270385	0.351792	0.41628	0.309092	0.350658	0.462883	0.421795	0.290054	0.346961	0.304733	0.448664	0.128418	0.342106	0.212235	0.0688853	0.247	0.22109	0.350992	0.425179	0.398148	0.264524	0.174963	0.296706	0.223747
TCGA-BR-8676-01A	0.449647	0.383442	0.270111	0.409138	0.42694	0.383381	0.203983	0.368868	0.440731	0.448987	0.392933	0.441501	0.469961	0.459087	0.395216	0.211513	0.448348	-0.0198575	0.0969339	0.308303	0.291058	0.156849	0.114373	0.22437	0.378334	0.275908	0.330844	0.438318	0.484811	0.320553	0.333245	0.40434	0.178663	-0.168985	0.378039	-0.0780913	0.221874	0.363221	0.216319	0.0356652	0.199454	0.219939	0.322249	0.426476	0.430503	0.216696	0.102577	0.216348	0.235342
TCGA-BR-8677-01A	0.45362	0.368012	0.37514	0.451578	0.517965	0.508965	0.426162	0.453957	0.43816	0.413496	0.349516	0.415438	0.437688	0.442659	0.418568	0.390039	0.45427	0.181213	0.112563	0.297355	0.305724	0.258192	0.315395	0.312231	0.429475	0.321836	0.459419	0.503159	0.51259	0.362471	0.448375	0.432999	0.278052	0.0601582	0.412626	0.23623	0.00862497	0.410103	0.210326	0.0455621	0.285422	0.25206	0.389158	0.472006	0.464913	0.348902	0.234381	0.297955	0.20835
TCGA-BR-8678-01A	0.411961	0.399646	0.305543	0.470465	0.488154	0.486143	0.378848	0.371942	0.47364	0.442109	0.385799	0.43442	0.476145	0.461076	0.403314	0.296654	0.400964	0.0611173	0.0461706	0.309273	0.247475	0.135482	0.148697	0.166455	0.370541	0.237789	0.395614	0.370209	0.506816	0.323024	0.362009	0.436419	0.156746	-0.126151	0.28147	0.00668601	0.116583	0.149746	0.219854	0.0200757	0.172091	0.14115	0.309054	0.443597	0.454103	0.293848	0.281939	0.272701	0.150621
TCGA-BR-8679-01A	0.20254	0.3844	0.17235	0.437759	0.49104	0.489799	0.427241	0.437738	0.446039	0.436361	0.378233	0.428025	0.454353	0.448871	0.33548	0.363602	0.159761	0.063465	-0.00786873	0.37566	0.272079	0.156405	0.217003	0.0771632	0.391742	0.175008	0.460869	0.286717	0.346056	0.298307	0.409896	0.451658	0.13473	-0.194416	0.186193	0.113056	0.0698845	0.0367155	0.206441	0.022922	0.142584	0.119013	0.29511	0.444623	0.430315	0.189321	0.0614125	0.232226	0.101425
TCGA-BR-8680-01A	0.212503	0.390728	0.0381804	0.424473	0.452128	0.459373	0.377833	0.375741	0.457744	0.455037	0.394859	0.435999	0.472967	0.464211	0.295712	0.221471	0.183622	0.0724299	-0.00478437	0.303967	0.211984	0.105015	0.104632	0.0404122	0.251318	0.0940126	0.247985	0.272497	0.283072	0.199178	0.299747	0.440917	0.0615713	-0.0409319	0.137279	0.295111	-0.0937904	0.0671652	0.215401	-0.0337284	0.0948704	0.0921558	0.242038	0.393034	0.390935	0.130795	-0.0852566	0.172681	0.11771
TCGA-BR-8682-01A	0.285172	0.341103	0.269528	0.430347	0.497884	0.49804	0.439777	0.461749	0.411375	0.37149	0.296368	0.385002	0.382077	0.415279	0.303975	0.439521	0.298758	0.285202	0.0961231	0.417098	0.299671	0.199449	0.217112	0.255507	0.415833	0.25911	0.326797	0.386693	0.293057	0.340898	0.437411	0.427749	0.256113	0.186927	0.263435	0.441516	0.0762957	0.261996	0.203369	0.050853	0.215569	0.192491	0.343104	0.447796	0.423887	0.233162	0.143315	0.253108	0.230505
TCGA-BR-8683-01A	0.37775	0.365954	0.317162	0.430609	0.523094	0.500032	0.462192	0.458492	0.432966	0.408443	0.347772	0.40339	0.419777	0.424605	0.373105	0.398358	0.355206	0.263729	0.179037	0.357798	0.283477	0.208955	0.298748	0.270867	0.424073	0.309627	0.439052	0.42919	0.452165	0.357717	0.434399	0.460369	0.248845	0.100388	0.297518	0.331569	-0.0107538	0.325923	0.220591	0.0482943	0.256603	0.216428	0.36519	0.47978	0.482041	0.29972	0.27631	0.307551	0.222761
TCGA-BR-8686-01A	0.450136	0.367762	0.355066	0.412636	0.479224	0.464255	0.40488	0.468768	0.433458	0.425885	0.359863	0.41927	0.444458	0.439292	0.40197	0.382479	0.466765	0.342438	0.127085	0.281454	0.305793	0.294631	0.27502	0.300898	0.421739	0.332258	0.356734	0.495642	0.465121	0.356825	0.425146	0.435583	0.313797	0.319827	0.424298	0.468695	0.206267	0.392874	0.205229	0.0662138	0.283216	0.273303	0.391866	0.489042	0.489579	0.324463	0.250312	0.294663	0.310946
TCGA-BR-8687-01A	0.253857	0.364545	0.161326	0.467935	0.475439	0.482251	0.444146	0.441357	0.438573	0.407188	0.344786	0.407264	0.419659	0.438685	0.306455	0.371494	0.222654	0.109725	0.0472508	0.360486	0.254924	0.220508	0.186328	0.149599	0.35783	0.148011	0.312372	0.336486	0.31546	0.257692	0.424196	0.456567	0.165054	-0.0651957	0.200846	0.195904	0.0119658	0.198602	0.186362	0.0207764	0.149565	0.10081	0.298163	0.423438	0.40864	0.212633	0.131882	0.233683	0.0546712
TCGA-BR-8690-01A	0.470779	0.318528	0.356424	0.459021	0.49499	0.501159	0.398604	0.458743	0.41979	0.413068	0.329666	0.401919	0.443066	0.429221	0.404421	0.299798	0.456867	0.0947096	0.101466	0.333024	0.314031	0.232562	0.248175	0.281452	0.351873	0.287718	0.430084	0.494983	0.519016	0.308268	0.343509	0.397586	0.249904	0.031268	0.42509	0.23377	0.130061	0.390325	0.197689	-0.0228298	0.256195	0.218903	0.361915	0.430037	0.408514	0.28858	0.184214	0.266993	0.0685559
TCGA-BR-A44T-01A	0.432789	0.3429	0.358889	0.430916	0.506953	0.49592	0.412212	0.469949	0.409995	0.396177	0.334452	0.408605	0.418628	0.429687	0.364584	0.435967	0.419485	0.524948	0.1458	0.295364	0.333551	0.340303	0.281815	0.371946	0.404197	0.368495	0.358449	0.497512	0.447319	0.313556	0.451804	0.407999	0.358552	0.507564	0.415463	0.364513	-0.00233633	0.473552	0.198247	0.078401	0.314675	0.313648	0.364153	0.440177	0.389268	0.355554	0.29954	0.281926	0.337078
TCGA-BR-A44U-01A	0.263704	0.366996	0.0709683	0.442528	0.488957	0.499189	0.420781	0.43983	0.44652	0.430913	0.365532	0.425759	0.454488	0.445014	0.322655	0.328097	0.176325	-0.0401883	0.0272442	0.312317	0.238098	0.116219	0.18792	0.101825	0.288807	0.0705124	0.42499	0.291111	0.358613	0.245399	0.380354	0.452343	0.0906369	-0.323709	0.236724	0.270091	-0.0213076	0.0941169	0.19561	-0.0565792	0.0919101	0.0134114	0.300382	0.411976	0.40644	0.177098	-0.117847	0.199789	0.0683675
TCGA-BR-A4CR-01A	0.132202	0.398373	0.150506	0.465369	0.442533	0.470194	0.364967	0.363173	0.467001	0.458348	0.386845	0.443446	0.483418	0.459573	0.30026	0.345747	0.146112	0.103084	-0.0304287	0.259664	0.256587	0.0658509	0.0823139	0.0273389	0.251172	0.140845	0.318685	0.230209	0.190374	0.249166	0.35104	0.419335	0.0959157	-0.121212	0.119287	-0.106483	0.130877	0.0470076	0.182939	-0.0346548	0.0709537	0.0615893	0.230412	0.423605	0.450508	0.139906	0.00314054	0.180911	-0.00655117
TCGA-BR-A4CS-01A	0.25642	0.371784	0.196593	0.435502	0.466494	0.497314	0.418581	0.436501	0.432337	0.420675	0.375479	0.417816	0.443019	0.45388	0.338731	0.318917	0.240126	0.01022	0.0508392	0.365339	0.310321	0.193934	0.264079	0.173468	0.327682	0.12422	0.423736	0.340945	0.317949	0.316961	0.415849	0.465384	0.153451	-0.286196	0.259702	0.263591	0.329453	0.135587	0.198223	0.0356444	0.152394	0.0741656	0.348121	0.426652	0.420627	0.231849	0.100123	0.256247	0.21039
TCGA-BR-A4IV-01A	0.257632	0.342292	0.232595	0.41754	0.54104	0.455796	0.510807	0.479282	0.403706	0.38803	0.315279	0.403027	0.397602	0.412022	0.295967	0.481394	0.264241	0.24777	0.11026	0.291135	0.318783	0.164642	0.207286	0.256827	0.37106	0.245073	0.308474	0.374148	0.277526	0.342856	0.476516	0.423132	0.222986	0.179167	0.295406	0.422558	0.0826384	0.273128	0.227817	0.0573835	0.204417	0.17249	0.365325	0.406136	0.397108	0.241439	0.111838	0.253317	0.263052
TCGA-BR-A4J4-01A	0.413043	0.376714	0.324618	0.471272	0.496671	0.439222	0.403261	0.418433	0.443542	0.437085	0.357777	0.437366	0.447846	0.433362	0.40773	0.313731	0.380608	0.237834	0.0504514	0.325551	0.297008	0.21018	0.251575	0.243402	0.435027	0.287858	0.349621	0.426781	0.472644	0.336613	0.398914	0.436802	0.240114	0.0623184	0.333525	0.229373	0.138252	0.29153	0.221358	0.0620532	0.244585	0.240538	0.335912	0.441551	0.430431	0.283514	0.221085	0.222369	0.206595
TCGA-BR-A4J5-01A	0.286583	0.342516	0.256923	0.429943	0.526632	0.526396	0.51543	0.492205	0.421352	0.397163	0.326932	0.401142	0.410715	0.421956	0.329303	0.441152	0.303595	0.231518	0.129213	0.380183	0.289628	0.179539	0.219537	0.249228	0.382	0.238652	0.321937	0.391245	0.30069	0.33767	0.451559	0.448208	0.229127	0.187218	0.301281	0.462128	0.183661	0.271721	0.226776	0.0410889	0.209099	0.162497	0.382253	0.439953	0.434801	0.268144	0.176322	0.245129	0.226292
TCGA-BR-A4J6-01A	0.231925	0.354186	0.166516	0.455271	0.470429	0.497646	0.42289	0.462683	0.415057	0.393134	0.317581	0.409571	0.39962	0.433124	0.270074	0.378367	0.291364	0.167181	-0.000703211	0.317463	0.259399	0.178732	0.228889	0.207491	0.344601	0.155541	0.376526	0.355537	0.226581	0.228874	0.409036	0.421682	0.189432	0.120299	0.285669	0.283914	-0.087342	0.243029	0.197769	-0.00666256	0.183737	0.124408	0.259209	0.410284	0.360966	0.237026	0.169762	0.226484	0.0887414
TCGA-BR-A4J7-01A	0.488305	0.323733	0.31628	0.412499	0.487403	0.504495	0.443026	0.478921	0.381927	0.371906	0.289604	0.388732	0.384394	0.417375	0.35397	0.443932	0.489356	0.178371	0.10476	0.357251	0.275414	0.264612	0.203061	0.273928	0.412599	0.316063	0.388924	0.49454	0.49532	0.331895	0.44227	0.413834	0.272939	0.0699235	0.450772	0.359186	0.0992053	0.423729	0.206265	0.0456329	0.257462	0.229246	0.352757	0.414205	0.364734	0.263659	0.209651	0.271043	0.26162
TCGA-BR-A4J8-01A	0.282216	0.355238	0.172112	0.417599	0.481013	0.518003	0.445847	0.489635	0.42633	0.403559	0.340606	0.414057	0.422619	0.441088	0.332078	0.411202	0.279421	0.182349	0.0534729	0.331351	0.248594	0.198919	0.159211	0.141975	0.367923	0.163302	0.375071	0.354584	0.324384	0.289342	0.407583	0.434993	0.175194	0.0796151	0.271168	0.34815	0.0273598	0.174087	0.188047	-0.00672951	0.154442	0.117056	0.31828	0.436472	0.454637	0.170778	0.082319	0.252493	0.146081
TCGA-BR-A4J9-01A	0.288204	0.335895	0.272298	0.430666	0.512042	0.490626	0.476296	0.501406	0.397826	0.374026	0.292897	0.399845	0.388927	0.40905	0.281549	0.478371	0.275769	0.345631	0.0803695	0.289362	0.30813	0.211168	0.258246	0.234103	0.367362	0.244915	0.33698	0.41875	0.347449	0.303916	0.450576	0.400768	0.248152	0.322196	0.260511	0.267735	0.00935162	0.318069	0.204801	0.0187534	0.222786	0.194336	0.323802	0.387507	0.359572	0.271661	0.188118	0.260968	0.236567
TCGA-BR-A4PF-01A	0.439367	0.394074	0.378735	0.462273	0.4282	0.480757	0.371681	0.419065	0.455485	0.44884	0.392479	0.435116	0.46717	0.450778	0.423745	0.283008	0.431257	0.119354	0.0544777	0.415186	0.34642	0.220183	0.215568	0.294896	0.447526	0.348302	0.424938	0.451449	0.497622	0.388769	0.378513	0.398676	0.257987	-0.114513	0.346547	0.241785	0.387356	0.373068	0.217989	0.0773871	0.247902	0.244518	0.350138	0.455445	0.443575	0.282252	0.25124	0.305112	0.195149
TCGA-BR-A4QL-01A	0.365036	0.390004	0.245758	0.442054	0.448563	0.473515	0.35958	0.400964	0.452122	0.42612	0.384473	0.438404	0.46694	0.478286	0.376022	0.222591	0.383036	-0.0302796	0.122603	0.308826	0.256719	0.185808	0.180691	0.201704	0.388938	0.19211	0.324003	0.391707	0.38602	0.268951	0.338979	0.401451	0.157432	-0.0970972	0.341775	0.043514	-0.0758279	0.248044	0.175594	-0.0352816	0.171802	0.155698	0.306614	0.407892	0.394723	0.235164	0.0922164	0.259028	0.0349863
TCGA-CD-5798-01A	0.295078	0.33084	0.257887	0.414971	0.534757	0.511373	0.496454	0.478943	0.416779	0.384096	0.29839	0.393439	0.408597	0.435176	0.338428	0.437638	0.348942	0.137419	0.0554546	0.386771	0.301844	0.240845	0.289839	0.191995	0.403614	0.227902	0.397964	0.384646	0.272979	0.354021	0.448343	0.465677	0.212412	-0.159778	0.302824	0.344635	0.260882	0.278327	0.203261	0.0536919	0.21593	0.167635	0.378299	0.432788	0.39466	0.290286	0.190799	0.263214	0.21282
TCGA-CD-5799-01A	0.233657	0.375902	0.0888876	0.442557	0.510644	0.487442	0.436685	0.423881	0.449343	0.425952	0.366286	0.420634	0.45909	0.46756	0.327851	0.315731	0.234897	0.0178941	-0.0391238	0.359215	0.27064	0.162289	0.197067	0.126566	0.375215	0.0581601	0.381294	0.28423	0.222291	0.291633	0.380247	0.465704	0.123789	-0.135501	0.255588	0.210489	0.18888	0.0554349	0.191465	-0.0210522	0.140168	0.0884291	0.349664	0.433423	0.437211	0.214105	0.0102822	0.243437	0.186214
TCGA-CD-5800-01A	0.230289	0.375613	0.163316	0.441236	0.480076	0.463652	0.402605	0.40043	0.450025	0.428335	0.379765	0.414041	0.461449	0.462525	0.334652	0.308823	0.307182	0.19398	0.0336164	0.383618	0.299388	0.186059	0.216355	0.195551	0.219279	0.132314	0.417473	0.360456	0.264254	0.297447	0.359937	0.455922	0.196123	0.153083	0.218546	0.178753	0.164917	0.186153	0.194484	-0.0279796	0.168582	0.102181	0.347471	0.453617	0.449372	0.267126	0.139041	0.258456	0.154476
TCGA-CD-5801-01A	0.511987	0.362459	0.41246	0.427493	0.458912	0.431507	0.394045	0.427419	0.437653	0.428859	0.353515	0.416828	0.456998	0.451831	0.416261	0.208006	0.518951	0.189428	0.0938982	0.331431	0.279285	0.293382	0.347235	0.350119	0.430956	0.334027	0.395148	0.525467	0.524534	0.327133	0.378155	0.419251	0.302391	0.0462178	0.454443	0.257671	0.170402	0.453993	0.185168	0.074173	0.319462	0.285111	0.40039	0.451839	0.432426	0.347793	0.252357	0.259911	0.242675
TCGA-CD-5803-01A	0.485008	0.357034	0.41527	0.435817	0.529136	0.469393	0.48972	0.468675	0.43247	0.409383	0.339702	0.40123	0.435773	0.447457	0.414218	0.419448	0.495513	0.395563	0.154168	0.340554	0.3275	0.322971	0.377028	0.384527	0.452193	0.364034	0.501264	0.521879	0.491204	0.386323	0.449248	0.45582	0.357298	0.312768	0.409418	0.324399	0.18621	0.472721	0.213328	0.0886195	0.353319	0.339451	0.415031	0.472756	0.437735	0.379648	0.321855	0.312121	0.276764
TCGA-CD-5804-01A	0.348406	0.35238	0.274458	0.431792	0.519353	0.503661	0.44871	0.460541	0.429761	0.419884	0.356887	0.403861	0.44209	0.451789	0.365836	0.392025	0.36821	0.181142	0.131126	0.435018	0.319996	0.240167	0.276995	0.264166	0.386136	0.248509	0.441136	0.429756	0.380957	0.351443	0.432204	0.47281	0.239577	0.0736618	0.329326	0.220195	0.300883	0.291903	0.208382	0.048422	0.245534	0.209288	0.399481	0.453581	0.432891	0.272857	0.153687	0.267142	0.22047
TCGA-CD-5813-01A	0.416518	0.341005	0.365318	0.429119	0.522673	0.482149	0.490888	0.46752	0.425583	0.407164	0.340158	0.39191	0.432054	0.441857	0.370547	0.418211	0.445864	0.364946	0.143744	0.402402	0.314356	0.29395	0.29062	0.34606	0.40171	0.336325	0.386924	0.486847	0.413787	0.374339	0.471969	0.428747	0.308932	0.320801	0.349187	0.349998	0.266119	0.413733	0.217075	0.0718481	0.294225	0.251032	0.422218	0.470769	0.44563	0.323205	0.236677	0.276378	0.316307
TCGA-CD-8524-01A	0.377237	0.354936	0.272835	0.423952	0.495087	0.492065	0.425	0.42225	0.42964	0.405308	0.333641	0.405785	0.421269	0.440721	0.355769	0.374538	0.365476	0.227047	0.0702079	0.340927	0.289631	0.221896	0.239207	0.239521	0.383894	0.253317	0.402485	0.422359	0.442599	0.277228	0.420014	0.460842	0.225356	0.107211	0.308576	0.3037	0.0314451	0.308596	0.205912	0.0412276	0.225807	0.170539	0.333755	0.437213	0.417017	0.257411	0.159341	0.242831	0.148732
TCGA-CD-8525-01A	0.424468	0.363829	0.330244	0.473909	0.501669	0.498446	0.389958	0.439454	0.442312	0.419665	0.367776	0.410697	0.455622	0.460706	0.413815	0.32154	0.447384	0.277284	0.124808	0.374866	0.277517	0.19328	0.250771	0.303391	0.364078	0.278586	0.469004	0.476731	0.463778	0.354037	0.396534	0.466213	0.268422	0.311996	0.387117	0.303799	0.258628	0.316039	0.206092	0.0425947	0.269904	0.23863	0.424186	0.458224	0.454724	0.358114	0.280571	0.314765	0.146192
TCGA-CD-8526-01A	0.396779	0.382024	0.313981	0.466937	0.486044	0.488848	0.419233	0.444623	0.457848	0.425854	0.372288	0.418023	0.460418	0.457007	0.379381	0.355065	0.37425	0.235882	0.0624397	0.350234	0.300805	0.211756	0.266579	0.303453	0.365014	0.271299	0.453441	0.442573	0.45682	0.342559	0.408781	0.4461	0.249236	0.277414	0.332441	0.3021	0.148661	0.328367	0.204081	0.0226242	0.264614	0.222847	0.365699	0.465542	0.467942	0.32264	0.214184	0.257042	0.175302
TCGA-CD-8527-01A	0.342369	0.355985	0.225851	0.43607	0.488399	0.441025	0.384203	0.358442	0.436411	0.406543	0.348193	0.405678	0.449995	0.44854	0.346186	0.305742	0.367498	0.0736757	0.00965892	0.361924	0.291436	0.206946	0.235932	0.154934	0.341896	0.188412	0.418942	0.409605	0.417272	0.260467	0.3828	0.448238	0.164684	-0.134363	0.299613	0.294476	0.119358	0.255889	0.192988	-0.0473115	0.180457	0.137364	0.294639	0.42285	0.397937	0.272908	0.1226	0.248353	0.118744
TCGA-CD-8528-01A	0.321916	0.397645	0.274961	0.457201	0.48741	0.487629	0.439214	0.420745	0.462573	0.442077	0.38665	0.428986	0.469484	0.463297	0.368909	0.263654	0.292903	0.0253024	0.0434534	0.374209	0.262254	0.137662	0.218103	0.170175	0.37876	0.213066	0.316937	0.349666	0.34887	0.316077	0.373651	0.456489	0.159844	-0.311454	0.271947	0.200977	0.312876	0.17205	0.21766	0.0396065	0.1906	0.180333	0.290214	0.43491	0.425402	0.252953	0.125197	0.240392	0.0316437
TCGA-CD-8529-01A	0.431109	0.358919	0.376224	0.460533	0.524988	0.501577	0.452951	0.464523	0.438156	0.407171	0.340863	0.400664	0.427301	0.440568	0.401599	0.382532	0.414628	0.380648	0.213078	0.443557	0.332865	0.31638	0.360174	0.348951	0.416825	0.346293	0.391185	0.481987	0.469715	0.387739	0.438453	0.475043	0.348221	0.376454	0.358629	0.394784	0.215568	0.385524	0.223688	0.0908333	0.321478	0.280027	0.425144	0.477466	0.450329	0.363153	0.297161	0.308534	0.319261
TCGA-CD-8530-01A	0.284302	0.347684	0.24147	0.431707	0.523415	0.509089	0.467678	0.470149	0.421673	0.404941	0.332054	0.400818	0.424585	0.433915	0.333628	0.430868	0.309299	0.231082	0.136907	0.341621	0.285785	0.180029	0.185093	0.212562	0.394731	0.22394	0.360968	0.392297	0.30759	0.334875	0.453472	0.461239	0.207616	0.111277	0.271543	0.491162	0.139897	0.273075	0.209106	0.0661564	0.187127	0.145028	0.371945	0.431502	0.430692	0.21798	0.111337	0.224581	0.250427
TCGA-CD-8531-01A	0.271128	0.407052	0.264709	0.483382	0.484113	0.287387	0.414529	0.342029	0.457478	0.462518	0.404181	0.446588	0.485771	0.47948	0.365924	0.253027	0.238602	0.330067	-0.0224943	0.464086	0.301043	0.230015	0.256192	0.267412	0.320432	0.154062	0.255984	0.377085	0.312393	0.330214	0.36453	0.411854	0.260727	0.259875	0.220557	0.17713	0.0469797	0.19291	0.180943	0.101303	0.205073	0.129153	0.318983	0.458202	0.420674	0.301402	0.0933782	0.257489	0.233651
TCGA-CD-8532-01A	0.454161	0.366473	0.340458	0.433484	0.481685	0.492462	0.402164	0.456933	0.429743	0.420641	0.355861	0.411294	0.44288	0.454058	0.390534	0.35325	0.440355	0.292612	0.166442	0.371232	0.287621	0.250494	0.357179	0.347429	0.446189	0.335307	0.407255	0.493284	0.499831	0.354633	0.427722	0.441524	0.32169	0.287041	0.353583	0.42517	0.0782786	0.424484	0.202312	0.0878644	0.319268	0.303491	0.38843	0.459998	0.439465	0.36467	0.323945	0.317371	0.288452
TCGA-CD-8533-01A	0.153326	0.393495	0.053872	0.455747	0.434001	0.438285	0.395682	0.366106	0.459572	0.459655	0.383307	0.422088	0.480078	0.45585	0.274085	0.327807	0.170081	0.0315559	0.00790809	0.287593	0.245643	0.18804	0.117323	0.079991	0.259185	0.113556	0.306858	0.25256	0.227509	0.21454	0.338719	0.418178	0.111829	-0.0746404	0.122753	0.191671	-0.0683291	0.0884759	0.171034	-0.0413267	0.099275	0.0760316	0.20418	0.406386	0.409821	0.115142	-0.121029	0.163416	0.111728
TCGA-CD-8534-01A	0.302271	0.369602	0.208105	0.403346	0.464928	0.46232	0.363862	0.405527	0.424709	0.423886	0.362354	0.406214	0.443256	0.450893	0.337671	0.382763	0.268166	0.228809	0.105608	0.376274	0.307053	0.213998	0.178074	0.199467	0.390344	0.218277	0.400769	0.406323	0.372902	0.300292	0.398923	0.412808	0.2189	0.144647	0.275025	0.415884	0.0447251	0.267631	0.185663	0.0144476	0.183377	0.157385	0.3273	0.432056	0.407142	0.25058	0.159744	0.262775	0.233548
TCGA-CD-8535-01A	0.220161	0.39321	0.242713	0.474788	0.45263	0.476305	0.341594	0.37777	0.470476	0.440612	0.390174	0.42583	0.463101	0.455486	0.306007	0.282657	0.214869	0.00264939	0.0697904	0.336567	0.23169	0.10285	0.0819243	0.0175371	0.327969	0.157644	0.384793	0.225229	0.279283	0.233028	0.354169	0.465756	0.0777411	-0.228552	0.0972146	-0.041889	-0.122846	-0.0385066	0.218504	-0.0127687	0.07192	0.0780825	0.181198	0.422933	0.431933	0.187521	0.248806	0.233024	0.0873954
TCGA-CD-A486-01A	0.260392	0.366523	0.245387	0.460998	0.50176	0.490599	0.427784	0.419356	0.434201	0.406906	0.368407	0.411943	0.435065	0.442611	0.332322	0.310494	0.239757	0.052068	0.118799	0.417378	0.325858	0.174149	0.254487	0.2359	0.325914	0.174167	0.408843	0.349	0.325089	0.337519	0.378724	0.465731	0.193892	0.0586189	0.211947	0.0395078	0.173105	0.155109	0.205582	0.0300773	0.20598	0.158722	0.33244	0.441237	0.423597	0.31506	0.185546	0.254891	0.150332
TCGA-CD-A487-01A	0.252234	0.375442	0.159287	0.470551	0.509999	0.469301	0.458915	0.469666	0.453746	0.437748	0.375829	0.431952	0.46358	0.453826	0.337279	0.385817	0.276744	0.0392581	0.0418868	0.312925	0.323594	0.0853932	0.16887	0.124323	0.4006	0.117569	0.443978	0.372597	0.326905	0.290398	0.393437	0.459414	0.121523	-0.358457	0.244867	0.446126	0.334442	0.134338	0.22493	-0.00743018	0.119999	0.081435	0.298516	0.41452	0.415589	0.217131	0.102758	0.260278	0.131693
TCGA-CD-A489-01A	0.330069	0.34133	0.22247	0.442727	0.520049	0.468935	0.476665	0.421042	0.412582	0.386823	0.303742	0.39908	0.39868	0.419466	0.325248	0.448855	0.352968	0.324541	0.0809884	0.342747	0.302276	0.202639	0.220778	0.205376	0.374872	0.247752	0.403679	0.430697	0.363699	0.300278	0.455102	0.440149	0.239137	0.25251	0.317328	0.364288	0.0599638	0.335344	0.220131	0.0376576	0.212713	0.19354	0.349331	0.403037	0.369501	0.233212	0.147814	0.258294	0.269397
TCGA-CD-A48A-01A	0.280124	0.354	0.232026	0.365055	0.465485	0.466779	0.339989	0.406513	0.42221	0.421848	0.355925	0.405152	0.441533	0.446253	0.312671	0.327219	0.202204	0.0735432	0.0117633	0.376417	0.319297	0.202819	0.133664	0.097725	0.365999	0.213828	0.392712	0.316114	0.379385	0.245867	0.366236	0.439265	0.137815	-0.0245994	0.188673	0.0431535	0.0559753	0.0729428	0.186844	-0.0681753	0.144179	0.165809	0.271855	0.406734	0.376172	0.199758	0.131256	0.218812	0.063257
TCGA-CD-A48C-01A	0.366012	0.375782	0.279778	0.472538	0.495631	0.49281	0.430898	0.423698	0.453736	0.443135	0.375637	0.42665	0.463981	0.462723	0.389985	0.34228	0.369368	0.220667	0.0835415	0.395257	0.250996	0.176095	0.233258	0.211797	0.385646	0.223879	0.327651	0.409079	0.435095	0.314377	0.419673	0.455333	0.208301	0.0461431	0.299856	0.282525	0.0599378	0.264289	0.212092	0.0391855	0.210775	0.168176	0.358214	0.440719	0.431295	0.248146	0.145184	0.255167	0.108279
TCGA-CD-A4MG-01A	0.27313	0.380081	0.281509	0.460762	0.496102	0.507597	0.444174	0.459418	0.446754	0.429948	0.371361	0.425436	0.455406	0.459128	0.36168	0.294083	0.251248	0.324568	0.0948791	0.418404	0.27547	0.193485	0.235417	0.216836	0.405275	0.252502	0.355421	0.374314	0.308877	0.345945	0.400206	0.444487	0.226913	0.261073	0.278565	0.271556	0.210278	0.249148	0.193525	0.0415	0.218124	0.201011	0.379591	0.433131	0.426166	0.279795	0.180648	0.281182	0.216067
TCGA-CD-A4MH-01A	0.284233	0.377081	0.217584	0.469756	0.448865	0.481039	0.391585	0.435638	0.450271	0.43412	0.387047	0.429318	0.460449	0.442862	0.336153	0.330342	0.301201	0.125952	0.186085	0.255433	0.313609	0.17297	0.186123	0.215669	0.352572	0.222307	0.313608	0.37381	0.377251	0.312446	0.388801	0.408356	0.195168	0.0890947	0.245357	0.331415	0.133491	0.255308	0.196243	0.0192585	0.193421	0.159387	0.334778	0.442381	0.448439	0.218724	0.0777864	0.248866	0.114783
TCGA-CG-4301-01A	0.329273	0.365665	0.286359	0.468953	0.501308	0.494886	0.44868	0.458698	0.43287	0.409735	0.337472	0.413006	0.417358	0.42487	0.363361	0.398153	0.255921	0.197469	0.0933582	0.412047	0.344654	0.299372	0.29266	0.269948	0.417614	0.25838	0.420415	0.394206	0.422909	0.371207	0.448439	0.464999	0.241527	0.0307459	0.274091	0.46374	0.220424	0.299672	0.23269	0.103684	0.244841	0.196109	0.378418	0.447074	0.434218	0.312712	0.268483	0.279673	0.142152
TCGA-CG-4304-01A	0.375137	0.366157	0.32243	0.42437	0.487967	0.495509	0.456194	0.453447	0.429014	0.41576	0.34057	0.41	0.429297	0.440264	0.372337	0.34604	0.348863	0.27517	0.176777	0.374783	0.398765	0.232432	0.257096	0.288832	0.437543	0.302828	0.360185	0.454919	0.436002	0.398506	0.41897	0.43583	0.279112	0.263025	0.319984	0.382347	0.39763	0.337474	0.189593	0.0981945	0.24697	0.216735	0.410299	0.460068	0.462917	0.277731	0.215362	0.284252	0.22002
TCGA-CG-4305-01A	0.460713	0.376163	0.380783	0.452907	0.493609	0.503219	0.445242	0.451785	0.444997	0.420007	0.361257	0.41137	0.436785	0.442905	0.415578	0.338182	0.450987	0.313132	0.113424	0.378811	0.339723	0.320572	0.324924	0.310493	0.451978	0.353128	0.343606	0.490107	0.491752	0.371339	0.416904	0.443271	0.307562	0.22612	0.42587	0.36774	0.296805	0.387161	0.203066	0.0685034	0.316232	0.317189	0.365576	0.458322	0.424607	0.329374	0.272979	0.285603	0.24877
TCGA-CG-4306-01A	0.385606	0.385345	0.329976	0.433611	0.489343	0.502122	0.451497	0.446347	0.450228	0.425675	0.364078	0.428731	0.449182	0.446275	0.422706	0.326178	0.387791	0.254788	0.14031	0.38004	0.367413	0.20193	0.2795	0.245978	0.447998	0.297439	0.40098	0.443104	0.43256	0.394016	0.428101	0.455372	0.253837	0.19348	0.368188	0.398501	0.407505	0.313889	0.216415	0.101942	0.243911	0.213618	0.394083	0.467391	0.466951	0.310351	0.283605	0.302306	0.178827
TCGA-CG-4436-01A	0.37838	0.397384	0.259086	0.440908	0.436857	0.470841	0.370172	0.39116	0.460293	0.448692	0.390009	0.441681	0.468558	0.452045	0.405061	0.257492	0.369565	0.00547041	0.126407	0.32656	0.369223	0.129931	0.216819	0.252709	0.433566	0.194361	0.344763	0.418984	0.470871	0.374748	0.388065	0.442469	0.188718	-0.153435	0.278368	0.153047	0.428103	0.284978	0.189972	0.0697267	0.191792	0.13045	0.376987	0.4488	0.456091	0.251295	0.188941	0.287023	0.15873
TCGA-CG-4437-01A	0.448463	0.367645	0.388202	0.447884	0.502721	0.494731	0.442787	0.44549	0.437236	0.428287	0.367283	0.410328	0.455316	0.462989	0.412608	0.297406	0.451415	0.279984	0.0955784	0.379989	0.327437	0.278076	0.253778	0.281764	0.458413	0.302462	0.424331	0.477121	0.464684	0.388435	0.414398	0.467725	0.291219	0.264217	0.393631	0.370557	0.353899	0.338686	0.218284	0.0732129	0.268454	0.239051	0.418229	0.473645	0.452117	0.326701	0.321382	0.329826	0.275487
TCGA-CG-4438-01A	0.476886	0.375769	0.381005	0.471508	0.489924	0.472976	0.388931	0.399486	0.452461	0.43313	0.368657	0.428212	0.448693	0.440389	0.424777	0.332482	0.438806	0.14328	0.093975	0.401347	0.312043	0.239491	0.276857	0.287128	0.433489	0.349981	0.421148	0.493289	0.530898	0.357668	0.40372	0.440441	0.273843	-0.0412181	0.393898	0.229081	0.159426	0.374112	0.203797	0.0517285	0.299265	0.301937	0.318701	0.4447	0.445988	0.32318	0.261995	0.291597	0.192843
TCGA-CG-4440-01A	0.276503	0.39728	0.229086	0.390476	0.467733	0.473473	0.393442	0.405465	0.452942	0.459532	0.398351	0.446688	0.475027	0.463381	0.378694	0.280447	0.326886	0.0571266	0.0238211	0.373803	0.301398	0.176933	0.22808	0.19362	0.352034	0.214154	0.421288	0.376057	0.376199	0.343371	0.399888	0.451884	0.172746	-0.183165	0.2832	0.375834	0.332893	0.12847	0.205061	0.0360507	0.206675	0.194338	0.318636	0.439109	0.449646	0.253669	0.0761769	0.235815	0.122162
TCGA-CG-4441-01A	0.391916	0.3774	0.319272	0.423173	0.504214	0.501583	0.463534	0.455201	0.441607	0.424036	0.362861	0.418021	0.447417	0.458588	0.395559	0.324657	0.335126	0.130543	0.0401773	0.380798	0.328311	0.19795	0.279166	0.256837	0.432705	0.228804	0.38257	0.419427	0.440485	0.381333	0.413815	0.479057	0.236505	0.0437366	0.317438	0.220876	0.373847	0.254795	0.199906	0.0654363	0.24838	0.236295	0.39504	0.468789	0.466736	0.310131	0.252072	0.301771	0.226774
TCGA-CG-4442-01A	0.388097	0.392276	0.276559	0.480054	0.498059	0.45616	0.416883	0.342863	0.458065	0.427401	0.374076	0.437725	0.447867	0.45445	0.391083	0.23633	0.302603	0.0588547	0.0896495	0.320162	0.31427	0.119614	0.243599	0.165913	0.387027	0.197768	0.396181	0.389114	0.461532	0.329404	0.391578	0.459644	0.154259	-0.149154	0.30441	0.105949	0.295714	0.173376	0.20923	0.0321261	0.179011	0.170029	0.322316	0.419008	0.437048	0.25845	0.121652	0.226756	0.0695262
TCGA-CG-4443-01A	0.0748175	0.378734	0.132842	0.454691	0.450329	0.460664	0.298562	0.393827	0.43179	0.410632	0.340496	0.425182	0.424379	0.450107	0.205006	0.280824	0.0316625	-0.068258	0.0606912	0.266098	0.239307	0.0193433	0.0674456	-0.0433937	0.183983	0.0980089	0.196373	0.14734	0.232357	0.22018	0.359162	0.430775	0.0218271	-0.333675	0.0175658	-0.232803	0.0184284	-0.097034	0.164006	-0.0233874	0.0257563	0.0253081	0.141678	0.389112	0.399256	0.137355	0.0679114	0.163865	0.1097
TCGA-CG-4444-01A	0.326288	0.390545	0.309906	0.472556	0.492962	0.486245	0.402307	0.421896	0.455783	0.430466	0.379528	0.428608	0.448828	0.453777	0.384165	0.34716	0.315902	0.293038	0.105886	0.406092	0.343297	0.20946	0.245353	0.281874	0.435118	0.307417	0.407685	0.418936	0.366996	0.39131	0.430747	0.415352	0.263324	0.245075	0.297458	0.390188	0.334463	0.315632	0.20178	0.0874315	0.252401	0.23504	0.386497	0.441228	0.443685	0.271515	0.20439	0.292963	0.245353
TCGA-CG-4460-01A	0.344547	0.386497	0.294229	0.462625	0.472164	0.478159	0.386811	0.39324	0.454941	0.433861	0.363622	0.431494	0.45211	0.451263	0.372093	0.347004	0.351363	0.16874	0.0122469	0.376792	0.294138	0.130939	0.217708	0.197296	0.408281	0.214618	0.340088	0.396525	0.423856	0.340422	0.411438	0.455509	0.210104	0.0440087	0.287154	0.296377	0.2311	0.202495	0.208741	0.0451646	0.208521	0.160586	0.365129	0.430329	0.447753	0.253441	0.254964	0.272518	0.0953774
TCGA-CG-4462-01A	0.337066	0.349621	0.309619	0.44483	0.516589	0.518062	0.515671	0.505435	0.418609	0.387709	0.312582	0.397946	0.397705	0.422038	0.361981	0.429449	0.311963	0.159974	0.0959422	0.431859	0.464242	0.195534	0.282012	0.29825	0.454086	0.289274	0.33388	0.399099	0.377147	0.440577	0.475024	0.467047	0.264347	-0.114108	0.294118	0.460977	0.484597	0.270959	0.228426	0.132943	0.261694	0.221186	0.423897	0.466151	0.45126	0.308754	0.293283	0.324039	0.213374
TCGA-CG-4465-01A	0.407794	0.389924	0.347667	0.469421	0.484106	0.490666	0.452283	0.412112	0.45751	0.434216	0.380476	0.431775	0.456673	0.456299	0.418718	0.306491	0.345108	0.116475	0.051822	0.429425	0.335577	0.234837	0.296597	0.275625	0.446906	0.303088	0.448213	0.431506	0.462523	0.397155	0.413561	0.44626	0.249234	-0.0802931	0.339373	0.272043	0.33479	0.307525	0.209702	0.0991683	0.262645	0.232966	0.368064	0.457577	0.438375	0.305619	0.223845	0.308606	0.108485
TCGA-CG-4466-01A	0.337855	0.391758	0.139705	0.456758	0.447331	0.464972	0.355427	0.389528	0.457518	0.440864	0.381849	0.424404	0.46376	0.458381	0.35153	0.245291	0.238661	-0.0191526	0.00323398	0.239737	0.323351	0.0907719	0.109592	0.0832207	0.313028	0.0956381	0.268468	0.336929	0.435643	0.300452	0.384358	0.437619	0.0895875	-0.191534	0.252657	-0.181371	0.252501	0.165672	0.192158	0.00869812	0.0901662	0.0539569	0.328669	0.404745	0.448666	0.152766	0.0783502	0.225099	-0.00188939
TCGA-CG-4469-01A	0.303471	0.393042	0.264305	0.427939	0.438102	0.476264	0.317492	0.384188	0.450627	0.435722	0.37812	0.429077	0.454332	0.460426	0.388265	0.226685	0.234243	0.00902388	0.0375319	0.392314	0.359093	0.201901	0.249422	0.232516	0.412648	0.23264	0.377772	0.384337	0.388595	0.394351	0.406463	0.41632	0.190138	-0.186411	0.246264	-0.00885091	0.374769	0.219473	0.199921	0.0794693	0.204433	0.147775	0.359188	0.452083	0.447755	0.252117	0.138237	0.260307	0.188867
TCGA-CG-4475-01A	0.20519	0.380501	0.211858	0.467258	0.521782	0.52629	0.48578	0.478468	0.454227	0.434297	0.364635	0.430253	0.43734	0.43683	0.344258	0.405531	0.19328	0.103033	0.0846827	0.388055	0.389697	0.16779	0.23551	0.210892	0.383737	0.168998	0.339562	0.322638	0.275839	0.382101	0.444613	0.482182	0.175987	-0.190102	0.210091	0.41725	0.379657	0.188239	0.218362	0.0797339	0.187095	0.142772	0.378381	0.43864	0.452651	0.26344	0.210224	0.252641	0.173474
TCGA-CG-4476-01A	0.33822	0.369286	0.299532	0.417687	0.498877	0.50635	0.434364	0.464097	0.433926	0.417682	0.347295	0.411938	0.428313	0.441016	0.357929	0.427547	0.37723	0.327026	0.0910655	0.402585	0.354038	0.239242	0.242974	0.29224	0.436778	0.306158	0.370488	0.439403	0.332113	0.365189	0.454993	0.431875	0.29006	0.248308	0.319284	0.482948	0.284689	0.35734	0.212397	0.0968419	0.254694	0.233487	0.388714	0.454859	0.446494	0.30463	0.280939	0.306633	0.302019
TCGA-CG-4477-01A	0.455639	0.385051	0.407232	0.433992	0.481878	0.494146	0.440864	0.431223	0.461798	0.425224	0.364958	0.421325	0.451548	0.445659	0.445771	0.353668	0.432169	0.265733	0.108455	0.352791	0.379416	0.231816	0.286137	0.317349	0.464558	0.361696	0.447415	0.497062	0.515485	0.407853	0.424193	0.45662	0.303552	0.23497	0.4029	0.278721	0.370782	0.38147	0.234798	0.100971	0.311249	0.287797	0.40423	0.466148	0.454323	0.343417	0.366864	0.353714	0.167646
TCGA-CG-5716-01A	0.283809	0.356184	0.301817	0.433616	0.464018	0.451311	0.34793	0.413711	0.436131	0.417984	0.341616	0.400262	0.445477	0.457636	0.330374	0.342452	0.343498	0.388288	0.188149	0.308582	0.298917	0.238795	0.185311	0.309158	0.419205	0.269435	0.35202	0.42882	0.265987	0.331999	0.424836	0.433508	0.282799	0.41181	0.285815	0.440701	0.245867	0.365707	0.188154	0.0790803	0.239077	0.217679	0.385089	0.444991	0.430715	0.282664	0.284265	0.257491	0.296511
TCGA-CG-5717-01A	0.402836	0.357369	0.354067	0.452243	0.477804	0.490925	0.415006	0.435687	0.429451	0.40471	0.319185	0.403972	0.4227	0.435301	0.371501	0.372368	0.40798	0.367709	0.132943	0.366853	0.349579	0.332418	0.286054	0.29932	0.421089	0.316278	0.467322	0.459091	0.428855	0.376881	0.433789	0.470771	0.294541	0.304704	0.342483	0.45037	0.294104	0.366373	0.220436	0.0921958	0.298619	0.273775	0.376665	0.46596	0.436941	0.333568	0.352738	0.323181	0.271131
TCGA-CG-5718-01A	0.394753	0.364653	0.300603	0.417727	0.490386	0.478967	0.427351	0.423937	0.438785	0.424024	0.363762	0.406617	0.45245	0.460879	0.379031	0.292575	0.368221	0.106958	0.0333395	0.356278	0.363621	0.255361	0.281667	0.290374	0.406392	0.237709	0.406484	0.445262	0.422509	0.369854	0.417598	0.474435	0.24347	0.123129	0.32209	0.3656	0.407027	0.30176	0.19331	0.0640068	0.23954	0.166049	0.41608	0.475965	0.453016	0.328576	0.274654	0.296934	0.182413
TCGA-CG-5719-01A	0.295367	0.349049	0.253062	0.43408	0.531138	0.517828	0.484337	0.485457	0.426931	0.406736	0.328547	0.40342	0.430759	0.446348	0.350175	0.400009	0.317432	0.149622	0.17042	0.436873	0.320555	0.209905	0.268999	0.249406	0.416037	0.194027	0.400452	0.402903	0.265263	0.36938	0.448583	0.476898	0.233209	0.090648	0.316061	0.357119	0.292774	0.275214	0.198263	0.0633356	0.215532	0.142055	0.396997	0.455541	0.435964	0.292704	0.211457	0.265824	0.188123
TCGA-CG-5720-01A	0.385608	0.3672	0.338505	0.428984	0.483763	0.49154	0.415147	0.443164	0.440913	0.421579	0.352135	0.416001	0.45278	0.457768	0.398236	0.342178	0.378848	0.223291	0.118312	0.407122	0.39656	0.290669	0.284784	0.304202	0.456555	0.313063	0.393021	0.446145	0.427827	0.418873	0.427101	0.428331	0.275651	0.197457	0.306963	0.470712	0.411224	0.33101	0.19182	0.0901143	0.263556	0.235617	0.432501	0.455138	0.445735	0.315407	0.256584	0.333219	0.303358
TCGA-CG-5721-01A	0.523863	0.381011	0.463364	0.465552	0.508677	0.486443	0.412955	0.40763	0.455118	0.415547	0.363288	0.425281	0.458237	0.457555	0.470734	0.293561	0.517751	0.313929	0.208424	0.386967	0.30714	0.353757	0.352766	0.394071	0.457604	0.399357	0.427113	0.536461	0.544932	0.420289	0.407572	0.458205	0.348138	0.282148	0.466079	0.217059	0.250207	0.448205	0.213238	0.118783	0.353585	0.330278	0.446849	0.485224	0.445585	0.390837	0.328572	0.336653	0.270058
TCGA-CG-5722-01A	0.495388	0.37364	0.40604	0.44191	0.482368	0.452483	0.403352	0.44186	0.441994	0.437681	0.367991	0.422481	0.46332	0.461128	0.422858	0.332259	0.511983	0.369538	0.168766	0.270738	0.309788	0.268712	0.275741	0.37695	0.472484	0.395393	0.364339	0.519618	0.481422	0.384854	0.441281	0.465025	0.348646	0.406947	0.469083	0.472217	0.152401	0.446249	0.208116	0.115932	0.319678	0.317126	0.420051	0.47377	0.473859	0.364168	0.304883	0.27868	0.311243
TCGA-CG-5723-01A	0.489393	0.364585	0.40224	0.464491	0.498565	0.478623	0.454822	0.401996	0.448253	0.416936	0.343378	0.420832	0.446489	0.460059	0.457207	0.328061	0.482623	0.184807	0.10378	0.401226	0.332997	0.238759	0.284277	0.299823	0.440939	0.320662	0.41759	0.49946	0.531895	0.408918	0.422381	0.439742	0.280911	0.0792327	0.420118	0.173533	0.334885	0.383246	0.209221	0.0894007	0.30178	0.284259	0.44254	0.454237	0.421544	0.319606	0.262733	0.315094	0.183542
TCGA-CG-5724-01A	0.355018	0.381697	0.314847	0.411086	0.501473	0.495208	0.458888	0.409794	0.449639	0.443735	0.389565	0.427632	0.477056	0.475409	0.412805	0.257107	0.34581	0.114017	0.0916923	0.424338	0.289799	0.217648	0.203896	0.192476	0.371154	0.208509	0.369486	0.41883	0.444623	0.359978	0.395867	0.473123	0.193417	-0.112256	0.332213	0.167472	0.315129	0.186077	0.220798	0.065485	0.193357	0.161944	0.381159	0.444879	0.413035	0.248809	0.147781	0.254705	0.154586
TCGA-CG-5725-01A	0.279694	0.389116	0.210307	0.440886	0.471894	0.463951	0.37781	0.372613	0.458177	0.446345	0.380498	0.422375	0.466358	0.473603	0.319663	0.309301	0.38101	0.0528137	0.134612	0.215201	0.19972	0.0833162	0.0767951	0.0721752	0.308607	0.108307	0.247156	0.311569	0.349632	0.237594	0.362414	0.443161	0.0883425	-0.230822	0.200453	0.159746	0.0235913	0.100267	0.161695	-0.0490114	0.10607	0.0485815	0.26928	0.440598	0.446822	0.207104	0.103574	0.219032	0.149396
TCGA-CG-5726-01A	0.287631	0.393611	0.189967	0.403509	0.435338	0.406897	0.269314	0.320866	0.455377	0.426528	0.38564	0.425353	0.47189	0.477291	0.334618	0.220161	0.26995	0.0409072	0.0612349	0.262832	0.240596	0.157368	0.120724	0.103225	0.384076	0.148699	0.327916	0.354755	0.354624	0.264742	0.367801	0.424673	0.113161	-0.185414	0.208524	0.172319	0.143439	0.116756	0.179672	-0.0182533	0.110039	0.0990366	0.287366	0.446674	0.449028	0.191026	0.092012	0.240735	0.0970493
TCGA-CG-5732-01A	0.391077	0.353043	0.309133	0.413549	0.469766	0.463161	0.319528	0.401523	0.424752	0.405113	0.330736	0.398708	0.432334	0.448513	0.373945	0.316507	0.416515	0.356748	0.177102	0.356859	0.368599	0.253572	0.226449	0.312492	0.433032	0.284074	0.386921	0.454426	0.386629	0.375522	0.42005	0.448437	0.302979	0.386806	0.34673	0.386744	0.276934	0.363601	0.193469	0.0890914	0.276341	0.252137	0.426328	0.442293	0.416689	0.320805	0.283924	0.319047	0.287849
TCGA-CG-5734-01A	0.462805	0.316862	0.385689	0.426016	0.484927	0.484953	0.402259	0.436675	0.419662	0.391014	0.301213	0.384511	0.419571	0.434954	0.391241	0.314076	0.438585	0.287998	0.112571	0.382886	0.348424	0.289403	0.255655	0.348976	0.460758	0.359229	0.419083	0.496304	0.482583	0.427889	0.43696	0.449829	0.318144	0.327092	0.375169	0.44756	0.36929	0.375545	0.197756	0.0947604	0.29532	0.287666	0.445693	0.474055	0.450776	0.349646	0.344199	0.333536	0.274708
TCGA-D7-5577-01A	0.497726	0.37433	0.413	0.428724	0.467785	0.443845	0.40468	0.430703	0.446148	0.437082	0.365635	0.431746	0.461616	0.460456	0.44944	0.250483	0.491978	0.142239	0.135374	0.421735	0.291642	0.331247	0.322618	0.34217	0.446576	0.351317	0.413016	0.512196	0.533211	0.380591	0.394959	0.446798	0.296254	0.0164967	0.431837	0.359809	0.265751	0.403046	0.215535	0.0871296	0.305713	0.270062	0.388822	0.471055	0.451714	0.364223	0.350514	0.316739	0.140487
TCGA-D7-5578-01A	0.403325	0.367808	0.321845	0.441427	0.492106	0.485379	0.444852	0.439269	0.448375	0.425485	0.365915	0.410407	0.454599	0.461297	0.38882	0.357066	0.388298	0.289885	0.146453	0.376483	0.29114	0.297831	0.249662	0.310802	0.419104	0.279603	0.356868	0.45103	0.430466	0.399149	0.431483	0.445249	0.280886	0.262626	0.340062	0.463187	0.264171	0.32912	0.200374	0.102053	0.252364	0.217167	0.433591	0.471577	0.462772	0.292008	0.194757	0.300455	0.273596
TCGA-D7-6519-01A	0.31997	0.369902	0.21686	0.451102	0.486675	0.501476	0.409863	0.448212	0.443644	0.410706	0.352696	0.414395	0.440246	0.458698	0.334836	0.340586	0.377435	0.0755125	-0.001519	0.350191	0.256285	0.23524	0.212031	0.144506	0.343074	0.204227	0.421117	0.38148	0.34564	0.274855	0.389622	0.450827	0.179592	-0.252442	0.307347	0.391214	0.08399	0.232317	0.22576	0.0147774	0.183441	0.145942	0.274135	0.410792	0.375712	0.238003	0.130039	0.232583	0.104374
TCGA-D7-6520-01A	0.31703	0.355157	0.304283	0.40659	0.512469	0.497298	0.451832	0.450605	0.430418	0.402078	0.335131	0.397273	0.422734	0.440422	0.344919	0.377272	0.261386	0.114453	0.0478735	0.374388	0.258585	0.243612	0.256172	0.218825	0.399984	0.210786	0.501248	0.404783	0.409505	0.310772	0.405469	0.461688	0.192245	-0.0477689	0.247444	0.286268	0.134371	0.22442	0.197291	0.0515238	0.2103	0.196143	0.353556	0.457393	0.426269	0.305431	0.254653	0.258985	0.19942
TCGA-D7-6521-01A	0.3766	0.347438	0.327222	0.432324	0.516596	0.480926	0.45415	0.456456	0.424305	0.404978	0.331108	0.399833	0.424469	0.440195	0.371041	0.395624	0.395151	0.372559	0.140614	0.405559	0.342451	0.305227	0.321195	0.319524	0.436804	0.301858	0.368938	0.454832	0.391214	0.382387	0.438515	0.470232	0.310142	0.323332	0.317549	0.463999	0.28848	0.393855	0.200464	0.100394	0.286229	0.258288	0.40152	0.466935	0.440853	0.335164	0.297186	0.289591	0.293429
TCGA-D7-6522-01A	0.4568	0.337502	0.408232	0.4261	0.512907	0.503531	0.481246	0.46229	0.421405	0.394536	0.315553	0.387603	0.426957	0.446094	0.406476	0.402306	0.478291	0.434262	0.135649	0.432405	0.371557	0.421742	0.332762	0.394875	0.449757	0.363855	0.413634	0.515048	0.442693	0.429351	0.465582	0.437709	0.379735	0.446056	0.408077	0.471414	0.313677	0.451925	0.21196	0.13629	0.342222	0.320768	0.456096	0.460325	0.405791	0.354663	0.289706	0.328176	0.386452
TCGA-D7-6524-01A	0.293896	0.358535	0.289895	0.442991	0.528532	0.518005	0.5048	0.493941	0.430564	0.398104	0.337272	0.401656	0.422243	0.440751	0.37918	0.404598	0.272269	0.18696	0.0718484	0.403753	0.407392	0.225462	0.248445	0.275175	0.438006	0.244508	0.35648	0.402363	0.353903	0.422891	0.461032	0.47326	0.240493	0.0022468	0.24956	0.428393	0.44008	0.281257	0.215318	0.109917	0.223859	0.18493	0.414118	0.464484	0.458779	0.296313	0.242871	0.299733	0.282214
TCGA-D7-6525-01A	0.299625	0.37881	0.309014	0.447654	0.498348	0.490802	0.443664	0.412674	0.449176	0.433617	0.379197	0.422347	0.456029	0.456602	0.383355	0.311379	0.320456	0.0750839	0.0811401	0.422481	0.278761	0.194771	0.193099	0.158223	0.435873	0.237849	0.456781	0.373557	0.353136	0.329863	0.376467	0.457905	0.190428	-0.227537	0.308768	0.40271	0.190876	0.193784	0.216029	0.043888	0.204858	0.241052	0.345486	0.458874	0.42138	0.258678	0.277111	0.293941	0.144944
TCGA-D7-6526-01A	0.169172	0.386023	0.163086	0.46527	0.479143	0.469711	0.377384	0.41176	0.457336	0.438015	0.386667	0.424686	0.460298	0.46233	0.308457	0.324272	0.182379	0.0518005	0.0558306	0.352852	0.344923	0.168393	0.184968	0.170324	0.267776	0.142959	0.361806	0.305367	0.264944	0.306004	0.397817	0.441493	0.146482	-0.14834	0.135482	0.231855	0.254401	0.148181	0.169493	-0.00154699	0.141532	0.0786524	0.341332	0.435121	0.418731	0.216473	0.03426	0.219789	0.108194
TCGA-D7-6527-01A	0.326813	0.365596	0.250947	0.445115	0.48039	0.481375	0.406791	0.43716	0.440167	0.42271	0.347241	0.405005	0.444865	0.4584	0.346943	0.350156	0.308554	0.134326	0.0943361	0.323127	0.31143	0.221436	0.172143	0.238849	0.395523	0.199466	0.337083	0.395355	0.36884	0.335349	0.426137	0.462558	0.204583	0.111686	0.278208	0.440418	0.274312	0.274477	0.186559	0.0302169	0.180244	0.117538	0.407667	0.451413	0.438661	0.246122	0.131524	0.235924	0.224442
TCGA-D7-6528-01A	0.261196	0.393251	0.186082	0.46664	0.482763	0.459237	0.375399	0.365623	0.459456	0.441417	0.400626	0.420575	0.467689	0.465051	0.352198	0.234075	0.22681	0.0336697	0.0178947	0.321914	0.234246	0.145819	0.189816	0.142967	0.395594	0.114256	0.376603	0.314326	0.333881	0.285882	0.347582	0.436691	0.102627	-0.26735	0.239627	0.140708	0.11258	0.0960291	0.198493	-0.0246635	0.153495	0.0822338	0.318544	0.440369	0.444757	0.209495	0.0927078	0.2477	-0.000569273
TCGA-D7-6815-01A	0.267619	0.37762	0.259462	0.405152	0.478357	0.487752	0.425901	0.433345	0.440187	0.427505	0.36088	0.415035	0.450634	0.455612	0.337789	0.326189	0.293823	0.0723227	0.0466813	0.385043	0.260167	0.177948	0.263328	0.216691	0.432183	0.225084	0.348993	0.366984	0.335459	0.330743	0.382561	0.450762	0.192022	-0.0824011	0.228323	0.231805	0.1585	0.212503	0.184421	0.0291368	0.20164	0.156242	0.335297	0.436327	0.430289	0.283615	0.210639	0.26673	0.126831
TCGA-D7-6818-01A	0.235358	0.363884	0.271263	0.453202	0.515684	0.50036	0.479136	0.424822	0.445126	0.420267	0.343688	0.404797	0.446707	0.449544	0.361054	0.399054	0.225687	0.223386	0.100407	0.429976	0.387892	0.27229	0.215901	0.218785	0.412634	0.242556	0.439184	0.382602	0.279145	0.384912	0.432814	0.453486	0.230398	0.121066	0.263231	0.37592	0.374449	0.197022	0.216249	0.0758773	0.215057	0.206278	0.361518	0.460883	0.430037	0.234454	0.123224	0.3022	0.237068
TCGA-D7-6822-01A	0.401425	0.388105	0.287075	0.459595	0.480348	0.469085	0.400578	0.396842	0.456479	0.433764	0.36972	0.424835	0.449932	0.455922	0.384957	0.302498	0.433204	0.0654849	0.040071	0.340993	0.338725	0.168271	0.184617	0.20225	0.384035	0.232694	0.38675	0.391173	0.479794	0.341298	0.369654	0.465141	0.184496	-0.207809	0.277077	0.151392	0.341837	0.193392	0.212688	0.0401351	0.183487	0.134975	0.32469	0.448661	0.452156	0.25914	0.229493	0.272653	0.0860394
TCGA-D7-8570-01A	0.488836	0.373725	0.430264	0.443887	0.496428	0.457204	0.435464	0.462406	0.437667	0.436535	0.368626	0.415634	0.455193	0.449417	0.435071	0.295938	0.466547	0.300246	0.175659	0.464949	0.312508	0.337841	0.282032	0.374893	0.470266	0.397849	0.356385	0.514616	0.511144	0.383244	0.394752	0.443511	0.347744	0.301901	0.461764	0.392302	0.231381	0.428285	0.212907	0.0972176	0.321529	0.307261	0.406247	0.480624	0.457397	0.35527	0.331771	0.296912	0.269978
TCGA-D7-8572-01A	0.364379	0.377491	0.343675	0.458302	0.529102	0.515032	0.492355	0.483739	0.452474	0.421828	0.358065	0.409975	0.446307	0.450498	0.407576	0.384045	0.373905	0.218983	0.0555359	0.419744	0.346724	0.234915	0.253727	0.290651	0.405533	0.291685	0.41711	0.430333	0.415999	0.393957	0.420318	0.448475	0.269645	0.153338	0.328935	0.319473	0.326402	0.313755	0.215708	0.0796732	0.263321	0.244096	0.395789	0.475877	0.46737	0.344723	0.269775	0.296476	0.200292
TCGA-D7-8573-01A	0.346538	0.398237	0.225792	0.432247	0.435268	0.403464	0.329766	0.383055	0.456982	0.451704	0.385572	0.442685	0.471966	0.464224	0.381649	0.183673	0.284734	0.127344	0.135428	0.272802	0.252493	0.123283	0.175588	0.166007	0.334612	0.195585	0.243229	0.396943	0.446099	0.318735	0.359592	0.431584	0.171654	0.100372	0.236082	0.214093	0.230266	0.233445	0.209264	0.0352563	0.159892	0.130939	0.360755	0.417218	0.451061	0.230886	0.137	0.242203	0.107636
TCGA-D7-8574-01A	0.421518	0.34398	0.343284	0.434785	0.504223	0.490399	0.41103	0.483279	0.40923	0.381669	0.31824	0.392608	0.401864	0.426874	0.359999	0.408313	0.422188	0.488769	0.163462	0.339052	0.332829	0.31335	0.29843	0.35166	0.425072	0.331252	0.416359	0.48734	0.420439	0.357624	0.433707	0.412093	0.359508	0.45628	0.358386	0.356648	0.126443	0.47014	0.19615	0.0900473	0.303001	0.28134	0.35682	0.444332	0.394801	0.335728	0.248602	0.285734	0.361484
TCGA-D7-8575-01A	0.259846	0.348292	0.236886	0.434074	0.455159	0.461248	0.341942	0.383365	0.402613	0.399703	0.306161	0.395779	0.405718	0.431869	0.327634	0.316769	0.227818	0.241612	0.151062	0.456302	0.346268	0.192212	0.198273	0.209893	0.434618	0.229853	0.42742	0.366871	0.34817	0.354016	0.393382	0.440106	0.242822	0.140583	0.217076	0.375571	0.24026	0.277579	0.191168	0.0950321	0.204387	0.185479	0.374375	0.449092	0.408248	0.263043	0.225668	0.25651	0.15929
TCGA-D7-8576-01A	0.273492	0.380363	0.205236	0.420812	0.475724	0.461292	0.399116	0.431829	0.442618	0.423212	0.376424	0.41653	0.4473	0.460981	0.343742	0.341254	0.224423	0.120224	0.0570225	0.406901	0.314224	0.249563	0.220824	0.178152	0.400912	0.186389	0.401738	0.356942	0.364956	0.329827	0.399454	0.459915	0.192178	0.0717264	0.165392	0.438498	0.21399	0.144309	0.204231	0.0443494	0.171672	0.145579	0.342879	0.461792	0.451775	0.226212	0.0788429	0.239048	0.0982116
TCGA-D7-8578-01A	0.298422	0.34966	0.260501	0.427205	0.534783	0.511896	0.500749	0.476435	0.421306	0.400615	0.33725	0.395904	0.411639	0.430186	0.339241	0.419172	0.363678	0.228772	0.138266	0.379612	0.297364	0.210309	0.29395	0.224806	0.411	0.229896	0.362376	0.394699	0.284345	0.339763	0.437994	0.475168	0.234687	0.164195	0.268077	0.390671	0.151492	0.247129	0.21131	0.0573903	0.22367	0.182302	0.339814	0.450732	0.430685	0.316149	0.209043	0.282746	0.157579
TCGA-D7-8579-01A	0.254758	0.343746	0.252204	0.445654	0.509803	0.490212	0.4346	0.450702	0.412655	0.384128	0.313642	0.39529	0.399001	0.416465	0.333532	0.445493	0.2941	0.274636	0.0753108	0.353784	0.38032	0.215114	0.247038	0.273759	0.41217	0.246881	0.390742	0.395172	0.263745	0.380574	0.460803	0.445085	0.266156	0.203367	0.270381	0.485323	0.350626	0.276806	0.205073	0.0855275	0.218982	0.178109	0.399162	0.42586	0.395027	0.2867	0.252403	0.296669	0.211357
TCGA-D7-A4YU-01A	0.474501	0.397295	0.411874	0.461821	0.495506	0.488207	0.39252	0.42808	0.457421	0.439534	0.374635	0.430295	0.458687	0.453534	0.450814	0.357109	0.452323	0.381194	0.133053	0.377281	0.316722	0.294235	0.283488	0.372418	0.470038	0.358445	0.467225	0.511256	0.523835	0.387855	0.433967	0.433578	0.348792	0.374404	0.410786	0.35556	0.226986	0.410426	0.209077	0.0943942	0.321622	0.326892	0.393589	0.494044	0.488502	0.352001	0.292545	0.317094	0.309823
TCGA-D7-A4YX-01A	0.478851	0.39915	0.379764	0.470787	0.449165	0.424864	0.338654	0.421127	0.457024	0.45101	0.391616	0.441681	0.467635	0.460382	0.445029	0.191529	0.460138	0.103124	0.103958	0.334069	0.297965	0.218426	0.283117	0.30314	0.421425	0.344579	0.363576	0.489818	0.533821	0.366959	0.373392	0.451805	0.259964	-0.0621523	0.43537	0.216946	0.234388	0.385047	0.21032	0.0596226	0.288118	0.25438	0.374869	0.461615	0.469674	0.309435	0.237573	0.308729	0.267723
TCGA-D7-A4Z0-01A	0.305258	0.346605	0.310942	0.419574	0.517122	0.509909	0.435376	0.481284	0.414968	0.383801	0.320908	0.394724	0.402634	0.419762	0.353136	0.407546	0.303188	0.381744	0.230226	0.367739	0.360472	0.251364	0.217614	0.330892	0.426283	0.292947	0.34076	0.421202	0.34403	0.396432	0.457101	0.465811	0.292386	0.342634	0.287159	0.469982	0.32111	0.343319	0.23118	0.11282	0.248992	0.234841	0.416343	0.458579	0.461152	0.308336	0.29913	0.308927	0.252137
TCGA-D7-A6EV-01A	0.244653	0.39718	0.215456	0.452271	0.458353	0.459949	0.366797	0.385482	0.457829	0.436706	0.395238	0.433314	0.468763	0.473401	0.333581	0.24679	0.236196	0.0798825	0.100847	0.328554	0.283342	0.109368	0.189693	0.201108	0.35426	0.153121	0.295638	0.328407	0.305759	0.315148	0.377378	0.448174	0.149697	0.0170262	0.209144	0.26895	0.170876	0.150475	0.188402	0.00887982	0.163581	0.139867	0.329739	0.418732	0.417525	0.248448	0.153072	0.266599	0.0741698
TCGA-D7-A6EX-01A	0.262378	0.36002	0.249202	0.440001	0.47711	0.484207	0.381746	0.452724	0.442484	0.408192	0.320913	0.405772	0.4238	0.450728	0.284079	0.368902	0.225668	0.228194	0.114135	0.238361	0.260037	0.158493	0.11024	0.159738	0.264448	0.18627	0.265779	0.339499	0.323386	0.195811	0.375448	0.385567	0.146438	0.134368	0.213404	0.302708	-0.12884	0.198752	0.186279	-0.0506059	0.138794	0.135226	0.226674	0.376847	0.375809	0.206124	0.144171	0.174201	0.0894917
TCGA-D7-A6EY-01A	0.463707	0.378985	0.393042	0.460147	0.506388	0.484317	0.415835	0.43152	0.448682	0.42521	0.358971	0.425853	0.44982	0.456781	0.443481	0.357584	0.449864	0.406169	0.116894	0.399929	0.358889	0.31631	0.328134	0.363112	0.451013	0.355126	0.423687	0.505869	0.517117	0.390187	0.420697	0.463404	0.344007	0.403485	0.389887	0.304191	0.313757	0.405538	0.21951	0.107204	0.315743	0.296693	0.423166	0.461024	0.425653	0.36144	0.340444	0.340412	0.251796
TCGA-D7-A6EZ-01A	0.49805	0.404447	0.417263	0.449399	0.468463	0.436006	0.413534	0.415791	0.461556	0.458303	0.393603	0.450713	0.484954	0.463437	0.461161	0.227135	0.478273	0.115022	0.127554	0.38128	0.300173	0.234292	0.259628	0.333679	0.429601	0.33245	0.405212	0.501956	0.536769	0.400612	0.4009	0.443321	0.270995	-0.11066	0.429164	0.19551	0.271355	0.380568	0.203819	0.105326	0.294883	0.285625	0.439484	0.472589	0.47165	0.341551	0.270588	0.310175	0.242331
TCGA-D7-A6F0-01A	0.419419	0.396592	0.331324	0.463745	0.438096	0.464673	0.341279	0.397787	0.465677	0.439734	0.392475	0.425199	0.471842	0.464501	0.397938	0.309647	0.398439	0.119223	0.151107	0.351249	0.260918	0.212932	0.238091	0.285923	0.372742	0.278224	0.311497	0.437127	0.486525	0.311558	0.346208	0.449991	0.241948	0.120727	0.32117	0.0391063	0.0483471	0.324618	0.191584	0.0297705	0.25152	0.207227	0.327259	0.464103	0.469737	0.307489	0.290886	0.244476	0.132753
TCGA-D7-A6F2-01A	0.383365	0.374288	0.296944	0.424029	0.476688	0.485507	0.385835	0.431274	0.435129	0.424321	0.377426	0.412823	0.44365	0.450653	0.365986	0.32508	0.383824	0.154016	0.0926256	0.411273	0.308314	0.31203	0.218046	0.296167	0.37207	0.294472	0.334885	0.419895	0.415445	0.341346	0.400091	0.441729	0.25135	0.0993539	0.335952	0.319368	0.137787	0.339294	0.20012	0.0424341	0.242657	0.229732	0.36454	0.434413	0.414521	0.278572	0.239006	0.287947	0.23878
TCGA-D7-A747-01A	0.312007	0.314773	0.282014	0.423386	0.514859	0.453552	0.469488	0.455938	0.407021	0.372374	0.281292	0.380379	0.3946	0.407366	0.301387	0.459356	0.314934	0.382696	0.174247	0.267588	0.294457	0.226059	0.237363	0.253698	0.380023	0.267447	0.378062	0.445234	0.372135	0.295738	0.415475	0.372651	0.254794	0.346653	0.287031	0.4307	-0.0192266	0.376351	0.208489	0.0519817	0.224974	0.198684	0.304275	0.388444	0.331772	0.26927	0.181475	0.228592	0.222934
TCGA-D7-A748-01A	0.331594	0.307139	0.316483	0.42272	0.507225	0.520279	0.481896	0.446266	0.401574	0.366451	0.270777	0.377981	0.393285	0.409204	0.35272	0.395853	0.315199	0.214524	0.120345	0.454053	0.350571	0.308617	0.293546	0.26212	0.418961	0.269787	0.431496	0.43474	0.420423	0.407263	0.448664	0.455271	0.261945	0.0246059	0.309539	0.340821	0.389046	0.288239	0.213245	0.107652	0.245981	0.221461	0.416832	0.449176	0.401476	0.312339	0.290144	0.320645	0.168547
TCGA-D7-A74A-01A	0.348294	0.376745	0.263921	0.426529	0.424925	0.440774	0.273657	0.36546	0.440994	0.435002	0.367286	0.429561	0.457682	0.460293	0.369446	0.232268	0.32181	0.0684421	0.0896515	0.278523	0.244433	0.19976	0.240687	0.193323	0.372714	0.19391	0.324996	0.416662	0.432127	0.287513	0.395292	0.442363	0.179055	0.0025147	0.263466	0.141329	0.0142432	0.268244	0.182288	-0.00503237	0.199745	0.162521	0.309811	0.413203	0.394513	0.270235	0.139434	0.237736	0.0444732
TCGA-EQ-8122-01A	0.181983	0.379356	0.130011	0.442128	0.508651	0.49628	0.459423	0.455999	0.447528	0.431356	0.371481	0.418692	0.455767	0.45354	0.322329	0.391185	0.219058	0.031983	0.0101221	0.390991	0.287729	0.154852	0.157584	0.0789889	0.372648	0.136313	0.411264	0.292381	0.227468	0.326646	0.430367	0.47041	0.14581	-0.153641	0.163282	0.2732	0.276142	0.0852435	0.199858	0.0122004	0.11115	0.0818023	0.357172	0.453132	0.454187	0.193565	0.0873322	0.249417	0.0947119
TCGA-F1-6177-01A	0.347522	0.401143	0.297012	0.442029	0.4495	0.462126	0.369844	0.380771	0.458016	0.4316	0.395114	0.43281	0.467405	0.468123	0.383357	0.17499	0.309071	0.00669548	0.0366563	0.341758	0.237608	0.121299	0.214148	0.225985	0.41854	0.207084	0.38587	0.384819	0.389335	0.321105	0.336931	0.440714	0.158008	-0.354782	0.287269	-0.0665439	0.1543	0.208462	0.180425	0.0236739	0.192377	0.16812	0.336165	0.421501	0.419612	0.30023	0.253386	0.309498	0.110887
TCGA-F1-6874-01A	0.438832	0.369578	0.343444	0.45198	0.485188	0.511044	0.439598	0.453833	0.440769	0.416622	0.35327	0.402335	0.435768	0.440598	0.420699	0.259161	0.411538	0.0952901	0.134711	0.388328	0.395689	0.224906	0.230136	0.268582	0.44904	0.284746	0.374322	0.447481	0.464763	0.410133	0.409342	0.473079	0.244119	-0.0412503	0.403822	0.111064	0.408122	0.296185	0.205959	0.0783646	0.251641	0.239904	0.392845	0.46915	0.467714	0.29268	0.238835	0.3157	0.208411
TCGA-F1-6875-01A	-0.0170413	0.398179	0.203584	0.432545	0.458727	0.469155	0.357499	0.366796	0.454563	0.432085	0.387099	0.429213	0.461663	0.470671	0.250624	0.295676	0.181177	0.0589847	0.049745	0.322481	0.195785	0.0888281	0.0168815	-0.0186519	0.260391	0.0973408	0.308386	0.0802992	0.045612	0.254097	0.352064	0.426818	0.0272217	-0.248877	0.0211429	-0.13016	0.0311224	-0.21501	0.195854	-0.00106937	0.0141096	0.0431149	0.177887	0.413622	0.423771	0.180807	0.284649	0.250094	0.118308
TCGA-F1-A448-01A	0.316057	0.355506	0.330911	0.444815	0.513201	0.519874	0.465941	0.484229	0.435973	0.399921	0.341878	0.408523	0.427054	0.435644	0.383757	0.354431	0.327008	0.341275	0.13994	0.404886	0.385818	0.214486	0.259499	0.275594	0.43714	0.298759	0.332855	0.422579	0.321571	0.414334	0.451956	0.472284	0.284647	0.324529	0.312461	0.41355	0.406138	0.316131	0.204526	0.0850546	0.256366	0.240352	0.422212	0.460168	0.45435	0.301459	0.26735	0.32476	0.256928
TCGA-F1-A72C-01A	0.37327	0.364415	0.343098	0.458554	0.489906	0.499885	0.439402	0.450904	0.449734	0.425801	0.359822	0.41597	0.45815	0.451392	0.395324	0.332721	0.39275	0.244742	0.0687513	0.390327	0.293091	0.201488	0.22694	0.225971	0.398432	0.281306	0.421235	0.452733	0.400037	0.362275	0.39902	0.456779	0.237998	0.224422	0.369969	0.352169	0.166541	0.298448	0.180846	0.0259472	0.238758	0.2412	0.401749	0.460921	0.454974	0.278031	0.230776	0.309248	0.182486
TCGA-FP-7735-01A	0.353237	0.368214	0.323968	0.454841	0.494928	0.489552	0.406912	0.434119	0.44155	0.43319	0.363937	0.420715	0.44599	0.454241	0.36831	0.357856	0.374308	0.307141	0.106006	0.361391	0.249456	0.212182	0.274842	0.307776	0.404981	0.281577	0.322712	0.443396	0.340581	0.341779	0.404361	0.471205	0.273848	0.281342	0.341047	0.296217	0.135872	0.352866	0.200797	0.0439307	0.273261	0.23778	0.387172	0.445528	0.44657	0.305086	0.247087	0.272817	0.296185
TCGA-FP-7829-01A	0.0780918	0.385527	0.125616	0.46194	0.490875	0.499307	0.442279	0.446998	0.456156	0.428343	0.375471	0.423375	0.456844	0.447499	0.298013	0.314677	0.047908	0.105829	0.0333359	0.432584	0.261483	0.185958	0.223413	0.108517	0.366505	0.0992652	0.308622	0.24469	0.214052	0.311456	0.38861	0.46421	0.132849	-0.0374292	0.0468681	0.167142	0.24349	0.0596439	0.193196	0.0313217	0.131987	0.0679718	0.338349	0.45503	0.441992	0.210637	0.0496139	0.239682	0.127934
TCGA-FP-7916-01A	0.478012	0.367642	0.398556	0.451998	0.499462	0.481039	0.426234	0.469081	0.44154	0.41783	0.345672	0.419437	0.435857	0.437398	0.42191	0.379114	0.472333	0.333738	0.163633	0.378221	0.312566	0.342965	0.309214	0.363798	0.464875	0.360249	0.460492	0.513314	0.514212	0.379531	0.430785	0.453377	0.341676	0.352521	0.413062	0.432591	0.193894	0.418325	0.220951	0.104415	0.314031	0.305533	0.403513	0.474254	0.452789	0.352597	0.326757	0.320839	0.29086
TCGA-FP-7998-01A	0.524244	0.378228	0.475295	0.458808	0.513617	0.469798	0.439114	0.475986	0.443479	0.423445	0.354999	0.420833	0.44578	0.438357	0.452402	0.372322	0.533892	0.34596	0.173889	0.423762	0.323777	0.369806	0.337024	0.386594	0.518592	0.440787	0.440096	0.542753	0.54461	0.397461	0.422137	0.45656	0.382764	0.330988	0.470517	0.37258	0.232713	0.456968	0.206491	0.101112	0.349467	0.340456	0.396425	0.492704	0.479633	0.380165	0.365948	0.314019	0.312225
TCGA-FP-8099-01A	0.268811	0.376785	0.212129	0.449833	0.484107	0.487061	0.428643	0.4265	0.439572	0.420358	0.36908	0.411283	0.448086	0.451089	0.35735	0.280012	0.208391	0.126629	0.131421	0.385375	0.295856	0.184788	0.253894	0.153985	0.361255	0.190298	0.432372	0.359148	0.382243	0.322436	0.361121	0.448679	0.191143	0.0326593	0.243477	0.283239	0.161983	0.157265	0.192415	0.00513667	0.189752	0.186457	0.313128	0.450544	0.445769	0.279222	0.184095	0.269616	0.192843
TCGA-FP-8209-01A	0.404888	0.335975	0.354366	0.429781	0.530033	0.480136	0.479824	0.47336	0.399912	0.371561	0.294453	0.390943	0.389612	0.404898	0.339891	0.47413	0.441066	0.475233	0.212943	0.324119	0.375383	0.376123	0.311354	0.348587	0.427227	0.356594	0.387668	0.487844	0.382246	0.377004	0.473344	0.419728	0.342992	0.416754	0.350822	0.463893	0.236351	0.439369	0.220099	0.0878495	0.308918	0.291	0.375346	0.45084	0.414752	0.335014	0.286241	0.297005	0.334035
TCGA-FP-8210-01A	0.415892	0.343437	0.339554	0.437081	0.523412	0.497576	0.461217	0.481216	0.414038	0.387246	0.31989	0.39206	0.40862	0.426438	0.3717	0.451879	0.43222	0.457709	0.182654	0.372812	0.356963	0.327777	0.27762	0.352027	0.408637	0.34453	0.375529	0.49084	0.43504	0.379017	0.468035	0.443849	0.352095	0.428375	0.364542	0.450332	0.29405	0.431546	0.218934	0.0857145	0.295002	0.282756	0.441579	0.449329	0.40854	0.343133	0.295208	0.323049	0.347413
TCGA-FP-8211-01A	0.371174	0.376878	0.270252	0.407962	0.431126	0.453738	0.322989	0.391598	0.430153	0.432536	0.372718	0.412847	0.453134	0.461458	0.369558	0.283837	0.381246	0.207387	0.112287	0.307416	0.25464	0.188419	0.195574	0.268928	0.375886	0.217129	0.368173	0.437186	0.401683	0.288489	0.386005	0.462657	0.222059	0.0557679	0.317894	0.376429	0.0460518	0.353378	0.198853	0.0320444	0.237277	0.231256	0.352676	0.447176	0.424245	0.296316	0.270742	0.26591	0.216278
TCGA-FP-8631-01A	0.153547	0.354053	0.0455842	0.475968	0.500448	0.487942	0.421073	0.44849	0.4367	0.415414	0.358359	0.399324	0.446818	0.438448	0.264238	0.3012	0.0793977	0.022603	0.0460985	0.274944	0.267386	0.143045	0.120113	0.0812552	0.337565	0.121211	0.427953	0.231842	0.257948	0.210487	0.356673	0.474245	0.0752197	-0.146758	0.0677457	0.343317	0.0447232	0.0369424	0.196516	-0.0721368	0.0899582	0.0773003	0.23912	0.41666	0.405883	0.194543	0.047839	0.169555	0.114606
TCGA-FP-A4BF-01A	0.503423	0.36521	0.415922	0.464034	0.505133	0.512291	0.457677	0.453482	0.443544	0.427082	0.361144	0.419061	0.443648	0.43468	0.450423	0.340685	0.502555	0.242195	0.199773	0.424514	0.32862	0.287401	0.339157	0.354418	0.41311	0.396291	0.464803	0.517572	0.534951	0.380817	0.410189	0.452256	0.325145	0.181554	0.490153	0.405504	0.176842	0.427699	0.239301	0.0785577	0.342705	0.305643	0.381856	0.465443	0.43706	0.348184	0.267064	0.305047	0.22873
TCGA-FP-A8CX-01A	0.336628	0.365914	0.271281	0.447047	0.467917	0.442064	0.343952	0.377542	0.437749	0.423767	0.355375	0.414457	0.446953	0.452473	0.354759	0.300402	0.325559	0.221218	0.160342	0.351482	0.285456	0.208115	0.179099	0.218572	0.394018	0.239869	0.398897	0.410463	0.407557	0.324157	0.387973	0.444661	0.22874	0.221851	0.272934	0.318658	0.179987	0.276115	0.180891	0.0400822	0.204375	0.17977	0.353911	0.449078	0.433649	0.25336	0.221005	0.259018	0.187781
TCGA-FP-A9TM-01A	0.31725	0.383418	0.293131	0.471471	0.452975	0.449347	0.277868	0.369671	0.44503	0.436945	0.375787	0.417302	0.451472	0.456825	0.364577	0.286984	0.287818	0.483138	0.119538	0.25913	0.327429	0.241736	0.215383	0.293036	0.396588	0.295219	0.380351	0.433173	0.378409	0.346371	0.404913	0.427599	0.300607	0.456166	0.276068	0.350489	0.153277	0.343078	0.187823	0.0775654	0.243875	0.243331	0.360032	0.440116	0.426966	0.311561	0.320686	0.301964	0.327301
TCGA-HF-7131-01A	0.35305	0.374412	0.332654	0.447439	0.48844	0.494905	0.413243	0.447462	0.446076	0.428293	0.362853	0.41957	0.444996	0.443714	0.376413	0.34484	0.373809	0.163705	0.127061	0.351339	0.366049	0.227616	0.255114	0.289945	0.451273	0.268959	0.366564	0.419712	0.377101	0.390928	0.436402	0.476265	0.241874	0.00955943	0.319155	0.424298	0.351108	0.336437	0.200812	0.0834897	0.244293	0.205915	0.366845	0.465937	0.469512	0.304432	0.284788	0.309462	0.155855
TCGA-HF-7132-01A	0.440947	0.376199	0.357401	0.451928	0.490842	0.475485	0.427917	0.424212	0.449051	0.412103	0.355356	0.41584	0.438426	0.450852	0.416585	0.372315	0.426539	0.370518	0.115907	0.383457	0.33781	0.276694	0.293331	0.352421	0.448986	0.353229	0.383592	0.483312	0.464168	0.382998	0.433698	0.438456	0.332398	0.336729	0.400967	0.403478	0.244693	0.403844	0.205546	0.0828346	0.310259	0.291213	0.42541	0.454392	0.423851	0.354601	0.333745	0.327661	0.30036
TCGA-HF-7133-01A	0.423497	0.390227	0.363545	0.472889	0.485389	0.46881	0.413981	0.444052	0.456839	0.434399	0.378745	0.423676	0.461056	0.464411	0.423332	0.355162	0.410422	0.269157	0.107163	0.408918	0.340621	0.276675	0.288817	0.333778	0.447166	0.336407	0.39483	0.459805	0.473884	0.394265	0.439225	0.465912	0.299062	0.206993	0.339937	0.442911	0.329406	0.359754	0.215526	0.100206	0.300063	0.288052	0.396975	0.489613	0.472854	0.330507	0.312205	0.314275	0.203168
TCGA-HF-7134-01A	0.287839	0.388306	0.291683	0.445916	0.478551	0.487391	0.365334	0.431251	0.451908	0.430913	0.366803	0.420379	0.450582	0.455538	0.371662	0.28197	0.292155	0.192624	0.150146	0.374649	0.319284	0.214899	0.261824	0.253904	0.427606	0.251615	0.37607	0.37574	0.335227	0.366815	0.419403	0.486012	0.198098	0.147817	0.255598	0.262307	0.295103	0.26289	0.19335	0.0640279	0.225207	0.180462	0.336069	0.458382	0.475583	0.302184	0.232662	0.291759	0.167149
TCGA-HF-A5NB-01A	0.38475	0.389094	0.319141	0.430668	0.446317	0.455992	0.316655	0.367862	0.452601	0.416619	0.366434	0.424139	0.444233	0.455045	0.389615	0.17763	0.363002	0.0696877	0.0839829	0.371065	0.265357	0.214183	0.226871	0.233162	0.424866	0.271717	0.354834	0.410079	0.424035	0.289193	0.360656	0.458957	0.1848	-0.266319	0.313595	-0.0956467	0.133454	0.310441	0.195775	0.0211205	0.221328	0.177176	0.289356	0.45687	0.44032	0.278678	0.226911	0.272044	0.0582837
TCGA-HJ-7597-01A	0.467254	0.366557	0.326076	0.449196	0.488641	0.468045	0.396375	0.397707	0.444326	0.405422	0.346116	0.407249	0.435393	0.455137	0.419733	0.252994	0.45628	0.26773	0.0942253	0.257609	0.350707	0.236306	0.212052	0.218783	0.42115	0.28731	0.390919	0.484946	0.516659	0.313684	0.358177	0.469092	0.25456	0.235815	0.400318	0.29181	0.184699	0.34241	0.196585	0.0039881	0.236051	0.248442	0.362795	0.450863	0.448257	0.26219	0.190636	0.273939	0.146237
TCGA-HU-8238-01A	0.324994	0.356505	0.261387	0.450716	0.477765	0.460514	0.373693	0.403533	0.440149	0.407395	0.345034	0.408326	0.438413	0.451948	0.365512	0.309179	0.328576	0.261669	0.179632	0.361812	0.310473	0.197561	0.168224	0.224415	0.4129	0.23729	0.449809	0.41524	0.393539	0.363275	0.408756	0.450997	0.237739	0.231504	0.249215	0.494613	0.293685	0.23821	0.187456	0.0514757	0.187606	0.17902	0.429673	0.447226	0.444196	0.245403	0.194989	0.24082	0.191176
TCGA-HU-8244-01A	0.166589	0.381437	-0.0412973	0.411802	0.369457	0.377885	0.126689	0.260374	0.442952	0.445025	0.37794	0.426747	0.460468	0.466977	0.273772	0.161641	0.202022	-0.0327788	0.0183903	0.193747	0.236606	0.102115	0.0394625	0.0168481	0.320285	0.047746	0.230128	0.25045	0.193193	0.214507	0.322291	0.414404	0.0408477	-0.143081	0.181768	0.0523965	-0.00391556	0.0818344	0.169088	-0.0169098	0.044226	0.0091172	0.196825	0.389897	0.393767	0.0691619	-0.113282	0.15246	-0.173672
TCGA-HU-8249-01A	0.451444	0.380367	0.300704	0.42963	0.448753	0.458441	0.403128	0.383096	0.457087	0.454124	0.38207	0.433443	0.4854	0.46499	0.410916	0.225194	0.422601	0.0979115	0.110487	0.27706	0.275826	0.238443	0.189464	0.267054	0.391965	0.2282	0.286197	0.443543	0.492013	0.363263	0.34415	0.430675	0.19395	-0.00963596	0.376842	0.25341	0.140574	0.302168	0.204195	0.0161212	0.208408	0.162951	0.389446	0.439614	0.455768	0.271167	0.182753	0.269217	0.143181
TCGA-HU-8602-01A	0.468212	0.409908	0.426679	0.451827	0.47988	0.477078	0.419826	0.426664	0.470043	0.431441	0.39441	0.440211	0.466262	0.462434	0.471997	0.184145	0.425738	0.0825726	0.064791	0.406224	0.360224	0.289775	0.309772	0.338064	0.418043	0.362241	0.428104	0.486819	0.521055	0.413918	0.405991	0.450114	0.268601	0.0532901	0.39793	-0.305906	0.396055	0.355789	0.205605	0.0996622	0.30159	0.28315	0.396728	0.459958	0.439495	0.353952	0.288284	0.334121	0.146997
TCGA-HU-8604-01A	0.50258	0.385613	0.432073	0.454214	0.502558	0.501293	0.463553	0.445139	0.458636	0.446442	0.389416	0.434146	0.477791	0.456733	0.457483	0.289615	0.493838	0.19181	0.0626181	0.43685	0.329133	0.290134	0.278987	0.333322	0.494128	0.400665	0.369714	0.500992	0.510291	0.419387	0.424566	0.452829	0.317413	0.176192	0.444648	0.157288	0.3414	0.414725	0.203679	0.076708	0.310446	0.300774	0.428929	0.481272	0.46982	0.340945	0.30337	0.313578	0.203411
TCGA-HU-8608-01A	0.511294	0.394336	0.481133	0.460855	0.461765	0.413722	0.383847	0.431379	0.457159	0.445234	0.386007	0.433504	0.467924	0.451557	0.463753	0.215408	0.505082	0.314387	0.226025	0.432003	0.335244	0.335059	0.309108	0.396247	0.496699	0.438204	0.420936	0.526288	0.540551	0.439923	0.410378	0.450142	0.345457	0.2878	0.453408	0.0994346	0.302271	0.443689	0.207746	0.131182	0.344943	0.341546	0.441688	0.493234	0.493035	0.379728	0.374715	0.343641	0.336365
TCGA-HU-8610-01A	0.381601	0.364225	0.398819	0.438485	0.513569	0.48266	0.37174	0.440107	0.4339	0.397081	0.341068	0.405152	0.41758	0.436411	0.400547	0.287444	0.31392	0.18495	0.19358	0.398868	0.349803	0.207292	0.284836	0.370226	0.445298	0.326072	0.439853	0.465238	0.423542	0.419755	0.437937	0.486729	0.268363	0.0178301	0.325833	0.257832	0.353037	0.368064	0.210374	0.10438	0.28371	0.237019	0.432252	0.462712	0.442875	0.3482	0.348356	0.34165	0.221003
TCGA-HU-A4G2-01A	0.433858	0.39033	0.276818	0.440765	0.4678	0.442829	0.367162	0.440489	0.448728	0.456706	0.387037	0.446154	0.474089	0.456041	0.407739	0.305578	0.422937	0.106884	0.0674932	0.375216	0.29156	0.196658	0.190503	0.22205	0.408651	0.277072	0.339897	0.435038	0.484527	0.317064	0.403764	0.448314	0.196452	-0.0557531	0.375763	0.184291	0.0924692	0.322023	0.197288	0.0279548	0.206261	0.18053	0.367415	0.447585	0.472786	0.262554	0.223073	0.280481	0.168374
TCGA-HU-A4G3-01A	0.266937	0.366373	0.118255	0.460514	0.477583	0.453506	0.359684	0.400893	0.431154	0.414066	0.351109	0.410766	0.426616	0.4488	0.311137	0.318274	0.278474	0.173466	0.0466399	0.333397	0.2706	0.153461	0.175253	0.128255	0.338026	0.141979	0.349608	0.338591	0.266187	0.292378	0.390155	0.453183	0.175954	0.0628522	0.272594	0.468598	0.19524	0.169089	0.183565	0.0250526	0.144643	0.110808	0.317954	0.422349	0.429554	0.185357	0.0897587	0.253569	0.170687
TCGA-HU-A4G8-01A	0.426331	0.399753	0.356255	0.482218	0.461795	0.471854	0.370894	0.412711	0.466912	0.433678	0.383402	0.428117	0.464771	0.470202	0.425544	0.242299	0.3773	0.33959	0.0680701	0.360028	0.320498	0.208684	0.249659	0.283986	0.439686	0.309993	0.458623	0.475602	0.503054	0.349545	0.390286	0.462241	0.281497	0.309967	0.335357	0.0991868	0.133409	0.347989	0.197991	0.0573688	0.255071	0.24709	0.371918	0.468724	0.459697	0.323601	0.297899	0.320764	0.160255
TCGA-HU-A4G9-01A	0.180318	0.385814	0.0383029	0.433544	0.364423	0.38333	0.159823	0.291348	0.449214	0.410824	0.369779	0.426282	0.450608	0.461096	0.292909	0.114152	0.154563	-0.0240223	0.00551331	0.213012	0.246819	0.0595221	0.021995	0.0329215	0.365853	0.0359964	0.309412	0.268829	0.28844	0.215565	0.329568	0.404895	0.0424016	-0.095099	0.130981	0.114485	0.0972518	-0.0107941	0.150209	-0.0245874	0.0241085	0.012789	0.236916	0.410013	0.429725	0.138348	0.0549687	0.221728	-0.0493516
TCGA-HU-A4GC-01A	0.362331	0.371846	0.234813	0.447163	0.470428	0.473961	0.382264	0.415425	0.442126	0.425542	0.376622	0.417422	0.452975	0.456302	0.349545	0.348725	0.376005	0.141414	0.142174	0.305375	0.259463	0.164916	0.192574	0.168371	0.384581	0.236712	0.397662	0.417628	0.377737	0.280112	0.397449	0.442162	0.19676	0.0680343	0.332356	0.30792	0.0345771	0.268423	0.185402	0.0356482	0.178975	0.169204	0.320037	0.423933	0.432378	0.231351	0.149697	0.255909	0.209953
TCGA-HU-A4GD-01A	0.154089	0.334973	-0.0971456	0.448309	0.388378	0.384188	0.163738	0.263032	0.421594	0.409132	0.355233	0.390958	0.440508	0.430898	0.255873	0.152096	0.144597	-0.0299392	-0.00126013	0.150891	0.225762	0.166158	0.0165563	-0.00490163	0.231874	0.0441903	0.382937	0.200521	0.139986	0.191806	0.271643	0.368423	0.0500088	-0.0570241	0.0951553	0.285375	0.157402	0.0517994	0.164441	-0.0692159	0.0244505	0.0261039	0.220086	0.326749	0.375825	0.0755778	-0.167577	0.156453	0.0476512
TCGA-HU-A4GF-01A	0.356089	0.387275	0.291039	0.481168	0.442841	0.475725	0.265792	0.40795	0.458296	0.441175	0.378825	0.42021	0.460402	0.459753	0.389441	0.291125	0.359732	0.0931708	0.127519	0.33463	0.327445	0.177742	0.17302	0.248789	0.406867	0.245789	0.402777	0.406238	0.415528	0.380978	0.405868	0.445977	0.204948	-0.0427771	0.284166	0.10577	0.344158	0.285568	0.198183	0.0264183	0.204098	0.177556	0.370919	0.452171	0.453475	0.281831	0.255061	0.313598	0.167045
TCGA-HU-A4GH-01A	0.255562	0.380938	0.164037	0.465342	0.427752	0.437963	0.227371	0.351491	0.446872	0.429225	0.375143	0.424911	0.445064	0.453929	0.316751	0.248714	0.308503	0.1329	0.0838587	0.299217	0.356749	0.156101	0.144271	0.190052	0.334284	0.17698	0.341537	0.347508	0.279594	0.298838	0.390986	0.456089	0.16259	0.113145	0.250636	0.225724	0.19817	0.189781	0.200282	0.0266498	0.157285	0.123558	0.323718	0.41851	0.421705	0.231054	0.114649	0.25569	0.141867
TCGA-HU-A4GJ-01A	0.432863	0.382382	0.424632	0.459648	0.477171	0.407312	0.34568	0.434274	0.446801	0.43448	0.365291	0.425011	0.455445	0.458532	0.400212	0.363184	0.449255	0.532641	0.20591	0.290523	0.335198	0.320203	0.314624	0.423408	0.420426	0.389903	0.349349	0.511694	0.434339	0.366485	0.431602	0.411145	0.387994	0.527974	0.365398	0.432885	0.187581	0.506377	0.207182	0.122134	0.353307	0.357437	0.403746	0.473097	0.445256	0.400893	0.392818	0.322624	0.373056
TCGA-HU-A4GP-01A	0.25605	0.377312	0.185512	0.448034	0.478245	0.440616	0.352758	0.374071	0.45076	0.433407	0.379247	0.422913	0.453911	0.457533	0.319748	0.30948	0.280318	0.252392	0.0486692	0.294746	0.281824	0.185858	0.127924	0.163386	0.409998	0.216165	0.298232	0.340613	0.28513	0.28767	0.419615	0.437924	0.177706	0.151757	0.212005	0.331439	0.171018	0.167923	0.195245	0.0209322	0.151888	0.159982	0.315635	0.428664	0.453712	0.203213	0.115175	0.230348	0.135661
TCGA-HU-A4GQ-01A	0.393529	0.375484	0.31438	0.464618	0.496709	0.503739	0.437955	0.459575	0.458694	0.427742	0.361188	0.424627	0.450766	0.449588	0.394184	0.380813	0.377628	0.0359647	0.0602462	0.357358	0.267601	0.148194	0.197036	0.169694	0.413792	0.213117	0.433779	0.438891	0.473768	0.316668	0.413284	0.447453	0.17848	-0.273973	0.350807	0.251987	0.215762	0.244052	0.200807	0.0132873	0.185565	0.174658	0.286234	0.42055	0.433409	0.242219	0.149547	0.269665	0.135864
TCGA-HU-A4GT-01A	0.316309	0.390783	0.279659	0.457719	0.43666	0.472607	0.353088	0.402245	0.458204	0.42942	0.384086	0.428291	0.462804	0.464404	0.374436	0.240673	0.33525	0.10681	0.0390341	0.350987	0.279924	0.188394	0.21581	0.204359	0.412978	0.240305	0.391808	0.389691	0.375863	0.331291	0.359153	0.431552	0.186807	-0.0572143	0.270472	0.234425	0.167297	0.258341	0.177246	0.021023	0.198366	0.171523	0.348621	0.419178	0.416776	0.271678	0.200507	0.295477	0.0666831
TCGA-HU-A4GU-01A	0.291681	0.392817	0.250991	0.443495	0.444116	0.465813	0.382069	0.387289	0.457447	0.432645	0.38605	0.437083	0.465288	0.458742	0.352073	0.198855	0.29323	-0.0315842	0.0807311	0.380166	0.228136	0.127906	0.223421	0.195839	0.397525	0.193617	0.396368	0.331453	0.285721	0.314453	0.339982	0.452155	0.132906	-0.340553	0.297518	0.0823298	0.158192	0.217274	0.188107	0.0159555	0.185686	0.143125	0.304215	0.406775	0.398692	0.265154	0.211292	0.26952	0.0558053
TCGA-HU-A4GX-01A	0.483037	0.386943	0.372341	0.464029	0.460285	0.478225	0.362164	0.418512	0.448156	0.426334	0.374103	0.429221	0.450049	0.455746	0.427792	0.283203	0.485431	0.241187	0.107564	0.321899	0.298138	0.234949	0.306309	0.298485	0.448001	0.344494	0.427526	0.500135	0.52954	0.359473	0.387683	0.44709	0.292044	0.219556	0.41586	0.377471	0.178829	0.404195	0.204732	0.0617486	0.28485	0.267847	0.344674	0.45408	0.442369	0.343593	0.286535	0.3035	0.149911
TCGA-HU-A4GY-01A	0.450113	0.364802	0.401251	0.451915	0.489199	0.477414	0.423376	0.429197	0.432062	0.416229	0.349837	0.417151	0.435952	0.434273	0.40552	0.391116	0.424454	0.486215	0.18399	0.429312	0.335297	0.352009	0.312984	0.393464	0.435578	0.394463	0.414147	0.509832	0.493106	0.386097	0.435816	0.416031	0.373578	0.446608	0.397205	0.287271	0.142512	0.483369	0.224484	0.100797	0.339859	0.335216	0.414429	0.47537	0.438812	0.362843	0.332815	0.334987	0.330728
TCGA-HU-A4H0-01A	0.478967	0.408199	0.390136	0.463621	0.442544	0.425516	0.315209	0.402315	0.467398	0.466988	0.399263	0.455301	0.484556	0.460204	0.440419	0.211969	0.461286	0.107981	0.137942	0.34024	0.253807	0.231629	0.358553	0.317591	0.439314	0.360273	0.378711	0.506421	0.530117	0.365474	0.383968	0.441468	0.275063	0.00535517	0.425409	0.30842	0.132985	0.400587	0.219402	0.0747513	0.304313	0.280932	0.370382	0.473905	0.484643	0.352622	0.268552	0.306389	0.269191
TCGA-HU-A4H2-01A	0.386729	0.387114	0.300479	0.453098	0.445992	0.477295	0.353817	0.362805	0.450138	0.444449	0.385243	0.427734	0.46155	0.467045	0.389325	0.280009	0.367538	0.233865	0.0602987	0.357098	0.260418	0.204698	0.26468	0.244843	0.409407	0.272584	0.302506	0.440111	0.45362	0.316973	0.398044	0.434821	0.241448	0.213153	0.326654	0.394821	0.163861	0.312028	0.19235	0.0271357	0.228902	0.184535	0.363588	0.428556	0.419377	0.267757	0.18335	0.253191	0.143869
TCGA-HU-A4H3-01A	0.44122	0.382547	0.336083	0.434059	0.489246	0.480718	0.388355	0.413383	0.456702	0.417547	0.370083	0.432669	0.450477	0.46144	0.400018	0.246634	0.417923	0.146297	0.0693993	0.335256	0.250196	0.16451	0.216592	0.240626	0.405779	0.266878	0.379413	0.43024	0.444777	0.31542	0.39554	0.459265	0.216626	-0.00958655	0.39088	0.372944	0.219536	0.303759	0.224282	0.0199197	0.231945	0.214944	0.335292	0.45264	0.434249	0.264039	0.182882	0.255178	0.0734202
TCGA-HU-A4H4-01A	0.467128	0.390817	0.400437	0.453729	0.455425	0.475834	0.376737	0.408713	0.453782	0.440872	0.384096	0.438065	0.47064	0.460991	0.453414	0.253741	0.44292	0.299782	0.0919308	0.398443	0.309738	0.287711	0.256765	0.357228	0.437352	0.360173	0.404923	0.496649	0.526828	0.394011	0.412115	0.455139	0.316033	0.274644	0.403276	0.296942	0.274103	0.399883	0.195492	0.0678033	0.298935	0.280186	0.419709	0.466114	0.453694	0.338846	0.304692	0.328867	0.233569
TCGA-HU-A4H5-01A	0.352252	0.379734	0.235563	0.439842	0.461014	0.471765	0.296212	0.372458	0.444401	0.428341	0.373185	0.427869	0.450582	0.449351	0.358461	0.251748	0.297049	0.141311	0.0324939	0.281449	0.279856	0.13115	0.157316	0.19906	0.319393	0.192427	0.296699	0.365564	0.397276	0.301597	0.393427	0.45188	0.173921	0.134803	0.284624	0.12336	0.269294	0.223748	0.187619	0.019655	0.1716	0.131721	0.360873	0.412545	0.417312	0.236007	0.177643	0.251927	0.121766
TCGA-HU-A4H6-01A	0.361204	0.367762	0.277864	0.447121	0.487093	0.460062	0.380992	0.403208	0.436965	0.435875	0.364927	0.430955	0.455529	0.452688	0.382777	0.33133	0.328055	0.354947	0.0951038	0.305452	0.352662	0.207317	0.230207	0.265919	0.389466	0.248798	0.457815	0.426094	0.419981	0.355348	0.434301	0.45822	0.266562	0.378791	0.296616	0.434702	0.329414	0.286311	0.201251	0.0642131	0.227042	0.188211	0.415201	0.446264	0.453298	0.283212	0.244932	0.292158	0.223493
TCGA-HU-A4H8-01A	0.325043	0.39259	0.254817	0.455267	0.427962	0.413542	0.258491	0.320232	0.452479	0.426093	0.376405	0.429484	0.453975	0.460415	0.377617	0.225926	0.295859	0.12328	0.149036	0.359712	0.269958	0.11263	0.174121	0.195656	0.417854	0.245914	0.407358	0.379591	0.398909	0.278386	0.353059	0.428833	0.164115	-0.0705047	0.255309	0.24927	0.037674	0.195478	0.183408	0.0233416	0.169203	0.16018	0.288569	0.429592	0.43178	0.243297	0.194464	0.265772	0.138769
TCGA-HU-A4HB-01A	0.435647	0.36921	0.377236	0.441614	0.468477	0.468248	0.359738	0.405964	0.434786	0.42036	0.353854	0.412206	0.439029	0.446279	0.404762	0.343426	0.435497	0.484594	0.210486	0.370947	0.355569	0.306351	0.282305	0.383631	0.425727	0.357486	0.42918	0.495694	0.474442	0.375058	0.406582	0.427958	0.362567	0.469401	0.378183	0.472421	0.190444	0.435373	0.198726	0.0932265	0.327586	0.344235	0.399857	0.467275	0.443405	0.382023	0.348126	0.326279	0.365781
TCGA-HU-A4HD-01A	0.260011	0.38404	0.248811	0.46213	0.465624	0.479587	0.389631	0.422294	0.45206	0.427617	0.385466	0.423803	0.451138	0.454945	0.328975	0.353695	0.301116	0.112849	0.091392	0.384496	0.273075	0.1522	0.184486	0.203419	0.366657	0.217589	0.325755	0.344591	0.324345	0.31745	0.396223	0.433195	0.18193	-0.0666024	0.215455	0.395921	0.162687	0.198924	0.184341	0.0116121	0.1803	0.152425	0.339552	0.434988	0.431832	0.254618	0.190728	0.251642	0.181051
TCGA-IN-7806-01A	0.145931	0.372995	0.114952	0.456069	0.461831	0.495084	0.36109	0.443658	0.430524	0.401292	0.34916	0.406891	0.425008	0.451823	0.277267	0.355857	0.176126	0.226237	0.0285016	0.366119	0.24241	0.151694	0.11769	0.101541	0.328838	0.180389	0.3215	0.282197	0.173349	0.250371	0.373999	0.448024	0.160543	0.160378	0.115938	0.177759	0.00805922	0.128304	0.171524	-0.0202802	0.132821	0.123332	0.241397	0.437258	0.426563	0.156301	0.0662015	0.181826	0.154277
TCGA-IN-7808-01A	0.432633	0.355302	0.377684	0.421451	0.444862	0.474883	0.284091	0.40886	0.424706	0.418035	0.352895	0.413962	0.43861	0.442699	0.376527	0.317212	0.440664	0.506526	0.226149	0.28632	0.321212	0.304233	0.289088	0.40417	0.376116	0.387034	0.324877	0.506713	0.450363	0.336293	0.406997	0.392661	0.363336	0.491515	0.396629	0.167545	0.0228046	0.488666	0.184239	0.0830129	0.340652	0.342563	0.36766	0.47447	0.445609	0.370533	0.355699	0.298856	0.395319
TCGA-IN-8462-01A	0.292639	0.333582	0.218764	0.448857	0.488624	0.504567	0.429586	0.472148	0.416355	0.382653	0.30692	0.397243	0.402435	0.427936	0.316601	0.393283	0.269429	0.166033	0.105678	0.334803	0.298333	0.180956	0.232622	0.154601	0.397556	0.210065	0.370014	0.37168	0.387731	0.310051	0.42649	0.464378	0.178321	-0.00808605	0.226453	0.436851	0.131654	0.161386	0.202817	0.00168542	0.183629	0.137537	0.352192	0.423648	0.414504	0.243779	0.167624	0.262062	0.174568
TCGA-IN-8663-01A	0.25948	0.392828	0.270653	0.480978	0.486141	0.475081	0.402631	0.375256	0.461123	0.431196	0.381183	0.442158	0.457438	0.444542	0.357501	0.257244	0.228641	-0.00987412	-0.00115737	0.379523	0.226064	0.0797311	0.173202	0.119822	0.452795	0.202074	0.406375	0.301036	0.344784	0.240467	0.340368	0.490706	0.0701208	-0.327909	0.198724	-0.0354083	-0.0721487	0.0798859	0.230188	0.0122453	0.143465	0.131336	0.192709	0.450668	0.442704	0.224726	0.164199	0.206296	0.0621798
TCGA-IN-A6RI-01A	0.0820271	0.387563	0.0795226	0.476845	0.405623	0.445691	0.237392	0.36877	0.452915	0.434041	0.374809	0.430643	0.460622	0.466773	0.283677	0.23158	0.0782973	0.031106	0.0714338	0.321697	0.265903	0.107623	0.0582378	0.111865	0.338445	0.118419	0.389368	0.250245	0.217333	0.268082	0.340005	0.444433	0.0819218	-0.0861037	0.0764204	0.184642	0.0680256	0.112402	0.176145	-0.0481546	0.0992445	0.0651982	0.2968	0.406351	0.418508	0.197225	0.0791129	0.211816	0.202125
TCGA-IN-A6RJ-01A	0.218628	0.341113	0.122589	0.437135	0.418486	0.41706	0.287529	0.303531	0.421108	0.403084	0.3046	0.404811	0.418499	0.439322	0.276637	0.268943	0.213884	0.0480385	0.0101576	0.279791	0.230032	0.0681422	0.0656824	0.0532704	0.287385	0.110676	0.401373	0.336976	0.302935	0.226774	0.315715	0.446302	0.0901026	-0.0430421	0.249061	0.255727	0.0583051	0.102146	0.19271	-0.027989	0.0959281	0.0653735	0.277681	0.399578	0.375338	0.140916	0.0908033	0.168396	0.0801055
TCGA-IN-A6RL-01A	0.256262	0.348807	0.180684	0.444018	0.460475	0.461204	0.338092	0.404521	0.428713	0.404117	0.319694	0.393585	0.419542	0.441492	0.301212	0.329116	0.241415	0.180863	0.035257	0.252318	0.295595	0.136308	0.0769431	0.0964461	0.347402	0.156868	0.391036	0.375562	0.364212	0.272934	0.394913	0.442461	0.171456	0.124482	0.233237	0.340391	0.155569	0.191191	0.195032	-0.000203783	0.103123	0.0921273	0.309297	0.447245	0.425624	0.197562	0.140298	0.231664	0.190388
TCGA-IN-A6RN-01A	0.142509	0.312177	0.0311665	0.436651	0.446585	0.427818	0.280043	0.372683	0.401165	0.361516	0.261982	0.378801	0.37281	0.41352	0.220881	0.2876	0.110962	0.00857669	-0.0325677	0.237412	0.234485	0.0981061	0.104532	0.115196	0.344764	0.0443434	0.285323	0.244328	0.211336	0.228	0.391963	0.452685	0.0533541	-0.186411	0.131295	0.249044	-0.0745659	0.00816291	0.228949	-0.0197453	0.067387	-0.0188068	0.273659	0.426866	0.432991	0.161806	0.0665337	0.199981	-0.0189779
TCGA-IN-A6RO-01A	0.322912	0.398101	0.206887	0.448575	0.404853	0.444064	0.257411	0.362822	0.45897	0.455715	0.416619	0.437805	0.486255	0.46753	0.352367	0.151372	0.271094	0.0388874	0.0256138	0.265768	0.229752	0.186577	0.124641	0.120598	0.350954	0.139872	0.349344	0.373843	0.417516	0.249938	0.360088	0.462739	0.127512	-0.177819	0.261573	0.267099	0.0449021	0.19824	0.187386	-0.0387084	0.147166	0.122206	0.298276	0.449303	0.465123	0.201525	0.18318	0.207397	0.138356
TCGA-IN-A6RR-01A	0.302977	0.344613	0.205159	0.428097	0.449876	0.465592	0.329238	0.41293	0.423875	0.40335	0.335783	0.403071	0.420046	0.439408	0.294344	0.287978	0.319165	0.127183	0.03048	0.259386	0.279034	0.167748	0.0258918	0.0780365	0.338638	0.151825	0.3418	0.35863	0.304325	0.274547	0.412559	0.452732	0.126547	-0.0817797	0.289062	0.362238	0.0717285	0.181305	0.174756	-0.00477355	0.108495	0.111843	0.316719	0.429093	0.425321	0.150218	0.182718	0.243865	0.158528
TCGA-IN-A6RS-01A	0.39641	0.380791	0.325973	0.448651	0.47261	0.478211	0.348113	0.395053	0.449379	0.430047	0.368318	0.427306	0.450542	0.444295	0.408008	0.253728	0.427877	0.120379	0.0981742	0.373027	0.318024	0.152083	0.220801	0.274023	0.388782	0.230368	0.324526	0.458528	0.407123	0.369175	0.409106	0.463223	0.213661	-0.00478597	0.384345	-0.00969341	0.241391	0.339656	0.221512	0.0307601	0.234552	0.183865	0.404047	0.445063	0.446013	0.276044	0.189338	0.30072	0.191204
TCGA-IN-A7NR-01A	0.319613	0.333297	0.13834	0.444508	0.47474	0.461959	0.367938	0.392901	0.428451	0.39478	0.309894	0.395058	0.421621	0.434972	0.317315	0.34758	0.316449	0.269496	0.02324	0.285849	0.266734	0.183626	0.183633	0.173787	0.327637	0.125413	0.392676	0.405766	0.364437	0.283135	0.414201	0.443844	0.202982	0.215767	0.280918	0.375792	0.0591757	0.278991	0.195391	0.0326097	0.168918	0.120324	0.337082	0.41451	0.382881	0.261563	0.145723	0.222014	0.120925
TCGA-IN-A7NT-01A	0.210518	0.373714	0.242736	0.46734	0.47768	0.491589	0.489791	0.350843	0.447177	0.432429	0.355901	0.428391	0.449794	0.443977	0.33457	0.219703	0.171081	-0.0702821	0.0274255	0.385701	0.256954	0.0205445	0.111942	0.0842109	0.274208	0.131201	0.404826	0.28243	0.283547	0.328026	0.351906	0.464827	0.0870967	-0.32266	0.0969175	0.207216	0.126339	-0.0402701	0.216634	0.00653228	0.107328	0.0805779	0.328137	0.425924	0.410881	0.240315	0.129401	0.216435	-0.111929
TCGA-IN-A7NU-01A	0.319098	0.323435	0.33511	0.447129	0.48243	0.499187	0.418662	0.437025	0.422007	0.386632	0.294475	0.398214	0.411957	0.428502	0.36665	0.311473	0.301845	0.143606	0.0731909	0.342591	0.280962	0.230734	0.236484	0.197782	0.402822	0.225311	0.399107	0.441963	0.416479	0.333164	0.386784	0.453579	0.199169	-0.0712681	0.294149	0.372703	0.227012	0.235589	0.221907	0.0299361	0.20069	0.177367	0.383758	0.425842	0.382084	0.270194	0.231399	0.269727	0.142131
TCGA-IN-AB1V-01A	0.202856	0.358476	0.141714	0.44876	0.449668	0.454539	0.313804	0.384475	0.420492	0.39253	0.330344	0.403188	0.401115	0.434223	0.286801	0.371887	0.235133	0.276017	0.0805162	0.302162	0.286431	0.137613	0.123789	0.102577	0.326521	0.174016	0.35258	0.356227	0.268568	0.275885	0.358651	0.437002	0.180457	0.209845	0.227962	0.234148	0.110195	0.194059	0.184503	0.0245696	0.149291	0.122815	0.28772	0.383635	0.351018	0.193539	0.177877	0.223789	0.15949
TCGA-IN-AB1X-01A	0.451951	0.380443	0.390082	0.453569	0.453852	0.473133	0.388446	0.392158	0.447158	0.41474	0.358684	0.419915	0.429811	0.443618	0.424735	0.287109	0.478092	0.323984	0.189329	0.344334	0.367836	0.186094	0.265383	0.309331	0.418362	0.346622	0.484485	0.491858	0.483805	0.386775	0.384587	0.460271	0.307254	0.243262	0.444204	0.302764	0.280602	0.402701	0.20921	0.0684246	0.293499	0.255521	0.386699	0.47055	0.460461	0.334374	0.349095	0.341648	0.219313
TCGA-IP-7968-01A	0.429372	0.38912	0.351703	0.431337	0.5044	0.495926	0.441505	0.457208	0.449842	0.429861	0.380731	0.422607	0.453938	0.451924	0.393428	0.341618	0.41368	0.147797	0.062906	0.292974	0.297625	0.207012	0.308065	0.265316	0.414164	0.275088	0.370463	0.44973	0.485988	0.376093	0.417142	0.475629	0.247701	-0.127753	0.369264	0.368647	0.238199	0.337697	0.208536	0.0262894	0.245684	0.203336	0.366644	0.476136	0.486144	0.306185	0.26442	0.305441	0.185082
TCGA-KB-A6F7-01A	0.444272	0.373652	0.371338	0.417079	0.440258	0.430773	0.282306	0.354444	0.448269	0.432272	0.376034	0.420008	0.465155	0.461249	0.407447	0.267535	0.467233	0.188594	0.13903	0.392781	0.339521	0.202433	0.23439	0.306512	0.383955	0.314067	0.387079	0.477002	0.477195	0.357582	0.378759	0.427142	0.248037	0.162082	0.416843	0.241217	0.154449	0.363311	0.183606	0.0293549	0.268275	0.267979	0.395756	0.467507	0.461911	0.323596	0.245172	0.289312	0.109279
TCGA-KB-A93G-01A	0.205857	0.354557	0.294063	0.457053	0.540495	0.537613	0.553164	0.518574	0.430931	0.400255	0.334298	0.398309	0.41372	0.419593	0.342118	0.396814	0.171355	0.163541	0.0897019	0.388166	0.426337	0.156693	0.230629	0.23697	0.445187	0.255631	0.300042	0.335063	0.282342	0.427996	0.436442	0.486304	0.201005	-0.0732439	0.219308	0.277918	0.438773	0.116164	0.238728	0.0793744	0.190193	0.156913	0.414996	0.463345	0.466266	0.258406	0.190505	0.30978	0.19968
TCGA-KB-A93H-01A	0.308276	0.38817	0.0855422	0.445444	0.401471	0.428862	0.257212	0.346081	0.444698	0.445787	0.399292	0.43074	0.471373	0.466119	0.335192	0.189125	0.356926	-0.0435939	-0.0505835	0.307049	0.268553	0.122386	0.0833379	0.0973612	0.308198	0.103491	0.424344	0.357712	0.424036	0.249558	0.351611	0.414386	0.104668	-0.350996	0.19049	0.0184134	-0.0168044	0.219414	0.185044	-0.021724	0.0869373	0.0578152	0.273899	0.415002	0.412616	0.140429	-0.07584	0.198236	0.0138404
TCGA-KB-A93J-01A	0.455324	0.383198	0.378911	0.409118	0.440604	0.45354	0.33196	0.416051	0.435819	0.434065	0.372336	0.427927	0.451673	0.457348	0.410074	0.28644	0.404065	0.188039	0.119275	0.427237	0.291566	0.255933	0.266318	0.304173	0.471757	0.359176	0.382359	0.470203	0.509232	0.358241	0.384663	0.438781	0.277492	0.0774469	0.38523	0.282353	0.202836	0.35283	0.204326	0.0736678	0.271212	0.251711	0.357357	0.47081	0.44659	0.319856	0.36814	0.298432	0.200221
TCGA-MX-A5UG-01A	0.391503	0.354452	0.353999	0.445248	0.524731	0.532287	0.492264	0.506348	0.421124	0.391148	0.325342	0.395043	0.406689	0.421963	0.373587	0.444601	0.38485	0.453717	0.170803	0.360112	0.388146	0.279199	0.28174	0.337437	0.435165	0.342525	0.320322	0.472865	0.42396	0.425452	0.47116	0.461855	0.344572	0.411058	0.321201	0.466464	0.35431	0.407165	0.218794	0.117867	0.30249	0.306519	0.424199	0.458702	0.440658	0.339876	0.329871	0.348127	0.326646
TCGA-MX-A5UJ-01A	0.353912	0.37893	0.28823	0.441313	0.50462	0.48703	0.447603	0.454453	0.445838	0.41211	0.357832	0.419126	0.444227	0.457229	0.380337	0.402699	0.334853	0.296795	0.0818963	0.323586	0.316148	0.189311	0.229887	0.252385	0.404806	0.233723	0.36885	0.421787	0.426126	0.338433	0.441503	0.455048	0.243961	0.284015	0.2909	0.404191	0.204941	0.241174	0.212303	0.0512353	0.210762	0.196561	0.367699	0.436095	0.416807	0.281342	0.207939	0.272508	0.178625
TCGA-MX-A663-01A	0.270845	0.36424	0.229282	0.435007	0.532367	0.519097	0.469943	0.489126	0.446005	0.419272	0.347686	0.415625	0.442325	0.440795	0.33814	0.450492	0.294365	0.196042	0.0739819	0.364911	0.284673	0.142984	0.243673	0.212398	0.343284	0.19623	0.351118	0.365009	0.316	0.326766	0.470403	0.437918	0.211493	0.156332	0.244709	0.382858	0.147147	0.21011	0.207265	0.0487926	0.195599	0.175523	0.346712	0.448453	0.450972	0.273515	0.126238	0.258906	0.241825
TCGA-MX-A666-01A	0.19174	0.382874	0.241457	0.476965	0.466427	0.440219	0.336278	0.369471	0.459908	0.434108	0.379005	0.414391	0.457962	0.458688	0.323244	0.333564	0.275762	0.418985	0.101829	0.266515	0.28816	0.192634	0.206408	0.282766	0.346374	0.262314	0.361761	0.373356	0.230105	0.327487	0.392461	0.43493	0.251744	0.398587	0.162649	0.394086	0.146306	0.274503	0.189601	0.0395992	0.231581	0.225811	0.3288	0.441532	0.438229	0.322449	0.259519	0.268629	0.276745
TCGA-R5-A7O7-01A	0.317585	0.338297	0.210061	0.450891	0.472902	0.48448	0.370989	0.423725	0.445841	0.407969	0.358711	0.38731	0.441157	0.440427	0.342431	0.249147	0.268048	0.0844765	0.121811	0.285788	0.270226	0.181187	0.186417	0.247746	0.336508	0.173803	0.244239	0.397519	0.381453	0.314431	0.387696	0.467616	0.143472	-0.0402547	0.219548	0.331334	0.121947	0.278867	0.195623	-0.0465246	0.17701	0.105051	0.385962	0.438578	0.453901	0.239828	0.0845862	0.242371	0.156543
TCGA-R5-A7ZE-01B	0.0815424	0.377091	0.0327281	0.47372	0.450446	0.44675	0.371865	0.354214	0.454832	0.432221	0.368627	0.426336	0.459	0.449267	0.273694	0.273204	0.195632	-0.0587389	0.00566656	0.33148	0.215456	0.14118	0.166822	0.0438451	0.335115	0.0444876	0.229842	0.155512	0.139382	0.28902	0.363881	0.474667	0.0416091	-0.364525	0.077986	-0.0105198	0.232848	-0.0259685	0.183134	-0.0318323	0.0898492	-0.0119213	0.266221	0.392822	0.396799	0.161251	-0.0143292	0.220238	0.0452814
TCGA-R5-A7ZF-01A	0.33408	0.387701	0.112288	0.380024	0.431002	0.453629	0.285142	0.35309	0.4513	0.449786	0.398917	0.433024	0.480117	0.459621	0.360396	0.220126	0.290343	0.0169984	0.00946386	0.224037	0.157853	0.101898	0.0675535	0.0153313	0.197271	0.0732759	0.336046	0.347764	0.404763	0.252142	0.336137	0.443426	0.0558685	-0.325309	0.237108	-0.0196708	0.0236879	0.103485	0.179883	-0.054129	0.0534834	0.023354	0.311325	0.424465	0.436204	0.13047	0.034718	0.221205	-0.0191413
TCGA-R5-A7ZI-01A	0.450494	0.35661	0.423362	0.453652	0.41906	0.350782	0.260841	0.386771	0.43939	0.413508	0.356145	0.412489	0.455602	0.465544	0.408882	0.130069	0.477084	0.228612	0.135207	0.300447	0.244656	0.213816	0.250712	0.335825	0.467358	0.377309	0.420156	0.517611	0.476114	0.380045	0.373699	0.425743	0.275463	0.254471	0.428026	0.372036	0.18077	0.422733	0.192476	0.0436186	0.288997	0.280585	0.431797	0.452151	0.421546	0.326112	0.271055	0.306254	0.217162
TCGA-R5-A7ZR-01A	0.274884	0.366962	0.205841	0.423468	0.421165	0.417928	0.304599	0.340094	0.430456	0.437652	0.379943	0.421678	0.465913	0.460737	0.341444	0.245138	0.289644	0.15641	0.121643	0.293789	0.273208	0.139937	0.208496	0.174995	0.364918	0.154164	0.409613	0.372197	0.396467	0.293558	0.382993	0.422742	0.157744	0.113373	0.173025	0.347267	-0.0450096	0.213324	0.16124	0.0116999	0.189332	0.170588	0.310594	0.441336	0.430759	0.258797	0.163043	0.264609	0.0630768
TCGA-R5-A805-01A	0.369336	0.364249	0.309289	0.412023	0.511667	0.499787	0.440328	0.458133	0.430101	0.415256	0.35628	0.402107	0.431029	0.436417	0.40377	0.355469	0.366739	0.151316	0.143472	0.436879	0.465546	0.211477	0.262382	0.309694	0.435908	0.282225	0.474668	0.426538	0.391769	0.446012	0.441309	0.472651	0.277412	0.0965326	0.328873	0.426794	0.482728	0.310673	0.225828	0.116536	0.273099	0.25583	0.407368	0.477949	0.458119	0.319786	0.296046	0.344319	0.207615
TCGA-RD-A7BS-01A	0.334497	0.298037	0.185542	0.410245	0.482419	0.489559	0.434624	0.437698	0.416704	0.372027	0.272758	0.372563	0.403565	0.419824	0.353947	0.340161	0.257661	0.305673	0.0636917	0.337935	0.320866	0.185228	0.21883	0.177896	0.36644	0.172763	0.445438	0.426997	0.468225	0.320891	0.396395	0.461353	0.212988	0.256558	0.302334	0.45019	0.175963	0.20281	0.227189	0.0303083	0.178521	0.117122	0.402269	0.422672	0.401554	0.261811	0.194346	0.258376	0.194415
TCGA-RD-A7BT-01A	0.310595	0.393746	0.21755	0.44397	0.427778	0.415133	0.276119	0.324404	0.457601	0.445225	0.38344	0.442563	0.47621	0.464583	0.35498	0.243194	0.317213	0.0780885	0.0342899	0.267365	0.243664	0.165821	0.155726	0.190666	0.346561	0.162366	0.28056	0.388286	0.369338	0.324849	0.365971	0.432541	0.168549	-0.0267785	0.268509	0.311991	0.194135	0.293408	0.190568	0.00398567	0.170454	0.132239	0.335108	0.418653	0.429769	0.224086	0.141743	0.249339	0.153898
TCGA-RD-A7BW-01A	0.458174	0.317935	0.343691	0.421015	0.516067	0.512727	0.485794	0.508464	0.404262	0.372452	0.281981	0.389126	0.391935	0.405702	0.364223	0.458639	0.455364	0.197197	0.104981	0.335134	0.308143	0.281471	0.269678	0.282778	0.425389	0.311216	0.402288	0.481452	0.485228	0.333305	0.466684	0.433747	0.276567	-0.00401457	0.423742	0.333823	0.142032	0.429227	0.208844	0.0688728	0.272468	0.247578	0.365433	0.441871	0.397732	0.318573	0.30395	0.303114	0.157567
TCGA-RD-A7C1-01A	0.459975	0.328973	0.365803	0.381237	0.442091	0.416716	0.3525	0.344448	0.435658	0.420996	0.357923	0.401183	0.459722	0.442197	0.407115	0.146957	0.443652	0.068019	0.120891	0.361941	0.286629	0.228175	0.138656	0.23053	0.43128	0.284349	0.35027	0.480844	0.508642	0.365653	0.357711	0.412189	0.22716	-0.0934493	0.408641	0.35686	0.353957	0.306496	0.208301	0.0728518	0.227936	0.255584	0.413458	0.439275	0.4134	0.241678	0.241256	0.28413	0.123695
TCGA-RD-A8MV-01A	0.46015	0.366955	0.392585	0.46548	0.476897	0.483534	0.385954	0.428972	0.435845	0.420175	0.358527	0.413943	0.440546	0.451192	0.417269	0.312134	0.457979	0.364535	0.138037	0.390046	0.421341	0.275226	0.254041	0.337651	0.442407	0.368161	0.47947	0.503401	0.481615	0.422154	0.429009	0.449669	0.335334	0.371545	0.434697	0.413103	0.410249	0.396962	0.217281	0.106958	0.299764	0.287838	0.439876	0.469113	0.454474	0.352279	0.339488	0.349158	0.295812
TCGA-RD-A8MW-01A	0.419418	0.36155	0.39005	0.455699	0.52273	0.504985	0.486454	0.479422	0.444547	0.414253	0.3506	0.411927	0.443729	0.441541	0.410818	0.360009	0.409139	0.22903	0.177735	0.428487	0.355336	0.239389	0.2816	0.344476	0.424494	0.324701	0.394336	0.477073	0.493382	0.402452	0.425632	0.479095	0.304657	0.25965	0.367961	0.2485	0.323299	0.363669	0.210127	0.0819117	0.299726	0.254682	0.428128	0.469469	0.451326	0.358141	0.271311	0.285215	0.24236
TCGA-RD-A8N0-01A	0.428974	0.349486	0.359638	0.428447	0.492865	0.419645	0.393777	0.416671	0.419853	0.398983	0.322874	0.403607	0.416825	0.423404	0.378976	0.413621	0.438875	0.467039	0.21272	0.327929	0.349387	0.282466	0.283358	0.351138	0.432335	0.358198	0.369333	0.498479	0.442799	0.350933	0.457622	0.419995	0.351636	0.468815	0.413464	0.497526	0.162438	0.457791	0.207246	0.0847374	0.310032	0.308452	0.394508	0.455078	0.429607	0.339441	0.348844	0.303319	0.293773
TCGA-RD-A8N1-01A	0.444283	0.367536	0.390932	0.424549	0.497674	0.479022	0.399359	0.428957	0.433829	0.420889	0.349344	0.409502	0.44372	0.444893	0.412654	0.353915	0.439315	0.408629	0.159448	0.395421	0.33145	0.292404	0.288155	0.379642	0.433972	0.364996	0.35062	0.505009	0.471372	0.368214	0.424329	0.452692	0.350121	0.39381	0.394595	0.40505	0.171845	0.432102	0.209119	0.0733323	0.314861	0.308103	0.411897	0.471082	0.448234	0.360417	0.371359	0.326898	0.339153
TCGA-RD-A8N2-01A	0.291625	0.334016	0.263404	0.387301	0.511755	0.393059	0.495276	0.397093	0.382349	0.362008	0.26856	0.396573	0.377373	0.401312	0.263586	0.484267	0.349834	0.259205	0.117756	0.268775	0.294275	0.22398	0.196269	0.227701	0.367434	0.264125	0.315461	0.401351	0.291281	0.295505	0.449021	0.403257	0.226087	0.152631	0.310821	0.378592	0.0590532	0.296275	0.206524	0.0363721	0.20541	0.193889	0.305212	0.398448	0.362698	0.228122	0.182413	0.239256	0.116389
TCGA-RD-A8N4-01A	0.377224	0.345393	0.331417	0.420032	0.500865	0.434422	0.45876	0.410851	0.404143	0.377876	0.294713	0.404504	0.394036	0.416876	0.313508	0.474494	0.368409	0.320274	0.127387	0.271943	0.288609	0.258003	0.183693	0.26987	0.385709	0.298885	0.424179	0.445419	0.4212	0.334832	0.469598	0.420226	0.260307	0.256488	0.304625	0.344425	0.133664	0.347855	0.220122	0.0538567	0.240086	0.24432	0.328064	0.416265	0.384614	0.287947	0.312792	0.327255	0.148874
TCGA-RD-A8N5-01A	0.167169	0.350342	0.170785	0.452422	0.525855	0.527213	0.516252	0.492633	0.420633	0.408985	0.337605	0.410991	0.421077	0.433253	0.334354	0.380253	0.219693	0.0941174	0.0737611	0.418226	0.415278	0.188605	0.225992	0.165632	0.393856	0.170248	0.351264	0.309139	0.181001	0.39726	0.442508	0.465159	0.200362	-0.134597	0.286668	0.241109	0.468804	0.119125	0.211786	0.0739044	0.165223	0.101238	0.386947	0.441429	0.435935	0.226543	0.124352	0.264174	0.200942
TCGA-RD-A8N6-01A	0.219781	0.364217	0.162821	0.447317	0.494641	0.479886	0.425527	0.434475	0.445916	0.410236	0.351483	0.412343	0.432697	0.43416	0.304497	0.425123	0.241475	0.0437231	0.0574357	0.351317	0.251293	0.166413	0.19465	0.164002	0.294138	0.166262	0.376617	0.322369	0.316309	0.287132	0.40216	0.430384	0.15889	-0.102633	0.191778	0.207711	0.0623754	0.137413	0.194417	-0.00815993	0.146283	0.125066	0.293585	0.427299	0.421205	0.237965	0.0665007	0.220583	0.0888576
TCGA-RD-A8N9-01A	0.386633	0.362133	0.34488	0.438243	0.509423	0.509302	0.485258	0.495972	0.432168	0.413162	0.35161	0.405648	0.426803	0.429449	0.37072	0.425869	0.383008	0.30473	0.0729218	0.390758	0.296796	0.23827	0.287097	0.330928	0.420874	0.304789	0.37894	0.44975	0.42046	0.369804	0.446079	0.463873	0.283272	0.236587	0.338142	0.464687	0.136752	0.367382	0.229753	0.0629317	0.272966	0.220025	0.385491	0.451393	0.437112	0.312318	0.226608	0.288181	0.208745
TCGA-RD-A8NB-01A	0.450774	0.381864	0.366305	0.449358	0.51019	0.487163	0.433683	0.448763	0.449419	0.415081	0.36579	0.422164	0.447182	0.452635	0.439888	0.394898	0.417198	0.346789	0.112698	0.330922	0.331573	0.291294	0.304067	0.325992	0.433659	0.330388	0.438317	0.494766	0.517282	0.37689	0.448917	0.459739	0.312366	0.281792	0.404395	0.364866	0.304265	0.369908	0.225448	0.0852462	0.29014	0.268477	0.402635	0.453782	0.424002	0.343158	0.260143	0.302649	0.219409
TCGA-SW-A7EA-01A	0.435958	0.372256	0.362145	0.463725	0.500703	0.488806	0.422986	0.412322	0.449357	0.4134	0.362587	0.416091	0.451335	0.460612	0.437941	0.240379	0.434578	0.0796423	0.0465954	0.354105	0.242722	0.161636	0.169517	0.144131	0.43078	0.278223	0.461599	0.466576	0.512905	0.305566	0.373626	0.460849	0.179931	-0.287386	0.420035	0.251002	0.188186	0.284536	0.210768	-0.0209729	0.198408	0.202088	0.345299	0.4487	0.435728	0.260963	0.244492	0.293995	0.00730066
TCGA-SW-A7EB-01A	0.316156	0.329396	0.197852	0.429563	0.463206	0.440715	0.354425	0.381282	0.430397	0.408323	0.32118	0.399423	0.438563	0.443128	0.322408	0.327654	0.360616	0.321182	0.110429	0.250399	0.269346	0.158831	0.175599	0.249841	0.309084	0.203638	0.343439	0.430727	0.350711	0.283812	0.391102	0.406499	0.211349	0.249088	0.315447	0.337086	-0.00260936	0.289928	0.162963	-0.0158839	0.205666	0.200983	0.351584	0.436225	0.434631	0.272563	0.190937	0.241063	0.194095
TCGA-VQ-A8DT-01A	0.295084	0.380334	0.1885	0.42861	0.430737	0.414358	0.338994	0.328943	0.446365	0.439503	0.368225	0.424718	0.457326	0.459584	0.340921	0.272441	0.328503	0.136243	0.0397855	0.241999	0.284854	0.146651	0.14528	0.181224	0.391963	0.176622	0.336437	0.347144	0.30292	0.310987	0.389465	0.439909	0.150727	-0.00859113	0.267168	0.420049	0.157366	0.224298	0.183299	0.00658509	0.156275	0.132377	0.316372	0.413082	0.412795	0.22397	0.164177	0.267922	0.0994541
TCGA-VQ-A8DU-01A	0.317361	0.373655	0.208627	0.483203	0.48332	0.469479	0.434196	0.416484	0.456213	0.421167	0.367346	0.422312	0.450699	0.441511	0.346794	0.341977	0.350151	0.147009	0.10899	0.27825	0.284584	0.162249	0.16455	0.217061	0.350443	0.171152	0.381887	0.38122	0.390442	0.281145	0.359845	0.437848	0.182386	0.046836	0.285598	0.330912	0.102445	0.229642	0.205064	0.00563586	0.179729	0.154072	0.342536	0.422613	0.429169	0.25946	0.189997	0.250971	0.177898
TCGA-VQ-A8DV-01A	0.20179	0.371558	0.00638433	0.440397	0.464451	0.418553	0.305567	0.334564	0.449138	0.435208	0.382836	0.432891	0.454289	0.441058	0.308046	0.307972	0.251492	0.0287422	-0.0521388	0.28871	0.252158	0.0654552	0.0818094	0.0456095	0.27102	0.103116	0.255926	0.251979	0.324996	0.246139	0.345329	0.415187	0.0912185	-0.0487374	0.212131	0.284437	0.177409	0.0838842	0.202356	-0.0771017	0.0733778	0.0503187	0.295992	0.401788	0.428235	0.139588	0.00423379	0.226581	0.156016
TCGA-VQ-A8DZ-01A	0.291675	0.373363	0.137658	0.432591	0.482149	0.473325	0.383918	0.408531	0.439854	0.41846	0.359736	0.414377	0.446985	0.452204	0.329903	0.331274	0.360987	0.0341662	0.0517655	0.387587	0.313769	0.140002	0.249686	0.15057	0.33854	0.142749	0.328218	0.339604	0.342809	0.314008	0.379481	0.466078	0.171722	-0.0455561	0.234014	0.356104	0.280432	0.164142	0.186645	0.00148953	0.174951	0.1392	0.345276	0.424043	0.438295	0.263343	0.0967222	0.232915	0.201144
TCGA-VQ-A8E0-01A	0.257205	0.377311	0.271899	0.458219	0.448474	0.416467	0.272751	0.33272	0.442286	0.428644	0.359951	0.425026	0.449933	0.451063	0.355934	0.277991	0.219936	0.148862	0.116606	0.364935	0.330582	0.199447	0.214356	0.268401	0.391552	0.216046	0.336096	0.36432	0.325346	0.353005	0.400865	0.463456	0.194507	-0.0956872	0.227826	0.244188	0.272816	0.209111	0.193844	0.03451	0.208468	0.176016	0.347789	0.450121	0.447105	0.300504	0.233411	0.28677	0.159383
TCGA-VQ-A8E2-01A	0.371265	0.374237	0.298398	0.479339	0.508928	0.507045	0.461869	0.464603	0.465191	0.420018	0.357021	0.413486	0.450559	0.435713	0.365271	0.385639	0.386866	0.0746823	0.119639	0.299967	0.239187	0.183876	0.246847	0.245246	0.354438	0.206712	0.308584	0.395351	0.433023	0.309052	0.389004	0.450722	0.188204	-0.115089	0.316341	0.23868	0.00940903	0.239758	0.217008	-0.0195113	0.217147	0.177899	0.333976	0.452357	0.46862	0.299391	0.218217	0.246465	0.190753
TCGA-VQ-A8E3-01A	0.475855	0.392178	0.370985	0.405537	0.42804	0.452357	0.335562	0.363584	0.451197	0.439766	0.382573	0.425977	0.466995	0.462986	0.431255	0.167825	0.444506	0.135535	0.0509266	0.273807	0.35455	0.213325	0.181699	0.249316	0.445545	0.356384	0.444815	0.493716	0.518367	0.352689	0.347175	0.447813	0.238121	0.0540297	0.448096	0.186854	0.183234	0.364311	0.185818	-0.0144656	0.244062	0.250291	0.3699	0.446898	0.460053	0.277525	0.285803	0.341462	0.139695
TCGA-VQ-A8E7-01B	0.237296	0.370136	0.178638	0.433703	0.4796	0.492677	0.40228	0.435567	0.446544	0.429915	0.376461	0.410961	0.446594	0.443263	0.318363	0.31998	0.254647	0.0180358	0.0610026	0.301685	0.248418	0.116489	0.166306	0.120085	0.360404	0.13807	0.326261	0.326225	0.337306	0.32903	0.376584	0.473479	0.133432	-0.264657	0.169479	0.334304	0.173772	0.0958103	0.204015	-0.0182157	0.129893	0.0728311	0.318175	0.442465	0.453297	0.195603	0.118088	0.265915	0.123829
TCGA-VQ-A8P2-01A	0.26198	0.388984	0.188989	0.426378	0.435697	0.453185	0.277521	0.379874	0.46193	0.425189	0.377207	0.430744	0.459114	0.463677	0.324333	0.189416	0.241153	-0.013508	0.0712237	0.278424	0.18587	0.115348	0.197948	0.138434	0.373726	0.182608	0.28951	0.298675	0.276572	0.238767	0.326049	0.461334	0.0801668	-0.142957	0.234569	0.123541	-0.0662902	0.157102	0.172167	-0.0483763	0.12922	0.0943394	0.26479	0.426692	0.437453	0.23421	0.160399	0.233969	0.0745671
TCGA-VQ-A8P3-01A	0.41336	0.379945	0.3433	0.467091	0.495424	0.49318	0.413748	0.451247	0.449217	0.435942	0.372012	0.430211	0.449939	0.451261	0.383593	0.330574	0.42608	0.0588678	0.129983	0.27427	0.242681	0.145735	0.263242	0.241945	0.345987	0.229478	0.322851	0.427837	0.401479	0.294696	0.402846	0.47022	0.197108	-0.292321	0.384041	0.359581	0.132904	0.307484	0.216696	-0.038004	0.224919	0.176961	0.290791	0.450299	0.46041	0.301137	0.159578	0.253663	0.187099
TCGA-VQ-A8P5-01A	0.347618	0.386606	0.304972	0.458753	0.484998	0.501161	0.440952	0.444694	0.454424	0.447018	0.389612	0.428416	0.472996	0.460919	0.381135	0.280295	0.319296	0.0487931	0.084032	0.344739	0.289519	0.171304	0.171867	0.170206	0.410355	0.210291	0.429065	0.41033	0.406518	0.319776	0.361461	0.47569	0.18267	-0.0989687	0.347537	0.208272	0.222026	0.191627	0.203199	-0.00483399	0.169749	0.141621	0.386055	0.450408	0.449308	0.260086	0.265269	0.25917	0.0669828
TCGA-VQ-A8P8-01A	0.29687	0.358961	0.275772	0.450527	0.50181	0.473223	0.437449	0.424421	0.434622	0.411176	0.337337	0.408247	0.430292	0.436954	0.352404	0.401725	0.307524	0.405319	0.16552	0.259939	0.296296	0.219396	0.210455	0.302395	0.415618	0.264652	0.401389	0.419623	0.3304	0.340822	0.429391	0.456064	0.274183	0.388162	0.259014	0.483297	0.120478	0.333859	0.190276	0.0453655	0.237039	0.222432	0.380086	0.440957	0.443125	0.309426	0.282195	0.299458	0.215842
TCGA-VQ-A8PB-01A	0.407514	0.408179	0.320413	0.458233	0.4964	0.492321	0.437183	0.423177	0.46517	0.451776	0.397953	0.445527	0.47246	0.458044	0.412829	0.276019	0.384613	0.133908	0.0479218	0.34852	0.29284	0.105539	0.228941	0.236094	0.378552	0.250442	0.279622	0.415045	0.436869	0.343483	0.408922	0.453078	0.218957	0.0311045	0.366825	0.199832	0.299459	0.323439	0.205045	0.0376355	0.228678	0.206618	0.355295	0.422723	0.428975	0.304591	0.277429	0.28004	0.108211
TCGA-VQ-A8PC-01A	0.301606	0.366487	0.303038	0.454596	0.485904	0.453957	0.406337	0.395185	0.437725	0.417487	0.351772	0.400647	0.426719	0.431403	0.358546	0.361607	0.303203	0.360775	0.125543	0.368086	0.351033	0.272895	0.210633	0.269161	0.427623	0.298516	0.473744	0.429966	0.374481	0.366621	0.423459	0.459683	0.288438	0.324437	0.299546	0.442287	0.264411	0.303549	0.211662	0.0659416	0.240146	0.219844	0.344487	0.461365	0.438421	0.271484	0.29044	0.317356	0.264278
TCGA-VQ-A8PD-01A	0.442627	0.361624	0.351516	0.450189	0.515466	0.474453	0.443841	0.440951	0.432099	0.404022	0.342032	0.402092	0.418528	0.428913	0.402097	0.380949	0.422965	0.434457	0.168839	0.364642	0.360754	0.292554	0.252617	0.352126	0.436422	0.340712	0.37133	0.494651	0.482775	0.404625	0.432983	0.460373	0.342104	0.398519	0.406671	0.392938	0.304072	0.422049	0.209846	0.096608	0.28952	0.265999	0.419029	0.465022	0.446485	0.345366	0.35856	0.343052	0.341657
TCGA-VQ-A8PE-01A	0.386939	0.387064	0.333393	0.476745	0.480963	0.477499	0.390134	0.414298	0.456341	0.43656	0.386851	0.428748	0.465772	0.449719	0.392794	0.307211	0.387521	0.335285	0.136341	0.354706	0.322459	0.214304	0.231964	0.307331	0.3892	0.31011	0.351984	0.433668	0.439072	0.37003	0.386952	0.452882	0.275713	0.300955	0.301406	0.300795	0.162377	0.332737	0.20294	0.0367398	0.267101	0.273869	0.384453	0.443535	0.456309	0.316374	0.286671	0.300229	0.261774
TCGA-VQ-A8PF-01A	0.494454	0.385027	0.405474	0.446022	0.479046	0.444945	0.415081	0.449042	0.447592	0.437489	0.371486	0.42843	0.459709	0.453151	0.445147	0.309973	0.495337	0.328414	0.171108	0.417457	0.334953	0.322383	0.289499	0.362757	0.456865	0.395259	0.40247	0.519829	0.524158	0.413632	0.415443	0.44907	0.347637	0.289445	0.466462	0.423028	0.251656	0.419846	0.215219	0.100287	0.32535	0.323334	0.417492	0.492865	0.487866	0.330062	0.306278	0.322346	0.313274
TCGA-VQ-A8PH-01A	0.340726	0.383767	0.234644	0.470706	0.449178	0.421338	0.324178	0.352495	0.460928	0.442442	0.385868	0.420543	0.471654	0.458106	0.357415	0.262739	0.388275	0.241625	0.0792467	0.242066	0.246944	0.179675	0.22875	0.276459	0.297545	0.225818	0.28104	0.423072	0.355139	0.279353	0.367266	0.422446	0.209089	0.201595	0.298174	0.381599	-0.10236	0.352478	0.193192	-0.0185924	0.230621	0.20339	0.317777	0.42534	0.438048	0.292846	0.124514	0.235053	0.21566
TCGA-VQ-A8PJ-01A	0.208816	0.376352	0.0852336	0.404457	0.451757	0.464115	0.352812	0.405564	0.439183	0.417359	0.366025	0.418177	0.442067	0.453431	0.303121	0.29771	0.273682	0.0742515	0.031275	0.311456	0.305359	0.122085	0.183728	0.109055	0.347882	0.106498	0.358613	0.298762	0.329321	0.307242	0.387777	0.467649	0.121062	-0.101193	0.180291	0.203916	0.070626	0.15727	0.182373	-0.00787705	0.149782	0.0927454	0.322956	0.425319	0.440018	0.225922	0.102964	0.230313	0.214502
TCGA-VQ-A8PK-01A	0.373943	0.380257	0.298718	0.482972	0.475836	0.498238	0.430159	0.432975	0.454207	0.422726	0.362241	0.408755	0.446391	0.454096	0.360979	0.296851	0.399206	0.080184	0.0874674	0.338052	0.295528	0.155535	0.207733	0.161467	0.400698	0.234885	0.426106	0.401558	0.438074	0.340124	0.380507	0.490532	0.181392	-0.201772	0.33573	0.258948	0.0432674	0.183168	0.22719	0.0227612	0.209352	0.218308	0.323142	0.456138	0.4538	0.304063	0.244832	0.293772	0.138923
TCGA-VQ-A8PM-01A	0.388459	0.361087	0.329032	0.472633	0.499536	0.483168	0.416773	0.449931	0.430971	0.41508	0.339892	0.412739	0.427128	0.439774	0.367117	0.382652	0.371484	0.373972	0.190037	0.334914	0.34561	0.267999	0.2568	0.331913	0.411623	0.307494	0.367829	0.459063	0.436927	0.357192	0.441666	0.450535	0.294702	0.382144	0.340562	0.465498	0.118511	0.382454	0.203814	0.082056	0.269733	0.242503	0.400911	0.459962	0.45044	0.343246	0.302105	0.306192	0.294881
TCGA-VQ-A8PO-01A	0.463845	0.396226	0.388069	0.459117	0.478656	0.483709	0.424805	0.423019	0.455011	0.433371	0.386365	0.431173	0.463883	0.469705	0.440823	0.259274	0.45076	0.354903	0.124249	0.382815	0.278416	0.242141	0.263429	0.327731	0.432311	0.327346	0.373798	0.49572	0.51038	0.380265	0.385043	0.435712	0.309408	0.328667	0.40502	0.195125	0.10575	0.397437	0.205211	0.0639894	0.288053	0.269045	0.384439	0.462551	0.441399	0.331551	0.26058	0.328087	0.233633
TCGA-VQ-A8PP-01A	0.437694	0.386898	0.358452	0.463562	0.490284	0.495576	0.442013	0.414387	0.452432	0.413341	0.350079	0.422234	0.438735	0.450575	0.403342	0.303676	0.416029	0.304207	0.0749809	0.350145	0.273811	0.197719	0.225693	0.270438	0.427909	0.302428	0.365488	0.452289	0.475781	0.354124	0.396547	0.476084	0.260038	0.218897	0.368683	0.302786	0.210506	0.339061	0.202946	0.0611056	0.244478	0.21948	0.352237	0.450505	0.431336	0.300534	0.2272	0.260987	0.177238
TCGA-VQ-A8PQ-01A	0.413419	0.35966	0.360411	0.455546	0.471486	0.499245	0.38393	0.457243	0.420254	0.408401	0.336468	0.406851	0.419777	0.431282	0.374186	0.378533	0.430193	0.515739	0.199005	0.356969	0.357053	0.379343	0.312118	0.394849	0.42379	0.381779	0.442792	0.50499	0.451721	0.365109	0.448207	0.440243	0.377147	0.474508	0.356613	0.387898	0.0718679	0.494654	0.208008	0.103802	0.338276	0.32833	0.379234	0.475232	0.434542	0.366987	0.314012	0.305749	0.349073
TCGA-VQ-A8PU-01A	0.128005	0.373358	-0.0584634	0.442139	0.437912	0.431754	0.268047	0.361521	0.440304	0.429322	0.36265	0.406575	0.438846	0.454995	0.269458	0.232842	0.100992	-0.0383029	-0.0548197	0.232934	0.289516	0.112478	0.155086	0.00794623	0.286968	0.0213911	0.252062	0.207721	0.166417	0.277087	0.373804	0.452703	0.0376884	-0.296188	0.162341	0.187226	0.186175	-0.00743605	0.16866	0.00342045	0.0537387	-0.0200157	0.228953	0.438696	0.451653	0.1419	-0.119384	0.202299	-0.0072428
TCGA-VQ-A8PX-01A	0.334794	0.38064	0.228647	0.458175	0.422919	0.421909	0.211618	0.339565	0.443417	0.414503	0.360956	0.417141	0.439825	0.455412	0.356434	0.226074	0.342228	0.188575	0.15224	0.275033	0.340935	0.165917	0.225711	0.251681	0.378475	0.225153	0.370113	0.416746	0.39847	0.320134	0.399382	0.428268	0.202852	0.156719	0.287705	0.196048	0.249804	0.313792	0.182675	0.0206866	0.200162	0.145525	0.313092	0.435245	0.433959	0.269653	0.213406	0.284181	0.211336
TCGA-VQ-A91A-01A	0.224265	0.380229	0.264507	0.442409	0.527222	0.48489	0.518886	0.470824	0.442429	0.439186	0.379533	0.415244	0.451564	0.448057	0.367686	0.366451	0.217465	0.134052	0.0808601	0.424897	0.386423	0.178226	0.228271	0.214331	0.410729	0.212527	0.312571	0.333464	0.31091	0.413201	0.433973	0.46808	0.201867	-0.0257338	0.269908	0.166951	0.367516	0.154475	0.216824	0.0705663	0.18875	0.137749	0.395928	0.46794	0.466214	0.250101	0.148438	0.275717	0.205298
TCGA-VQ-A91D-01A	0.410356	0.38633	0.364065	0.454664	0.477492	0.482718	0.43478	0.422901	0.448666	0.418906	0.363734	0.425056	0.445437	0.449361	0.427238	0.253985	0.34861	0.162238	0.112209	0.362625	0.300189	0.144403	0.249787	0.242131	0.428521	0.274143	0.420773	0.443605	0.479785	0.357844	0.38088	0.462117	0.214378	-0.0822303	0.352931	0.209292	0.31923	0.265789	0.208699	0.0560227	0.250167	0.251763	0.347966	0.459118	0.451955	0.302708	0.200674	0.278879	0.202637
TCGA-VQ-A91E-01A	0.413496	0.389021	0.318183	0.453761	0.433364	0.424608	0.279434	0.342942	0.455813	0.434967	0.378233	0.42143	0.455536	0.461042	0.406146	0.238453	0.42012	0.321498	0.154646	0.275775	0.33463	0.161818	0.264004	0.297593	0.414904	0.292756	0.331848	0.44928	0.437343	0.336536	0.400131	0.443592	0.275529	0.317412	0.383573	0.309025	0.247804	0.35047	0.188334	0.0393222	0.259449	0.231848	0.34467	0.456575	0.450868	0.3205	0.268835	0.291914	0.154105
TCGA-VQ-A91K-01A	0.37202	0.373569	0.337123	0.424603	0.501022	0.490014	0.420698	0.431872	0.436943	0.407216	0.352903	0.414271	0.432178	0.448795	0.394214	0.330851	0.353536	0.170263	0.100344	0.384839	0.29342	0.250529	0.272111	0.302502	0.425483	0.278393	0.446722	0.423877	0.413269	0.34005	0.392122	0.452425	0.244721	-0.0427797	0.309091	0.321094	0.179172	0.31361	0.210363	0.0545512	0.249062	0.220736	0.355788	0.452627	0.428256	0.301938	0.21747	0.247723	0.226624
TCGA-VQ-A91N-01A	0.336702	0.391266	0.240516	0.461714	0.452245	0.46117	0.326262	0.404589	0.456665	0.444552	0.379338	0.421549	0.456239	0.459919	0.345763	0.306724	0.314865	0.25251	0.128741	0.253121	0.275445	0.122729	0.180315	0.211193	0.398227	0.247958	0.315972	0.395225	0.403792	0.288625	0.415302	0.439692	0.205863	0.180975	0.285894	0.287308	0.0682529	0.286981	0.195235	0.040067	0.188852	0.148428	0.294361	0.438983	0.438946	0.24004	0.168285	0.241549	0.0880803
TCGA-VQ-A91Q-01A	0.231699	0.365214	0.178905	0.457255	0.475988	0.503495	0.445645	0.467793	0.441654	0.412163	0.34143	0.402502	0.424064	0.438248	0.311822	0.349606	0.152684	0.0976833	0.0893348	0.30813	0.261949	0.152643	0.22454	0.180871	0.3957	0.163953	0.399707	0.286119	0.368989	0.323645	0.408271	0.466441	0.140942	-0.138597	0.194663	0.405676	0.0823091	0.12099	0.241697	0.0224532	0.154702	0.0912123	0.304986	0.437043	0.437395	0.253975	0.171728	0.271174	0.198958
TCGA-VQ-A91S-01A	0.426991	0.394652	0.346716	0.465042	0.451547	0.469133	0.325755	0.40971	0.454647	0.43962	0.383807	0.428744	0.4588	0.450625	0.407867	0.288252	0.447395	0.152237	0.107075	0.310332	0.316198	0.187537	0.256367	0.249101	0.456421	0.318264	0.385207	0.461871	0.48725	0.344684	0.380396	0.421811	0.241803	-0.162594	0.377594	-0.14214	0.287649	0.356425	0.195825	0.0109735	0.249399	0.237713	0.341379	0.455281	0.482344	0.288075	0.2503	0.283425	0.185329
TCGA-VQ-A91U-01A	0.440723	0.372282	0.342143	0.440306	0.449198	0.467174	0.338501	0.407527	0.440139	0.423333	0.354844	0.412731	0.444404	0.444755	0.396982	0.255126	0.436722	0.180889	0.0837888	0.337669	0.268988	0.204335	0.236923	0.280177	0.420013	0.27277	0.346633	0.469038	0.483572	0.330808	0.396495	0.440301	0.244616	0.168596	0.341083	0.154422	0.121361	0.364342	0.1824	0.020294	0.233159	0.190881	0.331538	0.449593	0.447968	0.283367	0.229308	0.287148	0.172221
TCGA-VQ-A91V-01A	0.229161	0.375908	0.0996099	0.471858	0.429984	0.446443	0.307857	0.370742	0.437233	0.420623	0.369082	0.422386	0.436233	0.448758	0.298653	0.274101	0.260789	0.182483	0.0556353	0.236217	0.278584	0.17703	0.125582	0.0920284	0.341637	0.136394	0.438459	0.319027	0.263417	0.257699	0.398318	0.466537	0.135644	0.0151606	0.217769	0.249407	0.109838	0.149181	0.193675	0.0252188	0.117165	0.0967405	0.269404	0.426765	0.421264	0.167203	0.133394	0.227887	0.130215
TCGA-VQ-A91X-01A	0.168038	0.388563	0.00721275	0.475769	0.368738	0.386734	0.201456	0.284728	0.455202	0.441029	0.386498	0.441584	0.456621	0.451071	0.261868	0.13061	0.143575	0.0150897	0.0580792	0.21434	0.222261	0.0863575	0.109086	0.0711149	0.232154	-0.00513195	0.158023	0.262009	0.212277	0.202145	0.301308	0.395782	0.0432508	-0.0130631	0.139401	0.0944714	-0.150478	0.0642744	0.175531	-0.0684448	0.0553407	-0.0135688	0.245351	0.388921	0.417926	0.122757	-0.1152	0.131229	0.0462884
TCGA-VQ-A91Y-01A	0.386619	0.364191	0.34216	0.418003	0.521096	0.495283	0.474199	0.471345	0.430976	0.408741	0.345964	0.414221	0.426659	0.432601	0.392515	0.439065	0.372399	0.314014	0.204692	0.362917	0.290105	0.257915	0.267481	0.328179	0.415203	0.32872	0.426557	0.465877	0.435294	0.344965	0.427113	0.473234	0.296951	0.265614	0.360427	0.393556	0.0911932	0.377274	0.20379	0.0684685	0.292429	0.261625	0.368632	0.456865	0.433547	0.326437	0.330897	0.288948	0.247975
TCGA-VQ-A91Z-01A	0.0844838	0.393023	0.0863234	0.411397	0.445076	0.418909	0.319344	0.308004	0.45049	0.435697	0.378579	0.423412	0.455075	0.460289	0.245806	0.209235	0.175729	-0.00293513	0.0291814	0.248407	0.148116	0.0227857	0.101267	0.0413395	0.156464	0.0466647	0.308809	0.167987	0.184418	0.220209	0.329822	0.435771	0.0234288	-0.307728	0.0512863	-0.0240341	-0.0662406	-0.0526491	0.170122	-0.0557232	0.0470472	-0.00415914	0.234587	0.36525	0.357563	0.185909	0.107061	0.210592	0.0101463
TCGA-VQ-A922-01A	0.253506	0.378234	0.212558	0.492735	0.512867	0.500396	0.471488	0.461403	0.465419	0.42188	0.368714	0.415169	0.444061	0.447329	0.333013	0.372552	0.2236	0.192613	0.0469093	0.303842	0.262699	0.116508	0.213934	0.173748	0.35804	0.192144	0.377287	0.332645	0.373097	0.33199	0.415813	0.470518	0.170269	0.0544041	0.159769	0.324155	0.0616997	0.148166	0.192825	-0.00451234	0.172258	0.14649	0.324341	0.468639	0.483796	0.279869	0.174775	0.275699	0.18831
TCGA-VQ-A923-01A	0.492796	0.384066	0.37697	0.440766	0.466137	0.450632	0.370467	0.438732	0.446166	0.444237	0.374344	0.433289	0.460764	0.454175	0.430913	0.305144	0.481603	0.352431	0.152549	0.382084	0.324842	0.281163	0.287652	0.355948	0.439744	0.37038	0.363255	0.518668	0.531518	0.370758	0.440464	0.438295	0.336345	0.318889	0.446024	0.445625	0.165715	0.433482	0.20846	0.0868283	0.312625	0.295435	0.410662	0.489748	0.483641	0.335134	0.267934	0.29296	0.307382
TCGA-VQ-A924-01A	0.398456	0.387257	0.365547	0.428931	0.490304	0.486731	0.421069	0.43438	0.457321	0.425481	0.375335	0.423596	0.455529	0.452815	0.432041	0.261375	0.413964	0.109665	0.096991	0.367802	0.254783	0.205433	0.238042	0.276645	0.450094	0.290541	0.450242	0.467368	0.468417	0.346676	0.372298	0.449531	0.230054	-0.171488	0.400124	0.130434	0.191804	0.316742	0.200514	0.0126832	0.249881	0.224701	0.359	0.471562	0.455223	0.310676	0.270912	0.286058	0.130796
TCGA-VQ-A925-01A	0.318779	0.37649	0.189142	0.465816	0.481323	0.439804	0.315647	0.384306	0.447661	0.421314	0.373007	0.410879	0.447211	0.444526	0.330714	0.343061	0.314819	0.18008	0.0399461	0.267104	0.248218	0.144749	0.219569	0.206511	0.396003	0.190397	0.355108	0.370996	0.362315	0.269993	0.408489	0.471159	0.190531	0.0502042	0.268758	0.362906	0.0289399	0.277322	0.203154	0.0125126	0.208623	0.156986	0.317924	0.438791	0.436162	0.243144	0.178499	0.241264	0.191215
TCGA-VQ-A927-01A	0.31124	0.361638	0.196389	0.437679	0.484524	0.459395	0.407461	0.410068	0.424575	0.411037	0.344602	0.407463	0.421368	0.438119	0.32889	0.371574	0.298588	0.182488	0.113405	0.259315	0.303698	0.158526	0.187267	0.221322	0.404084	0.215022	0.357915	0.368948	0.352789	0.340275	0.418107	0.451953	0.20439	0.140453	0.281182	0.214644	0.179649	0.241771	0.197391	0.0338138	0.185088	0.139467	0.341441	0.443532	0.447106	0.244865	0.203498	0.271413	0.230282
TCGA-VQ-A928-01A	0.223708	0.379717	0.23461	0.434171	0.503995	0.496482	0.4503	0.458928	0.450568	0.429576	0.366149	0.412407	0.445967	0.461451	0.335801	0.34321	0.200107	0.126025	0.135416	0.349118	0.264677	0.153383	0.176566	0.226067	0.373737	0.203817	0.280995	0.341107	0.27414	0.34195	0.418131	0.471431	0.174047	-0.0322772	0.216022	0.388765	0.226453	0.164891	0.206212	0.0271452	0.171138	0.133728	0.347315	0.457856	0.46089	0.246537	0.142432	0.217785	0.160191
TCGA-VQ-A92D-01A	0.291748	0.382545	0.203231	0.450443	0.489819	0.48207	0.403936	0.433247	0.447577	0.43968	0.361674	0.429748	0.449877	0.448782	0.343673	0.28295	0.246892	0.0251919	0.0291289	0.267033	0.24737	0.128454	0.124772	0.0924642	0.369546	0.163649	0.413424	0.316769	0.388166	0.290589	0.365825	0.468119	0.105647	-0.111085	0.219313	0.14285	-0.105352	0.115796	0.199975	-0.0115205	0.134439	0.164754	0.287821	0.451198	0.463067	0.201013	0.0893424	0.235417	0.112648
TCGA-VQ-A94O-01A	0.371024	0.387731	0.273638	0.492885	0.481125	0.441669	0.33836	0.372128	0.459023	0.435614	0.385875	0.425129	0.45892	0.450625	0.371307	0.287821	0.350032	0.0805337	0.124914	0.245606	0.302802	0.196518	0.255055	0.297342	0.357542	0.247655	0.297896	0.401917	0.402876	0.330614	0.374758	0.448834	0.200261	0.0026645	0.305492	0.198099	0.0659721	0.344664	0.176234	0.00772641	0.245679	0.227857	0.337237	0.448959	0.488056	0.31336	0.216802	0.270288	0.180524
TCGA-VQ-A94P-01A	0.390936	0.347751	0.316994	0.40857	0.516238	0.452365	0.479742	0.429671	0.409654	0.392598	0.299111	0.402744	0.397578	0.415767	0.344255	0.477941	0.37986	0.28652	0.15706	0.323454	0.324657	0.210875	0.228151	0.285111	0.401473	0.299459	0.365333	0.443572	0.429858	0.364125	0.486616	0.409507	0.264467	0.159014	0.353843	0.375228	0.201986	0.352513	0.230287	0.0703967	0.251619	0.226909	0.347925	0.431174	0.398471	0.272711	0.197915	0.299038	0.256188
TCGA-VQ-A94R-01A	0.350844	0.376656	0.303473	0.419004	0.460125	0.4759	0.418341	0.426496	0.448919	0.429705	0.36676	0.420266	0.449565	0.441943	0.364397	0.34916	0.331822	0.184942	0.107112	0.323271	0.2778	0.235757	0.211188	0.257277	0.408691	0.269229	0.367915	0.425588	0.425901	0.313789	0.40319	0.44717	0.232622	0.0894341	0.280625	0.302824	0.0109704	0.28889	0.191418	0.0250723	0.218795	0.214694	0.318671	0.452864	0.442199	0.268223	0.191667	0.257297	0.21061
TCGA-VQ-A94T-01A	0.247807	0.401233	0.230401	0.452608	0.471399	0.478955	0.38838	0.399013	0.454021	0.446304	0.39513	0.43969	0.462221	0.462015	0.31605	0.297948	0.247024	0.0778069	0.0258985	0.299591	0.255444	0.0594766	0.0926262	0.0644174	0.324618	0.186435	0.226211	0.268387	0.224839	0.273387	0.39917	0.472746	0.10788	-0.242529	0.296177	-0.00911366	0.165759	0.067365	0.202714	-0.0168927	0.142975	0.14008	0.255068	0.429251	0.434542	0.175631	0.0580149	0.184433	0.126315
TCGA-VQ-A94U-01A	0.172688	0.381309	0.0335022	0.417759	0.467236	0.45549	0.399086	0.397899	0.43274	0.445302	0.369581	0.427706	0.452489	0.448887	0.274308	0.379148	0.164534	0.0469234	0.0109764	0.215996	0.246479	0.105761	0.104998	0.085216	0.347293	0.0853868	0.353854	0.271428	0.211406	0.258573	0.410187	0.436534	0.106091	-0.0991742	0.193612	0.255141	0.0162384	0.0488518	0.171005	-0.0469466	0.0764741	0.0278386	0.276631	0.417673	0.457777	0.149841	0.0202697	0.192405	0.199088
TCGA-VQ-AA64-01A	0.290361	0.382622	0.22802	0.44742	0.523582	0.502321	0.472936	0.45399	0.446587	0.422597	0.364107	0.41605	0.43583	0.444711	0.327794	0.365766	0.306417	0.261244	0.0268442	0.329685	0.260114	0.148471	0.212928	0.240334	0.375195	0.180468	0.387206	0.368307	0.341598	0.285554	0.396695	0.488066	0.200364	0.193635	0.257152	0.167307	0.071645	0.211983	0.207608	0.00592702	0.198384	0.163505	0.316366	0.431798	0.420674	0.270554	0.234763	0.248493	0.179475
TCGA-VQ-AA68-01A	0.401308	0.386712	0.315654	0.450876	0.464683	0.473273	0.35798	0.417703	0.445299	0.438027	0.372054	0.424962	0.452818	0.458393	0.373658	0.284676	0.37367	0.331296	0.154299	0.317486	0.314772	0.19146	0.237613	0.262261	0.41647	0.271692	0.365549	0.430881	0.449041	0.335635	0.3814	0.4736	0.249723	0.227244	0.266212	0.431316	0.176927	0.33813	0.209941	0.0560769	0.232454	0.200506	0.353676	0.441347	0.426578	0.297535	0.302022	0.270395	0.132331
TCGA-VQ-AA69-01A	0.430969	0.424676	0.401397	0.423993	0.393722	0.421632	0.269888	0.386508	0.474889	0.465606	0.40333	0.450581	0.477766	0.462795	0.425713	0.143711	0.425489	0.0122525	0.142021	0.341595	0.248667	0.125439	0.195414	0.209708	0.345713	0.298174	0.275952	0.428762	0.472877	0.343846	0.362557	0.440545	0.186942	-0.289465	0.366158	0.270311	0.115701	0.312118	0.249161	0.068049	0.208719	0.203287	0.325245	0.457479	0.480634	0.27471	0.318378	0.282836	0.133904
TCGA-VQ-AA6A-01A	0.222546	0.374979	0.169706	0.467778	0.443342	0.44833	0.309523	0.388097	0.443455	0.426086	0.36845	0.408151	0.43737	0.449797	0.296513	0.295839	0.196387	0.0729892	0.0991619	0.305707	0.273641	0.119088	0.170001	0.124424	0.313037	0.131478	0.329708	0.32691	0.301766	0.253993	0.386824	0.446011	0.127926	-0.108762	0.184665	0.344102	-0.0418907	0.165522	0.178134	-0.0191108	0.134537	0.0919022	0.284298	0.433312	0.432632	0.212026	0.116747	0.219509	0.124661
TCGA-VQ-AA6D-01A	0.233027	0.393875	0.215951	0.468976	0.434383	0.450466	0.34156	0.357227	0.457318	0.420879	0.386401	0.431501	0.457428	0.453241	0.334061	0.250614	0.260411	0.00587392	0.0472055	0.299077	0.286527	0.0760738	0.146792	0.160202	0.344931	0.13718	0.414362	0.298795	0.347883	0.291145	0.349377	0.470471	0.0975972	-0.29097	0.161588	0.14327	0.119361	0.124388	0.192421	-0.0274556	0.141836	0.113328	0.317732	0.431682	0.445359	0.262343	0.180011	0.234538	0.0228114
TCGA-VQ-AA6F-01A	0.391304	0.377459	0.30788	0.468791	0.456571	0.479009	0.326092	0.426127	0.442353	0.433587	0.364761	0.423712	0.448995	0.449523	0.376759	0.320733	0.352943	0.37915	0.11835	0.306147	0.30829	0.226637	0.267862	0.30008	0.405978	0.28581	0.445606	0.451608	0.455551	0.350586	0.423661	0.452629	0.284641	0.369921	0.310191	0.457316	0.0142236	0.343033	0.197297	0.055748	0.270681	0.275879	0.384511	0.448693	0.437292	0.339697	0.311389	0.295908	0.289901
TCGA-VQ-AA6G-01A	0.237272	0.370512	0.213053	0.454324	0.457156	0.477824	0.360748	0.41422	0.440407	0.415316	0.354026	0.414493	0.434436	0.439961	0.344199	0.287996	0.207818	0.0901184	0.110263	0.307917	0.296325	0.142234	0.139017	0.140236	0.410175	0.158143	0.401915	0.326603	0.326488	0.363349	0.408264	0.475562	0.149857	-0.148021	0.217234	0.351327	0.23896	0.167116	0.214722	0.031775	0.154909	0.142562	0.338124	0.453783	0.451144	0.239054	0.22159	0.285356	0.170408
TCGA-VQ-AA6J-01A	0.425752	0.387215	0.370106	0.45731	0.465325	0.493098	0.412971	0.430509	0.452632	0.439296	0.385564	0.420424	0.465399	0.458088	0.413011	0.310443	0.388002	0.37969	0.147798	0.397205	0.323525	0.235287	0.23884	0.344639	0.436545	0.323774	0.37582	0.469668	0.5044	0.377909	0.37299	0.456911	0.324586	0.34089	0.331229	0.175152	0.104631	0.382231	0.199907	0.080338	0.285526	0.287846	0.405452	0.46512	0.456013	0.342625	0.278676	0.318181	0.316685
TCGA-VQ-AA6K-01A	0.379952	0.379111	0.295072	0.46859	0.475326	0.492567	0.402374	0.441344	0.447073	0.430003	0.371552	0.42735	0.444196	0.454532	0.369142	0.353439	0.395738	0.1721	0.118823	0.339479	0.318991	0.224302	0.250584	0.241383	0.368598	0.246495	0.411528	0.434986	0.419055	0.328802	0.403156	0.471451	0.226868	0.0703012	0.354296	0.44489	0.119993	0.325728	0.193032	0.000842819	0.232806	0.191062	0.366952	0.434578	0.419975	0.287329	0.251196	0.284251	0.223478
TCGA-ZA-A8F6-01A	0.274632	0.350536	0.272056	0.427344	0.488027	0.513058	0.436062	0.479736	0.419614	0.398521	0.327687	0.39985	0.412834	0.430838	0.325373	0.443181	0.260326	0.101154	0.0698707	0.466562	0.317886	0.240787	0.20695	0.237747	0.416594	0.2495	0.351025	0.362997	0.304323	0.355144	0.441446	0.420399	0.226143	-0.121014	0.240257	0.468817	0.135119	0.23426	0.21118	0.0540175	0.202538	0.16017	0.333443	0.43825	0.402461	0.247634	0.180872	0.281703	0.187885
TCGA-ZQ-A9CR-01A	0.437375	0.363431	0.342621	0.460015	0.514993	0.524732	0.503351	0.497801	0.445319	0.424983	0.368848	0.408654	0.446132	0.439496	0.417051	0.355502	0.429149	0.128899	0.0673163	0.369988	0.328304	0.18147	0.285286	0.271657	0.430517	0.256805	0.387893	0.456792	0.483348	0.378085	0.431181	0.471675	0.226157	-0.0129396	0.407005	0.379693	0.285599	0.358148	0.22263	0.0250611	0.244666	0.178618	0.407434	0.452608	0.457991	0.306638	0.206854	0.299669	0.163889
[truncated: 49 more columns]

## Sheet: Table S5
Supplementary Table 5. Go enrichment analysis in TCGA-STAD cohort.
	ONTOLOGY	ID	Description	GeneRatio	BgRatio	pvalue	p.adjust	qvalue	geneID	Count
GO:0002253	BP	GO:0002253	activation of immune response	239/5405	397/18903	4.6793e-40	2.18685e-36	1.37946e-36	FCN3/CFH/PTPRC/PRKCE/PLSCR1/CFI/C7/MEF2C/BTNL9/EZR/BMX/PTK2/ABL1/CD81/CD59/SERPING1/THY1/PLEKHA1/A2M/CD276/BCAR1/YES1/PLCG1/NECTIN2/IFI16/HMGB1/SLC39A10/PRKCH/PLD2/TLR4/PIK3CA/CD46/APPL1/HSP90AA1/CD3E/PRKD2/FYB1/CLU/ZNFX1/GBP1/HRAS/DGKZ/PRKDC/CD79A/TRIM5/FOXP1/RC3H2/LAPTM5/RFTN1/CD3D/SPPL3/EIF2B2/DUSP3/IGHA1/C1QBP/RGCC/BAG6/CD38/MAVS/PDE4B/LPXN/C1R/TRBC2/EIF2B1/C1RL/CACNB3/SPG21/LIME1/WNK1/IGLL5/…	239
GO:0002768	BP	GO:0002768	immune response-regulating cell surface receptor signaling pathway	214/5405	341/18903	6.78304e-40	2.18685e-36	1.37946e-36	FCN3/PTPRC/PRKCE/PLSCR1/MEF2C/BTNL9/EZR/BMX/PTK2/ABL1/CD81/THY1/PLEKHA1/CD276/BCAR1/YES1/PLCG1/CD40/NECTIN2/SLC39A10/PRKCH/SOS1/PLD2/PIK3CA/APPL1/CD3E/PRKD2/FYB1/GBP1/HRAS/DGKZ/CD79A/FOXP1/RC3H2/LAPTM5/RFTN1/CD3D/SPPL3/EIF2B2/DUSP3/IGHA1/BAG6/CD38/PDE4B/LPXN/TRBC2/EIF2B1/CACNB3/SPG21/LIME1/WNK1/IGLL5/TYROBP/LCK/SKAP1/NR4A3/PTPN22/STK11/IGKC/FCER1G/CD247/RAB29/CD3G/DUSP22/FCGR2B/IGHA2/CD8A/BAX/COL…	214
GO:0002429	BP	GO:0002429	immune response-activating cell surface receptor signaling pathway	200/5405	312/18903	2.56361e-39	4.13254e-36	2.60679e-36	FCN3/PTPRC/PRKCE/PLSCR1/MEF2C/BTNL9/EZR/BMX/PTK2/ABL1/CD81/THY1/PLEKHA1/CD276/BCAR1/YES1/PLCG1/NECTIN2/SLC39A10/PRKCH/PLD2/PIK3CA/APPL1/CD3E/PRKD2/FYB1/GBP1/HRAS/DGKZ/CD79A/FOXP1/RC3H2/LAPTM5/RFTN1/CD3D/SPPL3/EIF2B2/DUSP3/IGHA1/BAG6/CD38/PDE4B/LPXN/TRBC2/EIF2B1/CACNB3/SPG21/LIME1/WNK1/IGLL5/TYROBP/LCK/SKAP1/NR4A3/PTPN22/STK11/IGKC/FCER1G/CD247/RAB29/CD3G/DUSP22/FCGR2B/IGHA2/CD8A/BAX/COLEC11/EIF2B…	200
GO:0002757	BP	GO:0002757	immune response-activating signal transduction	200/5405	312/18903	2.56361e-39	4.13254e-36	2.60679e-36	FCN3/PTPRC/PRKCE/PLSCR1/MEF2C/BTNL9/EZR/BMX/PTK2/ABL1/CD81/THY1/PLEKHA1/CD276/BCAR1/YES1/PLCG1/NECTIN2/SLC39A10/PRKCH/PLD2/PIK3CA/APPL1/CD3E/PRKD2/FYB1/GBP1/HRAS/DGKZ/CD79A/FOXP1/RC3H2/LAPTM5/RFTN1/CD3D/SPPL3/EIF2B2/DUSP3/IGHA1/BAG6/CD38/PDE4B/LPXN/TRBC2/EIF2B1/CACNB3/SPG21/LIME1/WNK1/IGLL5/TYROBP/LCK/SKAP1/NR4A3/PTPN22/STK11/IGKC/FCER1G/CD247/RAB29/CD3G/DUSP22/FCGR2B/IGHA2/CD8A/BAX/COLEC11/EIF2B…	200
GO:0045785	BP	GO:0045785	positive regulation of cell adhesion	274/5405	484/18903	6.50193e-39	8.38489e-36	5.28915e-36	PLPP3/S100A10/SELP/SELE/ABL2/LAMC1/PTPRC/SOX13/HLX/ITPKB/NID1/PRKCE/MAP4K4/LIMS2/ITGAV/IGFBP2/EPHA4/FBLN2/TGFBR2/LAMB2/RHOA/DAG1/HYAL1/MAGI1/HES1/KDR/MMRN1/LEF1/MYO10/DAB2/ITGA2/IL6ST/SOX4/FLOT1/UTRN/AFDN/RAC1/CD36/LAMB1/CAV1/PODXL/EFNB1/DMTN/SFRP1/TEK/ABL1/CD81/CD44/ARL2/ZBTB16/THY1/ST3GAL4/ETS1/RSU1/NRP1/CXCL12/ZMIZ1/DOCK1/ITGA5/KITLG/EFNB2/ARHGEF7/FERMT2/TJP1/CD276/EMP2/CORO1A/CX3CL1/ADGRG1/ZF…	274
GO:0050867	BP	GO:0050867	positive regulation of cell activation	265/5405	467/18903	6.65571e-38	7.15267e-35	4.51187e-35	SELP/ABL2/PTPRC/SOX13/HLX/ITPKB/TACR1/IGFBP2/TGFBR2/RHOA/GATA2/HES1/LEF1/IL6ST/MEF2C/SOX4/CAV1/EFNB1/IL33/STXBP1/ABL1/CD81/ZBTB16/THY1/ZMIZ1/KITLG/EFNB2/GAS6/MMP14/THBS1/CD276/CORO1A/CCL2/YES1/CD40/CD320/NECTIN2/LBP/HMGB1/LGALS9/SLC39A10/RHOH/IL15RA/VAMP8/PNP/STAT6/TLR4/PIK3CA/FLNA/CD46/PPP3CA/CD3E/ITGB2/AKT1/LAMP1/PDGFRB/PRKDC/FLOT2/LGALS1/CD27/NCK1/STAT5B/SOCS5/IL4R/BAD/GPR183/IL2RG/PTPN11/CCL5…	265
GO:0050851	BP	GO:0050851	antigen receptor-mediated signaling pathway	170/5405	252/18903	7.76794e-38	7.15539e-35	4.51358e-35	PTPRC/MEF2C/BTNL9/EZR/BMX/ABL1/CD81/THY1/PLEKHA1/CD276/BCAR1/PLCG1/NECTIN2/SLC39A10/PRKCH/PIK3CA/CD3E/PRKD2/FYB1/GBP1/HRAS/DGKZ/CD79A/FOXP1/RC3H2/LAPTM5/RFTN1/CD3D/SPPL3/EIF2B2/DUSP3/IGHA1/CD38/PDE4B/LPXN/TRBC2/EIF2B1/CACNB3/SPG21/LIME1/WNK1/IGLL5/LCK/SKAP1/PTPN22/STK11/IGKC/CD247/RAB29/CD3G/DUSP22/FCGR2B/IGHA2/CD8A/BAX/EIF2B3/RBCK1/NCKAP1L/TRBC1/KHDRBS1/PTPN6/ZAP70/CD79B/BCL10/RELA/STOML2/BLNK/S…	170
GO:0002696	BP	GO:0002696	positive regulation of leukocyte activation	257/5405	450/18903	1.96697e-37	1.58538e-34	1.00005e-34	ABL2/PTPRC/SOX13/HLX/ITPKB/TACR1/IGFBP2/TGFBR2/RHOA/GATA2/HES1/LEF1/IL6ST/MEF2C/SOX4/CAV1/EFNB1/IL33/STXBP1/ABL1/CD81/ZBTB16/THY1/ZMIZ1/KITLG/EFNB2/GAS6/MMP14/THBS1/CD276/CORO1A/CCL2/YES1/CD40/CD320/NECTIN2/LBP/HMGB1/LGALS9/SLC39A10/RHOH/IL15RA/VAMP8/PNP/STAT6/TLR4/PIK3CA/CD46/PPP3CA/CD3E/ITGB2/AKT1/LAMP1/PRKDC/FLOT2/LGALS1/CD27/NCK1/STAT5B/SOCS5/IL4R/BAD/GPR183/IL2RG/PTPN11/CCL5/IGHA1/HLA-E/CD38…	257
GO:0051251	BP	GO:0051251	positive regulation of lymphocyte activation	233/5405	400/18903	7.28365e-36	5.21833e-33	3.2917e-33	ABL2/PTPRC/SOX13/HLX/ITPKB/TACR1/IGFBP2/TGFBR2/RHOA/HES1/LEF1/IL6ST/MEF2C/SOX4/CAV1/EFNB1/ABL1/CD81/ZBTB16/THY1/ZMIZ1/KITLG/EFNB2/GAS6/MMP14/CD276/CORO1A/CCL2/YES1/CD40/CD320/HMGB1/LGALS9/SLC39A10/RHOH/IL15RA/PNP/STAT6/TLR4/PIK3CA/CD46/PPP3CA/CD3E/AKT1/LAMP1/PRKDC/FLOT2/LGALS1/CD27/NCK1/STAT5B/SOCS5/IL4R/BAD/GPR183/IL2RG/PTPN11/CCL5/IGHA1/HLA-E/CD38/SMARCA4/SELENOK/PHF10/SMARCE1/IL6/SMARCC2/TNIP2…	233
GO:0050900	BP	GO:0050900	leukocyte migration	231/5405	398/18903	3.16686e-35	2.04199e-32	1.28808e-32	S1PR1/SELP/SELE/ABL2/CD34/TACR1/ITGA6/HRH1/ITGA9/RHOA/CD200/APOD/VEGFC/ITGA2/EDN1/RAC1/HOXA7/SERPINE1/WASL/CD99/VEGFD/MSN/MTUS1/PTK2/PLEC/IL33/ABL1/CD81/SWAP70/PDGFD/THY1/ST3GAL4/JAM3/ITGB1/CXCL12/NKX2-3/CD9/ANO6/KITLG/FLT1/GAS6/MMP14/PGF/THBS1/EMP2/MAPK3/CORO1A/MMP2/CX3CL1/CRK/SPNS2/CCL2/MMP28/CCL14/CCL23/PECAM1/YES1/PLCB1/MADCAM1/PIP5K1C/PLVAP/BCR/MYH9/RAC2/PDGFB/JAM2/APP/LBP/HMGB1/LGALS9/NEDD9…	231
GO:1903131	BP	GO:1903131	mononuclear cell differentiation	256/5405	473/18903	4.50326e-32	2.63973e-29	1.66513e-29	PIK3R3/LEPR/PBX1/PTPRC/SOX13/HLX/ITPKB/TGFBR2/CTNNB1/RHOA/LEF1/SOX4/DLL1/HOXA7/PIR/ITM2A/SFRP1/MYC/CTSL/LRRC8A/ABL1/ZBTB16/ZEB1/ITGB1/ZMIZ1/HHEX/NKX2-3/LTBR/GAS6/MMP14/JAG2/DLL4/FES/KAT2A/ZBTB46/LYL1/MYH9/IFI16/HMGB1/LGALS9/RHOH/TRAF3IP2/PPARG/IL15RA/MFNG/SOS1/PNP/STAT6/CD46/CTNNBIP1/CD3E/SRF/PRKDC/CD79A/FOXP1/TP53/RC3H2/LGALS1/CD27/STAT5B/PHF14/CD3D/SOCS5/IL4R/BAD/GPR183/IL2RG/FOS/CHD7/NFATC1/SM…	256
GO:0007159	BP	GO:0007159	leukocyte cell-cell adhesion	229/5405	414/18903	1.24069e-30	6.66666e-28	4.2053e-28	SELP/SELE/ABL2/PTPRC/SOX13/HLX/ITPKB/IGFBP2/TGFBR2/RHOA/HES1/LEF1/IL6ST/SOX4/NT5E/EZR/CAV1/MSN/EFNB1/KLF4/ASS1/ABL1/CD81/CD44/LRRC32/ZBTB16/THY1/ST3GAL4/ETS1/ITGB1/CXCL12/ZMIZ1/ITGA5/KITLG/EFNB2/CD276/CORO1A/CCL2/PECAM1/YES1/MADCAM1/RAC2/JAM2/HMGB1/LGALS9/EXT1/RHOH/ICAM1/PNP/PIK3CA/CD46/F11R/PPP3CA/CD3E/ITGB2/AKT1/FLOT2/RC3H2/LAPTM5/LGALS1/CD27/TWSG1/NCK1/STAT5B/SOCS5/IL4R/BAD/IL2RG/PTPN11/CCL5/D…	229
GO:0030098	BP	GO:0030098	lymphocyte differentiation	230/5405	419/18903	4.17447e-30	2.07054e-27	1.30608e-27	PIK3R3/LEPR/PBX1/PTPRC/SOX13/HLX/ITPKB/TGFBR2/CTNNB1/RHOA/LEF1/SOX4/DLL1/ITM2A/SFRP1/CTSL/LRRC8A/ABL1/ZBTB16/ZEB1/ITGB1/ZMIZ1/HHEX/NKX2-3/GAS6/MMP14/JAG2/DLL4/KAT2A/LYL1/HMGB1/LGALS9/RHOH/TRAF3IP2/IL15RA/MFNG/SOS1/PNP/STAT6/CD46/CD3E/SRF/PRKDC/CD79A/FOXP1/TP53/RC3H2/LGALS1/CD27/STAT5B/PHF14/CD3D/SOCS5/IL4R/BAD/GPR183/IL2RG/CHD7/SMARCA4/PHF10/KDELR1/ADAM17/SMARCE1/CD2/IL6/LMBR1L/METTL3/ZBTB7A/SMAR…	230
GO:0006909	BP	GO:0006909	phagocytosis	185/5405	314/18903	1.46653e-29	6.75443e-27	4.26066e-27	FCN3/LEPR/PEAR1/PTPRC/PRKCE/DYSF/ITGAV/GULP1/GATA2/PLSCR1/ITGA2/SNX3/RAC1/ELMO1/CD36/SRPX/PTK2/GSN/ABL1/P2RY6/ITGB1/DOCK1/ANO6/GAS6/THBS1/CORO1A/CYBA/CCL2/PECAM1/YES1/CD93/TGM2/PIP5K1C/LDLR/BCR/MYH9/RAC2/LBP/HMGB1/RHOH/SCARB1/IL15RA/RHOBTB1/MFGE8/PLD2/SPHK1/TLR4/PIK3CA/MET/APPL1/ITGB2/IL2RG/IGHA1/BECN1/RAB14/CD302/CALR/TRBC2/ICAM3/NCF4/C1orf43/IGLL5/TYROBP/BIN2/RAB31/IL15/ANXA1/CLCN3/IGKC/FCER1G/…	185
GO:0002443	BP	GO:0002443	leukocyte mediated immunity	246/5405	463/18903	3.12779e-29	1.34453e-26	8.48124e-27	S100A13/PTPRC/GATA2/CFI/C7/STXBP1/PTGDS/CD81/SWAP70/SERPING1/FES/EMP2/CORO1A/CRK/ACE/JAG1/CD40/PVR/NECTIN2/BCR/RAC2/HMGB1/LGALS9/PRDX1/SNAP23/DNASE1L3/TUBB/TRAF3IP2/VAMP8/ICAM1/TRPM4/STAT6/TLR4/CD46/TAP2/ITGB2/MICA/LAMP1/CLU/IL1R1/AHR/DDX1/WAS/CD27/RFTN1/STAT5B/IL4R/PLEKHM2/IGHA1/HLA-E/C1QBP/MAVS/ADAM17/UNG/CD2/IL6/NKG7/STXBP2/SLAMF7/C1R/TRBC2/C1RL/BST2/CTSH/IGLL5/TYROBP/CBL/CCL3/NR4A3/HLA-DRA/HP…	246
GO:0001819	BP	GO:0001819	positive regulation of cytokine production	255/5405	486/18903	3.77595e-29	1.52171e-26	9.59886e-27	S100A13/PTPRC/CD34/ROCK2/SPTBN1/HYAL2/CD200/ZBTB20/HEG1/IL6ST/F2R/FLT4/FLOT1/NOD1/HSPB1/CD36/SERPINE1/IL33/ABL1/CD81/THBS1/CD276/GPRC5B/CX3CL1/CYBA/KAT2A/PLCB1/CD40/SULF2/CARD8/MAPK11/APP/LBP/IFI16/AKAP12/HMGB1/LGALS9/CYP1B1/AGPAT1/C1QTNF3/HIF1A/PNP/HK1/SPHK1/TRIM56/TLR4/CD46/APPL1/ZNF580/HSP90AA1/CD3E/PRKD2/LAMTOR5/FURIN/IL17RC/SMAD3/CLU/FRMD8/IL1R1/GSDMD/SLC7A5/HRAS/IFNGR1/FOXP1/DDX1/DHX33/LAPT…	255
GO:0050863	BP	GO:0050863	regulation of T cell activation	209/5405	376/18903	1.9518e-28	7.40307e-26	4.66982e-26	ABL2/PTPRC/SOX13/HLX/ITPKB/IGFBP2/TGFBR2/CTNNB1/RHOA/HES1/LEF1/IL6ST/SOX4/CAV1/EFNB1/ABL1/CD81/LRRC32/ZBTB16/THY1/ZEB1/ZMIZ1/KITLG/EFNB2/CD276/CORO1A/CCL2/KAT2A/YES1/RAC2/HMGB1/LGALS9/RHOH/SOS1/PNP/PIK3CA/CD46/PPP3CA/CD3E/AKT1/FLOT2/RC3H2/LAPTM5/LGALS1/CD27/TWSG1/NCK1/STAT5B/SOCS5/IL4R/BAD/IL2RG/PTPN11/CCL5/DUSP3/HLA-E/SMARCA4/SELENOK/PHF10/SMARCE1/PRKAR1A/CD2/IL6/METTL3/SMARCC2/RUNX3/EGR3/SMARCA…	209
GO:0022407	BP	GO:0022407	regulation of cell-cell adhesion	254/5405	490/18903	5.49542e-28	1.96858e-25	1.24177e-25	PLPP3/SELP/SELE/ABL2/PTPRC/SOX13/HLX/ITPKB/IGFBP2/TGFBR2/RHOA/MAGI1/HES1/MMRN1/LEF1/MYO10/IL6ST/SOX4/FLOT1/NOTCH4/AFDN/CAV1/PODXL/EFNB1/DMTN/PTK2/KLF4/ASS1/ABL1/NOTCH1/CD81/SWAP70/CD44/LRRC32/RDX/ZBTB16/THY1/ST3GAL4/ETS1/CXCL12/ZMIZ1/CD9/KITLG/SH2B3/EFNB2/TJP1/CD276/CORO1A/CX3CL1/ADAMTS18/PIEZO1/CCL2/YES1/JAG1/PPM1F/HMGB1/LGALS9/RHOH/PNP/PIK3CA/CD46/F11R/PPP3CA/MINK1/CD3E/ITGB2/AKT1/FLOT2/RC3H2/L…	254
GO:0022409	BP	GO:0022409	positive regulation of cell-cell adhesion	185/5405	322/18903	1.12808e-27	3.82833e-25	2.41489e-25	PLPP3/SELP/SELE/ABL2/PTPRC/SOX13/HLX/ITPKB/IGFBP2/TGFBR2/RHOA/MAGI1/HES1/MMRN1/LEF1/MYO10/IL6ST/SOX4/FLOT1/AFDN/CAV1/PODXL/EFNB1/DMTN/ABL1/CD81/CD44/ZBTB16/THY1/ST3GAL4/ETS1/ZMIZ1/KITLG/EFNB2/TJP1/CD276/CORO1A/CX3CL1/PIEZO1/CCL2/YES1/HMGB1/LGALS9/RHOH/PNP/PIK3CA/CD46/F11R/PPP3CA/CD3E/ITGB2/AKT1/FLOT2/LGALS1/CD27/NCK1/STAT5B/SOCS5/IL4R/BAD/IL2RG/PTPN11/CCL5/HLA-E/SMARCA4/SELENOK/PHF10/SMARCE1/IL6/…	185
GO:0001667	BP	GO:0001667	ameboidal-type cell migration	254/5405	492/18903	1.22677e-27	3.95511e-25	2.49487e-25	PLEKHG5/EPHA2/WASF2/PHACTR4/MACF1/PIK3R3/PLPP3/SEMA6C/RAB13/EFNA1/AKT3/ROCK2/RHOB/PRKCE/RTN4/TACR1/ATOH8/SEMA4C/MAP4K4/FAP/BMPR2/NRP2/TNS1/IQSEC1/TGFBR2/RHOA/SEMA3F/HYAL1/HYAL2/SEMA3G/PTPRG/ADAMTS9/ROBO1/FSTL1/GATA2/PLXND1/AMOTL2/KDR/VEGFC/ITGA2/PLK2/MEF2C/SEMA6A/HBEGF/SPARC/FLT4/EDN1/GJA1/SASH1/RAC1/MEOX2/AQP1/BMPER/HSPB1/EPHB4/NOS3/EFNB1/ANGPT2/DMTN/LOXL2/STC1/ADGRA2/FGFR1/SOX17/ENPP2/PTK2/PTP4…	254
GO:1903039	BP	GO:1903039	positive regulation of leukocyte cell-cell adhesion	164/5405	275/18903	3.57734e-27	1.09841e-24	6.92875e-25	SELP/SELE/ABL2/PTPRC/SOX13/HLX/ITPKB/IGFBP2/TGFBR2/RHOA/HES1/LEF1/IL6ST/SOX4/CAV1/EFNB1/ABL1/CD81/CD44/ZBTB16/THY1/ST3GAL4/ETS1/ZMIZ1/KITLG/EFNB2/CD276/CORO1A/CCL2/YES1/HMGB1/LGALS9/RHOH/PNP/PIK3CA/CD46/PPP3CA/CD3E/ITGB2/AKT1/FLOT2/LGALS1/CD27/NCK1/STAT5B/SOCS5/IL4R/BAD/IL2RG/PTPN11/CCL5/HLA-E/SMARCA4/SELENOK/PHF10/SMARCE1/IL6/SMARCC2/RUNX3/EGR3/SMARCA2/SMARCD1/SMARCD2/ITGA4/ARID1B/LCK/VCAM1/IL15…	164
GO:0042113	BP	GO:0042113	B cell activation	194/5405	350/18903	2.84581e-26	8.34081e-24	5.26134e-24	PIK3R3/PTPRC/LEF1/MEF2C/DLL1/ITM2A/SFRP1/LRRC8A/ABL1/CD81/SWAP70/ITGB1/HHEX/NKX2-3/MMP14/CD40/CD320/LYL1/SLC39A10/SAMSN1/TRAF3IP2/PKN1/MFNG/STAT6/TLR4/TNFAIP3/MZB1/PRKDC/CD79A/AHR/TP53/LAPTM5/LGALS1/CD27/STAT5B/PHF14/BAD/GPR183/IL2RG/TXLNA/IGHA1/CD38/ADAM17/UNG/IL6/SKAP2/ZBTB7A/POU2AF1/ZFP36L1/TNIP2/HDAC5/TRBC2/IRF2BP2/ITGA4/BST2/IGLL5/PTEN/TYROBP/VCAM1/TPD52/TBC1D10C/SLC39A7/IGKC/YY1/CEBPG/XBP1/…	194
GO:0030217	BP	GO:0030217	T cell differentiation	171/5405	296/18903	4.76851e-26	1.33684e-23	8.43274e-24	PIK3R3/LEPR/PTPRC/SOX13/HLX/ITPKB/TGFBR2/CTNNB1/RHOA/LEF1/SOX4/CTSL/ABL1/ZBTB16/ZEB1/ZMIZ1/NKX2-3/JAG2/DLL4/KAT2A/HMGB1/LGALS9/RHOH/TRAF3IP2/SOS1/PNP/STAT6/CD46/CD3E/SRF/PRKDC/FOXP1/TP53/RC3H2/CD27/STAT5B/CD3D/SOCS5/IL4R/BAD/GPR183/IL2RG/CHD7/SMARCA4/PHF10/KDELR1/ADAM17/SMARCE1/CD2/IL6/LMBR1L/METTL3/SMARCC2/STAT3/ZFP36L1/RUNX3/EGR3/ARMC5/PREX1/SMARCA2/SMARCD1/CLPTM1/SMARCD2/PRDX2/ARID1B/NRARP/LCK…	171
GO:0031589	BP	GO:0031589	cell-substrate adhesion	201/5405	369/18903	7.02264e-26	1.88675e-23	1.19015e-23	VAMP3/MACF1/ITGA10/S100A10/ADAM15/EFNA1/LAMC1/CD34/NID1/ROCK2/PRKCE/MAP4K4/LIMS2/ITGA6/HOXD3/ITGAV/SNED1/FBLN2/ITGA9/CTNNB1/LAMB2/RHOA/DAG1/FAM107A/ADAMTS9/PHLDB2/APOD/LIMCH1/KDR/DAB2/ITGA2/SPRY4/TNXB/PTPRK/UTRN/RAC1/HOXA7/CD36/SERPINE1/LAMB1/ANGPT2/DLC1/DMTN/SORBS3/SFRP1/PTK2/TEK/ABL1/NOTCH1/PARVA/CD44/ARL2/CTTN/FZD4/THY1/JAM3/RSU1/ITGB1/NRP1/COL13A1/PLAU/VCL/DOCK1/VWF/ACVRL1/ITGA5/CD63/PXN/THSD…	201
GO:0050870	BP	GO:0050870	positive regulation of T cell activation	151/5405	251/18903	1.11644e-25	2.87952e-23	1.81639e-23	ABL2/PTPRC/SOX13/HLX/ITPKB/IGFBP2/TGFBR2/RHOA/HES1/LEF1/IL6ST/SOX4/CAV1/EFNB1/ABL1/CD81/ZBTB16/THY1/ZMIZ1/KITLG/EFNB2/CD276/CORO1A/CCL2/YES1/HMGB1/LGALS9/RHOH/PNP/PIK3CA/CD46/PPP3CA/CD3E/AKT1/FLOT2/LGALS1/CD27/NCK1/STAT5B/SOCS5/IL4R/BAD/IL2RG/PTPN11/CCL5/HLA-E/SMARCA4/SELENOK/PHF10/SMARCE1/IL6/SMARCC2/RUNX3/EGR3/SMARCA2/SMARCD1/SMARCD2/ARID1B/LCK/VCAM1/IL15/ANXA1/HLA-DRA/PTPN22/BRD7/XBP1/ARID1A/S…	151
GO:0007265	BP	GO:0007265	Ras protein signal transduction	194/5405	353/18903	1.18053e-25	2.92773e-23	1.8468e-23	GNB1/PLEKHG5/WASF2/PHACTR4/ARHGAP29/ABL2/RGL1/ITPKB/ROCK2/RHOB/RASGRP3/MAP4K4/RALB/RAPGEF4/NCKAP1/IQSEC1/RHOA/ROBO1/HEG1/SPRY1/PLK2/ARHGEF28/F2R/RASGRF2/ARAP3/SPRY4/FLOT1/RGL2/RAC1/RAPGEF5/ELMO1/RASA4/STARD8/DLC1/PPP2CB/CTNNAL1/DAB2IP/ABL1/NOTCH1/CDC42EP2/ARRB1/RDX/ARHGEF12/ITGB1/NRP1/RAPGEF3/KITLG/KCTD10/STARD13/LPAR6/MCF2L/RHOJ/CYFIP1/HACD3/ADGRG1/RIPOR1/CDH13/CRK/TAX1BP3/GRAP/TNFAIP1/GIT1/CDC4…	194
GO:1903037	BP	GO:1903037	regulation of leukocyte cell-cell adhesion	203/5405	377/18903	2.81688e-25	6.72713e-23	4.24345e-23	SELP/SELE/ABL2/PTPRC/SOX13/HLX/ITPKB/IGFBP2/TGFBR2/RHOA/HES1/LEF1/IL6ST/SOX4/CAV1/EFNB1/KLF4/ASS1/ABL1/CD81/CD44/LRRC32/ZBTB16/THY1/ST3GAL4/ETS1/CXCL12/ZMIZ1/KITLG/EFNB2/CD276/CORO1A/CCL2/YES1/HMGB1/LGALS9/RHOH/PNP/PIK3CA/CD46/PPP3CA/CD3E/ITGB2/AKT1/FLOT2/RC3H2/LAPTM5/LGALS1/CD27/TWSG1/NCK1/STAT5B/SOCS5/IL4R/BAD/IL2RG/PTPN11/CCL5/DUSP3/HLA-E/SMARCA4/SELENOK/PHF10/SMARCE1/PRKAR1A/IL6/SMARCC2/RUNX3…	203
GO:0002460	BP	GO:0002460	adaptive immune response based on somatic recombination of immune receptors built from immunoglobulin superfamily domains	202/5405	375/18903	3.47404e-25	8.00023e-23	5.04651e-23	PTPRC/HLX/LEF1/CFI/C7/MEF2C/IL33/NOTCH1/CD81/SWAP70/SERPING1/IL18BP/EMP2/JAG1/CD40/PVR/NECTIN2/HMGB1/TRAF3IP2/PKN1/ICAM1/TRPM4/STAT6/TLR4/CD46/TAP2/MICA/TNFAIP3/CLU/IL1R1/HRAS/AHR/RC3H2/WAS/CD27/RFTN1/SOCS5/IL4R/IGHA1/HLA-E/C1QBP/ADAM17/UNG/IL6/STAT3/C1R/TRBC2/C1RL/CTSH/IGLL5/IRF4/ANXA1/MTOR/HLA-DRA/HPRT1/IGKC/FCER1G/EXOSC6/DUSP22/FCGR2B/IGHA2/SASH3/IL7R/LY9/CD8A/MYO1G/NCKAP1L/TRBC1/PTPN6/NDFIP1/…	202
GO:0032103	BP	GO:0032103	positive regulation of response to external stimulus	235/5405	464/18903	3.66857e-24	8.15687e-22	5.14532e-22	FCN3/S1PR1/BMPR2/HYAL2/PLSCR1/KDR/MGST2/VEGFC/OSMR/ITGA2/IL6ST/EDN1/SASH1/RAC1/NOD1/HSPB1/SERPINE1/VEGFD/FGFR1/FABP4/PTK2/IL33/CD81/SWAP70/PDE2A/PDGFD/ETS1/NRP1/CXCL12/PLAU/MMRN2/TNFRSF1A/ANO6/GAS6/PGF/THBS1/C2CD4B/GPRC5B/MAPK3/CX3CL1/CDH13/CYBA/SCARF1/GRN/ACE/THBD/LDLR/PVR/NECTIN2/GPR4/PPM1F/RAC2/PDGFB/APP/LBP/IFI16/HMGB1/LGALS9/NEDD9/VAMP8/CXCR4/TRIM56/TLR4/FLNA/MET/ZNF580/HSP90AA1/PRKD2/IGF1R/…	235
GO:0002449	BP	GO:0002449	lymphocyte mediated immunity	195/5405	367/18903	2.0912e-23	4.38431e-21	2.7656e-21	PTPRC/CFI/C7/CD81/SWAP70/SERPING1/EMP2/CORO1A/CRK/JAG1/CD40/PVR/NECTIN2/HMGB1/LGALS9/PRDX1/TUBB/TRAF3IP2/ICAM1/TRPM4/STAT6/CD46/TAP2/MICA/LAMP1/CLU/IL1R1/AHR/WAS/CD27/RFTN1/STAT5B/IL4R/PLEKHM2/IGHA1/HLA-E/C1QBP/UNG/CD2/IL6/NKG7/SLAMF7/C1R/TRBC2/C1RL/CTSH/IGLL5/HLA-DRA/HPRT1/IGKC/CEBPG/FCER1G/EXOSC6/DUSP22/FCGR2B/IGHA2/SASH3/IL7R/CD8A/GZMB/KIF5B/MYO1G/CD96/NCKAP1L/TRBC1/PTPN6/NDFIP1/GZMM/BCL10/GNL…	195
GO:0050853	BP	GO:0050853	B cell receptor signaling pathway	92/5405	130/18903	2.10784e-23	4.38431e-21	2.7656e-21	PTPRC/MEF2C/BMX/ABL1/CD81/PLEKHA1/BCAR1/SLC39A10/PRKCH/CD79A/FOXP1/RFTN1/IGHA1/CD38/LPXN/TRBC2/LIME1/IGLL5/LCK/PTPN22/IGKC/FCGR2B/IGHA2/BAX/NCKAP1L/TRBC1/PTPN6/CD79B/BLNK/SH2B2/SYK/IGLC2/ITK/IGLC3/LAT2/CD300A/PRKCB/IGHG1/BTK/CTLA4/CD19/STAP1/BCL2/PIK3CD/IGHM/MNDA/KLHL6/IGHV3-30/BLK/IGHV3-7/IGHV4-59/IGHV3-23/IGHV3-11/IGHV4-61/IGHV4-39/IGHG3/IGHV4-4/IGHG2/IGHV3-48/MS4A1/IGHV4-34/IGHV3-33/IGHV3-74/T…	92
GO:0010631	BP	GO:0010631	epithelial cell migration	194/5405	366/18903	3.96339e-23	7.98623e-21	5.03768e-21	PLEKHG5/EPHA2/MACF1/PIK3R3/PLPP3/RAB13/EFNA1/AKT3/ROCK2/RHOB/PRKCE/RTN4/TACR1/ATOH8/MAP4K4/FAP/BMPR2/NRP2/IQSEC1/TGFBR2/RHOA/HYAL1/PTPRG/ADAMTS9/ROBO1/FSTL1/GATA2/PLXND1/KDR/VEGFC/ITGA2/PLK2/MEF2C/HBEGF/SPARC/FLT4/EDN1/SASH1/RAC1/MEOX2/BMPER/HSPB1/EPHB4/NOS3/ANGPT2/LOXL2/STC1/ADGRA2/FGFR1/ENPP2/PTK2/PTP4A3/TEK/KLF4/DAB2IP/PKN3/ABL1/NOTCH1/PIK3C2A/PRCP/ETS1/JCAD/ITGB1/NRP1/MMRN2/DOCK1/HDAC7/ACVRL1…	194
GO:0016032	BP	GO:0016032	viral process	215/5405	421/18903	8.70258e-23	1.70043e-20	1.07262e-20	EPHA2/FCN3/NFIA/ST6GALNAC3/NR5A2/NUCKS1/CHMP3/ITGAV/DAG1/HYAL2/PLSCR1/LEF1/ITGA2/SNX3/CAV2/CAV1/ZDHHC9/CTSL/GSN/STOM/NOTCH1/IFITM2/IFITM1/IFITM3/CD81/ST3GAL4/ITGB1/NRP1/CTBP2/ITGA5/EFNB2/GAS6/IFI27/NEDD4/HACD3/CCL2/INSR/LDLR/MVB12A/PVR/NECTIN2/ZDHHC8/ADARB1/IFI16/HMGB1/LGALS9/GALNT1/CHMP5/PRMT1/SCARB1/PPIA/VAMP8/PCSK5/CXCR4/ICAM1/HDAC1/ISG20/PCBP2/CD46/F11R/RAB1B/CHMP2A/BANF1/PAIP1/LAMTOR5/SCARB2…	215
GO:0090130	BP	GO:0090130	tissue migration	196/5405	374/18903	1.39265e-22	2.58991e-20	1.6337e-20	PLEKHG5/EPHA2/MACF1/PIK3R3/PLPP3/RAB13/EFNA1/AKT3/ROCK2/RHOB/PRKCE/RTN4/TACR1/ATOH8/MAP4K4/FAP/BMPR2/NRP2/IQSEC1/TGFBR2/RHOA/HYAL1/PTPRG/ADAMTS9/ROBO1/FSTL1/GATA2/PLXND1/KDR/VEGFC/ITGA2/PLK2/MEF2C/HBEGF/SPARC/FLT4/EDN1/SASH1/RAC1/MEOX2/BMPER/HSPB1/EPHB4/NOS3/ANGPT2/LOXL2/STC1/ADGRA2/FGFR1/ENPP2/PTK2/PTP4A3/TEK/KLF4/DAB2IP/PKN3/ABL1/NOTCH1/PIK3C2A/PRCP/ETS1/JCAD/ITGB1/NRP1/MMRN2/DOCK1/HDAC7/ACVRL1…	196
GO:0090132	BP	GO:0090132	epithelium migration	194/5405	369/18903	1.40581e-22	2.58991e-20	1.6337e-20	PLEKHG5/EPHA2/MACF1/PIK3R3/PLPP3/RAB13/EFNA1/AKT3/ROCK2/RHOB/PRKCE/RTN4/TACR1/ATOH8/MAP4K4/FAP/BMPR2/NRP2/IQSEC1/TGFBR2/RHOA/HYAL1/PTPRG/ADAMTS9/ROBO1/FSTL1/GATA2/PLXND1/KDR/VEGFC/ITGA2/PLK2/MEF2C/HBEGF/SPARC/FLT4/EDN1/SASH1/RAC1/MEOX2/BMPER/HSPB1/EPHB4/NOS3/ANGPT2/LOXL2/STC1/ADGRA2/FGFR1/ENPP2/PTK2/PTP4A3/TEK/KLF4/DAB2IP/PKN3/ABL1/NOTCH1/PIK3C2A/PRCP/ETS1/JCAD/ITGB1/NRP1/MMRN2/DOCK1/HDAC7/ACVRL1…	194
GO:0060326	BP	GO:0060326	cell chemotaxis	173/5405	319/18903	3.59953e-22	6.44715e-20	4.06683e-20	PLEKHG5/EPHA2/S1PR1/RAB13/ACKR3/HRH1/ITGA9/KDR/LEF1/VEGFC/HBEGF/EDN1/RAC1/HSPB1/SERPINE1/DOCK4/VEGFD/MTUS1/FGFR1/PTK2/PLEC/NOTCH1/SWAP70/PARVA/PDGFD/JAM3/NRP1/CXCL12/ANO6/FLT1/GAS6/PGF/THBS1/MAPK3/CORO1A/MMP2/CX3CL1/BCAR1/CRK/CCL2/MMP28/CCL14/CCL23/PIP5K1C/RAC2/PDGFB/LBP/HMGB1/LGALS9/NEDD9/EDNRB/PPIA/CXCR4/ITGA1/TRPM4/HSD3B7/MET/ZNF580/PRKD2/ADAM10/IL17RC/TPBG/ITGB2/PDGFRB/BSG/PPIB/CCL4/SLC12A2/G…	173
GO:0007160	BP	GO:0007160	cell-matrix adhesion	139/5405	238/18903	4.96553e-22	8.65344e-20	5.45855e-20	MACF1/ITGA10/S100A10/ADAM15/CD34/NID1/ROCK2/MAP4K4/ITGA6/HOXD3/ITGAV/SNED1/ITGA9/CTNNB1/RHOA/DAG1/FAM107A/ADAMTS9/PHLDB2/APOD/LIMCH1/KDR/ITGA2/TNXB/PTPRK/UTRN/RAC1/HOXA7/CD36/SERPINE1/DLC1/DMTN/SFRP1/PTK2/TEK/ABL1/CD44/CTTN/THY1/JAM3/ITGB1/NRP1/COL13A1/PLAU/VCL/ACVRL1/ITGA5/CD63/PXN/THSD1/ARHGEF7/MMP14/NID2/FERMT2/ACTN1/THBS1/PEAK1/EMP2/TAOK2/CX3CL1/CDH13/JUP/ITGB4/ACTG1/JAG1/RIN2/MADCAM1/DAPK3/B…	139
GO:0002685	BP	GO:0002685	regulation of leukocyte migration	134/5405	231/18903	6.40717e-21	1.0872e-18	6.85798e-19	SELP/SELE/ABL2/TACR1/RHOA/CD200/APOD/VEGFC/ITGA2/EDN1/RAC1/HOXA7/SERPINE1/WASL/CD99/VEGFD/MSN/MTUS1/PTK2/IL33/ABL1/CD81/SWAP70/PDGFD/THY1/ST3GAL4/JAM3/CXCL12/CD9/ANO6/KITLG/GAS6/MMP14/PGF/THBS1/MAPK3/CORO1A/CX3CL1/CRK/SPNS2/CCL2/MMP28/PLCB1/MADCAM1/PLVAP/BCR/RAC2/JAM2/APP/LBP/HMGB1/LGALS9/NEDD9/LYVE1/RHOH/LRCH1/ICAM1/CD99L2/ZNF580/ADAM10/AKT1/IL1R1/CCL4/CCL5/C1QBP/GPSM3/SELENOK/ADAM17/IL6/CALR/IT…	134
GO:0007015	BP	GO:0007015	actin filament organization	223/5405	454/18903	7.91291e-21	1.30827e-18	8.25249e-19	ASAP3/WASF2/MARCKSL1/S1PR1/RHOC/S100A10/HMCN1/ENAH/ROCK2/RHOB/PRKCE/SPTBN1/TACR1/TMSB10/NCKAP1/MYO1B/RHOA/FAM107A/PHLDB2/ADD1/LIMCH1/SORBS2/CTNNA1/DPYSL3/SYNPO/DBN1/MYO6/MARCKS/EZR/FSCN1/RAC1/ELMO1/ELN/HIP1/WASL/CALD1/SHROOM4/DIAPH2/PLS3/DLC1/DMTN/SORBS3/SFRP1/PLEC/GSN/SPTAN1/ABL1/AIF1L/SWAP70/CDC42EP2/CTTN/ARRB1/RDX/ESAM/FAM171A1/SVIL/NRP1/CXCL12/PDLIM1/RAPGEF3/RND1/LIMA1/PXN/FERMT2/ACTN1/CYFIP1…	223
GO:0002687	BP	GO:0002687	positive regulation of leukocyte migration	97/5405	148/18903	9.21207e-21	1.48499e-18	9.36722e-19	SELP/ABL2/TACR1/RHOA/VEGFC/ITGA2/EDN1/RAC1/SERPINE1/CD99/VEGFD/PTK2/ABL1/SWAP70/PDGFD/THY1/JAM3/CXCL12/ANO6/KITLG/GAS6/MMP14/PGF/THBS1/MAPK3/CORO1A/CX3CL1/MADCAM1/PLVAP/RAC2/JAM2/APP/LBP/HMGB1/LGALS9/NEDD9/LYVE1/ICAM1/CD99L2/ZNF580/ADAM10/IL1R1/CCL4/CCL5/C1QBP/GPSM3/SELENOK/ADAM17/IL6/CALR/ITGA4/WNK1/DNM1L/TNFRSF18/CCL3/SPI1/DOCK8/NCKAP1L/ADAM8/AIF1/CCL21/TNF/PTN/SPN/RARRES2/PTK2B/CCL20/PTAFR/CCR…	97
GO:0045862	BP	GO:0045862	positive regulation of proteolysis	191/5405	372/18903	1.01643e-20	1.59853e-18	1.00834e-18	PINK1/S100A10/EFNA1/RNF144A/ROCK2/SH3RF3/EPHA4/BOK/CLEC3B/RHOA/ROBO1/TNFSF10/SH3D19/DAB2/F2R/ECSCR/NOD1/HIP1/FIS1/CAV1/BEX3/SOX7/DLC1/ASPH/MYC/PTK2/IL33/GSN/DAB2IP/PICALM/MMP14/ANXA2/UACA/PML/GRN/CARD8/PPM1F/MYH9/MAPK12/APP/SFRP2/IFI16/HMGB1/LGALS9/SVBP/DISC1/CSNK1E/BCAP31/PRICKLE1/PPARG/ATXN3/HIP1R/ZYG11B/MTCH1/FURIN/AKT1/SMAD3/CLU/ELOB/NGFR/PDCD6/SNX33/GSK3A/HERPUD1/PSMD10/LAPTM5/NLRP1/PDCD5/HD…	191
GO:0010324	BP	GO:0010324	membrane invagination	94/5405	143/18903	2.68128e-20	4.1164e-18	2.5966e-18	FNBP1L/GULP1/RHOA/GATA2/ITGA2/FCHO2/SNX3/RAC1/ELMO1/CD36/GSN/DOCK1/ANO6/THBS1/MYH9/RAC2/RHOH/RHOBTB1/MFGE8/CHMP2A/ITGB2/SNX33/IGHA1/BECN1/TRBC2/IGLL5/HGS/BIN2/RAB31/CLCN3/IGKC/FCGR2B/IGHA2/NCKAP1L/TRBC1/CDC42/AIF1/ARF1/IGLC2/IGLC3/SH3BP1/CD300A/IGHG1/STAP1/FCGR1A/TREM2/MARCO/IGHM/MSR1/IGHV3-30/IGHV3-7/IGHV4-59/IGHV3-23/IGHV3-11/IGHV4-61/IGHV4-39/IGHG3/IGHV4-4/IGHG2/IGHV3-48/IGHV4-34/IGHV3-33/IGHV…	94
GO:0042060	BP	GO:0042060	wound healing	217/5405	442/18903	2.87607e-20	4.31277e-18	2.72047e-18	MACF1/PLPP3/RHOC/S100A10/PEAR1/SELP/CSRP1/CD34/PRKCE/DYSF/CHMP3/FAP/TFPI/TGFBR2/RHOA/DAG1/PROS1/PHLDB2/MYLK/GATA2/PLSCR1/KDR/MMRN1/ITGA2/IL6ST/F2R/HBEGF/EDN1/NOTCH4/PTK7/CD109/AQP1/HSPB1/CD36/SERPINE1/CAV1/NOS3/SYTL4/DMTN/FZD6/PTK2/PLEC/IL33/GNAQ/STXBP1/CD151/CD59/CD44/SERPING1/PRCP/MCAM/ST3GAL4/ITGB1/PLAU/VCL/MYOF/ENTPD1/VWF/CD9/ANO6/ACVRL1/ITGA5/ELK3/SH2B3/DGKH/GAS6/FERMT2/THBS1/ANXA2/CX3CL1/AD…	217
GO:0008360	BP	GO:0008360	regulation of cell shape	99/5405	154/18903	3.01198e-20	4.41391e-18	2.78428e-18	PALMD/RHOC/PLXNA2/RHOB/FGD5/RHOA/DAG1/PLXND1/KDR/MYO10/ARAP3/EZR/RAC1/MSN/DLC1/DMTN/PTK2/PARVA/CDC42EP2/RDX/FAM171A1/RND1/FMNL3/FGD6/FERMT2/RHOJ/CYFIP1/FES/TAOK2/CORO1A/CFDP1/CRK/MYH10/CCL2/CDC42EP4/MYL12A/MYL12B/PALM/DAPK3/CDC42EP5/MYH9/RAC2/CDC42EP1/PARVB/EPB41L3/RHOH/TPM1/RHOBTB1/EPS8/F11R/FBLIM1/ITGB2/PLXNB2/SYNE3/RHOU/GNA12/DNMBP/ARHGAP35/SLC9A3R1/CDC42EP3/PRAG1/PLEKHO1/ZMPSTE24/RHOF/FMNL2/A…	99
GO:0050852	BP	GO:0050852	T cell receptor signaling pathway	92/5405	139/18903	3.3213e-20	4.75905e-18	3.00199e-18	PTPRC/BTNL9/EZR/ABL1/CD81/THY1/CD276/BCAR1/PLCG1/NECTIN2/PIK3CA/CD3E/PRKD2/FYB1/GBP1/HRAS/DGKZ/RC3H2/LAPTM5/RFTN1/CD3D/SPPL3/EIF2B2/DUSP3/PDE4B/TRBC2/EIF2B1/CACNB3/LIME1/WNK1/LCK/SKAP1/PTPN22/STK11/CD247/RAB29/CD3G/DUSP22/CD8A/EIF2B3/RBCK1/TRBC1/KHDRBS1/PTPN6/ZAP70/BCL10/RELA/STOML2/PHPT1/THEMIS2/SLA2/ITK/CD300A/TRAT1/CD8B/SH2D1A/CD28/GATA3/CCR7/FYN/LILRB4/CTLA4/CBLB/LCP2/THEMIS/DENND1B/HLA-DPB1/…	92
GO:0019221	BP	GO:0019221	cytokine-mediated signaling pathway	237/5405	496/18903	4.24179e-20	5.94589e-18	3.75064e-18	LEPR/ACKR1/PTPRC/PXDN/ACKR3/ROBO1/LIFR/OSMR/IL6ST/FOXC1/EDN1/CAV1/IL3RA/IL13RA1/PPP2CB/IL33/NOTCH1/IFITM2/IFITM1/IFITM3/CD44/FZD4/CCDC3/CXCL12/TNFRSF1A/SH2B3/GAS6/IFI27/MAPK3/CX3CL1/CCL2/CCL14/CCL23/CSF3/TBKBP1/PLCB1/CDC37/PLVAP/ACTN4/CARD8/PDGFB/AGPAT1/IL11RA/EXT1/PRKACA/TRAF3IP2/HIF1A/NKIRAS2/PPARG/IL15RA/ILK/RRAGA/CXCR4/WBP1L/SOS1/SPHK1/STAT6/TRIM56/APPL1/SLC27A1/IL17RC/AKT1/TNFAIP3/IL10RA/UGC…	237
GO:0006911	BP	GO:0006911	phagocytosis, engulfment	86/5405	127/18903	5.80223e-20	7.96017e-18	5.02124e-18	GULP1/GATA2/ITGA2/RAC1/ELMO1/CD36/GSN/DOCK1/ANO6/THBS1/MYH9/RAC2/RHOH/RHOBTB1/MFGE8/ITGB2/IGHA1/BECN1/TRBC2/IGLL5/BIN2/RAB31/CLCN3/IGKC/FCGR2B/IGHA2/NCKAP1L/TRBC1/CDC42/AIF1/IGLC2/IGLC3/SH3BP1/CD300A/IGHG1/STAP1/FCGR1A/TREM2/MARCO/IGHM/MSR1/IGHV3-30/IGHV3-7/IGHV4-59/IGHV3-23/IGHV3-11/IGHV4-61/IGHV4-39/IGHG3/IGHV4-4/IGHG2/IGHV3-48/IGHV4-34/IGHV3-33/IGHV3-74/TRDC/IGHV3-72/IGHV1-3/IGHV3-43/C3/IGHV3-…	86
GO:0032970	BP	GO:0032970	regulation of actin filament-based process	202/5405	406/18903	8.66956e-20	1.16461e-17	7.34631e-18	ASAP3/WASF2/S1PR1/RHOC/GJA5/S100A10/ABL2/ROCK2/RHOB/PRKCE/SPTBN1/TACR1/TMSB10/NCKAP1/RHOA/FAM107A/PHLDB2/ADD1/LIMCH1/PAM/SYNPO/DBN1/EDN1/FSCN1/RAC1/ELN/CAV1/WASL/DLC1/DMTN/SORBS3/STC1/SFRP1/TEK/GSN/SPTAN1/ABL1/SWAP70/CDC42EP2/CTTN/RDX/DIXDC1/ESAM/JAM3/SVIL/NRP1/CXCL12/RAPGEF3/RND1/LIMA1/PXN/FERMT2/CYFIP1/TJP1/SPTBN5/TMOD2/TMOD3/FES/TAOK2/CORO1A/CX3CL1/FHOD1/CRK/ARHGEF15/CSF3/JUP/CDC42EP4/ACTG1/DS…	202
GO:0050864	BP	GO:0050864	regulation of B cell activation	120/5405	204/18903	1.46974e-19	1.93406e-17	1.22e-17	PTPRC/MEF2C/SFRP1/CD81/MMP14/CD40/CD320/SLC39A10/SAMSN1/PKN1/STAT6/TLR4/TNFAIP3/MZB1/AHR/LAPTM5/CD27/STAT5B/BAD/GPR183/IL2RG/IGHA1/CD38/IL6/ZFP36L1/TNIP2/TRBC2/IGLL5/PTEN/TYROBP/TBC1D10C/IGKC/XBP1/EXOSC6/FCGR2B/IGHA2/ZFP36L2/SASH3/IKZF3/NCKAP1L/TRBC1/PTPN6/NDFIP1/SYK/THEMIS2/IGLC2/IGLC3/CD300A/HMGB3/CD28/IGHG1/BTK/TNFRSF13B/CTLA4/CD19/IRS2/BCL2/IGHM/MNDA/IGHV3-30/CARD11/BLK/IGHV3-7/IGHV4-59/IGHV3…	120
GO:0097529	BP	GO:0097529	myeloid leukocyte migration	136/5405	242/18903	1.60921e-19	2.07524e-17	1.30905e-17	HRH1/ITGA9/CD200/VEGFC/EDN1/RAC1/SERPINE1/CD99/VEGFD/MTUS1/PTK2/CD81/SWAP70/PDGFD/JAM3/CXCL12/CD9/ANO6/KITLG/FLT1/MMP14/PGF/THBS1/EMP2/MAPK3/MMP2/CX3CL1/CCL2/MMP28/CCL14/CCL23/PECAM1/PLCB1/PIP5K1C/BCR/RAC2/PDGFB/LBP/HMGB1/EDNRB/RHOH/PPIA/ITGA1/CD99L2/IL17RC/ITGB2/BSG/PPIB/IL1R1/CCL4/STAT5B/CCL5/C1QBP/SELENOK/IL6/PDE4B/PREX1/NUP85/DNM1L/ANXA1/CCL3/WDR1/FCER1G/SPI1/NCKAP1L/ADAM8/JAGN1/AIF1/CCL21/SY…	136
GO:1903706	BP	GO:1903706	regulation of hemopoiesis	204/5405	413/18903	1.64334e-19	2.0777e-17	1.3106e-17	TAL1/PTPRC/SOX13/HLX/ITPKB/TGFBR2/CTNNB1/RHOA/GATA2/LEF1/MEF2C/SOX4/DLL1/HOXA7/TCIM/SFRP1/MYC/ABL1/ZBTB16/ETS1/ZEB1/ZMIZ1/RARG/KITLG/GAS6/MMP14/FBN1/FES/CSF3/KAT2A/JAG1/ZBTB46/HMGB1/LGALS9/NEDD9/FAM210B/SNAI2/MEIS2/RHOH/KLF10/PRMT1/HIF1A/IL15RA/SOS1/PNP/LRRC17/TLR4/CD46/CTNNBIP1/PPP3CA/ACVR2A/GABPA/EVI2B/PRKDC/PIAS3/FOXP1/RC3H2/CD27/STAT5B/SOCS5/IL4R/BAD/IL2RG/FOS/SMARCA4/PHF10/SMARCE1/CD2/METTL3…	204
GO:0030595	BP	GO:0030595	leukocyte chemotaxis	135/5405	240/18903	1.96104e-19	2.43169e-17	1.5339e-17	S1PR1/HRH1/ITGA9/VEGFC/EDN1/RAC1/SERPINE1/VEGFD/MTUS1/PTK2/PLEC/SWAP70/JAM3/CXCL12/ANO6/FLT1/GAS6/PGF/THBS1/MAPK3/CORO1A/MMP2/CX3CL1/CCL2/MMP28/CCL14/CCL23/PIP5K1C/RAC2/PDGFB/LBP/HMGB1/LGALS9/NEDD9/EDNRB/PPIA/CXCR4/ITGA1/TRPM4/HSD3B7/ZNF580/ADAM10/IL17RC/ITGB2/BSG/PPIB/CCL4/SLC12A2/GPR183/CCL5/C1QBP/GPSM3/ADAM17/IL6/PDE4B/CALR/SBDS/PREX1/NUP85/WNK1/DNM1L/ANXA1/CCL3/FCER1G/SPI1/NCKAP1L/ADAM8/AIF1/…	135
GO:0070661	BP	GO:0070661	leukocyte proliferation	178/5405	348/18903	3.56922e-19	4.34233e-17	2.73912e-17	PTPRC/TACR1/IGFBP2/TGFBR2/CTNNB1/HES1/LEF1/IL6ST/MEF2C/MSN/EFNB1/PTK2/IL33/ABL1/CD151/CD81/LRRC32/HHEX/KITLG/CD276/EMP2/MAPK3/CORO1A/CX3CL1/ACE/CD40/CD320/RAC2/HMGB1/LGALS9/SLC39A10/PKN1/SOS1/PNP/STAT6/TLR4/CD46/PPP3CA/CD3E/TNFAIP3/CLU/MZB1/CD79A/AHR/TP53/RC3H2/TWSG1/NCK1/STAT5B/PURA/GPR183/CCL5/HLA-E/CD38/SELENOK/PRKAR1A/IL6/LMBR1L/ARMC5/BST2/RASSF5/PRDX2/PTEN/TYROBP/VCAM1/BAP1/IL15/ANXA1/PTPN22…	178
GO:0099024	BP	GO:0099024	plasma membrane invagination	89/5405	136/18903	4.22647e-19	5.04672e-17	3.18345e-17	GULP1/RHOA/GATA2/ITGA2/RAC1/ELMO1/CD36/GSN/DOCK1/ANO6/THBS1/MYH9/RAC2/RHOH/RHOBTB1/MFGE8/ITGB2/SNX33/IGHA1/BECN1/TRBC2/IGLL5/BIN2/RAB31/CLCN3/IGKC/FCGR2B/IGHA2/NCKAP1L/TRBC1/CDC42/AIF1/ARF1/IGLC2/IGLC3/SH3BP1/CD300A/IGHG1/STAP1/FCGR1A/TREM2/MARCO/IGHM/MSR1/IGHV3-30/IGHV3-7/IGHV4-59/IGHV3-23/IGHV3-11/IGHV4-61/IGHV4-39/IGHG3/IGHV4-4/IGHG2/IGHV3-48/IGHV4-34/IGHV3-33/IGHV3-74/TRDC/IGHV3-72/IGHV1-3/IG…	89
GO:0032956	BP	GO:0032956	regulation of actin cytoskeleton organization	184/5405	365/18903	6.60907e-19	7.74824e-17	4.88755e-17	ASAP3/WASF2/S1PR1/RHOC/S100A10/ABL2/ROCK2/RHOB/PRKCE/SPTBN1/TACR1/TMSB10/NCKAP1/RHOA/FAM107A/PHLDB2/ADD1/LIMCH1/PAM/SYNPO/DBN1/EDN1/FSCN1/RAC1/ELN/WASL/DLC1/DMTN/SORBS3/SFRP1/TEK/GSN/SPTAN1/ABL1/SWAP70/CDC42EP2/CTTN/RDX/DIXDC1/ESAM/JAM3/SVIL/NRP1/CXCL12/RAPGEF3/RND1/LIMA1/PXN/FERMT2/CYFIP1/TJP1/SPTBN5/TMOD2/TMOD3/FES/TAOK2/CORO1A/CX3CL1/FHOD1/CRK/ARHGEF15/CSF3/CDC42EP4/ACTG1/DSTN/ID1/DAPK3/KANK3/…	184
GO:1902105	BP	GO:1902105	regulation of leukocyte differentiation	165/5405	317/18903	7.83691e-19	9.02365e-17	5.69207e-17	PTPRC/SOX13/HLX/ITPKB/TGFBR2/CTNNB1/RHOA/GATA2/LEF1/SOX4/HOXA7/SFRP1/MYC/ABL1/ZBTB16/ZEB1/ZMIZ1/KITLG/GAS6/MMP14/FBN1/FES/KAT2A/ZBTB46/HMGB1/LGALS9/NEDD9/RHOH/KLF10/IL15RA/SOS1/PNP/LRRC17/TLR4/CD46/CTNNBIP1/PPP3CA/EVI2B/PRKDC/PIAS3/FOXP1/RC3H2/CD27/STAT5B/SOCS5/IL4R/BAD/IL2RG/FOS/SMARCA4/PHF10/SMARCE1/CD2/METTL3/SMARCC2/ZFP36L1/RUNX3/EGR3/SMARCA2/GPR137/SMARCD1/CLPTM1/TFE3/SMARCD2/PRDX2/ARID1B/NR…	165
GO:0002274	BP	GO:0002274	myeloid leukocyte activation	132/5405	237/18903	1.549e-18	1.72859e-16	1.09039e-16	S100A13/PTPRC/PRKCE/DYSF/TGFBR2/HYAL2/CD200/GATA2/PLSCR1/ADGRF5/NDRG1/IL33/STXBP1/PTGDS/LTBR/THBS1/FES/CX3CL1/GRN/CD93/LDLR/NECTIN2/BCR/RAC2/APP/LBP/HMGB1/LGALS9/SNAP23/RHOH/DNASE1L3/TRAF3IP2/VAMP8/SPHK1/TLR4/ADAM10/SBNO2/ITGB2/CLU/IFNGR1/FOXP1/CST7/IL4R/SNCA/CCL5/PLA2G2A/CD2/IL6/STXBP2/TNIP2/PREX1/TYROBP/NMI/ADAM9/IRF4/IL15/CBL/ANXA1/CCL3/NR4A3/IFNGR2/FCER1G/STX4/MYO18A/SPI1/FCGR2B/DOCK2/SNX4/NR…	132
GO:0071674	BP	GO:0071674	mononuclear cell migration	119/5405	206/18903	1.55488e-18	1.72859e-16	1.09039e-16	S1PR1/ABL2/RHOA/CD200/APOD/SERPINE1/WASL/CD99/MSN/PTK2/PLEC/ABL1/PDGFD/CXCL12/ANO6/FLT1/GAS6/THBS1/MAPK3/CORO1A/CX3CL1/CRK/SPNS2/CCL2/CCL14/CCL23/PECAM1/PLCB1/MADCAM1/PDGFB/JAM2/APP/HMGB1/LGALS9/NEDD9/EXT1/LRCH1/CXCR4/ICAM1/EPS8/TRPM4/HSD3B7/F11R/CD99L2/ADAM10/AKT1/CCL4/SLC12A2/GPR183/CCL5/C1QBP/SELENOK/ADAM17/IL6/CALR/ITGB7/ITGA4/WNK1/ANXA1/CCL3/SPI1/DOCK8/MYO1G/ADAM8/CDC42/ZAP70/AIF1/CCL21/ITGA…	119
GO:0046631	BP	GO:0046631	alpha-beta T cell activation	105/5405	174/18903	2.05976e-18	2.25108e-16	1.41997e-16	PTPRC/HLX/ITPKB/TGFBR2/RHOA/LEF1/CTSL/ABL1/CD81/ZBTB16/NKX2-3/HMGB1/LGALS9/PNP/STAT6/CD3E/FOXP1/RC3H2/TWSG1/CD3D/SOCS5/IL4R/GPR183/IL2RG/HLA-E/IL6/NKG7/STAT3/RUNX3/ARMC5/TRBC2/RPL22/IRF4/IL15/ANXA1/MTOR/HLA-DRA/PTPN22/CD247/CD3G/SASH3/LY9/DOCK2/NCKAP1L/TRBC1/NDFIP1/ZAP70/SOCS1/STOML2/VSIR/SYK/ITK/PTGER4/SPN/CD86/CD300A/LILRB1/BATF/IL18/CD83/CD28/GATA3/TOX/LILRB4/IFNG/HSPH1/IL12RB1/CBLB/BCL11B/CRT…	105
GO:0046651	BP	GO:0046651	lymphocyte proliferation	159/5405	305/18903	2.79536e-18	3.00408e-16	1.89496e-16	PTPRC/TACR1/IGFBP2/TGFBR2/CTNNB1/HES1/LEF1/IL6ST/MEF2C/MSN/EFNB1/ABL1/CD151/CD81/LRRC32/KITLG/CD276/EMP2/CORO1A/CD40/CD320/RAC2/HMGB1/LGALS9/SLC39A10/PKN1/SOS1/PNP/TLR4/CD46/PPP3CA/CD3E/MZB1/CD79A/AHR/TP53/RC3H2/TWSG1/NCK1/STAT5B/PURA/GPR183/CCL5/HLA-E/CD38/SELENOK/PRKAR1A/IL6/LMBR1L/ARMC5/RASSF5/PRDX2/PTEN/TYROBP/VCAM1/IL15/ANXA1/PTPN22/HPRT1/SH2D2A/NCSTN/FCGR2B/SASH3/DOCK8/IKZF3/IL7R/DOCK2/BAX/…	159
GO:0002683	BP	GO:0002683	negative regulation of immune system process	214/5405	449/18903	4.15216e-18	4.38904e-16	2.76859e-16	PTPRC/HLX/CTNNB1/CD200/GATA2/APOD/PLK2/ADGRF5/EZR/DLL1/HOXA7/WASL/SFRP1/MYC/IL33/CD59/SERPING1/LRRC32/THY1/CXCL12/A2M/KITLG/THBS1/FBN1/CX3CL1/CRK/CCL2/MMP28/GRN/YES1/PLCB1/PLCG1/ZBTB46/LDLR/BCR/IFI16/HMGB1/LGALS9/SNAI2/SAMSN1/LRCH1/PPARG/PKN1/LRRC17/STAT6/TLR4/CD46/BANF1/APPL1/FURIN/AKT1/MICA/TNFAIP3/GBP1/DGKZ/PIAS3/AHR/RC3H2/LAPTM5/CST7/TWSG1/SOCS5/IL4R/CUEDC2/DUSP3/HLA-E/OAS3/IRAK3/PRKAR1A/METT…	214
GO:0032943	BP	GO:0032943	mononuclear cell proliferation	161/5405	312/18903	6.10486e-18	6.34906e-16	4.00496e-16	PTPRC/TACR1/IGFBP2/TGFBR2/CTNNB1/HES1/LEF1/IL6ST/MEF2C/MSN/EFNB1/ABL1/CD151/CD81/LRRC32/KITLG/CD276/EMP2/CORO1A/ACE/CD40/CD320/RAC2/HMGB1/LGALS9/SLC39A10/PKN1/SOS1/PNP/TLR4/CD46/PPP3CA/CD3E/MZB1/CD79A/AHR/TP53/RC3H2/TWSG1/NCK1/STAT5B/PURA/GPR183/CCL5/HLA-E/CD38/SELENOK/PRKAR1A/IL6/LMBR1L/ARMC5/RASSF5/PRDX2/PTEN/TYROBP/VCAM1/IL15/ANXA1/PTPN22/HPRT1/BCL2L1/SH2D2A/NCSTN/FCGR2B/SASH3/DOCK8/IKZF3/IL7R…	161
GO:0002440	BP	GO:0002440	production of molecular mediator of immune response	169/5405	333/18903	7.70792e-18	7.889e-16	4.97634e-16	PTPRC/NOD1/CD36/IL33/CD81/SWAP70/GPRC5B/CD40/TRAF3IP2/PKN1/HK1/TRPM4/STAT6/TLR4/MZB1/IL1R1/SLC7A5/PRKDC/DDX1/LAPTM5/IL4R/PMS2/CUEDC2/HLA-E/MAVS/IRAK3/UNG/IL6/MCM3AP/ACP5/BST2/SAMHD1/NR4A3/HLA-DRA/PTPN22/YY1/STX4/XBP1/EXOSC6/FCGR2B/SASH3/PHB2/CD96/NDFIP1/BCL10/TNF/DDX21/SYK/HSPD1/CD86/IL1B/HLA-DPA1/LILRB1/BATF/TREM1/IL18/CD28/GATA3/IGLV3-1/DNAJB9/BTK/LILRB4/SLAMF1/IGLV6-57/IGKV4-1/HLA-DQA1/CCR6/IG…	169
GO:0043542	BP	GO:0043542	endothelial cell migration	148/5405	281/18903	1.24925e-17	1.25862e-15	7.93934e-16	PLEKHG5/EPHA2/PIK3R3/PLPP3/RAB13/EFNA1/AKT3/ROCK2/RHOB/ATOH8/FAP/BMPR2/NRP2/RHOA/ADAMTS9/ROBO1/FSTL1/GATA2/PLXND1/KDR/VEGFC/PLK2/MEF2C/SPARC/FLT4/EDN1/SASH1/RAC1/MEOX2/BMPER/HSPB1/EPHB4/NOS3/ANGPT2/LOXL2/STC1/ADGRA2/FGFR1/PTK2/PTP4A3/TEK/KLF4/DAB2IP/ABL1/NOTCH1/PIK3C2A/PRCP/ETS1/JCAD/ITGB1/NRP1/MMRN2/HDAC7/ACVRL1/PXN/STARD13/EFNB2/CLEC14A/RHOJ/VASH1/THBS1/DLL4/NR2F2/EMP2/CDH5/BCAR1/CDH13/JUP/GRN/…	148
GO:1902903	BP	GO:1902903	regulation of supramolecular fiber organization	188/5405	384/18903	1.43974e-17	1.42823e-15	9.00919e-16	ASAP3/WASF2/S1PR1/RHOC/S100A10/CAMSAP2/ROCK2/PRKCE/SPTBN1/TACR1/TMSB10/NCKAP1/RHOA/PHLDB2/ADD1/LIMCH1/MAP1B/SYNPO/DBN1/EDN1/TNXB/RAC1/ELN/WASL/MID1/DLC1/DMTN/SORBS3/SFRP1/GSN/SPTAN1/ABL1/SWAP70/ARL2/CDC42EP2/CTTN/RDX/ESAM/SVIL/NRP1/CXCL12/RAPGEF3/LIMA1/PXN/ARHGEF7/FERMT2/CYFIP1/TJP1/SPTBN5/TMOD2/TMOD3/HDGFL3/FES/CORO1A/CX3CL1/CDH5/FHOD1/ARHGEF15/GIT1/CSF3/CDC42EP4/ACTG1/TBCD/DSTN/ID1/DAPK3/KANK3/…	188
GO:0022604	BP	GO:0022604	regulation of cell morphogenesis	160/5405	312/18903	1.6578e-17	1.61962e-15	1.02165e-15	MACF1/PALMD/RHOC/S100A10/PLXNA2/RHOB/LIMS2/EPHA4/FGD5/RHOA/DAG1/PLXND1/KDR/SH3D19/MYO10/DAB2/ARAP3/SPRY4/SPARC/DBN1/EZR/RAC1/MSN/DLC1/DMTN/ENPP2/PTK2/ABL1/PARVA/CD44/CDC42EP2/FZD4/RDX/FAM171A1/NRP1/DOCK1/RND1/FMNL3/FGD6/ARHGEF7/FERMT2/RHOJ/CYFIP1/FES/TAOK2/CORO1A/CFDP1/FBXO31/CRK/MYH10/CCL2/CDC42EP4/MYL12A/MYL12B/PALM/DAPK3/WTIP/ACTN4/CDC42EP5/MYH9/RAC2/CDC42EP1/TRIOBP/PARVB/NEDD9/EPB41L3/RHOH/TP…	160
GO:0051056	BP	GO:0051056	regulation of small GTPase mediated signal transduction	157/5405	305/18903	2.121e-17	2.04123e-15	1.2876e-15	PLEKHG5/ARHGAP29/ABL2/ITPKB/SIPA1L2/MAP4K4/CHN1/ITGAV/IQSEC1/FGD5/ROBO1/ARHGAP31/KALRN/HEG1/SPRY1/TRIO/ARHGEF28/F2R/RASGRF2/ARAP3/SPRY4/FLOT1/RGL2/PLEKHG1/RAC1/RASA4/STARD8/DLC1/PPP2CB/PREX2/DAB2IP/ABL1/NOTCH1/SWAP70/ARRB1/RDX/ARHGEF12/ITGB1/NRP1/KITLG/KCTD10/STARD13/LPAR6/MCF2L/INF2/ADGRG1/CRK/ARHGEF15/TNFAIP1/GIT1/ARHGAP23/RALGAPA2/TGM2/KANK2/F2RL3/GPR4/RASIP1/BCR/ARHGAP17/SRGAP2/RALBP1/MYO9A/O…	157
GO:0032496	BP	GO:0032496	response to lipopolysaccharide	170/5405	339/18903	2.7687e-17	2.62538e-15	1.65608e-15	ALPL/SELP/SELE/PRKCE/RHOA/PLSCR4/F2R/MEF2C/EDN1/SASH1/CD36/SERPINE1/NOS3/DAB2IP/ASS1/ABL1/NOTCH1/IL18BP/VIM/EFNB2/SMAD6/MAPK3/CX3CL1/PLSCR3/GIT1/CCL2/CSF3/ACE/THBD/TBXA2R/CARD8/BCR/LBP/AKAP12/HMGB1/LGALS9/EDNRB/LDOC1/CHMP5/TSPO/SCARB1/TLR4/SBNO2/AKT1/TNFAIP3/IL10RA/ADM/SLC7A5/RPS6KA3/TRIM5/FOXP1/SIGIRR/CAPN2/PABPN1/HDAC2/SNCA/TIMP4/FOS/CCL5/ADAM17/IRAK3/IL6/CNP/HADHB/PDE4B/TNIP2/CDK4/CARD16/PRDX3…	170
GO:0007266	BP	GO:0007266	Rho protein signal transduction	88/5405	140/18903	3.05452e-17	2.85443e-15	1.80056e-15	PLEKHG5/PHACTR4/ARHGAP29/ABL2/ROCK2/RHOB/RHOA/ROBO1/HEG1/ARHGEF28/F2R/RASGRF2/ARAP3/FLOT1/RAC1/STARD8/DLC1/CTNNAL1/ABL1/CDC42EP2/ARRB1/ARHGEF12/ITGB1/NRP1/KCTD10/STARD13/LPAR6/MCF2L/RHOJ/HACD3/ADGRG1/RIPOR1/CDH13/TAX1BP3/TNFAIP1/CDC42EP4/KANK2/F2RL3/GPR4/RASIP1/CDC42EP5/BCR/CDC42EP1/RALBP1/OPHN1/NET1/SYNJ2BP/STMN1/EPS8/F11R/MET/PDGFRB/RHOU/NGFR/WAS/GNA12/ARHGAP35/ARHGAP1/CDC42EP3/ARHGEF3/ARHGEF2/…	88
GO:0019058	BP	GO:0019058	viral life cycle	162/5405	319/18903	3.4333e-17	3.16256e-15	1.99493e-15	EPHA2/FCN3/NFIA/NR5A2/NUCKS1/CHMP3/ITGAV/DAG1/HYAL2/PLSCR1/ITGA2/SNX3/CAV2/CAV1/CTSL/GSN/STOM/NOTCH1/IFITM2/IFITM1/IFITM3/CD81/ITGB1/NRP1/CTBP2/ITGA5/EFNB2/GAS6/IFI27/NEDD4/HACD3/CCL2/INSR/LDLR/MVB12A/PVR/NECTIN2/ADARB1/IFI16/HMGB1/LGALS9/CHMP5/SCARB1/PPIA/VAMP8/PCSK5/CXCR4/ICAM1/ISG20/PCBP2/CD46/F11R/RAB1B/CHMP2A/BANF1/LAMTOR5/SCARB2/FURIN/LAMP1/BSG/ZNFX1/PPIB/TRIM8/IFIT1/UVRAG/TRIM5/LGALS1/PKN2…	162
GO:0002237	BP	GO:0002237	response to molecule of bacterial origin	177/5405	360/18903	7.56038e-17	6.86611e-15	4.33111e-15	ALPL/SELP/SELE/PRKCE/RHOA/PLSCR4/F2R/MEF2C/EDN1/SASH1/CD36/SERPINE1/NOS3/DAB2IP/ASS1/ABL1/NOTCH1/IL18BP/VIM/EFNB2/SMAD6/MAPK3/CX3CL1/PLSCR3/GIT1/CCL2/CSF3/ACE/THBD/TBXA2R/CARD8/BCR/LBP/AKAP12/HMGB1/LGALS9/EDNRB/LDOC1/CHMP5/TSPO/SCARB1/TLR4/TAP2/SBNO2/AKT1/TNFAIP3/IL10RA/ADM/SLC7A5/RPS6KA3/TRIM5/FOXP1/SIGIRR/CAPN2/PABPN1/HDAC2/SNCA/TIMP4/FOS/CCL5/ADAM17/IRAK3/IL6/CNP/HADHB/PDE4B/TNIP2/CDK4/CARD16/…	177
GO:0007229	BP	GO:0007229	integrin-mediated signaling pathway	75/5405	113/18903	7.78369e-17	6.97073e-15	4.3971e-15	PHACTR4/PLPP3/ITGA10/ADAM15/LAMC1/NID1/LIMS2/ITGA6/ITGAV/ITGA9/LAMB2/ITGA2/CTNNA1/LAMB1/DMTN/PTK2/ABL1/THY1/ITGB1/NRP1/DOCK1/ITGA5/CD63/FERMT2/EMP2/BCAR1/NME2/ITGB4/LAMA5/MADCAM1/MYH9/ADAMTS1/DST/NEDD9/ILK/TIMP1/ITGB1BP1/ITGA1/RCC2/FLNA/ADAM10/ITGB2/FYB1/LAMA2/PTPN11/ZYX/PTPRA/ITGA3/ITGB7/TLN1/ITGA4/PLEK/ADAM9/FERMT3/ITGA8/LIMS1/ITGB5/CDC42/ITGAL/LAT/PTN/SYK/COL3A1/ISG15/VAV1/PTK2B/HCK/ITGAX/FERM…	75
GO:0042098	BP	GO:0042098	T cell proliferation	118/5405	212/18903	1.08503e-16	9.58389e-15	6.04548e-15	PTPRC/IGFBP2/TGFBR2/CTNNB1/HES1/IL6ST/MSN/EFNB1/ABL1/CD151/CD81/LRRC32/KITLG/CD276/CORO1A/RAC2/HMGB1/LGALS9/SOS1/PNP/CD46/PPP3CA/CD3E/TP53/RC3H2/TWSG1/NCK1/STAT5B/CCL5/HLA-E/SELENOK/PRKAR1A/IL6/LMBR1L/ARMC5/PRDX2/PTEN/VCAM1/IL15/ANXA1/PTPN22/SH2D2A/NCSTN/SASH3/DOCK8/DOCK2/BAX/CCND3/NCKAP1L/PTPN6/NDFIP1/ZAP70/CD6/AIF1/VSIR/SYK/SPN/CD86/IL1B/HLA-DPA1/DHPS/LILRB1/IL18/HAVCR2/CD28/FYN/LILRB4/SLAMF1/C…	118
GO:0010810	BP	GO:0010810	regulation of cell-substrate adhesion	122/5405	222/18903	1.25256e-16	1.09142e-14	6.88464e-15	MACF1/S100A10/ADAM15/NID1/ROCK2/PRKCE/MAP4K4/LIMS2/FBLN2/RHOA/DAG1/FAM107A/PHLDB2/APOD/LIMCH1/KDR/DAB2/SPRY4/UTRN/RAC1/HOXA7/CD36/SERPINE1/ANGPT2/DLC1/DMTN/SFRP1/PTK2/TEK/ABL1/NOTCH1/ARL2/FZD4/THY1/RSU1/NRP1/PLAU/VCL/DOCK1/ACVRL1/ITGA5/ARHGEF7/MMP14/FERMT2/THBS1/PEAK1/EMP2/CX3CL1/CDH13/CRK/JUP/ACTG1/TBCD/JAG1/RIN2/DAPK3/ACTN4/FUT1/RRAS/PPM1F/RAC2/TRIOBP/PDGFB/VIT/NEDD9/DISC1/SLK/ATXN3/ILK/ITGB1BP…	122
GO:0002831	BP	GO:0002831	regulation of response to biotic stimulus	176/5405	361/18903	2.62416e-16	2.25608e-14	1.42312e-14	FCN3/CFH/PLSCR1/SASH1/NOD1/CD36/TSPAN6/SERPING1/MMRN2/HTRA1/A2M/MAPK3/CX3CL1/CYBA/CRK/GRN/SEC14L1/CDC37/PVR/NECTIN2/CARD8/LBP/IFI16/HMGB1/LGALS9/TRAF3IP2/PPARG/PCBP2/TRIM56/TLR4/BANF1/APPL1/HSP90AA1/MICA/TNFAIP3/LAMP1/ZNFX1/ZDHHC1/TRIM44/BIRC3/PRKDC/IFIT1/NCF1/TRIM5/AHR/FOXP1/SIGIRR/STAT5B/PUM1/CCDC92/PTPN11/CCL5/HLA-E/C1QBP/SELENOK/ANKRD17/MAVS/OAS3/IRAK3/METTL3/UFD1/CARD16/NPLOC4/ZMPSTE24/PRDX2…	176
GO:0070663	BP	GO:0070663	regulation of leukocyte proliferation	140/5405	269/18903	3.50578e-16	2.97437e-14	1.87622e-14	PTPRC/TACR1/IGFBP2/TGFBR2/CTNNB1/HES1/IL6ST/MEF2C/EFNB1/PTK2/IL33/CD81/LRRC32/HHEX/KITLG/CD276/MAPK3/CORO1A/CD40/CD320/RAC2/HMGB1/LGALS9/SLC39A10/PKN1/SOS1/PNP/STAT6/TLR4/CD46/PPP3CA/CD3E/TNFAIP3/MZB1/AHR/TWSG1/NCK1/STAT5B/GPR183/CCL5/HLA-E/CD38/SELENOK/PRKAR1A/IL6/BST2/RASSF5/PTEN/TYROBP/VCAM1/IL15/ANXA1/PTPN22/BCL2L1/FCGR2B/SASH3/IKZF3/GAL/NCKAP1L/PTPN6/NDFIP1/ZAP70/CD6/AIF1/VSIR/SYK/CSF2RB/SPN…	140
GO:0006979	BP	GO:0006979	response to oxidative stress	203/5405	434/18903	3.74577e-16	3.13672e-14	1.97863e-14	PINK1/SELENON/PXDN/RHOB/EPAS1/TACR1/STK25/CTNNB1/HYAL1/HYAL2/APOD/SELENOP/GPX8/MCTP1/ATOX1/STC2/EDN1/NCOA7/PTPRK/AQP1/HSPB1/CD36/PON2/NOS3/RBPMS/PPP2CB/ABL1/IL18BP/PDGFD/AKR1C3/PDLIM1/PLEKHA1/MGMT/MSRB3/NDUFA12/PXN/MMP14/PSMB5/PML/PDE8A/MAPK3/MMP2/NQO1/CRK/PCGF2/NFE2L1/MAP1LC3A/APP/RCAN1/AGAP3/CYP1B1/PRDX1/GPX3/ATP13A2/TPM1/PPIA/HIF1A/MPV17/NET1/CAMKK2/SPHK1/STAT6/TLR4/PKD2/MET/NEIL1/STX2/BANF1/Z…	203
GO:0042176	BP	GO:0042176	regulation of protein catabolic process	175/5405	361/18903	6.36991e-16	5.26579e-14	3.32164e-14	PINK1/OAZ3/RNF144A/SH3RF3/VGLL4/SH3D19/DAB2/PLK2/ECSCR/SNX3/EZR/CAV1/ASB9/MSN/SOX17/LAPTM4B/IL33/DAB2IP/CD81/RDX/NEDD4/ANXA2/OAZ2/NQO1/GABARAPL2/TIMP2/CST3/LDLR/TIMP3/ATP13A2/CSNK1E/PRKACA/BCAP31/PRICKLE1/OPHN1/EGLN2/ATXN3/TIMP1/EGLN1/ZYG11B/FLNA/HSP90AA1/FURIN/AKT1/SMAD3/TNFAIP3/GIPC1/CLU/ELOB/TMEM9/SNX12/SNX33/GSK3A/HERPUD1/PSMD10/FOXO1/APC/GNA12/USP13/SOCS5/RNF217/RBX1/SNCA/TIMP4/TNFSF12/PSMD1…	175
GO:0010952	BP	GO:0010952	positive regulation of peptidase activity	109/5405	194/18903	6.48103e-16	5.28983e-14	3.3368e-14	PINK1/EFNA1/ROCK2/EPHA4/BOK/RHOA/ROBO1/TNFSF10/F2R/NOD1/HIP1/FIS1/CAV1/BEX3/SOX7/DLC1/ASPH/MYC/GSN/PICALM/UACA/PML/GRN/CARD8/PPM1F/MAPK12/APP/SFRP2/IFI16/HMGB1/LGALS9/SVBP/BCAP31/PPARG/HIP1R/MTCH1/SMAD3/NGFR/PDCD6/LAPTM5/NLRP1/PDCD5/BAD/SNCA/STAT3/DAP/CTSH/LCK/HTRA2/APH1A/CASP10/HSF1/NCSTN/DDRGK1/BAX/VCP/RCN3/MBP/PSME3/PRELID1/BCL10/TNF/CYFIP2/NDUFA13/VSIR/SYK/HSPD1/HSPE1/PCOLCE/PMAIP1/PSENEN/FYN…	109
GO:0045619	BP	GO:0045619	regulation of lymphocyte differentiation	115/5405	210/18903	1.31614e-15	1.06081e-13	6.69153e-14	PTPRC/SOX13/HLX/ITPKB/TGFBR2/RHOA/LEF1/SOX4/SFRP1/ABL1/ZBTB16/ZEB1/ZMIZ1/GAS6/MMP14/KAT2A/HMGB1/LGALS9/RHOH/IL15RA/SOS1/PNP/CD46/PRKDC/RC3H2/CD27/STAT5B/SOCS5/IL4R/BAD/IL2RG/SMARCA4/PHF10/SMARCE1/CD2/METTL3/SMARCC2/ZFP36L1/RUNX3/EGR3/SMARCA2/SMARCD1/CLPTM1/SMARCD2/PRDX2/ARID1B/NRARP/IRF4/IL15/ANXA1/HLA-DRA/BRD7/XBP1/ARID1A/ZFP36L2/SASH3/ACTL6A/IKZF3/IL7R/NCKAP1L/ADAM8/PTPN6/NDFIP1/ZAP70/PRELID1/S…	115
GO:0009615	BP	GO:0009615	response to virus	192/5405	409/18903	1.52053e-15	1.21041e-13	7.63524e-14	FCN3/IFI44L/PTPRC/CHMP3/HYAL1/HYAL2/PLSCR1/HSPB1/TSPAN6/IL33/IFITM2/IFITM1/IFITM3/CXCL12/HTRA1/DCLK1/IFI27/PML/TBKBP1/SEC14L1/CD40/CARD8/MAPK11/ADARB1/IFI16/LGALS9/EXT1/PIM2/IFI44/TRAF3IP2/HIF1A/VAMP8/SERINC3/CXCR4/MLKL/AP1S1/ISG20/STMN1/PCBP2/TRIM56/BANF1/HSP90AA1/LAMTOR5/ABCC9/IFIT3/MICA/SMAD3/TNFAIP3/CLU/ZNFX1/ZDHHC1/GBP1/TRIM44/TRIM8/BIRC3/ZMYND11/IFIT1/CCL4/IFNGR1/TRIM5/DDX1/NLRP1/MOV10/PUM1…	192
GO:0019724	BP	GO:0019724	B cell mediated immunity	118/5405	218/18903	1.77195e-15	1.39336e-13	8.78926e-14	PTPRC/CFI/C7/CD81/SWAP70/SERPING1/CD40/NECTIN2/TRAF3IP2/STAT6/CD46/CLU/CD27/IL4R/IGHA1/HLA-E/C1QBP/UNG/C1R/TRBC2/C1RL/IGLL5/HLA-DRA/IGKC/FCER1G/EXOSC6/FCGR2B/IGHA2/TRBC1/PTPN6/NDFIP1/BCL10/TNF/CSF2RB/SLA2/HSPD1/C1S/IGLC2/IGLC3/HLA-DPA1/FCGR3A/IL21R/BATF/CD28/IGHG1/C1QA/BTK/C1QB/PRKCD/HLA-DQA1/CD70/C1QC/CD19/CCR6/FCGR1A/HLA-DPB1/TREM2/HLA-DOB/HLA-DQA2/HLA-DQB1/IGHM/XCL1/IGHV3-30/IGHV3-7/IGHV4-59/I…	118
GO:0043254	BP	GO:0043254	regulation of protein-containing complex assembly	192/5405	410/18903	2.06107e-15	1.60118e-13	1.01002e-13	PINK1/TAL1/RHOC/SELP/CAMSAP2/PRKCE/SPTBN1/TMSB10/RALB/NCKAP1/KIF9/RHOA/HES1/ADD1/MAP1B/DBN1/FSCN1/RAC1/ELN/CD36/MSN/DMTN/ASAP1/GSN/DAB2IP/STXBP1/SPTAN1/ABL1/ARL2/CDC42EP2/CTTN/RDX/ESAM/JAM3/SVIL/ARHGEF7/FERMT2/CYFIP1/SPTBN5/TMOD2/TMOD3/SMAD6/FES/CORO1A/CDH5/PIEZO1/GIT1/CSF3/CDC42EP4/TBCD/KANK3/CARD8/RASIP1/CDC42EP5/CDC42EP1/TRIOBP/HMGB1/DCTN1/PMEPA1/AIDA/LCP1/SSH1/HIP1R/STMN1/EPS8/KIRREL1/BRK1/TL…	192
GO:0071216	BP	GO:0071216	cellular response to biotic stimulus	135/5405	261/18903	2.25421e-15	1.73038e-13	1.09151e-13	CDA/PRKCE/RHOA/PLSCR4/MEF2C/SASH1/CD36/SERPINE1/NOS3/DAB2IP/ASS1/ABL1/NOTCH1/VIM/EFNB2/MAPK3/CX3CL1/PLSCR3/GIT1/CCL2/CSF3/TBXA2R/CARD8/BCR/LBP/HMGB1/EDNRB/LDOC1/CHMP5/TSPO/SCARB1/TLR4/SBNO2/AKT1/TNFAIP3/SLC7A5/TRIM5/TP53/SIGIRR/CAPN2/PABPN1/CCL5/IL6/HADHB/PDE4B/TNIP2/CDK4/CARD16/UPF1/MAPK14/ZMPSTE24/WFS1/PRDX2/ADAM9/CCL3/PTPN22/PRPF8/XBP1/HSF1/SPI1/FCGR2B/CCDC47/NR1D1/SIRT2/CD6/BCL10/MTDH/TMCO1/F…	135
GO:0002263	BP	GO:0002263	cell activation involved in immune response	149/5405	297/18903	2.44454e-15	1.8544e-13	1.16975e-13	S100A13/PTPRC/HLX/PRKCE/DYSF/GATA2/LEF1/DLL1/ITM2A/TCIM/IL33/STXBP1/ABL1/PTGDS/CD81/SWAP70/NKX2-3/FES/CORO1A/GRN/CD40/BCR/RAC2/APP/LBP/HMGB1/LGALS9/SNAP23/DNASE1L3/LCP1/VAMP8/MFNG/ICAM1/STAT6/TLR4/CD46/SBNO2/ITGB2/LAMP1/FOXP1/TP53/RC3H2/LGALS1/PHF14/SOCS5/IL4R/GPR183/UNG/IL6/NKG7/POU2AF1/STXBP2/STAT3/TYROBP/NMI/IRF4/EIF2AK4/CBL/ANXA1/CCL3/NR4A3/APBB1IP/MTOR/HLA-DRA/FCER1G/STX4/XBP1/EXOSC6/SPI1/FC…	149
GO:0010632	BP	GO:0010632	regulation of epithelial cell migration	147/5405	292/18903	2.5884e-15	1.9407e-13	1.22418e-13	EPHA2/MACF1/PLPP3/EFNA1/AKT3/ROCK2/RHOB/PRKCE/RTN4/TACR1/ATOH8/MAP4K4/BMPR2/NRP2/IQSEC1/TGFBR2/RHOA/HYAL1/PTPRG/ADAMTS9/GATA2/KDR/VEGFC/ITGA2/PLK2/MEF2C/HBEGF/SPARC/FLT4/EDN1/SASH1/RAC1/MEOX2/BMPER/HSPB1/NOS3/ANGPT2/STC1/ADGRA2/FGFR1/ENPP2/PTK2/TEK/KLF4/DAB2IP/ABL1/NOTCH1/PIK3C2A/PRCP/ETS1/JCAD/NRP1/MMRN2/DOCK1/HDAC7/ACVRL1/STARD13/RHOJ/VASH1/THBS1/DLL4/RAB11A/NR2F2/EMP2/BCAR1/JUP/GRN/MAP3K3/PTPR…	147
GO:0050670	BP	GO:0050670	regulation of lymphocyte proliferation	126/5405	239/18903	2.93268e-15	2.17143e-13	1.36972e-13	PTPRC/TACR1/IGFBP2/TGFBR2/CTNNB1/HES1/IL6ST/MEF2C/EFNB1/CD81/LRRC32/KITLG/CD276/CORO1A/CD40/CD320/RAC2/HMGB1/LGALS9/SLC39A10/PKN1/SOS1/PNP/TLR4/CD46/PPP3CA/CD3E/MZB1/AHR/TWSG1/NCK1/STAT5B/GPR183/CCL5/HLA-E/CD38/SELENOK/PRKAR1A/IL6/RASSF5/PTEN/TYROBP/VCAM1/IL15/ANXA1/PTPN22/FCGR2B/SASH3/IKZF3/GAL/NCKAP1L/PTPN6/NDFIP1/ZAP70/CD6/AIF1/VSIR/SYK/SPN/CD86/LST1/IL1B/HLA-DPA1/DHPS/CD300A/FCGR3A/LILRB1/IL1…	126
GO:0002697	BP	GO:0002697	regulation of immune effector process	180/5405	379/18903	2.96348e-15	2.17143e-13	1.36972e-13	FCN3/CFH/PTPRC/HLX/GATA2/NOD1/CD36/IL33/STXBP1/CD81/CD59/SERPING1/A2M/FES/GPRC5B/CRK/GRN/CD40/PVR/NECTIN2/BCR/RAC2/LBP/HMGB1/LGALS9/DNASE1L3/VAMP8/PKN1/ICAM1/HK1/TRPM4/STAT6/TLR4/CD46/TAP2/APPL1/ITGB2/MICA/LAMP1/MZB1/IL1R1/SLC7A5/NCF1/AHR/DDX1/RC3H2/LAPTM5/WAS/STAT5B/SOCS5/IL4R/CUEDC2/HLA-E/C1QBP/ANKRD17/MAVS/IRAK3/IL6/STXBP2/ACP5/BST2/TYROBP/IRF4/ANXA1/NR4A3/HLA-DRA/PTPN22/STX4/MYO18A/XBP1/EXOSC…	180
GO:2001233	BP	GO:2001233	regulation of apoptotic signaling pathway	178/5405	374/18903	3.29522e-15	2.38737e-13	1.50594e-13	PINK1/LMNA/PEA15/PTPRC/INHBB/ITGA6/ITGAV/ACKR3/BOK/CTNNB1/GNAI2/HYAL2/TNFSF10/MSX1/CTNNA1/TPD52L1/HSPB1/SERPINE1/FIS1/CAV1/NOS3/SRPX/FGFR1/SFRP1/MYC/DAB2IP/NACC2/CD44/CTTN/NRP1/CXCL12/UNC5B/ITPRIP/TCF7L2/LTBR/YBX3/BDKRB2/THBS1/PML/CX3CL1/PCGF2/SNAI1/TIMP3/PTTG1IP/SFRP2/STK3/SNAI2/BCAP31/PPIA/HIF1A/SERINC3/ICAM1/HDAC1/AKT1/TNFAIP3/TMEM14A/CLU/NGFR/ITM2C/ZMYND11/HERPUD1/PSMD10/TP53/NCK1/BAD/TRAF7/N…	178
GO:0043281	BP	GO:0043281	regulation of cysteine-type endopeptidase activity involved in apoptotic process	112/5405	205/18903	3.84585e-15	2.75534e-13	1.73806e-13	BOK/RHOA/ROBO1/TNFSF10/F2R/NOD1/AQP1/HIP1/FIS1/BEX3/SOX7/DLC1/MYC/KLF4/GSN/CD44/MGMT/GAS6/THBS1/UACA/PML/CARD8/PPM1F/SFRP2/HMGB1/LGALS9/BCAP31/PPARG/HIP1R/MTCH1/LAMTOR5/AKT1/SMAD3/BIRC3/NGFR/PDCD6/RPS6KA3/LAPTM5/CD27/NLRP1/PDCD5/BAD/DELE1/SNCA/TRIAP1/PARK7/DAP/CARD16/PRDX3/IFI6/INTS1/TNFAIP8/CTSH/LCK/HTRA2/PRDX5/CSNK2A1/CASP10/HSF1/BAX/VCP/PAK2/BCL10/TNF/ARRB2/NDUFA13/BIRC2/SYK/HSPD1/CRYAB/HSPE1/…	112
GO:0016064	BP	GO:0016064	immunoglobulin mediated immune response	116/5405	215/18903	4.18338e-15	2.96422e-13	1.86982e-13	PTPRC/CFI/C7/CD81/SWAP70/SERPING1/CD40/NECTIN2/TRAF3IP2/STAT6/CD46/CLU/CD27/IL4R/IGHA1/HLA-E/C1QBP/UNG/C1R/TRBC2/C1RL/IGLL5/HLA-DRA/IGKC/FCER1G/EXOSC6/FCGR2B/IGHA2/TRBC1/PTPN6/NDFIP1/BCL10/TNF/CSF2RB/HSPD1/C1S/IGLC2/IGLC3/HLA-DPA1/FCGR3A/IL21R/BATF/CD28/IGHG1/C1QA/BTK/C1QB/PRKCD/HLA-DQA1/C1QC/CD19/CCR6/FCGR1A/HLA-DPB1/TREM2/HLA-DOB/HLA-DQA2/HLA-DQB1/IGHM/XCL1/IGHV3-30/IGHV3-7/IGHV4-59/IGHV3-23/TB…	116
GO:0110053	BP	GO:0110053	regulation of actin filament organization	141/5405	278/18903	4.39082e-15	3.07739e-13	1.9412e-13	ASAP3/WASF2/S1PR1/RHOC/S100A10/ROCK2/PRKCE/SPTBN1/TACR1/TMSB10/NCKAP1/RHOA/PHLDB2/ADD1/LIMCH1/SYNPO/DBN1/RAC1/ELN/WASL/DLC1/DMTN/SORBS3/SFRP1/GSN/SPTAN1/ABL1/SWAP70/CDC42EP2/CTTN/RDX/ESAM/SVIL/NRP1/CXCL12/RAPGEF3/LIMA1/PXN/FERMT2/CYFIP1/TJP1/SPTBN5/TMOD2/TMOD3/CORO1A/CX3CL1/FHOD1/ARHGEF15/CSF3/CDC42EP4/ACTG1/DSTN/ID1/KANK3/CDC42EP5/PPM1F/CDC42EP1/TRIOBP/SHANK3/TPM1/SSH1/HIP1R/ITGB1BP1/STMN1/EPS8/…	141
GO:0003158	BP	GO:0003158	endothelium development	84/5405	139/18903	4.56349e-15	3.16402e-13	1.99585e-13	CLIC4/GJA4/TIE1/S1PR1/GJA5/CD34/ROCK2/RHOB/ATOH8/BMPR2/CTNNB1/RHOA/FSTL1/HEG1/ADD1/KDR/NOTCH4/EZR/AFDN/DLL1/PLOD3/MSN/STC1/SOX17/HEY1/COL15A1/NOTCH1/PDE2A/RDX/ROBO4/ZEB1/NRP1/VCL/TNFRSF1A/APOLD1/RAPGEF3/ACVRL1/STARD13/TJP1/DLL4/NR2F2/CDH5/PECAM1/PLCB1/JAG1/ID1/SOX18/CLDN5/COL18A1/EDNRB/CXCR4/ICAM1/F11R/MET/PRKD2/FOXP1/VEZF1/BTG1/RAPGEF2/FOXJ2/SMAD4/KRIT1/HOXB5/GSTM3/PDCD10/TNF/SLC40A1/CSNK2B/RAP1…	84
GO:0032944	BP	GO:0032944	regulation of mononuclear cell proliferation	127/5405	243/18903	5.44225e-15	3.70367e-13	2.33626e-13	PTPRC/TACR1/IGFBP2/TGFBR2/CTNNB1/HES1/IL6ST/MEF2C/EFNB1/CD81/LRRC32/KITLG/CD276/CORO1A/CD40/CD320/RAC2/HMGB1/LGALS9/SLC39A10/PKN1/SOS1/PNP/TLR4/CD46/PPP3CA/CD3E/MZB1/AHR/TWSG1/NCK1/STAT5B/GPR183/CCL5/HLA-E/CD38/SELENOK/PRKAR1A/IL6/RASSF5/PTEN/TYROBP/VCAM1/IL15/ANXA1/PTPN22/BCL2L1/FCGR2B/SASH3/IKZF3/GAL/NCKAP1L/PTPN6/NDFIP1/ZAP70/CD6/AIF1/VSIR/SYK/SPN/CD86/LST1/IL1B/HLA-DPA1/DHPS/CD300A/FCGR3A/LIL…	127
GO:0031349	BP	GO:0031349	positive regulation of defense response	152/5405	307/18903	5.45671e-15	3.70367e-13	2.33626e-13	FCN3/HYAL2/PLSCR1/MGST2/OSMR/ITGA2/IL6ST/MEF2C/NOD1/SERPINE1/FABP4/IL33/CD81/PDE2A/ETS1/MMRN2/TNFRSF1A/C2CD4B/GPRC5B/MAPK3/CX3CL1/CYBA/GRN/ACE/LDLR/PVR/NECTIN2/GPR4/APP/LBP/IFI16/HMGB1/VAMP8/TRIM56/TLR4/HSP90AA1/LAMP1/ZNFX1/ALOX5AP/PRKDC/TRIM5/LGALS1/STAT5B/NLRP1/CLOCK/SNCA/CCL5/HLA-E/GPSM3/MAVS/PLA2G2A/IL6/NKG7/PARK7/PARP9/TYROBP/NMI/IL15/XRCC5/CCL3/SPI1/DHX9/ZBP1/SNX4/COLEC11/NONO/PAK2/LSM14A/A…	152
GO:0043087	BP	GO:0043087	regulation of GTPase activity	178/5405	376/18903	6.18616e-15	4.15504e-13	2.62098e-13	AGRN/EPHA2/ASAP3/ARHGAP29/S1PR1/S100A10/RASAL2/RGL1/RGS1/PLXNA2/SIPA1L2/ASAP2/RASGRP3/MAP4K4/PKP4/ITGA6/RAPGEF4/CHN1/EPHA4/IQSEC1/FGD5/PLXND1/SPRY1/F2R/RASGRF2/ARAP3/RGL2/AFDN/RAPGEF5/RASA4/CAV2/SFRP1/ASAP1/PTK2/NTRK2/DAB2IP/ARL2/PICALM/RDX/THY1/RSU1/ITGB1/RAPGEF3/FGD6/DOCK9/ARHGEF7/FERMT2/CX3CL1/CRK/TAX1BP3/ARHGEF15/CCL2/CCL14/CCL23/TBC1D16/RALGAPA2/TGM2/CD40/DOCK6/RASIP1/BCR/SH3BP4/AGAP3/NEDD9/…	178
GO:0072676	BP	GO:0072676	lymphocyte migration	77/5405	124/18903	7.63789e-15	5.07723e-13	3.20269e-13	S1PR1/ABL2/RHOA/CD200/APOD/WASL/CD99/MSN/PLEC/ABL1/CXCL12/GAS6/CORO1A/CX3CL1/CRK/SPNS2/CCL2/CCL14/CCL23/MADCAM1/JAM2/APP/NEDD9/EXT1/LRCH1/ICAM1/HSD3B7/F11R/CD99L2/ADAM10/AKT1/CCL4/SLC12A2/GPR183/CCL5/SELENOK/ADAM17/ITGB7/ITGA4/WNK1/CCL3/DOCK8/MYO1G/ADAM8/ZAP70/AIF1/CCL21/ITGAL/CXCL11/SPN/PTK2B/CCL20/GATA3/CCR7/CCL3L1/CCR6/CRTAM/XCL2/PIK3CD/XCL1/RIPOR2/TBX21/PIK3CG/CXCL16/CD200R1/TNFSF14/CXCL13/OX…	77
GO:0072678	BP	GO:0072678	T cell migration	53/5405	73/18903	7.97225e-15	5.24541e-13	3.30878e-13	S1PR1/ABL2/RHOA/CD200/APOD/CD99/MSN/PLEC/ABL1/CXCL12/CORO1A/CRK/SPNS2/CCL2/APP/LRCH1/ICAM1/F11R/CD99L2/ADAM10/SLC12A2/GPR183/CCL5/SELENOK/ADAM17/ITGB7/ITGA4/WNK1/CCL3/DOCK8/MYO1G/ADAM8/ZAP70/AIF1/CCL21/ITGAL/CXCL11/SPN/CCL20/CCR6/XCL2/PIK3CD/XCL1/RIPOR2/PIK3CG/CXCL16/CD200R1/TNFSF14/CXCL13/OXSR1/TNFRSF14/PYCARD/IL27RA	53
GO:0022411	BP	GO:0022411	cellular component disassembly	217/5405	483/18903	8.10825e-15	5.28101e-13	3.33123e-13	DFFA/PINK1/ADAM15/NES/ADAMTS4/LAMC1/CAMSAP2/SPTBN1/CHMP3/MAP4K4/FAP/NOSTRIN/EPHA4/BOK/IQSEC1/KIF9/ADD1/MAP1B/FLOT1/FSCN1/FIS1/MID1/DMTN/ASPH/MYC/GSN/SPTAN1/SWAP70/CTTN/RDX/SVIL/LIMA1/MMP14/SPTBN5/TMOD2/TMOD3/HDGFL3/MMP2/CX3CL1/MMP15/GABARAPL2/PPP1R9B/DSTN/CST3/MAP1LC3A/SH3GL1/INSR/CDC37/TRIOBP/ADAMTS5/NEDD9/TECPR1/SNAI2/DCTN1/ATP13A2/CHMP5/TSPO/DNASE1L3/HIF1A/LCP1/MAP1S/VAMP8/SH3PXD2B/SNX7/STMN1/…	217
GO:0031532	BP	GO:0031532	actin cytoskeleton reorganization	71/5405	111/18903	9.35136e-15	6.02976e-13	3.80354e-13	S1PR1/SHC1/ABL2/HMCN1/CDC42BPA/RHOA/PDLIM4/PTK7/EZR/THSD7A/DMTN/PLEC/TEK/GSN/ABL1/PARVA/CTTN/ESAM/NRP1/RAPGEF3/CDC42BPB/TJP1/FES/BCAR1/CSF3/DAPK3/MYH9/PARVB/NEDD9/RAP2A/ABI3/EPS8/FLNA/F11R/MINK1/RALA/HRAS/SYDE1/GPR65/PLEK/ANXA1/ATP2C1/CDK5/CD2AP/MKLN1/BAIAP2/HCLS1/IQGAP2/FGF7/CDC42/PHPT1/PARVG/PTK2B/CSF1R/ASB2/ARHGDIA/TNIK/HCK/PAK1/STAP1/GMFG/CXADR/CLDN3/PTPN1/PHACTR1/SIPA1L1/KIT/GRB2/NOTCH2/ARHG…	71
GO:0002366	BP	GO:0002366	leukocyte activation involved in immune response	146/5405	293/18903	9.58573e-15	6.11968e-13	3.86027e-13	S100A13/PTPRC/HLX/PRKCE/DYSF/GATA2/LEF1/DLL1/ITM2A/IL33/STXBP1/ABL1/PTGDS/CD81/SWAP70/NKX2-3/FES/CORO1A/GRN/CD40/BCR/RAC2/LBP/HMGB1/LGALS9/SNAP23/DNASE1L3/LCP1/VAMP8/MFNG/ICAM1/STAT6/TLR4/CD46/SBNO2/ITGB2/LAMP1/FOXP1/TP53/RC3H2/LGALS1/PHF14/SOCS5/IL4R/GPR183/UNG/IL6/NKG7/POU2AF1/STXBP2/STAT3/TYROBP/NMI/IRF4/EIF2AK4/CBL/ANXA1/CCL3/NR4A3/APBB1IP/MTOR/HLA-DRA/FCER1G/STX4/XBP1/EXOSC6/SPI1/FCGR2B/LY9/…	146
GO:0052547	BP	GO:0052547	regulation of peptidase activity	208/5405	459/18903	1.00272e-14	6.33876e-13	3.99846e-13	PINK1/EFNA1/ROCK2/CRIM1/TFPI/EPHA4/BOK/RHOA/ROBO1/PROS1/LXN/TNFSF10/F2R/SERPINB6/PI16/CD109/NOD1/AQP1/HIP1/SERPINE1/FIS1/CAV1/BEX3/SOX7/DLC1/ASPH/MYC/KLF4/GSN/CD44/SERPING1/SERPINH1/PICALM/APLP2/ITIH5/MGMT/A2M/GAS6/SERPINA3/THBS1/ANXA2/UACA/PML/GRN/TIMP2/CST3/CARD8/PPM1F/TIMP3/MAPK12/APP/SFRP2/IFI16/HMGB1/LGALS9/SVBP/ATP13A2/BCAP31/PPARG/TIMP1/HIP1R/HDAC1/CSTB/MTCH1/LAMTOR5/FURIN/AKT1/SMAD3/BIRC3…	208
GO:0010563	BP	GO:0010563	negative regulation of phosphorus metabolic process	201/5405	441/18903	1.39525e-14	8.73454e-13	5.50971e-13	CDA/PLPP3/PTPRC/ROCK2/SH3BP5/GNAI2/HYAL2/HEG1/WWTR1/SPRY1/SPRY4/CD109/CNKSR3/PRKAR1B/IGFBP3/GRB10/HSPB1/FIS1/CAV1/DMTN/SFRP1/FABP4/PLEC/GNAQ/DAB2IP/ENG/ABL1/SWAP70/HIPK3/LRP5/THY1/HHEX/LRP6/CTDSP2/PTPRB/DUSP6/SH2B3/LATS2/BDKRB2/SMAD6/NR2F2/YWHAE/GIT1/PIP4K2B/PPP1R9B/SOCS3/FKBP1A/PKIG/RASIP1/PPM1F/PDGFB/ADARB1/SFRP2/SPRED1/PMEPA1/TSPO/DUSP7/SAMSN1/YWHAG/AIDA/PPIA/PPARG/CDKN1C/SPRED2/DNAJC10/PKN1/I…	201
GO:0150115	BP	GO:0150115	cell-substrate junction organization	66/5405	101/18903	1.74643e-14	1.08279e-12	6.83016e-13	MACF1/S100A10/LAMC1/ROCK2/MAP4K4/ITGA6/IQSEC1/RHOA/FAM107A/PHLDB2/APOD/LIMCH1/KDR/ITGA2/PTPRK/RAC1/DLC1/DMTN/SFRP1/PTK2/PLEC/TEK/ABL1/CTTN/THY1/NRP1/VCL/ACVRL1/ITGA5/THSD1/ARHGEF7/MMP14/FERMT2/ACTN1/THBS1/PEAK1/TAOK2/ITGB4/ACTG1/DAPK3/PPM1F/BCR/DST/SLK/LAMTOR2/ITGB1BP1/RCC2/STON1/SMAD3/DUSP3/PTPRA/SORBS1/TLN1/PTEN/DUSP22/CORO1C/LIMS1/POLDIP2/PTK2B/BCL2/VEGFA/SDC4/PTPRJ/ARF6/RAB8B/PIK3R1	66
GO:0000302	BP	GO:0000302	response to reactive oxygen species	110/5405	204/18903	2.24963e-14	1.3782e-12	8.69362e-13	PINK1/RHOB/TACR1/STK25/HYAL1/HYAL2/APOD/EDN1/PTPRK/AQP1/CD36/NOS3/PPP2CB/ABL1/IL18BP/PDGFD/AKR1C3/PLEKHA1/PXN/PDE8A/MAPK3/MMP2/NQO1/CRK/PCGF2/MAP1LC3A/AGAP3/CYP1B1/PRDX1/TPM1/HIF1A/MPV17/NET1/CAMKK2/SPHK1/STAT6/PKD2/MET/ZNF580/KLF2/AKT1/TNFAIP3/UCP2/PDGFRB/ROMO1/NCF1/FOXP1/FBLN5/CAPN2/HDAC2/BAD/FOS/PRKAA1/BECN1/AREG/HP/IL6/PARK7/TRAP1/TXN/PDK2/PRDX3/IMPACT/PRDX2/ADAM9/APEX1/PRDX5/ANXA1/NR4A3/SETX…	110
GO:0045936	BP	GO:0045936	negative regulation of phosphate metabolic process	200/5405	440/18903	2.26565e-14	1.3782e-12	8.69362e-13	CDA/PLPP3/PTPRC/ROCK2/SH3BP5/GNAI2/HYAL2/HEG1/WWTR1/SPRY1/SPRY4/CD109/CNKSR3/PRKAR1B/IGFBP3/GRB10/HSPB1/FIS1/CAV1/DMTN/SFRP1/FABP4/PLEC/GNAQ/DAB2IP/ENG/ABL1/SWAP70/HIPK3/LRP5/THY1/HHEX/LRP6/CTDSP2/PTPRB/DUSP6/SH2B3/LATS2/BDKRB2/SMAD6/NR2F2/YWHAE/GIT1/PIP4K2B/PPP1R9B/SOCS3/FKBP1A/PKIG/RASIP1/PPM1F/PDGFB/ADARB1/SFRP2/SPRED1/PMEPA1/TSPO/DUSP7/SAMSN1/YWHAG/AIDA/PPIA/PPARG/CDKN1C/SPRED2/DNAJC10/PKN1/I…	200
GO:0097191	BP	GO:0097191	extrinsic apoptotic signaling pathway	118/5405	224/18903	2.38455e-14	1.43697e-12	9.06433e-13	LMNA/PEA15/PTPRC/ITGA6/ITGAV/BOK/HYAL2/TNFSF10/CTNNA1/SERPINE1/CAV1/NOS3/SRPX/BEX3/TNFRSF10B/FGFR1/SFRP1/IL33/DAB2IP/CTTN/NRP1/UNC5B/ITPRIP/TCF7L2/TNFRSF1A/LTBR/KITLG/IFI27/THBS1/PML/CX3CL1/TIMP3/SFRP2/STK3/ZDHHC3/SNAI2/ICAM1/AKT1/SMAD3/TNFAIP3/ITM2C/ZMYND11/GSK3A/CD27/BAD/DELE1/TNFSF12/STK4/PPP2R1A/BAG3/ARHGEF2/DEPTOR/PARK7/BCL2L2/PDIA3/IFI6/PPP2R1B/TNFRSF10A/PRDX2/PTEN/HTRA2/BCL2A1/BCL2L1/TMBIM…	118
GO:0048872	BP	GO:0048872	homeostasis of number of cells	146/5405	296/18903	2.7832e-14	1.66167e-12	1.04818e-12	TAL1/TGFBR3/ITPKB/AKT3/EPAS1/FSTL1/GATA2/EMCN/F2R/MEF2C/SMAD5/SOX4/ADGRF5/MYCT1/ZNHIT1/NOS3/DMTN/ABL1/NOTCH1/ETS1/JAM3/NKX2-3/KITLG/SH2B3/TMOD3/CORO1A/ADGRG1/SPNS2/BCR/HMGB1/CRISPLD1/LGALS9/FAM210B/ARMCX1/PRDX1/EXT1/PRMT1/TRAF3IP2/HIF1A/TMEM14C/PKN1/SOS1/ACVR2A/GLIS2/KLF2/AKT1/TNFAIP3/SRF/PRKDC/ASXL1/THRA/RC3H2/STAT5B/GPR183/PTPN11/PLA2G2A/ADAM17/IL6/ZBTB7A/PDE4B/OCIAD1/STAT3/ZFP36L1/IKZF1/HOXA5/…	146
GO:2000116	BP	GO:2000116	regulation of cysteine-type endopeptidase activity	122/5405	235/18903	3.51642e-14	2.08017e-12	1.31216e-12	BOK/RHOA/ROBO1/TNFSF10/F2R/NOD1/AQP1/HIP1/FIS1/BEX3/SOX7/DLC1/ASPH/MYC/KLF4/GSN/CD44/MGMT/GAS6/THBS1/UACA/PML/CST3/CARD8/PPM1F/SFRP2/IFI16/HMGB1/LGALS9/BCAP31/PPARG/HIP1R/MTCH1/LAMTOR5/AKT1/SMAD3/BIRC3/NGFR/PDCD6/RPS6KA3/LAPTM5/CST7/CD27/NLRP1/PDCD5/BAD/DELE1/SNCA/TRIAP1/PARK7/DAP/CARD16/PRDX3/IFI6/INTS1/TNFAIP8/CTSH/LCK/HTRA2/PRDX5/CSNK2A1/CASP10/HSF1/CAST/BAX/VCP/PAK2/BCL10/TNF/CYFIP2/ARRB2/NDU…	122
GO:0030099	BP	GO:0030099	myeloid cell differentiation	187/5405	407/18903	4.60535e-14	2.69938e-12	1.70275e-12	EPHA2/WASF2/TAL1/TGFBR3/ITPKB/EPAS1/TGFBR2/CTNNB1/SNRK/GATA2/LEF1/MEF2C/SMAD5/ADGRF5/CD109/DLL1/HOXA7/PIR/DMTN/SFRP1/MYC/CD81/ZBTB16/ETS1/NKX2-3/LTBR/RARG/KITLG/SH2B3/ACTN1/FBN1/TMOD3/ANXA2/PML/FES/DHRS7B/CSF3/JAG1/ZBTB46/MYH9/APP/IFI16/NEDD9/FAM210B/MEIS2/KLF10/PRMT1/HIF1A/PPARG/TMEM14C/LRRC17/TLR4/FLNA/CTNNBIP1/PPP3CA/ACVR2A/KLF2/HOXB7/SBNO2/FLI1/GABPA/EVI2B/SH3PXD2A/SRF/PRKDC/PIAS3/THRA/FOXP1/…	187
GO:0044089	BP	GO:0044089	positive regulation of cellular component biogenesis	220/5405	498/18903	4.64688e-14	2.69938e-12	1.70275e-12	AGRN/CLSTN1/EPHA2/PINK1/WASF2/TAL1/FNBP1L/RHOC/S100A10/DNM3/ROCK2/PRKCE/TACR1/MAP4K4/RALB/NCKAP1/RHOA/DAG1/HYAL1/PHLDB2/LDB2/LIMCH1/KDR/MAP1B/DPYSL3/SYNPO/FLOT1/FSCN1/RAC1/CD36/CAV1/WASL/MSN/SORBS3/SFRP1/ASAP1/TEK/NTRK2/DAB2IP/ABL1/SWAP70/ARL2/CDC42EP2/CTTN/PHLDB1/THY1/NRP1/CLSTN3/RAPGEF3/PXN/FERMT2/FLRT2/CYFIP1/FES/CX3CL1/CDH5/FHOD1/PIEZO1/ARHGEF15/GIT1/PIP4K2B/CSF3/CDC42EP4/ID1/PALM/RASIP1/CDC4…	220
GO:0045580	BP	GO:0045580	regulation of T cell differentiation	99/5405	179/18903	5.35256e-14	3.08154e-12	1.94382e-12	PTPRC/SOX13/HLX/ITPKB/TGFBR2/RHOA/LEF1/SOX4/ABL1/ZBTB16/ZEB1/ZMIZ1/KAT2A/HMGB1/LGALS9/RHOH/SOS1/PNP/CD46/RC3H2/CD27/STAT5B/SOCS5/IL4R/BAD/IL2RG/SMARCA4/PHF10/SMARCE1/CD2/METTL3/SMARCC2/RUNX3/EGR3/SMARCA2/SMARCD1/CLPTM1/SMARCD2/PRDX2/ARID1B/NRARP/IRF4/IL15/ANXA1/HLA-DRA/BRD7/XBP1/ARID1A/SASH3/ACTL6A/IL7R/NCKAP1L/ADAM8/ZAP70/PRELID1/SOCS1/VSIR/SYK/CD86/BATF/IL18/CD83/CD28/CAMK4/GATA3/TOX/LILRB4/IFN…	99
GO:0001952	BP	GO:0001952	regulation of cell-matrix adhesion	76/5405	125/18903	5.75e-14	3.25228e-12	2.05152e-12	MACF1/S100A10/ADAM15/ROCK2/MAP4K4/RHOA/DAG1/FAM107A/PHLDB2/APOD/LIMCH1/KDR/UTRN/RAC1/HOXA7/CD36/SERPINE1/DLC1/DMTN/SFRP1/PTK2/TEK/ABL1/THY1/NRP1/PLAU/VCL/ACVRL1/MMP14/FERMT2/THBS1/PEAK1/EMP2/CX3CL1/CDH13/JUP/ACTG1/JAG1/RIN2/DAPK3/FUT1/RRAS/PPM1F/DISC1/SLK/ITGB1BP1/RCC2/EFEMP2/MINK1/CD3E/SMAD3/DUSP3/PTPRA/TLN1/PTEN/SKAP1/RASA1/DUSP22/CORO1C/LIMS1/CCL21/POLDIP2/PTK2B/CCR7/CDKN2A/BCL2/VEGFA/PLEKHA2/…	76
GO:0010811	BP	GO:0010811	positive regulation of cell-substrate adhesion	76/5405	125/18903	5.75e-14	3.25228e-12	2.05152e-12	S100A10/NID1/PRKCE/MAP4K4/LIMS2/FBLN2/DAG1/KDR/DAB2/UTRN/RAC1/CD36/DMTN/SFRP1/TEK/ABL1/ARL2/THY1/RSU1/NRP1/DOCK1/ITGA5/ARHGEF7/FERMT2/EMP2/CX3CL1/CDH13/CRK/JUP/RIN2/FUT1/RRAS/PPM1F/TRIOBP/PDGFB/VIT/NEDD9/DISC1/ILK/ITGB1BP1/HSD17B12/FLNA/EFEMP2/CD3E/SMAD3/EDIL3/C1QBP/STK4/CALR/ITGA3/CCDC80/PREX1/SKAP1/LIMS1/CDC42/CCL21/POLDIP2/SPOCK2/PTK2B/AGR2/CCR7/UNC13D/VEGFA/PLEKHA2/SDC4/FERMT1/DOCK5/CEACAM6/C…	76
GO:0002377	BP	GO:0002377	immunoglobulin production	115/5405	219/18903	6.78352e-14	3.80349e-12	2.39922e-12	PTPRC/IL33/SWAP70/CD40/TRAF3IP2/PKN1/STAT6/MZB1/PRKDC/IL4R/PMS2/HLA-E/UNG/IL6/MCM3AP/SAMHD1/HLA-DRA/YY1/STX4/XBP1/EXOSC6/FCGR2B/SASH3/PHB2/NDFIP1/TNF/HSPD1/CD86/HLA-DPA1/BATF/CD28/IGLV3-1/DNAJB9/BTK/IGLV6-57/IGKV4-1/HLA-DQA1/CCR6/IGKV3-20/HLA-DPB1/HLA-DOB/HLA-DQA2/IGKV1-5/HLA-DQB1/XCL1/IGLV2-14/IGLV1-47/TBX21/IGKV3D-20/IGKV1-9/IGLV1-40/IGLV1-44/TMIGD2/IGKV3D-11/TMBIM6/IGKV1-12/IL10/IGLV2-11/FOXP3…	115
GO:0031647	BP	GO:0031647	regulation of protein stability	156/5405	325/18903	6.92964e-14	3.85192e-12	2.42978e-12	PINK1/PLPP3/EFNA1/DPM3/LMNA/RTN4/EPHA4/CRTAP/FAM107A/MSX1/SOX4/FLOT1/HIP1/SOX17/ASPH/GPIHBP1/GNAQ/GSN/STXBP1/CD81/PARVA/CTNND1/SAV1/SERF2/TMEM88/KAT2A/GRN/CDC37/STK3/P3H1/DAD1/PIM2/WIZ/HIP1R/RUVBL1/NLK/FLNA/HSP90AA1/PFDN1/SMAD3/LAMP1/GIPC1/CLU/PPIB/TRIM44/STX12/SH3GLB1/PRKDC/FLOT2/TP53/PER3/PFDN4/TBX3/USP13/SNCA/TARDBP/ZSWIM7/HCFC1/BAG6/PFDN2/MOSMO/STK4/BAG3/TELO2/CALR/PARK7/TNIP2/POLR2E/B4GALT5/…	156
GO:0006910	BP	GO:0006910	phagocytosis, recognition	66/5405	103/18903	7.16748e-14	3.95008e-12	2.49169e-12	FCN3/PEAR1/CD36/LBP/SCARB1/MFGE8/IGHA1/TRBC2/IGLL5/IGKC/MYO18A/IGHA2/COLEC11/TRBC1/COLEC12/IGLC2/IGLC3/IGHG1/FCGR1A/TREM2/IGHM/FCN1/IGHV3-30/IGHV3-7/IGHV4-59/IGHV3-23/IGHV3-11/IGHV4-61/IGHV4-39/IGHG3/IGHV4-4/IGHG2/IGHV3-48/IGHV4-34/IGHV3-33/IGHV3-74/TRDC/IGHV3-72/IGHV1-3/IGHV3-43/IGHV3-15/IGHV1-24/IGHV3-21/IGHV4-31/IGHV1-69D/IGHG4/CLEC7A/IGHV4-28/PTX3/IGHV3-20/IGHV3-53/IGHV1-18/IGHV5-51/IGHV3-66/…	66
GO:0002181	BP	GO:0002181	cytoplasmic translation	91/5405	161/18903	9.87151e-14	5.39419e-12	3.40263e-12	YBX3/RPS26/RPS28/RPL26L1/PAIP1/EIF3B/EIF4G1/NCK1/EIF3I/SYNCRIP/MCTS1/DHX29/EIF4A1/RWDD1/METTL3/HNRNPD/EIF2S2/RPS8/NEMF/RPS13/RPL22/DRG2/DENR/MTOR/EIF2D/DHX9/RPL32/EIF4H/YTHDF2/EIF2B3/YBX1/RPL36A/RPS7/RPS24/RPS17/RPL29/RPLP0/RPSA/RPS23/RPL5/SH3BGRL/RPL13A/RPS27/EIF3J/RPL34/ZC3H15/CSDE1/RPL36/RPL12/RPL23/RPL41/RPL24/RPS16/RPL15/RPL7A/EIF3D/RPL26/RPL23A/RPL6/EIF5/RPS6/RPL3/RPL7/EIF3L/RPS29/RPS19/RPL…	91
GO:0062197	BP	GO:0062197	cellular response to chemical stress	163/5405	345/18903	1.06444e-13	5.76765e-12	3.63821e-12	PINK1/SELENON/RHOB/EPAS1/STK25/CTNNB1/MYLK/GPX8/SERPINB6/EDN1/NCOA7/PTPRK/AQP1/HSPB1/CD36/CAV1/NOS3/PLEC/ABL1/IL18BP/PDGFD/AKR1C3/PLEKHA1/MGMT/YBX3/PXN/BDKRB2/PML/PDE8A/MAPK3/MMP2/NQO1/PCGF2/NFE2L1/MAP1LC3A/AGAP3/CYP1B1/LRRC8C/PRDX1/ATP13A2/TSPO/TPM1/PPIA/HIF1A/MPV17/NET1/CAMKK2/SPHK1/STAT6/TLR4/PIK3CA/PKD2/MET/STX2/ZNF580/KLF2/ATP2A2/AKT1/TNFAIP3/ROMO1/GPX7/NCF1/FOXP1/TP53/FOXO1/FBLN5/HDAC2/BAD/…	163
GO:0034976	BP	GO:0034976	response to endoplasmic reticulum stress	131/5405	261/18903	1.12643e-13	6.01862e-12	3.79652e-12	BOK/RASGRF2/STC2/FLOT1/MARCKS/CAV1/SRPX/TNFRSF10B/PPP2CB/DAB2IP/ABL1/CCND1/THBS1/PML/UBXN8/BCAP31/ATXN3/DNAJC10/SERINC3/ERLIN1/ATP2A2/TMTC4/CLU/UBE2G2/HERPUD1/TP53/EIF4G1/DNAJC18/NCK1/DERL3/USP13/CANX/ERMP1/TXNDC12/MBTPS1/BAG6/SELENOK/UGGT2/CALR/TMEM259/PARK7/GRINA/UFD1/TRIM25/TMTC3/PDIA3/UBXN6/COPS5/ATF6B/NPLOC4/MAN1B1/VAPB/EIF2S1/WFS1/EIF2AK2/SCAMP5/EIF2AK4/BFAR/BCL2L1/OS9/XBP1/SVIP/AMFR/HSP90B…	131
GO:0034341	BP	GO:0034341	response to interferon-gamma	82/5405	140/18903	1.12992e-13	6.01862e-12	3.79652e-12	VAMP3/FLNB/EDN1/GSN/STXBP1/ASS1/IFITM2/IFITM1/IFITM3/CDC42EP2/VIM/CX3CL1/MYO1C/CCL2/CCL14/CCL23/CDC42EP4/ACTG1/CD40/DAPK3/CDC37/LGALS9/PPARG/GBP4/TLR4/GBP1/CCL4/IFNGR1/TP53/WAS/SYNCRIP/SNCA/CCL5/ZYX/BST2/PARP9/NMI/CALCOCO2/CCL3/PARP14/IFNGR2/STX4/JAK1/SLC26A6/KIF5B/UBD/VPS26B/CDC42/SOCS1/AIF1/CCL21/TNF/GBP5/RPL13A/HLA-DPA1/CCL20/CCL3L1/IFNG/HCK/IL12RB1/IRF8/GBP2/XCL2/TLR2/XCL1/FASLG/SLC11A1/CXCL1…	82
GO:0007162	BP	GO:0007162	negative regulation of cell adhesion	149/5405	308/18903	1.13876e-13	6.01862e-12	3.79652e-12	ADAM15/PTPRC/PLXNA2/HLX/MAP4K4/EPHA4/RHOA/FAM107A/PHLDB2/PLXND1/APOD/SEMA6A/SPRY4/NOTCH4/HOXA7/SERPINE1/PODXL/ANGPT2/DLC1/DMTN/PTK2/KLF4/ASS1/ABL1/NOTCH1/SWAP70/LRRC32/FZD4/RDX/JAM3/CXCL12/CD9/RND1/ACVRL1/SH2B3/MMP14/THBS1/MMP2/CX3CL1/ADAMTS18/CDH13/TBCD/JAG1/ACTN4/PPM1F/HMGB1/LGALS9/CYP1B1/SNAI2/ITGB1BP1/RCC2/ADAM10/AKT1/PLXNB2/GBP1/RC3H2/LAPTM5/TWSG1/SOCS5/IL4R/PTPN11/DUSP3/C1QTNF1/RGCC/PRKAR1A…	149
GO:0071559	BP	GO:0071559	response to transforming growth factor beta	137/5405	277/18903	1.32734e-13	6.95827e-12	4.38925e-12	TGFBR3/ROCK2/FNDC4/TGFBR2/CLEC3B/HYAL2/SPRY1/SMAD1/DAB2/MEF2C/NREP/SMAD5/EDN1/CD109/PTPRK/CAV2/CAV1/SFRP1/PTK2/ENG/ABL1/ADAMTSL2/LTBP3/PDE2A/LRRC32/PDGFD/ZEB1/ZMIZ1/HTRA1/ACVRL1/PXN/LATS2/SMAD9/COL4A2/FERMT2/THBS1/FBN1/SMAD6/PML/TGFB1I1/CDH5/ZFHX3/CRK/SMURF2/YES1/FKBP1A/ID1/CLDN5/LTBP1/CILP/SPRED1/PMEPA1/PPARG/CDKN1C/SPRED2/HDAC1/SKI/NLK/HTRA3/APPL1/IGF1R/FURIN/SMAD3/GIPC1/TP53/SMAD2/TWSG1/GLG1/P…	137
GO:0042326	BP	GO:0042326	negative regulation of phosphorylation	176/5405	381/18903	1.42005e-13	7.38424e-12	4.65794e-12	PLPP3/PTPRC/SH3BP5/HYAL2/HEG1/WWTR1/SPRY1/SPRY4/CD109/CNKSR3/PRKAR1B/IGFBP3/GRB10/HSPB1/CAV1/DMTN/SFRP1/FABP4/PLEC/GNAQ/DAB2IP/ENG/ABL1/HIPK3/LRP5/THY1/HHEX/LRP6/CTDSP2/PTPRB/DUSP6/SH2B3/LATS2/BDKRB2/SMAD6/NR2F2/GIT1/PIP4K2B/SOCS3/PKIG/RASIP1/PPM1F/ADARB1/SFRP2/SPRED1/PMEPA1/DUSP7/SAMSN1/YWHAG/AIDA/PPIA/PPARG/CDKN1C/SPRED2/DNAJC10/PKN1/ITGB1BP1/KIRREL1/CALM1/CTDSP1/PPP2R5A/AKT1/MLLT1/TNFAIP3/MIDN…	176
GO:0035967	BP	GO:0035967	cellular response to topologically incorrect protein	73/5405	120/18903	1.7268e-13	8.90754e-12	5.61883e-12	BOK/STC2/DAB2IP/CCND1/HSPB8/ATXN3/DNAJC10/TMTC4/HERPUD1/DNAJC18/NCK1/DERL3/ERMP1/MBTPS1/BAG6/UGGT2/BAG3/UFD1/COPS5/ATF6B/VAPB/EIF2S1/WFS1/EIF2AK2/BFAR/OS9/XBP1/AMFR/HSF1/PIGBOS1/TOR1A/DDRGK1/SERP1/BAX/VCP/ATF6/OPTN/RNF5/HSPA1B/HSPD1/AGR2/STUB1/HSPA8/DNAJB9/ERLEC1/AUP1/ERN1/EIF2AK3/TMBIM6/BCL2L11/ERN2/PTPN1/HSPA13/PPP1R15B/HSPA1A/CDK5RAP3/RHBDD2/HSPA6/ERO1A/NFE2L2/AKIRIN2/DDIT3/PTPN2/ATF3/HERPUD2/…	73
GO:1902107	BP	GO:1902107	positive regulation of leukocyte differentiation	100/5405	184/18903	1.75647e-13	8.91605e-12	5.6242e-12	PTPRC/SOX13/HLX/ITPKB/TGFBR2/RHOA/LEF1/SOX4/ZBTB16/ZMIZ1/KITLG/GAS6/MMP14/FES/ZBTB46/HMGB1/LGALS9/NEDD9/RHOH/KLF10/IL15RA/PNP/CD46/CTNNBIP1/PPP3CA/EVI2B/PRKDC/CD27/STAT5B/SOCS5/IL4R/BAD/IL2RG/FOS/SMARCA4/PHF10/SMARCE1/SMARCC2/ZFP36L1/RUNX3/EGR3/SMARCA2/SMARCD1/SMARCD2/ARID1B/TYROBP/IL15/RB1/ANXA1/HLA-DRA/BRD7/XBP1/HSF1/CREB1/ARID1A/SASH3/ACTL6A/IL7R/HCLS1/NCKAP1L/ADAM8/ZAP70/SOCS1/TNF/VSIR/SYK/CD…	100
GO:1903708	BP	GO:1903708	positive regulation of hemopoiesis	100/5405	184/18903	1.75647e-13	8.91605e-12	5.6242e-12	PTPRC/SOX13/HLX/ITPKB/TGFBR2/RHOA/LEF1/SOX4/ZBTB16/ZMIZ1/KITLG/GAS6/MMP14/FES/ZBTB46/HMGB1/LGALS9/NEDD9/RHOH/KLF10/IL15RA/PNP/CD46/CTNNBIP1/PPP3CA/EVI2B/PRKDC/CD27/STAT5B/SOCS5/IL4R/BAD/IL2RG/FOS/SMARCA4/PHF10/SMARCE1/SMARCC2/ZFP36L1/RUNX3/EGR3/SMARCA2/SMARCD1/SMARCD2/ARID1B/TYROBP/IL15/RB1/ANXA1/HLA-DRA/BRD7/XBP1/HSF1/CREB1/ARID1A/SASH3/ACTL6A/IL7R/HCLS1/NCKAP1L/ADAM8/ZAP70/SOCS1/TNF/VSIR/SYK/CD…	100
GO:0050871	BP	GO:0050871	positive regulation of B cell activation	88/5405	155/18903	1.76994e-13	8.91605e-12	5.6242e-12	PTPRC/MEF2C/CD81/MMP14/CD40/CD320/SLC39A10/STAT6/TLR4/CD27/STAT5B/BAD/GPR183/IL2RG/IGHA1/CD38/IL6/TNIP2/TRBC2/IGLL5/IGKC/XBP1/EXOSC6/IGHA2/SASH3/NCKAP1L/TRBC1/SYK/IGLC2/IGLC3/CD28/IGHG1/BTK/IRS2/BCL2/IGHM/IGHV3-30/CARD11/IGHV3-7/IGHV4-59/IGHV3-23/TBX21/IGHV3-11/IGHV4-61/IGHV4-39/IGHG3/CDKN1A/IGHV4-4/IGHG2/IGHV3-48/IGHV4-34/IL10/IGHV3-33/IGHV3-74/TRDC/TFRC/TNFSF13/IGHV3-72/IGHV1-3/IGHV3-43/IGHV3-1…	88
GO:0051017	BP	GO:0051017	actin filament bundle assembly	90/5405	160/18903	1.97679e-13	9.8809e-12	6.23283e-12	ASAP3/WASF2/S1PR1/RHOC/S100A10/ROCK2/TACR1/MYO1B/RHOA/FAM107A/PHLDB2/ADD1/LIMCH1/DPYSL3/SYNPO/MARCKS/EZR/FSCN1/RAC1/ELN/CALD1/PLS3/DLC1/DMTN/SORBS3/SFRP1/ABL1/AIF1L/SWAP70/ARRB1/RDX/FAM171A1/NRP1/PDLIM1/RAPGEF3/LIMA1/PXN/FERMT2/ACTN1/TJP1/CX3CL1/FHOD1/ARHGEF15/TNFAIP1/ACTG1/ID1/PPM1F/SHANK3/NEDD9/TPM1/LCP1/ITGB1BP1/STMN1/EPS8/FLNA/F11R/MET/SMAD3/SRF/WAS/ZYX/RGCC/SYNPO2/PPFIA1/GPR65/SORBS1/PLEK/MK…	90
GO:0097530	BP	GO:0097530	granulocyte migration	89/5405	158/18903	2.40594e-13	1.19335e-11	7.52759e-12	HRH1/ITGA9/EDN1/RAC1/CD99/PTK2/JAM3/THBS1/EMP2/MAPK3/CX3CL1/CCL2/CCL14/CCL23/PECAM1/PIP5K1C/RAC2/LBP/RHOH/PPIA/ITGA1/CD99L2/IL17RC/ITGB2/BSG/PPIB/IL1R1/CCL4/CCL5/C1QBP/SELENOK/PDE4B/PREX1/DNM1L/ANXA1/CCL3/WDR1/FCER1G/NCKAP1L/ADAM8/JAGN1/CCL21/SYK/CXCL11/PTGER4/JAML/IL1B/CD300A/TREM1/VAV1/RARRES2/CCL20/CCR7/CCL3L1/SLAMF1/CSF1R/S100A9/C3AR1/C5AR1/CXCL2/XCL2/PIK3CD/ADGRE2/MCOLN2/XCL1/IL1A/RIPOR2/S10…	89
GO:0071675	BP	GO:0071675	regulation of mononuclear cell migration	74/5405	123/18903	2.64784e-13	1.29422e-11	8.16385e-12	ABL2/RHOA/CD200/APOD/SERPINE1/WASL/MSN/PTK2/ABL1/PDGFD/CXCL12/ANO6/GAS6/THBS1/MAPK3/CORO1A/CRK/SPNS2/CCL2/PLCB1/MADCAM1/JAM2/APP/HMGB1/LGALS9/NEDD9/LRCH1/CD99L2/ADAM10/AKT1/CCL4/CCL5/C1QBP/SELENOK/ADAM17/CALR/ITGA4/WNK1/CCL3/SPI1/DOCK8/ADAM8/AIF1/CCL21/TNF/SPN/RARRES2/PTK2B/CCL20/CCR7/SLAMF1/CSF1R/C3AR1/C5AR1/CCR6/XCL2/XCL1/RIPOR2/CCR1/CD200R1/TNFSF14/LYN/PLA2G7/CXCL13/OXSR1/CXCL17/STK10/S100A14/…	74
GO:0035966	BP	GO:0035966	response to topologically incorrect protein	91/5405	163/18903	2.64945e-13	1.29422e-11	8.16385e-12	BOK/STC2/HSPB1/DAB2IP/CCND1/SERPINH1/HSPB8/THBS1/ATXN3/DNAJC10/HSP90AA1/TMTC4/CLU/HERPUD1/DNAJC18/NCK1/DERL3/ERMP1/MBTPS1/BAG6/UGGT2/BAG3/COMP/UFD1/DNAJB4/COPS5/ATF6B/VAPB/EIF2S1/WFS1/EIF2AK2/BFAR/OS9/XBP1/AMFR/HSF1/PIGBOS1/TOR1A/DDRGK1/SERP1/FAF2/BAX/VCP/ATF6/OPTN/RNF5/HSPA1B/HSPD1/DNAJB1/STT3B/UBE2J2/HSPE1/AGR2/STUB1/HSPA8/DNAJB9/ERLEC1/HSPH1/AUP1/UBXN4/TRAM1/ERN1/EIF2AK3/TMBIM6/BCL2L11/ERN2/PT…	91
GO:0050921	BP	GO:0050921	positive regulation of chemotaxis	83/5405	144/18903	2.75085e-13	1.33364e-11	8.41257e-12	S1PR1/BMPR2/KDR/VEGFC/ITGA2/EDN1/RAC1/HSPB1/SERPINE1/VEGFD/FGFR1/PTK2/SWAP70/PDGFD/NRP1/CXCL12/ANO6/GAS6/PGF/THBS1/MAPK3/CDH13/PPM1F/RAC2/PDGFB/LBP/HMGB1/LGALS9/NEDD9/CXCR4/MET/ZNF580/PRKD2/ADAM10/TPBG/SMAD3/MEGF8/PDGFRB/CCL4/CCL5/C1QBP/GPSM3/ADAM17/IL6/CALR/SMOC2/WNK1/DNM1L/CCL3/STX4/SPI1/NCKAP1L/AIF1/CCL21/PTN/IL16/RARRES2/PTK2B/CCR7/SLAMF1/CSF1R/C3AR1/C5AR1/CCR6/TREM2/XCL2/XCL1/RIPOR2/VEGFA/CX…	83
GO:0042542	BP	GO:0042542	response to hydrogen peroxide	77/5405	130/18903	2.78817e-13	1.34165e-11	8.46307e-12	PINK1/RHOB/STK25/EDN1/AQP1/PPP2CB/ABL1/IL18BP/PDGFD/PLEKHA1/PDE8A/MMP2/NQO1/CRK/PCGF2/MAP1LC3A/CYP1B1/NET1/SPHK1/STAT6/MET/ZNF580/KLF2/TNFAIP3/PDGFRB/FOXP1/CAPN2/HDAC2/BAD/PRKAA1/BECN1/AREG/HP/IL6/PARK7/TRAP1/TXN/PRDX3/IMPACT/ADAM9/APEX1/ANXA1/NR4A3/SETX/CAT/HSF1/SDC1/SIGMAR1/PDCD10/DDR2/RELA/TXNIP/HBB/CRYAB/COL1A1/PTK2B/FYN/PRKCD/PPIF/BCL2/STK26/ERN1/SOD2/IL10/TRPA1/FABP1/MAPK13/PPP1R15B/NFE2L2/…	77
GO:0097193	BP	GO:0097193	intrinsic apoptotic signaling pathway	144/5405	298/18903	3.28275e-13	1.56794e-11	9.89048e-12	EPHA2/PINK1/ACKR3/STK25/BOK/SHISA5/MSX1/HSPB1/FIS1/CAV1/TNFRSF10B/MYC/DAB2IP/ABL1/NACC2/CD44/TMEM109/CXCL12/TNFRSF1A/YBX3/BDKRB2/PPP1R13B/PML/SNAI1/PPM1F/PTTG1IP/SFRP2/IFI16/CYP1B1/SNAI2/BCAP31/PPIA/HIF1A/DNAJC10/SERINC3/HDAC1/AKT1/CLU/FNIP2/HRAS/PRKDC/HERPUD1/PHLDA3/TP53/NCK1/BAD/TXNDC12/BECN1/BAG6/MYBBP1A/SLC9A3R1/SELENOK/TRIAP1/ARHGEF2/PARK7/TRAP1/GRINA/PDK2/BCL2L2/IFI6/BAG5/WFS1/PTPMT1/LCK/KD…	144
GO:0050729	BP	GO:0050729	positive regulation of inflammatory response	87/5405	154/18903	3.5596e-13	1.68767e-11	1.06457e-11	HYAL2/MGST2/OSMR/ITGA2/IL6ST/SERPINE1/FABP4/IL33/CD81/PDE2A/ETS1/TNFRSF1A/C2CD4B/GPRC5B/CX3CL1/GRN/ACE/LDLR/GPR4/APP/LBP/VAMP8/TLR4/ALOX5AP/LGALS1/STAT5B/NLRP1/CLOCK/SNCA/HLA-E/GPSM3/PLA2G2A/IL6/NKG7/PARK7/NMI/IL15/CCL3/DHX9/ZBP1/SNX4/ADAM8/TNF/LPL/DDT/PTGER4/IL1B/IL16/IL18/CD28/CCR7/BTK/IFNG/S100A9/RPS19/STAP1/OSM/FCGR1A/TREM2/NLRP3/TLR2/LILRA5/S100A8/PIK3CG/IL23A/AIM2/LGALS2/NINJ1/C3/LTA/NUPR1/…	87
GO:0050673	BP	GO:0050673	epithelial cell proliferation	211/5405	481/18903	3.61154e-13	1.6998e-11	1.07222e-11	EPHA2/TIE1/TGFBR3/LAMC1/CD34/HLX/AKT3/RTN4/TACR1/ATOH8/LIMS2/FAP/BMPR2/NRP2/IGFBP5/CTNNB1/HYAL1/ROBO1/GATA2/HES1/KDR/VEGFC/DAB2/MEF2C/SPARC/FLT4/CD109/PTPRK/BMPER/IGFBP3/LAMB1/CAV2/CAV1/VEGFD/APLN/LOXL2/FGFR1/SFRP1/MYC/NFIB/TEK/KLF9/DAB2IP/NOTCH1/EGFL7/APLNR/CCND1/JCAD/ZEB1/NRP1/CXCL12/MMRN2/NKX2-3/TCF7L2/HTRA1/ACVRL1/FLT1/EFNB2/MMP14/SAV1/PGF/VASH1/THBS1/DLL4/NR2F2/CDH13/CYBA/CCL2/IGFBP4/GRN/NME…	211
GO:0034612	BP	GO:0034612	response to tumor necrosis factor	127/5405	254/18903	3.79849e-13	1.77483e-11	1.11956e-11	SELE/HYAL1/HYAL2/HES1/EDN1/PPP2CB/SFRP1/FABP4/DAB2IP/ASS1/IL18BP/CCDC3/TNFRSF1A/YBX3/GAS6/THBS1/ADAMTS7/MAPK3/CX3CL1/CYBA/CCL2/CCL14/CCL23/KAT2A/CD40/PLVAP/ACTN4/CARD8/AKAP12/CYP1B1/EXT1/TRAF3IP2/NKIRAS2/ILK/RRAGA/SPHK1/KLF2/ADAM10/AKT1/TNFAIP3/GBP1/BIRC3/PIAS3/CCL4/FOXP1/TP53/LAPTM5/FOS/CCL5/TXNDC17/NFATC1/ADAM17/ARHGEF2/ZFP36L1/CARD16/TNFRSF17/MAPK14/VCAM1/ADAM9/SHARPIN/TNFRSF18/CCL3/PRPF8/INPP…	127
GO:0033627	BP	GO:0033627	cell adhesion mediated by integrin	58/5405	88/18903	3.85813e-13	1.78973e-11	1.12895e-11	EPHA2/PLPP3/ITGA10/EFNA1/ITGA6/ITGAV/ITGA9/MMRN1/ITGA2/SERPINE1/PODXL/PTK2/SWAP70/JAM3/ITGB1/PLAU/ITGA5/FBN1/PIEZO1/CRK/ITGB4/SFRP2/CYP1B1/SNAI2/EXT1/ITGB1BP1/ICAM1/ITGA1/CD3E/ITGB2/PTPN11/CCL5/ADAM17/LPXN/ITGA3/ITGB7/ITGA4/WNK1/ADAM9/SKAP1/FERMT3/ITGA8/ITGB5/NCKAP1L/PTPN6/CCL21/ITGAL/SYK/PDE3B/ITGAX/PIK3CG/MUC1/FERMT1/LYN/CXCL13/CIB1/ITGAM/EMILIN1	58
GO:0010634	BP	GO:0010634	positive regulation of epithelial cell migration	96/5405	176/18903	3.97789e-13	1.81911e-11	1.14749e-11	PLPP3/AKT3/ROCK2/RHOB/PRKCE/RTN4/TACR1/ATOH8/MAP4K4/BMPR2/NRP2/IQSEC1/TGFBR2/HYAL1/GATA2/KDR/VEGFC/ITGA2/PLK2/HBEGF/SPARC/FLT4/EDN1/SASH1/RAC1/HSPB1/NOS3/ADGRA2/FGFR1/ENPP2/PTK2/TEK/ABL1/PIK3C2A/ETS1/JCAD/NRP1/DOCK1/HDAC7/RHOJ/THBS1/RAB11A/BCAR1/GRN/MAP3K3/RIN2/PLCG1/CD40/FUT1/RRAS/PPM1F/PDGFB/HMGB1/SCARB1/HIF1A/ITGB1BP1/MET/ZNF580/PRKD2/AKT1/PDCD6/FOXP1/ADAM17/CALR/ITGA3/SMOC2/SP1/CTSH/ADAM9/SRP…	96
GO:1902905	BP	GO:1902905	positive regulation of supramolecular fiber organization	96/5405	176/18903	3.97789e-13	1.81911e-11	1.14749e-11	WASF2/RHOC/S100A10/ROCK2/PRKCE/TACR1/NCKAP1/RHOA/LIMCH1/MAP1B/SYNPO/EDN1/TNXB/RAC1/WASL/SORBS3/SFRP1/GSN/ABL1/SWAP70/ARL2/CDC42EP2/CTTN/NRP1/RAPGEF3/PXN/FERMT2/CYFIP1/FES/CX3CL1/FHOD1/ARHGEF15/GIT1/CSF3/CDC42EP4/DSTN/ID1/COLGALT1/CDC42EP5/PPM1F/CDC42EP1/APP/DCTN1/TPM1/ITGB1BP1/KIRREL1/BRK1/EFEMP2/MET/NUMA1/SMAD3/CLU/WAS/NCK1/ABI2/RGCC/SYNPO2/CDC42EP3/CFL2/GPR65/PLEK/RB1/MTOR/WDR1/BAIAP2/MTSS1/NCK…	96
GO:0061572	BP	GO:0061572	actin filament bundle organization	91/5405	164/18903	4.29058e-13	1.94829e-11	1.22897e-11	ASAP3/WASF2/S1PR1/RHOC/S100A10/ROCK2/TACR1/MYO1B/RHOA/FAM107A/PHLDB2/ADD1/LIMCH1/DPYSL3/SYNPO/MARCKS/EZR/FSCN1/RAC1/ELN/CALD1/PLS3/DLC1/DMTN/SORBS3/SFRP1/ABL1/AIF1L/SWAP70/ARRB1/RDX/FAM171A1/NRP1/PDLIM1/RAPGEF3/LIMA1/PXN/FERMT2/ACTN1/TJP1/CX3CL1/FHOD1/RFLNB/ARHGEF15/TNFAIP1/ACTG1/ID1/PPM1F/SHANK3/NEDD9/TPM1/LCP1/ITGB1BP1/STMN1/EPS8/FLNA/F11R/MET/SMAD3/SRF/WAS/ZYX/RGCC/SYNPO2/PPFIA1/GPR65/SORBS1/P…	91
GO:0046632	BP	GO:0046632	alpha-beta T cell differentiation	71/5405	117/18903	4.39392e-13	1.98126e-11	1.24977e-11	HLX/ITPKB/TGFBR2/RHOA/LEF1/CTSL/ABL1/ZBTB16/NKX2-3/HMGB1/LGALS9/PNP/STAT6/FOXP1/RC3H2/SOCS5/IL4R/GPR183/IL2RG/IL6/STAT3/RUNX3/ARMC5/RPL22/IRF4/ANXA1/MTOR/HLA-DRA/SASH3/LY9/NCKAP1L/ZAP70/SOCS1/SYK/ITK/PTGER4/SPN/CD86/BATF/IL18/CD83/GATA3/TOX/LILRB4/IFNG/IL12RB1/BCL11B/NFKBID/BCL2/NLRP3/SLAMF6/GPR18/ZNF683/TBX21/EOMES/TNFSF8/IL23A/FOXP3/RELB/IRF1/PRDM1/RUNX1/IL6R/PRR7/ZC3H12A/IL18R1/RIPK2/BRAF/MALT…	71
GO:0042102	BP	GO:0042102	positive regulation of T cell proliferation	66/5405	106/18903	5.2543e-13	2.35276e-11	1.48411e-11	PTPRC/IGFBP2/TGFBR2/HES1/IL6ST/EFNB1/CD81/KITLG/CD276/CORO1A/HMGB1/LGALS9/PNP/CD46/PPP3CA/CD3E/NCK1/STAT5B/CCL5/HLA-E/SELENOK/IL6/VCAM1/IL15/ANXA1/PTPN22/SASH3/NCKAP1L/ZAP70/CD6/AIF1/SYK/CD86/IL1B/HLA-DPA1/DHPS/IL18/HAVCR2/CD28/SLAMF1/CD70/LILRB2/TNFSF9/IL12RB1/HLA-DPB1/IL2RA/XCL1/IL1A/CARD11/CD24/TMIGD2/PRKCQ/IL23A/FOXP3/HLA-DMB/TFRC/CCDC88B/EBI3/CD40LG/RASAL3/CD55/TNFSF13B/IGF1/RIPK2/PYCARD/IL2…	66
GO:0050821	BP	GO:0050821	protein stabilization	111/5405	214/18903	5.34996e-13	2.37907e-11	1.50071e-11	PINK1/PLPP3/EFNA1/RTN4/EPHA4/CRTAP/MSX1/SOX4/FLOT1/HIP1/SOX17/GPIHBP1/GNAQ/STXBP1/PARVA/CTNND1/SAV1/TMEM88/GRN/CDC37/STK3/P3H1/PIM2/WIZ/HIP1R/RUVBL1/NLK/FLNA/HSP90AA1/PFDN1/SMAD3/LAMP1/CLU/PPIB/TRIM44/STX12/FLOT2/TP53/PER3/PFDN4/USP13/ZSWIM7/HCFC1/BAG6/PFDN2/STK4/BAG3/TELO2/CALR/PARK7/TNIP2/POLR2E/ATP1B3/CCT7/BAG5/WFS1/TAF1/PTEN/TYROBP/SUMO1/MTMR9/RUVBL2/CCT5/PIN1/GOLGA7/CCT2/USP9X/CREB1/CHP1/CCT…	111
GO:0007044	BP	GO:0007044	cell-substrate junction assembly	61/5405	95/18903	5.49471e-13	2.42671e-11	1.53076e-11	MACF1/S100A10/LAMC1/ROCK2/MAP4K4/ITGA6/RHOA/FAM107A/PHLDB2/APOD/LIMCH1/KDR/ITGA2/PTPRK/RAC1/DLC1/DMTN/SFRP1/PTK2/PLEC/TEK/ABL1/CTTN/THY1/NRP1/VCL/ACVRL1/ITGA5/THSD1/ARHGEF7/MMP14/FERMT2/ACTN1/THBS1/PEAK1/TAOK2/ITGB4/ACTG1/DAPK3/PPM1F/BCR/DST/SLK/ITGB1BP1/RCC2/STON1/SMAD3/DUSP3/PTPRA/SORBS1/TLN1/PTEN/DUSP22/CORO1C/LIMS1/POLDIP2/PTK2B/BCL2/VEGFA/SDC4/PTPRJ	61
GO:0070665	BP	GO:0070665	positive regulation of leukocyte proliferation	92/5405	167/18903	5.63622e-13	2.47227e-11	1.55949e-11	PTPRC/TACR1/IGFBP2/TGFBR2/HES1/IL6ST/MEF2C/EFNB1/PTK2/CD81/KITLG/CD276/MAPK3/CORO1A/CD40/CD320/RAC2/HMGB1/LGALS9/SLC39A10/PNP/TLR4/CD46/PPP3CA/CD3E/NCK1/STAT5B/GPR183/CCL5/HLA-E/CD38/SELENOK/IL6/BST2/VCAM1/IL15/ANXA1/PTPN22/BCL2L1/SASH3/NCKAP1L/ZAP70/CD6/AIF1/SYK/CSF2RB/CD86/IL1B/HLA-DPA1/DHPS/FCGR3A/IL18/HAVCR2/CD28/BTK/SLAMF1/CSF1R/CD70/LILRB2/TNFSF9/IL12RB1/IRS2/HLA-DPB1/BCL2/IL2RA/XCL1/IL1A/C…	92
GO:0071222	BP	GO:0071222	cellular response to lipopolysaccharide	114/5405	222/18903	6.26403e-13	2.72908e-11	1.72149e-11	PRKCE/RHOA/PLSCR4/MEF2C/SASH1/CD36/SERPINE1/NOS3/DAB2IP/ASS1/ABL1/VIM/EFNB2/MAPK3/CX3CL1/PLSCR3/GIT1/CCL2/CSF3/TBXA2R/CARD8/BCR/LBP/HMGB1/EDNRB/LDOC1/CHMP5/TSPO/SCARB1/TLR4/SBNO2/AKT1/TNFAIP3/SLC7A5/TRIM5/SIGIRR/CAPN2/PABPN1/CCL5/IL6/HADHB/PDE4B/TNIP2/CDK4/CARD16/UPF1/MAPK14/PRDX2/ADAM9/CCL3/PTPN22/PRPF8/XBP1/HSF1/SPI1/NR1D1/CD6/BCL10/MTDH/TNF/RELA/CXCL11/CD86/IL1B/LILRB1/LY96/IL18/HAVCR2/PTAFR/T…	114
GO:0006956	BP	GO:0006956	complement activation	77/5405	132/18903	8.44136e-13	3.65301e-11	2.3043e-11	FCN3/CFH/CFI/C7/CD59/SERPING1/A2M/CD46/CLU/IGHA1/C1QBP/RGCC/C1R/TRBC2/C1RL/IGLL5/IGKC/IGHA2/COLEC11/TRBC1/C1S/IGLC2/IGLC3/IL1B/IGHG1/C1QA/C1QB/C1QC/VSIG4/TREM2/CFB/IGHM/FCN1/IGHV3-30/IGHV3-7/IGHV4-59/IGHV3-23/IGHV3-11/IGHV4-61/IGHV4-39/IGHG3/IGHV4-4/IGHG2/IGHV3-48/MFAP4/IGHV4-34/IGHV3-33/IGHV3-74/TRDC/IGHV3-72/IGHV1-3/IGHV3-43/C3/IGHV3-15/IGHV1-24/IGHV3-21/IGHV4-31/IGHV1-69D/IGHG4/IGHV4-28/IGHV3-…	77
GO:1903829	BP	GO:1903829	positive regulation of protein localization	199/5405	451/18903	8.7514e-13	3.76193e-11	2.37301e-11	C1QTNF12/EPHA2/PINK1/LEPROT/WLS/OAZ3/ROCK2/PRKCE/SPTBN1/RTN4/MYRIP/HYAL2/WWTR1/VEGFC/ABLIM3/SOX4/TMEM30A/EZR/RAMP3/GNAI1/FIS1/MSN/SYTL4/PTP4A3/STOM/LRRC8A/CD81/RDX/FRMD4A/ITGB1/TCF7L2/CLSTN3/RAPGEF3/GAS6/FERMT2/OAZ2/RIPOR1/DOC2B/RPH3AL/YWHAE/MYO1C/MYH10/JUP/PPP1R9B/PECAM1/ABHD17A/ZDHHC8/RAC2/CARD10/NEDD9/NLGN2/ATP13A2/PRKACA/BCAP31/ATP2B4/C1QTNF3/PPIA/HIF1A/PPARG/CNPY4/PRKCH/ITGB1BP1/EPB41L2/TRPM…	199
GO:0007249	BP	GO:0007249	I-kappaB kinase/NF-kappaB signaling	139/5405	288/18903	9.45406e-13	4.03707e-11	2.54657e-11	PLEKHG5/PINK1/WLS/RHOC/S100A13/ROCK2/PRKCE/CTNNB1/SHISA5/RHOA/TNFSF10/PLK2/F2R/EDN1/GJA1/NOD1/HSPB1/CD36/TSPAN6/AVPR2/TNFRSF10B/DAB2IP/ABL1/TNFRSF1A/LTBR/HACD3/GPRC5B/CX3CL1/TBKBP1/MAP3K3/FKBP1A/CD40/SLC44A2/CARD8/LGALS9/EDNRB/PIM2/RHOH/TRAF3IP2/NKIRAS2/APOL3/HDAC1/TLR4/FLNA/ERC1/PPP5C/LAMTOR5/AKT1/TNFAIP3/TRIM8/BIRC3/ZMYND11/TRIM5/DDX1/LGALS1/JMJD8/S100A4/ANKRD17/MAVS/CARD19/ZDHHC13/TNIP2/TRIM25…	139
GO:0045621	BP	GO:0045621	positive regulation of lymphocyte differentiation	76/5405	130/18903	1.01483e-12	4.30502e-11	2.71559e-11	PTPRC/SOX13/HLX/ITPKB/TGFBR2/RHOA/LEF1/SOX4/ZBTB16/ZMIZ1/GAS6/MMP14/LGALS9/RHOH/IL15RA/PNP/CD46/PRKDC/CD27/STAT5B/SOCS5/IL4R/BAD/IL2RG/SMARCA4/PHF10/SMARCE1/SMARCC2/RUNX3/EGR3/SMARCA2/SMARCD1/SMARCD2/ARID1B/IL15/ANXA1/HLA-DRA/BRD7/XBP1/ARID1A/SASH3/ACTL6A/IL7R/NCKAP1L/ADAM8/ZAP70/SOCS1/VSIR/SYK/CD86/IL18/CD83/GATA3/BTK/TOX/LILRB4/IFNG/LILRB2/TNFSF9/IL12RB1/RASGRP1/NFKBID/NLRP3/IL2RA/DUSP10/IL4I1/…	76
GO:0072594	BP	GO:0072594	establishment of protein localization to organelle	198/5405	449/18903	1.0687e-12	4.50389e-11	2.84103e-11	PINK1/LEPROT/LMNA/HYAL2/APOD/IPO11/ABLIM3/GRPEL2/NEURL1B/CD36/FIS1/NOTCH1/SRP14/NEDD4/RAB11A/PML/JUP/PKIG/MVB12A/RAC2/PTTG1IP/STK3/TSPO/BCAP31/PRICKLE1/TRAF3IP2/HK1/TIMM13/FLNA/SEC62/MTX2/PPP3CA/APPL1/HSP90AA1/RALA/SCARB2/TNPO1/AKT1/SMAD3/TNFAIP3/SAE1/LAMP1/IL10RA/CLU/TIMM8B/ROMO1/RHOU/SH3GLB1/PEX5/GSK3A/HERPUD1/IPO9/TP53/LAPTM5/PDCD5/NUTF2/TOMM5/TSC2/TARDBP/PRKAA1/SAMM50/BECN1/TRIM28/IPO5/BAG6/C…	198
GO:0071356	BP	GO:0071356	cellular response to tumor necrosis factor	118/5405	234/18903	1.23174e-12	5.15729e-11	3.2532e-11	HYAL1/HYAL2/HES1/EDN1/PPP2CB/SFRP1/FABP4/DAB2IP/ASS1/IL18BP/CCDC3/TNFRSF1A/YBX3/GAS6/THBS1/ADAMTS7/MAPK3/CX3CL1/CYBA/CCL2/CCL14/CCL23/KAT2A/CD40/PLVAP/ACTN4/CARD8/AKAP12/CYP1B1/EXT1/TRAF3IP2/NKIRAS2/ILK/RRAGA/SPHK1/KLF2/AKT1/TNFAIP3/GBP1/BIRC3/PIAS3/CCL4/FOXP1/TP53/LAPTM5/FOS/CCL5/TXNDC17/NFATC1/ADAM17/ARHGEF2/ZFP36L1/CARD16/TNFRSF17/MAPK14/VCAM1/SHARPIN/TNFRSF18/CCL3/PRPF8/INPP5K/DHX9/ZFP36L2/NR…	118
GO:0032535	BP	GO:0032535	regulation of cellular component size	168/5405	367/18903	1.31919e-12	5.48783e-11	3.4617e-11	MACF1/SEMA6C/AKT3/PRKCE/SPTBN1/RTN4/TMSB10/CHMP3/SEMA4C/NCKAP1/BMPR2/RHOA/SEMA3F/SEMA3G/ADD1/SLC12A7/MAP1B/SEMA6A/DBN1/EDN1/EZR/RAC1/AQP1/ELN/MSN/DMTN/DPYSL2/GSN/SPTAN1/LRRC8A/ABL1/OLFM1/SWAP70/CDC42EP2/CTTN/PICALM/RDX/ESAM/SVIL/NRP1/CXCL12/ANO6/LIMA1/RARG/CYFIP1/SPTBN5/TMOD2/TMOD3/RAB11A/CORO1A/CSF3/CDC42EP4/DSTN/SEMA6B/KANK3/CDC42EP5/CDC42EP1/TRIOBP/SHANK3/DISC1/ATP13A2/AP2M1/SSH1/SPART/HIP1R/E…	168
GO:0043122	BP	GO:0043122	regulation of I-kappaB kinase/NF-kappaB signaling	126/5405	255/18903	1.37349e-12	5.64812e-11	3.56281e-11	PLEKHG5/PINK1/WLS/RHOC/S100A13/PRKCE/CTNNB1/SHISA5/RHOA/TNFSF10/PLK2/F2R/GJA1/NOD1/HSPB1/CD36/TSPAN6/TNFRSF10B/DAB2IP/ABL1/TNFRSF1A/LTBR/GPRC5B/CX3CL1/MAP3K3/FKBP1A/CD40/SLC44A2/CARD8/LGALS9/PIM2/RHOH/TRAF3IP2/NKIRAS2/APOL3/HDAC1/TLR4/FLNA/PPP5C/LAMTOR5/TNFAIP3/TRIM8/BIRC3/ZMYND11/TRIM5/DDX1/LGALS1/JMJD8/S100A4/ANKRD17/MAVS/CARD19/ZDHHC13/TNIP2/TRIM25/TMEM101/CARD16/DHX15/LIME1/BST2/SHARPIN/ATP2C…	126
GO:0043161	BP	GO:0043161	proteasome-mediated ubiquitin-dependent protein catabolic process	198/5405	450/18903	1.37524e-12	5.64812e-11	3.56281e-11	RNF144A/SH3RF3/HECW2/CTNNB1/WWTR1/FBXL7/DAB2/CAV1/PPP2CB/IL33/ARRB1/KCTD10/PSMB5/IFI27/HERC2/NEDD4/PML/FBXO31/TNFAIP1/SMURF2/AGAP3/CSNK1E/UBXN8/BCAP31/PRICKLE1/ATXN3/DNAJC10/ERLIN1/PCBP2/ZYG11B/TRIM2/AKT1/GIPC1/CLU/ELOB/CDC27/UBE2G2/GSK3A/ANAPC13/HERPUD1/PSMD10/SPOP/KLHL42/APC/DNAJC18/CLOCK/GNA12/DERL3/ANAPC11/KLHL20/SOCS5/CANX/RNF217/RBX1/KLHDC10/PSMA4/PSMD1/CDK2/CRBN/PSMB2/PSMA7/TRIM3/BAG6/MTA1…	198
GO:0002455	BP	GO:0002455	humoral immune response mediated by circulating immunoglobulin	71/5405	119/18903	1.42285e-12	5.80667e-11	3.66282e-11	PTPRC/CFI/C7/CD81/SERPING1/CD46/CLU/IGHA1/C1QBP/C1R/TRBC2/C1RL/IGLL5/IGKC/FCGR2B/IGHA2/TRBC1/PTPN6/TNF/C1S/IGLC2/IGLC3/IGHG1/C1QA/C1QB/C1QC/TREM2/IGHM/IGHV3-30/IGHV3-7/IGHV4-59/IGHV3-23/IGHV3-11/IGHV4-61/IGHV4-39/IGHG3/IGHV4-4/IGHG2/IGHV3-48/IGHV4-34/IGHV3-33/IGHV3-74/TRDC/IGHV3-72/IGHV1-3/IGHV3-43/C3/IGHV3-15/IGHV1-24/IGHV3-21/LTA/IGHV4-31/IGHV1-69D/IGHG4/IGHV4-28/IGHV3-20/IGHV3-53/CD55/IGHV1-18…	71
GO:0052548	BP	GO:0052548	regulation of endopeptidase activity	190/5405	428/18903	1.47848e-12	5.96359e-11	3.76181e-11	EFNA1/ROCK2/CRIM1/TFPI/EPHA4/BOK/RHOA/ROBO1/PROS1/LXN/TNFSF10/F2R/SERPINB6/CD109/NOD1/AQP1/HIP1/SERPINE1/FIS1/BEX3/SOX7/DLC1/ASPH/MYC/KLF4/GSN/CD44/SERPING1/SERPINH1/PICALM/APLP2/ITIH5/MGMT/A2M/GAS6/SERPINA3/THBS1/ANXA2/UACA/PML/TIMP2/CST3/CARD8/PPM1F/TIMP3/APP/SFRP2/IFI16/HMGB1/LGALS9/ATP13A2/BCAP31/PPARG/TIMP1/HIP1R/HDAC1/CSTB/MTCH1/LAMTOR5/FURIN/AKT1/SMAD3/BIRC3/NGFR/PDCD6/RPS6KA3/LAPTM5/CST7/…	190
GO:0010950	BP	GO:0010950	positive regulation of endopeptidase activity	94/5405	174/18903	1.4798e-12	5.96359e-11	3.76181e-11	EFNA1/ROCK2/EPHA4/BOK/RHOA/ROBO1/TNFSF10/F2R/NOD1/HIP1/FIS1/BEX3/SOX7/DLC1/ASPH/MYC/GSN/PICALM/UACA/PML/CARD8/PPM1F/SFRP2/IFI16/HMGB1/LGALS9/BCAP31/PPARG/HIP1R/MTCH1/SMAD3/NGFR/PDCD6/LAPTM5/NLRP1/PDCD5/BAD/SNCA/STAT3/DAP/CTSH/LCK/HTRA2/APH1A/CASP10/HSF1/NCSTN/BAX/VCP/MBP/PSME3/PRELID1/BCL10/TNF/CYFIP2/NDUFA13/VSIR/SYK/HSPD1/HSPE1/PMAIP1/PSENEN/FYN/S100A9/ADRM1/RPS27L/ATP2A3/CTSD/CYCS/P2RX1/PERP/N…	94
GO:0045732	BP	GO:0045732	positive regulation of protein catabolic process	108/5405	209/18903	1.50182e-12	6.01474e-11	3.79407e-11	OAZ3/RNF144A/SH3RF3/VGLL4/SH3D19/DAB2/PLK2/ECSCR/EZR/CAV1/ASB9/MSN/SOX17/IL33/DAB2IP/CD81/RDX/NEDD4/OAZ2/LDLR/CSNK1E/BCAP31/PRICKLE1/EGLN2/ATXN3/ZYG11B/HSP90AA1/FURIN/AKT1/TNFAIP3/CLU/ELOB/SNX33/GSK3A/HERPUD1/PSMD10/FOXO1/APC/USP13/SOCS5/RNF217/RBX1/TNFSF12/OAZ1/BAG6/KEAP1/VPS28/CSNK1A1/SUMO2/TMEM259/PSMC5/HECTD1/SNX1/TMTC3/RILP/DDB1/RAD23A/TAF1/ADAM9/SUMO1/CUL4B/USP5/VPS35/CSNK2A1/RNF40/PSMC3/RH…	108
GO:0071560	BP	GO:0071560	cellular response to transforming growth factor beta stimulus	132/5405	271/18903	1.52818e-12	6.08254e-11	3.83684e-11	TGFBR3/TGFBR2/CLEC3B/HYAL2/SPRY1/SMAD1/DAB2/MEF2C/NREP/SMAD5/EDN1/CD109/PTPRK/CAV2/CAV1/SFRP1/PTK2/ENG/ABL1/ADAMTSL2/LTBP3/PDE2A/LRRC32/PDGFD/ZEB1/ZMIZ1/HTRA1/ACVRL1/PXN/LATS2/SMAD9/COL4A2/FERMT2/THBS1/FBN1/SMAD6/PML/TGFB1I1/CDH5/CRK/SMURF2/YES1/FKBP1A/ID1/CLDN5/LTBP1/CILP/SPRED1/PMEPA1/PPARG/CDKN1C/SPRED2/HDAC1/SKI/NLK/HTRA3/APPL1/IGF1R/FURIN/SMAD3/GIPC1/TP53/SMAD2/TWSG1/GLG1/PDCD5/HDAC2/ZFYVE9/…	132
GO:0001933	BP	GO:0001933	negative regulation of protein phosphorylation	157/5405	338/18903	1.69814e-12	6.71756e-11	4.23741e-11	PLPP3/PTPRC/SH3BP5/HYAL2/HEG1/WWTR1/SPRY1/SPRY4/CD109/CNKSR3/PRKAR1B/IGFBP3/HSPB1/CAV1/DMTN/SFRP1/FABP4/PLEC/GNAQ/DAB2IP/ENG/ABL1/HIPK3/LRP5/THY1/HHEX/LRP6/CTDSP2/PTPRB/DUSP6/SH2B3/LATS2/BDKRB2/SMAD6/NR2F2/SOCS3/PKIG/RASIP1/PPM1F/ADARB1/SFRP2/SPRED1/PMEPA1/DUSP7/SAMSN1/YWHAG/AIDA/PPIA/PPARG/CDKN1C/SPRED2/DNAJC10/PKN1/ITGB1BP1/KIRREL1/CALM1/CTDSP1/AKT1/MLLT1/TNFAIP3/PRKDC/EIF4G1/APC/NCK1/RGS2/SOCS…	157
GO:0071677	BP	GO:0071677	positive regulation of mononuclear cell migration	50/5405	73/18903	1.74622e-12	6.86561e-11	4.3308e-11	ABL2/RHOA/SERPINE1/ABL1/PDGFD/CXCL12/ANO6/GAS6/CORO1A/MADCAM1/JAM2/APP/HMGB1/LGALS9/NEDD9/CD99L2/ADAM10/CCL4/CCL5/C1QBP/SELENOK/ADAM17/CALR/ITGA4/WNK1/CCL3/SPI1/DOCK8/ADAM8/AIF1/CCL21/TNF/SPN/PTK2B/CCL20/CCR7/SLAMF1/CCR6/XCL2/XCL1/CCR1/TNFSF14/PLA2G7/CXCL13/OXSR1/CXCL17/S100A14/TNFRSF14/PYCARD/CD47	50
GO:0002699	BP	GO:0002699	positive regulation of immune effector process	128/5405	261/18903	1.80279e-12	7.04507e-11	4.444e-11	FCN3/PTPRC/HLX/GATA2/NOD1/CD36/IL33/STXBP1/CD81/FES/GPRC5B/CD40/PVR/NECTIN2/RAC2/LBP/LGALS9/VAMP8/HK1/STAT6/TLR4/CD46/TAP2/ITGB2/LAMP1/MZB1/IL1R1/SLC7A5/DDX1/LAPTM5/STAT5B/SOCS5/IL4R/HLA-E/ANKRD17/MAVS/IL6/STXBP2/TYROBP/ANXA1/NR4A3/HLA-DRA/PTPN22/STX4/MYO18A/XBP1/EXOSC6/SPI1/SASH3/SNX4/COLEC11/PHB2/PTPN6/BCL10/TNF/DDX21/SYK/HSPD1/CD86/IL1B/CD300A/LILRB1/VAV1/IL18/KLRD1/CD84/SH2D1A/CD28/PTAFR/GATA…	128
GO:0045058	BP	GO:0045058	T cell selection	39/5405	51/18903	1.82735e-12	7.09804e-11	4.47741e-11	PTPRC/ITPKB/RHOA/CTSL/JAG2/STAT6/CD3E/SRF/CD3D/IL6/STAT3/IRF4/IL15/MTOR/STK11/CD3G/LY9/DOCK2/ZAP70/SYK/SPN/BATF/CD28/GATA3/CD4/CCR7/TOX/IL12RB1/BCL11B/THEMIS/BCL2/SLAMF6/CARD11/TBX21/IL23A/FOXP3/IL6R/PTPN2/BRAF	39
GO:0072659	BP	GO:0072659	protein localization to plasma membrane	137/5405	285/18903	2.00217e-12	7.73055e-11	4.8764e-11	VAMP3/EPHA2/MACF1/S100A10/RAB13/ROCK2/PRKCE/SPTBN1/VAMP5/DAB2/RAB3C/FCHO2/KIF13A/FLOT1/EZR/AFDN/RAMP3/STXBP1/CD81/DCHS1/PICALM/RDX/ITGB1/TSPAN15/TSPAN14/TNFRSF1A/LRP6/GAS6/MMP14/EHD4/RAB11A/SLC9A3R2/EMP2/TMEM88/JUP/RAMP2/PPP1R9B/MYL12A/LAMA5/PALM/EHD2/ZDHHC8/PACS2/RAP2A/ZDHHC3/EPB41L3/AP2M1/RILPL1/ATP2B4/CNPY4/VAMP8/PRKCH/ABI3/TTC7B/ITGB1BP1/FLNA/F11R/APPL1/PPP2R5A/ARFRP1/TPBG/AKT1/NUMB/FYB1/FRMD…	137
GO:0042776	BP	GO:0042776	proton motive force-driven mitochondrial ATP synthesis	47/5405	67/18903	2.07736e-12	7.9731e-11	5.02939e-11	NDUFC1/NDUFA8/NDUFA12/ATP5PF/NDUFB2/ATP5F1E/NDUFB1/ATP5F1C/NDUFC2/NDUFB6/NDUFS2/NDUFS4/NDUFA11/ATP5ME/NDUFB3/NDUFB4/ATP5PD/ATP5PO/NDUFAB1/SDHD/NDUFS6/NDUFB10/NDUFA10/SDHC/NDUFB7/NDUFB5/NDUFB8/NDUFA1/NDUFA7/NDUFS8/NDUFB9/NDUFS5/NDUFS3/NDUFA3/STOML2/NDUFA2/NDUFA13/NDUFA6/NDUFA9/ATP5F1B/ATP5PB/ATP5F1D/NDUFV3/NDUFS7/ATP5MF/ATP5F1A/ATP5MG	47
GO:0006958	BP	GO:0006958	complement activation, classical pathway	65/5405	106/18903	2.15821e-12	8.23439e-11	5.19422e-11	CFI/C7/SERPING1/CD46/CLU/IGHA1/C1QBP/C1R/TRBC2/C1RL/IGLL5/IGKC/IGHA2/TRBC1/C1S/IGLC2/IGLC3/IGHG1/C1QA/C1QB/C1QC/TREM2/IGHM/IGHV3-30/IGHV3-7/IGHV4-59/IGHV3-23/IGHV3-11/IGHV4-61/IGHV4-39/IGHG3/IGHV4-4/IGHG2/IGHV3-48/IGHV4-34/IGHV3-33/IGHV3-74/TRDC/IGHV3-72/IGHV1-3/IGHV3-43/C3/IGHV3-15/IGHV1-24/IGHV3-21/IGHV4-31/IGHV1-69D/IGHG4/IGHV4-28/IGHV3-20/IGHV3-53/CD55/IGHV1-18/IGHV5-51/IGHV3-66/IGHV6-1/IGHV3…	65
GO:0008154	BP	GO:0008154	actin polymerization or depolymerization	104/5405	200/18903	2.33919e-12	8.87241e-11	5.59668e-11	ENAH/PRKCE/SPTBN1/TMSB10/NCKAP1/RHOA/FAM107A/ADD1/DBN1/RAC1/ELN/WASL/DIAPH2/DMTN/GSN/SPTAN1/ABL1/SWAP70/CDC42EP2/CTTN/RDX/ESAM/SVIL/CXCL12/LIMA1/CYFIP1/SPTBN5/TMOD2/TMOD3/CORO1A/CSF3/PPP1R9B/CDC42EP4/DSTN/KANK3/CDC42EP5/CDC42EP1/TRIOBP/SSH1/HIP1R/EPS8/KIRREL1/BRK1/PIK3CA/CAPZA2/MTPN/TWF1/WAS/ARPC1A/NCK1/ARHGAP35/ABI2/MICAL3/ARPC1B/CDC42EP3/PLEKHG2/FLII/MSRB2/CFL2/ARPC5L/SPATC1L/PREX1/ADD3/PLEK/CF…	104
GO:1990778	BP	GO:1990778	protein localization to cell periphery	156/5405	337/18903	2.80453e-12	1.05752e-10	6.6708e-11	VAMP3/CLSTN1/EPHA2/MACF1/S100A10/RAB13/ROCK2/PRKCE/SPTBN1/VAMP5/DAG1/CPLX1/DAB2/RAB3C/FCHO2/KIF13A/FLOT1/EZR/AFDN/RAMP3/GNAI1/CAV1/STXBP1/CD81/DCHS1/PICALM/RDX/ITGB1/TSPAN15/TSPAN14/TNFRSF1A/LRP6/GAS6/MMP14/EHD4/RAB11A/SLC9A3R2/EMP2/TMEM88/JUP/RAMP2/PPP1R9B/MYL12A/LAMA5/PALM/EHD2/ZDHHC8/PACS2/RAP2A/ZDHHC3/EPB41L3/AP2M1/RILPL1/ATP2B4/CNPY4/VAMP8/PRKCH/ABI3/TTC7B/ITGB1BP1/EPB41L2/FLNA/F11R/APPL1/PP…	156
GO:0046578	BP	GO:0046578	regulation of Ras protein signal transduction	101/5405	193/18903	2.926e-12	1.09691e-10	6.91926e-11	ABL2/ITPKB/MAP4K4/IQSEC1/ROBO1/HEG1/SPRY1/ARHGEF28/F2R/RASGRF2/ARAP3/SPRY4/FLOT1/RGL2/RAC1/RASA4/STARD8/DLC1/PPP2CB/DAB2IP/ABL1/NOTCH1/ARRB1/RDX/ITGB1/NRP1/KITLG/KCTD10/STARD13/LPAR6/MCF2L/ADGRG1/CRK/TNFAIP1/GIT1/KANK2/F2RL3/GPR4/RASIP1/BCR/ARHGAP17/RALBP1/OPHN1/NET1/STMN1/EPS8/RASA4B/F11R/MET/LZTR1/PDGFRB/SYDE1/ARHGAP35/ARHGEF3/ARHGEF2/ITGA3/GPR65/CYTH2/IQSEC2/PRAG1/GIT2/CBL/RASA1/SHOC2/KRAS/SGS…	101
GO:0071346	BP	GO:0071346	cellular response to interferon-gamma	70/5405	118/18903	3.004e-12	1.11964e-10	7.06265e-11	VAMP3/FLNB/EDN1/GSN/STXBP1/ASS1/CDC42EP2/VIM/CX3CL1/MYO1C/CCL2/CCL14/CCL23/CDC42EP4/ACTG1/DAPK3/CDC37/LGALS9/PPARG/GBP4/TLR4/GBP1/CCL4/IFNGR1/TP53/WAS/SYNCRIP/CCL5/ZYX/PARP9/NMI/CCL3/PARP14/IFNGR2/STX4/JAK1/SLC26A6/KIF5B/VPS26B/CDC42/SOCS1/AIF1/CCL21/TNF/GBP5/RPL13A/HLA-DPA1/CCL20/CCL3L1/IFNG/HCK/IL12RB1/IRF8/GBP2/XCL2/TLR2/XCL1/FASLG/TXK/IRF1/MRC1/CCL18/RAB20/CCL24/CASP1/ACTR3/PTPN2/CD47/CCL11/S…	70
GO:0071219	BP	GO:0071219	cellular response to molecule of bacterial origin	117/5405	234/18903	3.17728e-12	1.17742e-10	7.4271e-11	PRKCE/RHOA/PLSCR4/MEF2C/SASH1/CD36/SERPINE1/NOS3/DAB2IP/ASS1/ABL1/VIM/EFNB2/MAPK3/CX3CL1/PLSCR3/GIT1/CCL2/CSF3/TBXA2R/CARD8/BCR/LBP/HMGB1/EDNRB/LDOC1/CHMP5/TSPO/SCARB1/TLR4/SBNO2/AKT1/TNFAIP3/SLC7A5/TRIM5/SIGIRR/CAPN2/PABPN1/CCL5/IL6/HADHB/PDE4B/TNIP2/CDK4/CARD16/UPF1/MAPK14/PRDX2/ADAM9/CCL3/PTPN22/PRPF8/XBP1/HSF1/SPI1/FCGR2B/NR1D1/SIRT2/CD6/BCL10/MTDH/TNF/RELA/CXCL11/CD86/IL1B/LILRB1/LY96/IL18/H…	117
GO:0034620	BP	GO:0034620	cellular response to unfolded protein	62/5405	100/18903	3.4672e-12	1.27752e-10	8.05851e-11	BOK/STC2/DAB2IP/CCND1/HSPB8/DNAJC10/TMTC4/HERPUD1/NCK1/DERL3/ERMP1/MBTPS1/BAG3/COPS5/ATF6B/VAPB/EIF2S1/WFS1/EIF2AK2/BFAR/OS9/XBP1/AMFR/HSF1/PIGBOS1/DDRGK1/SERP1/BAX/VCP/ATF6/OPTN/HSPA1B/HSPD1/AGR2/STUB1/HSPA8/DNAJB9/ERLEC1/ERN1/EIF2AK3/TMBIM6/BCL2L11/ERN2/PTPN1/HSPA13/PPP1R15B/HSPA1A/CDK5RAP3/RHBDD2/HSPA6/ERO1A/NFE2L2/DDIT3/PTPN2/ATF3/HERPUD2/PPP1R15A/HSPA9/HSPA5/BAK1/DERL1/PIK3R1	62
GO:0015986	BP	GO:0015986	proton motive force-driven ATP synthesis	51/5405	76/18903	3.55608e-12	1.30282e-10	8.21811e-11	NDUFC1/NDUFA8/NDUFA12/ATP5PF/NDUFB2/ATP5F1E/NDUFB1/ATP5F1C/NDUFC2/NDUFB6/NDUFS2/NDUFS4/NDUFA11/ATP5ME/NDUFB3/ATP5MC1/NDUFB4/ATP5PD/ATP5PO/NDUFAB1/SDHD/NDUFS6/NDUFB10/NDUFA10/SDHC/NDUFB7/NDUFB5/NDUFB8/ATP6V1A/NDUFA1/NDUFA7/NDUFS8/NDUFB9/NDUFS5/NDUFS3/NDUFA3/STOML2/NDUFA2/NDUFA13/NDUFA6/NDUFA9/ATP5F1B/ATP5PB/ATP5F1D/NDUFV3/NDUFS7/ATP5MC2/ATP5MF/ATP5F1A/ATP6V0C/ATP5MG	51
GO:2001235	BP	GO:2001235	positive regulation of apoptotic signaling pathway	77/5405	135/18903	4.11433e-12	1.49882e-10	9.45451e-11	PEA15/PTPRC/INHBB/BOK/HYAL2/TNFSF10/MSX1/CTNNA1/TPD52L1/FIS1/CAV1/SRPX/SFRP1/MYC/DAB2IP/NACC2/LTBR/THBS1/PML/TIMP3/STK3/BCAP31/SERINC3/NGFR/ITM2C/TP53/NCK1/BAD/TRAF7/TNFSF12/BECN1/SLC9A3R1/STK4/PPP2R1A/PARK7/PDIA3/PPP2R1B/CTSH/PTEN/LCK/HTRA2/DNM1L/MAGED1/BAX/EEF1E1/RBCK1/PAK2/RPS7/BCL10/FBH1/TNF/EIF5A/PMAIP1/S100A9/PRKCD/RPL26/UBB/S100A8/INHBA/MCL1/CYLD/MAL/BCL2L11/SKIL/DEDD2/NUPR1/G0S2/SFPQ/FAS/…	77
GO:0048041	BP	GO:0048041	focal adhesion assembly	55/5405	85/18903	4.78611e-12	1.73375e-10	1.09364e-10	MACF1/S100A10/ROCK2/MAP4K4/RHOA/FAM107A/PHLDB2/APOD/LIMCH1/KDR/ITGA2/PTPRK/RAC1/DLC1/DMTN/SFRP1/PTK2/TEK/ABL1/CTTN/THY1/NRP1/VCL/ACVRL1/THSD1/ARHGEF7/MMP14/FERMT2/ACTN1/THBS1/PEAK1/TAOK2/ACTG1/DAPK3/PPM1F/BCR/SLK/ITGB1BP1/RCC2/STON1/SMAD3/DUSP3/PTPRA/SORBS1/TLN1/PTEN/DUSP22/CORO1C/LIMS1/POLDIP2/PTK2B/BCL2/VEGFA/SDC4/PTPRJ	55
GO:0042129	BP	GO:0042129	regulation of T cell proliferation	96/5405	182/18903	5.51153e-12	1.98538e-10	1.25237e-10	PTPRC/IGFBP2/TGFBR2/CTNNB1/HES1/IL6ST/EFNB1/CD81/LRRC32/KITLG/CD276/CORO1A/RAC2/HMGB1/LGALS9/SOS1/PNP/CD46/PPP3CA/CD3E/TWSG1/NCK1/STAT5B/CCL5/HLA-E/SELENOK/PRKAR1A/IL6/PTEN/VCAM1/IL15/ANXA1/PTPN22/SASH3/NCKAP1L/PTPN6/NDFIP1/ZAP70/CD6/AIF1/VSIR/SYK/SPN/CD86/IL1B/HLA-DPA1/DHPS/LILRB1/IL18/HAVCR2/CD28/LILRB4/SLAMF1/CTLA4/CD70/LILRB2/TNFSF9/IL12RB1/VSIG4/CBLB/CRTAM/HLA-DPB1/IL2RA/TNFRSF9/XCL1/IL1A/CA…	96
GO:0006986	BP	GO:0006986	response to unfolded protein	79/5405	141/18903	7.58942e-12	2.7187e-10	1.71494e-10	BOK/STC2/HSPB1/DAB2IP/CCND1/SERPINH1/HSPB8/THBS1/DNAJC10/HSP90AA1/TMTC4/HERPUD1/NCK1/DERL3/ERMP1/MBTPS1/BAG3/COMP/DNAJB4/COPS5/ATF6B/VAPB/EIF2S1/WFS1/EIF2AK2/BFAR/OS9/XBP1/AMFR/HSF1/PIGBOS1/DDRGK1/SERP1/FAF2/BAX/VCP/ATF6/OPTN/HSPA1B/HSPD1/DNAJB1/STT3B/UBE2J2/HSPE1/AGR2/STUB1/HSPA8/DNAJB9/ERLEC1/HSPH1/UBXN4/TRAM1/ERN1/EIF2AK3/TMBIM6/BCL2L11/ERN2/PTPN1/HSPA13/PPP1R15B/HSPA1A/CDK5RAP3/RHBDD2/HSPA6/E…	79
GO:0050671	BP	GO:0050671	positive regulation of lymphocyte proliferation	81/5405	146/18903	8.26984e-12	2.94607e-10	1.85837e-10	PTPRC/TACR1/IGFBP2/TGFBR2/HES1/IL6ST/MEF2C/EFNB1/CD81/KITLG/CD276/CORO1A/CD40/CD320/HMGB1/LGALS9/SLC39A10/PNP/TLR4/CD46/PPP3CA/CD3E/NCK1/STAT5B/GPR183/CCL5/HLA-E/CD38/SELENOK/IL6/VCAM1/IL15/ANXA1/PTPN22/SASH3/NCKAP1L/ZAP70/CD6/AIF1/SYK/CD86/IL1B/HLA-DPA1/DHPS/FCGR3A/IL18/HAVCR2/CD28/BTK/SLAMF1/CD70/LILRB2/TNFSF9/IL12RB1/IRS2/HLA-DPB1/BCL2/IL2RA/XCL1/IL1A/CARD11/CD24/CDKN1A/TMIGD2/PRKCQ/IL23A/FOXP…	81
GO:0035023	BP	GO:0035023	regulation of Rho protein signal transduction	56/5405	88/18903	8.36774e-12	2.95567e-10	1.86442e-10	ABL2/ROBO1/HEG1/ARHGEF28/F2R/RASGRF2/ARAP3/FLOT1/RAC1/STARD8/DLC1/ABL1/ARRB1/ITGB1/NRP1/KCTD10/STARD13/LPAR6/MCF2L/ADGRG1/TNFAIP1/KANK2/F2RL3/GPR4/RASIP1/BCR/RALBP1/OPHN1/NET1/STMN1/EPS8/F11R/MET/PDGFRB/ARHGAP35/ARHGEF3/ARHGEF2/ITGA3/GPR65/PRAG1/P2RY10/COL3A1/ARHGDIA/GPR174/GPR35/CDC42SE2/GPR18/RIPOR2/EPS8L3/AKAP13/EPS8L2/ABCA1/APOE/ARHGDIB/CDC42SE1/APOA1	56
GO:0045765	BP	GO:0045765	regulation of angiogenesis	159/5405	349/18903	8.38844e-12	2.95567e-10	1.86442e-10	EPHA2/HSPG2/TIE1/NPR1/EFNA1/CD34/AKT3/ROCK2/RHOB/TGFBR2/CTNNB1/HYAL1/STAB1/ADAMTS9/GATA2/PLXND1/KDR/SMAD1/VEGFC/PLK2/SEMA6A/ECSCR/SPARC/FOXC1/SASH1/DLL1/AQP1/BMPER/HSPB1/SERPINE1/TSPAN12/NOS3/VEGFD/ANGPT2/ADGRA2/SFRP1/ENPP2/TEK/KLF4/DAB2IP/ENG/ABL1/APLNR/ETS1/JCAD/ITGB1/NRP1/HHEX/RAPGEF3/ACVRL1/ITGA5/FLT1/COL4A2/RHOJ/PGF/VASH1/TJP1/THBS1/PML/EMP2/CDH5/EPN2/JUP/RAMP2/GRN/PTPRM/PLCG1/CD40/TBXA2R/GP…	159
GO:1901342	BP	GO:1901342	regulation of vasculature development	161/5405	355/18903	9.69778e-12	3.39844e-10	2.14372e-10	EPHA2/HSPG2/TIE1/NPR1/EFNA1/CD34/AKT3/ROCK2/RHOB/TGFBR2/CTNNB1/HYAL1/STAB1/ADAMTS9/GATA2/PLXND1/KDR/SMAD1/VEGFC/PLK2/SEMA6A/ECSCR/SPARC/FOXC1/SASH1/DLL1/AQP1/BMPER/HSPB1/SERPINE1/TSPAN12/NOS3/VEGFD/ANGPT2/ADGRA2/SFRP1/ENPP2/TEK/KLF4/DAB2IP/ENG/ABL1/APLNR/ETS1/JCAD/ITGB1/NRP1/HHEX/RAPGEF3/ACVRL1/ITGA5/FLT1/COL4A2/RHOJ/PGF/VASH1/TJP1/THBS1/PML/EMP2/CDH5/EPN2/JUP/RAMP2/GRN/PTPRM/ID1/PLCG1/CD40/TBXA2…	161
GO:0032946	BP	GO:0032946	positive regulation of mononuclear cell proliferation	82/5405	149/18903	1.08529e-11	3.78266e-10	2.38609e-10	PTPRC/TACR1/IGFBP2/TGFBR2/HES1/IL6ST/MEF2C/EFNB1/CD81/KITLG/CD276/CORO1A/CD40/CD320/HMGB1/LGALS9/SLC39A10/PNP/TLR4/CD46/PPP3CA/CD3E/NCK1/STAT5B/GPR183/CCL5/HLA-E/CD38/SELENOK/IL6/VCAM1/IL15/ANXA1/PTPN22/BCL2L1/SASH3/NCKAP1L/ZAP70/CD6/AIF1/SYK/CD86/IL1B/HLA-DPA1/DHPS/FCGR3A/IL18/HAVCR2/CD28/BTK/SLAMF1/CD70/LILRB2/TNFSF9/IL12RB1/IRS2/HLA-DPB1/BCL2/IL2RA/XCL1/IL1A/CARD11/CD24/CDKN1A/TMIGD2/PRKCQ/IL2…	82
GO:0150116	BP	GO:0150116	regulation of cell-substrate junction organization	47/5405	69/18903	1.10157e-11	3.81878e-10	2.40887e-10	MACF1/S100A10/ROCK2/MAP4K4/IQSEC1/RHOA/FAM107A/PHLDB2/APOD/LIMCH1/KDR/RAC1/DLC1/DMTN/SFRP1/PTK2/TEK/ABL1/THY1/NRP1/VCL/ACVRL1/MMP14/FERMT2/THBS1/PEAK1/ACTG1/DAPK3/PPM1F/SLK/LAMTOR2/ITGB1BP1/RCC2/SMAD3/DUSP3/PTPRA/TLN1/PTEN/DUSP22/CORO1C/LIMS1/POLDIP2/VEGFA/SDC4/PTPRJ/ARF6/PIK3R1	47
GO:0051098	BP	GO:0051098	regulation of binding	167/5405	372/18903	1.10971e-11	3.82643e-10	2.4137e-10	TGFBR3/S100A10/ADAM15/NES/NUCKS1/RALB/EPHA4/CTNNB1/PLXND1/HES1/ADD1/MSX1/LEF1/DAB2/ITGA2/FOXC1/FLOT1/MDFI/CAV1/CLIC2/PPP2CB/HEY1/CTHRC1/ZNF462/KLF4/ABL1/NRP1/TCF7L2/CTBP2/ARHGEF7/ANXA2/MAPK3/CRK/DHRS7B/CCL23/CSF3/ACE/FKBP1A/ID1/CLDN5/PDGFB/APP/EBF2/IFI16/STK3/HMGB1/LDOC1/DISC1/CSNK1E/PRKACA/PPARG/HIP1R/ITGB1BP1/MFNG/STMN1/SKI/NME1/CALM1/HMBOX1/CTNNBIP1/MET/PPP3CA/LARP6/LAMTOR5/ATP2A2/AKT1/SMAD3/I…	167
GO:0071621	BP	GO:0071621	granulocyte chemotaxis	74/5405	130/18903	1.22438e-11	4.19935e-10	2.64893e-10	HRH1/ITGA9/EDN1/RAC1/PTK2/JAM3/THBS1/MAPK3/CX3CL1/CCL2/CCL14/CCL23/PIP5K1C/RAC2/LBP/PPIA/ITGA1/IL17RC/ITGB2/BSG/PPIB/CCL4/CCL5/C1QBP/PDE4B/PREX1/DNM1L/ANXA1/CCL3/FCER1G/NCKAP1L/CCL21/SYK/CXCL11/JAML/IL1B/TREM1/VAV1/RARRES2/CCL20/CCR7/CCL3L1/SLAMF1/CSF1R/S100A9/C3AR1/C5AR1/CXCL2/XCL2/PIK3CD/ADGRE2/XCL1/RIPOR2/S100A8/CXADR/CXCL8/PIK3CG/IL23A/CSF3R/SCG2/CXCL13/CXCL5/S100A12/CXCL17/CCL18/CCL24/S100A1…	74
GO:0043410	BP	GO:0043410	positive regulation of MAPK cascade	211/5405	496/18903	1.26814e-11	4.32645e-10	2.7291e-10	SHC1/EFNA1/PTPRC/ROCK2/PRKCE/SEMA4C/SH3RF3/EPHA4/ACKR3/STK25/CTNNB1/GNAI2/ROBO1/KDR/F2R/MEF2C/NDST1/FLT4/EDN1/TPD52L1/SASH1/NOD1/BMPER/RAMP3/IGFBP3/CD36/CAV2/MID1/SORBS3/FGFR1/TEK/NTRK2/DAB2IP/ABL1/NOTCH1/CD81/CAVIN3/CD44/MAP3K11/P2RY6/ARRB1/FZD4/NOX4/PDGFD/DIXDC1/JCAD/NRP1/LTBR/KITLG/FLT1/KL/GAS6/FERMT2/THBS1/PDE8A/TAOK2/MAPK3/CX3CL1/DOK4/CRK/CCL2/CCL14/CCL23/IGFBP4/MAP3K3/PLCB1/CD40/SHC2/INSR/P…	211
GO:0044403	BP	GO:0044403	biological process involved in symbiotic interaction	143/5405	307/18903	1.28179e-11	4.35e-10	2.74396e-10	EPHA2/FCN3/NUCKS1/ROCK2/CHMP3/INHBB/ITGAV/DAG1/HYAL2/PLSCR1/LEF1/ITGA2/SNX3/CAV2/CAV1/ZDHHC9/CTSL/GSN/STOM/IFITM2/IFITM1/IFITM3/CD81/ITGB1/NRP1/ITGA5/EFNB2/GAS6/IFI27/INSR/LDLR/PVR/NECTIN2/ZDHHC8/APOL1/HMGB1/LGALS9/CHMP5/SCARB1/PPIA/VAMP8/CXCR4/ICAM1/HDAC1/CD46/F11R/CHMP2A/PAIP1/SCARB2/FURIN/LAMP1/EEA1/BSG/PPIB/TRIM8/ROMO1/IFIT1/CCL4/UVRAG/TRIM5/LGALS1/TAF11/TARDBP/CCL5/DDX39B/DYNLT1/CDK9/SMARCA4…	143
GO:0007596	BP	GO:0007596	blood coagulation	112/5405	225/18903	1.31787e-11	4.44902e-10	2.80642e-10	PEAR1/SELP/CSRP1/CD34/FAP/TFPI/PROS1/PLSCR1/MMRN1/ITGA2/IL6ST/F2R/EDN1/HSPB1/CD36/SERPINE1/CAV1/NOS3/DMTN/FZD6/GNAQ/STXBP1/CD59/SERPING1/ST3GAL4/PLAU/VCL/ENTPD1/VWF/CD9/ANO6/SH2B3/DGKH/GAS6/THBS1/ANXA2/ADAMTS18/ACTG1/MYL12A/THBD/PROCR/MYL9/CD40/GNAS/TBXA2R/F2RL3/MYH9/PDGFB/F8/VKORC1/PPIA/ILK/F10/TLR4/PIK3CA/FLNA/F11R/CLIC1/SRF/ANXA5/DGKZ/WAS/GNA12/C1QTNF1/FUNDC2/IL6/COMP/DGKE/MAPK14/TLN1/PLEK/AK3…	112
GO:0006119	BP	GO:0006119	oxidative phosphorylation	81/5405	147/18903	1.32825e-11	4.46071e-10	2.81379e-10	PINK1/RHOA/NDUFC1/NDUFA8/NDUFA12/COX7A1/ATP5PF/NDUFB2/COX6C/ATP5F1E/NDUFB1/COX5B/ATP5F1C/UQCRQ/COX4I2/UQCR11/NDUFC2/NDUFB6/NDUFS2/SNCA/NDUFS4/NDUFA11/ATP5ME/NDUFB3/PARK7/NDUFB4/ATP5PD/DNAJC15/ATP5PO/NDUFAB1/SDHD/SDHAF2/NDUFA4/UQCC2/UQCC3/NDUFS6/NDUFB10/COQ9/NDUFA10/SDHC/NDUFB7/NDUFB5/NDUFB8/VCP/COX6A1/NDUFA1/NDUFA7/NDUFS8/NDUFB9/NDUFS5/NDUFS3/COX7A2L/TNF/NDUFA3/STOML2/NDUFA2/NDUFA13/NDUFA6/COX7A2…	81
GO:0031334	BP	GO:0031334	positive regulation of protein-containing complex assembly	99/5405	192/18903	1.49244e-11	4.98615e-10	3.14524e-10	PINK1/TAL1/RHOC/PRKCE/NCKAP1/RHOA/MAP1B/FSCN1/RAC1/CD36/MSN/ASAP1/DAB2IP/ARL2/CDC42EP2/CTTN/FERMT2/FES/CDH5/PIEZO1/GIT1/CSF3/CDC42EP4/RASIP1/CDC42EP5/CDC42EP1/DCTN1/LCP1/HIP1R/KIRREL1/BRK1/TLR4/MET/HSP90AA1/NUMA1/CLU/FNIP2/PPP2R5B/SH3GLB1/TP53/DHX33/EIF4G1/NCK1/SNCA/CRBN/UNC13B/TPPP3/CDC42EP3/PARK7/PLEK/SUMO1/SKAP1/MTOR/BAIAP2/STMP1/BAX/VCP/NCKAP1L/MLST8/BIK/CCL21/TNF/FCHSD2/SYK/VASP/HSPA1B/ISG15…	99
GO:0045446	BP	GO:0045446	endothelial cell differentiation	70/5405	121/18903	1.55961e-11	5.18368e-10	3.26984e-10	CLIC4/TIE1/S1PR1/ROCK2/ATOH8/BMPR2/CTNNB1/FSTL1/HEG1/ADD1/KDR/NOTCH4/EZR/AFDN/DLL1/PLOD3/MSN/STC1/SOX17/HEY1/COL15A1/NOTCH1/PDE2A/RDX/ROBO4/ZEB1/NRP1/VCL/TNFRSF1A/APOLD1/RAPGEF3/ACVRL1/TJP1/NR2F2/CDH5/PECAM1/PLCB1/JAG1/ID1/SOX18/CLDN5/COL18A1/EDNRB/CXCR4/ICAM1/F11R/MET/VEZF1/BTG1/RAPGEF2/FOXJ2/SMAD4/HOXB5/GSTM3/TNF/RAP1A/IL1B/EDF1/RAPGEF1/TMEM100/PPP1R16B/VEGFA/CLDN3/FOXP3/RBPJ/HPSE/NRG1/PDE4D/KD…	70
GO:0050878	BP	GO:0050878	regulation of body fluid levels	173/5405	390/18903	1.59703e-11	5.28085e-10	3.33114e-10	ELOVL1/GJA5/NPR1/PEAR1/SELP/CSRP1/CD34/PRKCE/TACR1/FAP/TFPI/GNAI2/HYAL2/PROS1/HEG1/PLSCR1/MMRN1/ITGA2/IL6ST/F2R/PAM/EDN1/SLC29A1/AQP1/HSPB1/CD36/SERPINE1/CAV1/NOS3/APLN/AVPR2/DMTN/FZD6/PLEC/GNAQ/KLF4/STXBP1/CD59/APLNR/SERPING1/CCND1/ST3GAL4/PLAU/VCL/ENTPD1/VWF/CD9/ANO6/SOCS2/SH2B3/DGKH/GAS6/THBS1/ANXA2/EMP2/ADAMTS18/CYBA/ACTG1/MYL12A/THBD/PROCR/MYL9/CD40/GNAS/TBXA2R/F2RL3/MYH9/PDGFB/EXT2/F8/EDNRB…	173
GO:0006898	BP	GO:0006898	receptor-mediated endocytosis	124/5405	257/18903	1.61821e-11	5.32357e-10	3.35808e-10	HSPG2/FNBP1L/SELE/DNM3/RALB/ITGAV/CALCRL/ACKR3/TGFBR2/STAB1/DAB2/FCHO2/PDLIM7/FLOT1/EZR/DLL1/RAC1/SFRP4/RAMP3/HIP1/CD36/SERPINE1/CAV2/CAV1/WASL/APLN/CTSL/CD81/LDLRAD3/CTTN/ARRB1/PICALM/CUBN/ITGB1/CD9/LRP6/CD63/EFNB2/NEDD4/ANXA2/SCARF1/AP2B1/RAMP2/PIP5K1C/INSR/LDLR/AP2S1/CLTA/LYVE1/AP2M1/OPHN1/HIP1R/AP1S1/AP2A2/RALA/MICALL1/SCARB2/ITGB2/NUMB/TNK2/ADM/CLU/CLTC/ITSN1/MTMR2/AP2A1/ATXN2/DLG4/CANX/SNCA…	124
GO:0034614	BP	GO:0034614	cellular response to reactive oxygen species	82/5405	150/18903	1.72635e-11	5.65051e-10	3.56432e-10	PINK1/RHOB/STK25/EDN1/PTPRK/AQP1/CD36/NOS3/ABL1/IL18BP/PDGFD/AKR1C3/PLEKHA1/PXN/PDE8A/MAPK3/MMP2/NQO1/PCGF2/MAP1LC3A/AGAP3/CYP1B1/PRDX1/TPM1/MPV17/NET1/CAMKK2/SPHK1/STAT6/PKD2/MET/ZNF580/KLF2/AKT1/TNFAIP3/ROMO1/NCF1/FOXP1/FBLN5/HDAC2/FOS/PRKAA1/BECN1/IL6/PARK7/TRAP1/TXN/PDK2/PRDX3/IMPACT/PRDX2/APEX1/PRDX5/ANXA1/NR4A3/SETX/CAT/HSF1/SIGMAR1/PDCD10/DDR2/RELA/BTK/FYN/PRKCD/PPIF/STK26/ERN1/SOD2/IL10/T…	82
GO:0007599	BP	GO:0007599	hemostasis	114/5405	231/18903	1.75267e-11	5.7077e-10	3.60039e-10	PEAR1/SELP/CSRP1/CD34/FAP/TFPI/PROS1/PLSCR1/MMRN1/ITGA2/IL6ST/F2R/EDN1/HSPB1/CD36/SERPINE1/CAV1/NOS3/AVPR2/DMTN/FZD6/GNAQ/STXBP1/CD59/SERPING1/ST3GAL4/PLAU/VCL/ENTPD1/VWF/CD9/ANO6/SH2B3/DGKH/GAS6/THBS1/ANXA2/ADAMTS18/ACTG1/MYL12A/THBD/PROCR/MYL9/CD40/GNAS/TBXA2R/F2RL3/MYH9/PDGFB/F8/VKORC1/PPIA/ILK/F10/TLR4/PIK3CA/FLNA/F11R/CLIC1/FLI1/SRF/ANXA5/DGKZ/WAS/GNA12/C1QTNF1/FUNDC2/IL6/COMP/DGKE/MAPK14/TL…	114
GO:0009144	BP	GO:0009144	purine nucleoside triphosphate metabolic process	120/5405	247/18903	1.9384e-11	6.2808e-10	3.9619e-10	PINK1/RHOA/ZBTB20/NDUFC1/NT5E/FIS1/GIMAP7/NDUFA8/AK1/SLC25A25/ARL2/NDUFA12/NME4/GIT1/NME2/INSR/APP/ATP5PF/TSPO/HIF1A/NUDT16/NDUFB2/HK1/NME1/ATP5F1E/SLC25A13/AK2/NME3/NDUFB1/PFKM/ATP5F1C/FOXK1/JMJD8/NDUFC2/NDUFB6/NDUFS2/BAD/NDUFS4/PRKAA1/NDUFA11/ATP5ME/NDUFB3/ATP5MC1/ZBTB7A/STAT3/NDUFB4/ATP5PD/PFKL/ATP5PO/AK3/NDUFAB1/NUDT5/SAMHD1/SDHD/UQCC3/NDUFS6/NDUFB10/DNM1L/MTOR/GALK1/NDUFA10/SDHC/NDUFB7/EIF6/…	120
GO:0033673	BP	GO:0033673	negative regulation of kinase activity	117/5405	240/18903	2.61012e-11	8.41503e-10	5.30816e-10	PTPRC/SH3BP5/HYAL2/HEG1/WWTR1/SPRY1/SPRY4/PRKAR1B/HSPB1/CAV1/SFRP1/FABP4/PLEC/GNAQ/DAB2IP/ABL1/HIPK3/LRP5/THY1/HHEX/LRP6/PTPRB/SH2B3/LATS2/NR2F2/PIP4K2B/PKIG/RASIP1/PPM1F/ADARB1/SFRP2/SPRED1/DUSP7/YWHAG/AIDA/PPIA/PPARG/CDKN1C/PKN1/ITGB1BP1/PPP2R5A/AKT1/MLLT1/TNFAIP3/MIDN/APC/RGS2/SOCS5/SNCA/TSC2/DUSP3/IPO5/CHMP6/IRAK3/PRKAR1A/DEPTOR/PARK7/MVP/PRKAR2A/PRDX3/VPS25/PTEN/IPO7/CBL/RB1/AKT1S1/PTPN22/BM…	117
GO:0035710	BP	GO:0035710	CD4-positive, alpha-beta T cell activation	67/5405	115/18903	2.73028e-11	8.75865e-10	5.52491e-10	HLX/TGFBR2/LEF1/CTSL/CD81/NKX2-3/HMGB1/LGALS9/STAT6/CD3E/FOXP1/RC3H2/TWSG1/SOCS5/IL4R/GPR183/IL2RG/IL6/NKG7/STAT3/RUNX3/ARMC5/IRF4/ANXA1/MTOR/HLA-DRA/SASH3/LY9/NCKAP1L/NDFIP1/SOCS1/STOML2/VSIR/PTGER4/SPN/CD86/BATF/IL18/CD83/CD28/GATA3/TOX/IFNG/IL12RB1/CBLB/NFKBID/NLRP3/IL2RA/SLAMF6/XCL1/CARD11/TBX21/PRKCQ/IL23A/FOXP3/RELB/RUNX1/CD55/IL6R/ZC3H12A/ARG2/IL18R1/RIPK2/BRAF/MALT1/NFKBIZ/RORA	67
GO:0050854	BP	GO:0050854	regulation of antigen receptor-mediated signaling pathway	45/5405	66/18903	2.87464e-11	9.17607e-10	5.78822e-10	PTPRC/EZR/CD81/THY1/NECTIN2/SLC39A10/PRKCH/PRKD2/GBP1/DGKZ/FOXP1/LAPTM5/DUSP3/LPXN/LCK/PTPN22/RAB29/DUSP22/FCGR2B/PTPN6/BCL10/RELA/PHPT1/SLA2/CD300A/TRAT1/PRKCB/SH2D1A/CCR7/LILRB4/CD19/CBLB/STAP1/CARD11/BLK/KCNN4/TESPA1/CD226/UBASH3A/ELF1/LYN/PTPRJ/PTPN2/PRNP/MALT1	45
GO:0050856	BP	GO:0050856	regulation of T cell receptor signaling pathway	34/5405	44/18903	2.96341e-11	9.41283e-10	5.93757e-10	EZR/CD81/THY1/NECTIN2/PRKD2/GBP1/DGKZ/LAPTM5/DUSP3/LCK/PTPN22/RAB29/DUSP22/PTPN6/BCL10/RELA/PHPT1/SLA2/CD300A/TRAT1/SH2D1A/CCR7/LILRB4/CBLB/CARD11/KCNN4/TESPA1/CD226/UBASH3A/ELF1/PTPRJ/PTPN2/PRNP/MALT1	34
GO:1901653	BP	GO:1901653	cellular response to peptide	166/5405	373/18903	2.99345e-11	9.46164e-10	5.96836e-10	C1QTNF12/PIK3R3/LEPROT/RAB13/SHC1/NUCKS1/KLF11/ROCK2/INHBB/EPHA4/GNAI2/MAP1B/EDN1/GJA1/NOD1/GRB10/CD36/PDK4/CAV2/CAV1/PTK2/ASS1/PIK3C2A/VIM/TNS2/SOCS2/PXN/KL/CYFIP1/FBN1/BCAR1/CYBA/CRK/MYO1C/PIP4K2B/PPP1R9B/SOCS3/PLCB1/ID1/INSR/APP/SOGA1/CYP1B1/LDOC1/CHMP5/YWHAG/PPARG/ICAM1/TBC1D4/ADCY6/STAT6/TLR4/PIK3CA/APPL1/KLF2/SLC27A1/IGF1R/AKT1/AHCYL1/BACE1/UCP2/MZB1/NGFR/ZNF106/PRKDC/GSK3A/TP53/FOXO1/APC/N…	166
GO:0043123	BP	GO:0043123	positive regulation of I-kappaB kinase/NF-kappaB signaling	97/5405	189/18903	3.37167e-11	1.06051e-09	6.68966e-10	PLEKHG5/PINK1/WLS/RHOC/S100A13/PRKCE/CTNNB1/SHISA5/RHOA/TNFSF10/PLK2/F2R/GJA1/NOD1/CD36/TSPAN6/TNFRSF10B/ABL1/TNFRSF1A/LTBR/GPRC5B/CX3CL1/MAP3K3/FKBP1A/CD40/SLC44A2/LGALS9/PIM2/TRAF3IP2/APOL3/TLR4/FLNA/PPP5C/LAMTOR5/TRIM8/BIRC3/TRIM5/DDX1/LGALS1/JMJD8/S100A4/ANKRD17/MAVS/ZDHHC13/TNIP2/TRIM25/TMEM101/CARD16/DHX15/BST2/SHARPIN/ATP2C1/CASP10/VAPA/RBCK1/TFG/BRD4/UBD/NDFIP1/TRIM13/BCL10/MTDH/CCL21/TNF…	97
GO:0008064	BP	GO:0008064	regulation of actin polymerization or depolymerization	85/5405	159/18903	3.56019e-11	1.11437e-09	7.02942e-10	PRKCE/SPTBN1/TMSB10/NCKAP1/RHOA/ADD1/DBN1/ELN/DMTN/GSN/SPTAN1/SWAP70/CDC42EP2/CTTN/RDX/ESAM/SVIL/CXCL12/LIMA1/CYFIP1/SPTBN5/TMOD2/TMOD3/CORO1A/CSF3/CDC42EP4/DSTN/KANK3/CDC42EP5/CDC42EP1/TRIOBP/SSH1/HIP1R/EPS8/KIRREL1/BRK1/PIK3CA/CAPZA2/MTPN/TWF1/WAS/ARPC1A/NCK1/ARHGAP35/ARPC1B/CDC42EP3/PLEKHG2/FLII/CFL2/ARPC5L/ADD3/PLEK/MKKS/MTOR/WDR1/CAPG/RASA1/BAIAP2/ARHGAP18/HCLS1/ARPC4/NCKAP1L/TWF2/MLST8/CCL2…	85
GO:0043280	BP	GO:0043280	positive regulation of cysteine-type endopeptidase activity involved in apoptotic process	71/5405	125/18903	3.64157e-11	1.13434e-09	7.15537e-10	BOK/RHOA/ROBO1/TNFSF10/F2R/NOD1/HIP1/FIS1/BEX3/SOX7/DLC1/MYC/GSN/UACA/PML/CARD8/PPM1F/HMGB1/LGALS9/BCAP31/PPARG/HIP1R/MTCH1/SMAD3/NGFR/PDCD6/LAPTM5/NLRP1/PDCD5/BAD/SNCA/DAP/CTSH/LCK/HTRA2/CASP10/HSF1/BAX/VCP/BCL10/TNF/NDUFA13/SYK/HSPD1/HSPE1/PMAIP1/S100A9/RPS27L/ATP2A3/CTSD/CYCS/P2RX1/NLRP3/FASLG/S100A8/EIF2AK3/BCL2L11/CASP8/CLEC7A/F3/TNFSF15/PRR7/CASP1/FAM162A/FAS/ARL6IP5/MAP3K5/EGLN3/BAK1/PYCAR…	71
GO:0030968	BP	GO:0030968	endoplasmic reticulum unfolded protein response	50/5405	77/18903	3.66694e-11	1.13675e-09	7.17058e-10	BOK/STC2/DAB2IP/CCND1/DNAJC10/TMTC4/HERPUD1/NCK1/DERL3/ERMP1/MBTPS1/COPS5/ATF6B/VAPB/EIF2S1/WFS1/EIF2AK2/BFAR/OS9/XBP1/AMFR/PIGBOS1/DDRGK1/SERP1/BAX/VCP/ATF6/AGR2/STUB1/DNAJB9/ERLEC1/ERN1/EIF2AK3/BCL2L11/ERN2/PTPN1/PPP1R15B/CDK5RAP3/RHBDD2/ERO1A/NFE2L2/DDIT3/PTPN2/ATF3/HERPUD2/PPP1R15A/HSPA5/BAK1/DERL1/PIK3R1	50
GO:0001954	BP	GO:0001954	positive regulation of cell-matrix adhesion	40/5405	56/18903	3.72256e-11	1.14847e-09	7.24451e-10	S100A10/MAP4K4/DAG1/KDR/UTRN/RAC1/CD36/SFRP1/TEK/ABL1/THY1/NRP1/FERMT2/EMP2/CX3CL1/CDH13/JUP/RIN2/FUT1/RRAS/PPM1F/DISC1/ITGB1BP1/EFEMP2/CD3E/SMAD3/SKAP1/LIMS1/CCL21/POLDIP2/PTK2B/CCR7/VEGFA/PLEKHA2/SDC4/FERMT1/CEACAM6/CIB1/PTPRJ/CDK6	40
GO:1990266	BP	GO:1990266	neutrophil migration	73/5405	130/18903	4.05988e-11	1.24658e-09	7.86334e-10	ITGA9/EDN1/RAC1/CD99/JAM3/EMP2/CX3CL1/CCL2/CCL14/CCL23/PECAM1/PIP5K1C/RAC2/LBP/RHOH/PPIA/ITGA1/CD99L2/ITGB2/BSG/PPIB/IL1R1/CCL4/CCL5/C1QBP/SELENOK/PDE4B/PREX1/DNM1L/CCL3/WDR1/FCER1G/NCKAP1L/ADAM8/JAGN1/CCL21/SYK/CXCL11/JAML/IL1B/TREM1/VAV1/CCL20/CCR7/CCL3L1/S100A9/C3AR1/C5AR1/CXCL2/XCL2/PIK3CD/MCOLN2/XCL1/IL1A/RIPOR2/S100A8/CXADR/CXCL8/PIK3CG/IL23A/CSF3R/CXCL13/CXCL5/S100A12/CCL18/CCL24/CXCL1/SRP…	73
GO:0045766	BP	GO:0045766	positive regulation of angiogenesis	96/5405	187/18903	4.16557e-11	1.26696e-09	7.99194e-10	TIE1/CD34/AKT3/RHOB/TGFBR2/HYAL1/GATA2/KDR/SMAD1/VEGFC/SASH1/DLL1/AQP1/BMPER/HSPB1/SERPINE1/NOS3/VEGFD/ANGPT2/TEK/KLF4/ENG/ABL1/APLNR/ETS1/JCAD/ITGB1/NRP1/RAPGEF3/ACVRL1/ITGA5/FLT1/PGF/TJP1/THBS1/EMP2/CDH5/JUP/RAMP2/GRN/PLCG1/CD40/TBXA2R/FUT1/RRAS/SFRP2/CYP1B1/HIF1A/CXCR4/SPHK1/PRKD2/ANGPTL4/PAK4/ADM/PDCD6/JMJD8/DDAH1/BTG1/TNFSF12/HSPB6/LRG1/STAT3/SMOC2/SP1/CTSH/XBP1/JAK1/AGGF1/MTDH/CYSLTR1/CYBB/…	96
GO:1904018	BP	GO:1904018	positive regulation of vasculature development	96/5405	187/18903	4.16557e-11	1.26696e-09	7.99194e-10	TIE1/CD34/AKT3/RHOB/TGFBR2/HYAL1/GATA2/KDR/SMAD1/VEGFC/SASH1/DLL1/AQP1/BMPER/HSPB1/SERPINE1/NOS3/VEGFD/ANGPT2/TEK/KLF4/ENG/ABL1/APLNR/ETS1/JCAD/ITGB1/NRP1/RAPGEF3/ACVRL1/ITGA5/FLT1/PGF/TJP1/THBS1/EMP2/CDH5/JUP/RAMP2/GRN/PLCG1/CD40/TBXA2R/FUT1/RRAS/SFRP2/CYP1B1/HIF1A/CXCR4/SPHK1/PRKD2/ANGPTL4/PAK4/ADM/PDCD6/JMJD8/DDAH1/BTG1/TNFSF12/HSPB6/LRG1/STAT3/SMOC2/SP1/CTSH/XBP1/JAK1/AGGF1/MTDH/CYSLTR1/CYBB/…	96
GO:0002573	BP	GO:0002573	myeloid leukocyte differentiation	108/5405	218/18903	4.39909e-11	1.33171e-09	8.40034e-10	EPHA2/TAL1/TGFBR2/CTNNB1/GATA2/LEF1/CD109/HOXA7/PIR/SFRP1/MYC/CD81/NKX2-3/LTBR/KITLG/FBN1/ANXA2/FES/DHRS7B/CSF3/ZBTB46/MYH9/APP/IFI16/NEDD9/KLF10/PPARG/LRRC17/TLR4/CTNNBIP1/PPP3CA/SBNO2/EVI2B/SH3PXD2A/PIAS3/FOXP1/GPR183/FOS/ZFP36L1/GPR137/MAPK14/TFE3/TYROBP/BAP1/IRF4/IL15/RB1/CCL3/CUL4A/MTOR/ATP6AP1/GLO1/HSF1/SPI1/CREB1/HCLS1/UBD/CDC42/JAGN1/NDFIP1/RASSF2/SOCS1/TNF/LILRB1/BATF/CAMK4/GATA3/TRIB1/C…	108
GO:0034504	BP	GO:0034504	protein localization to nucleus	141/5405	306/18903	4.67516e-11	1.40866e-09	8.88579e-10	LMNA/HYAL2/WWTR1/APOD/MSX1/IPO11/CTNNA1/SUN1/CD36/NOTCH1/ARL2/ZBTB16/HHEX/LATS2/DCLK1/FERMT2/PML/YWHAE/JUP/PKIG/CARD10/PTTG1IP/STK3/ATP13A2/PRICKLE1/TRAF3IP2/FLNA/LIMK2/ARL2BP/PPP3CA/GLIS2/APPL1/HSP90AA1/LAMTOR5/TNPO1/AKT1/SMAD3/TRIM8/NGFR/IPO9/TP53/NUTF2/TSC2/TARDBP/TRIM28/SUMO3/IPO5/KPNA6/MAVS/STK4/BAG3/ZBTB7A/CALR/KPNA3/CTDNEP1/PARK7/STAT3/TXN/HIKESHI/CCT7/SNUPN/MAPK14/NUP85/RASSF5/HDGF/PARP9/…	141
GO:0050727	BP	GO:0050727	regulation of inflammatory response	180/5405	414/18903	4.83182e-11	1.4491e-09	9.14083e-10	C1QTNF12/SELE/PTPRC/FNDC4/CALCRL/HYAL2/CD200/MGLL/MGST2/OSMR/ITGA2/IL6ST/PLK2/NT5E/SERPINE1/FABP4/IL33/TEK/KLF4/CD81/PDE2A/ETS1/TNFRSF1A/C2CD4B/GPRC5B/CX3CL1/CDH5/BCL6B/GIT1/GRN/ACE/SOCS3/YES1/PLCG1/LDLR/GPR4/BCR/APP/LBP/EDNRB/DNASE1L3/C1QTNF3/PPARG/VAMP8/SPHK1/TLR4/SBNO2/FURIN/SMAD3/TNFAIP3/ALOX5AP/IL1R1/BIRC3/NCF1/FOXP1/LGALS1/CST7/STAT5B/NLRP1/CLOCK/NDUFC2/SOCS5/CELF1/SNCA/CCL5/ZYX/HLA-E/GPSM3…	180
GO:0009205	BP	GO:0009205	purine ribonucleoside triphosphate metabolic process	117/5405	242/18903	5.10083e-11	1.52269e-09	9.60507e-10	PINK1/RHOA/ZBTB20/NDUFC1/NT5E/FIS1/GIMAP7/NDUFA8/AK1/SLC25A25/ARL2/NDUFA12/NME4/GIT1/NME2/INSR/APP/ATP5PF/TSPO/HIF1A/NDUFB2/HK1/NME1/ATP5F1E/SLC25A13/AK2/NME3/NDUFB1/PFKM/ATP5F1C/FOXK1/JMJD8/NDUFC2/NDUFB6/NDUFS2/BAD/NDUFS4/PRKAA1/NDUFA11/ATP5ME/NDUFB3/ATP5MC1/ZBTB7A/STAT3/NDUFB4/ATP5PD/PFKL/ATP5PO/AK3/NDUFAB1/NUDT5/SDHD/UQCC3/NDUFS6/NDUFB10/DNM1L/MTOR/GALK1/NDUFA10/SDHC/NDUFB7/EIF6/GNAI3/NADK/NDU…	117
GO:0006959	BP	GO:0006959	humoral immune response	146/5405	320/18903	5.21078e-11	1.54834e-09	9.76689e-10	FCN3/CFH/PTPRC/CFI/C7/MEF2C/NOTCH1/CD81/CD59/SERPING1/A2M/SPNS2/CCL2/TRAF3IP2/CD46/CLU/ROMO1/JCHAIN/GPR183/IGHA1/HLA-E/C1QBP/RGCC/IL6/POU2AF1/C1R/TRBC2/C1RL/TFE3/IGLL5/LYZ/IGKC/FCGR2B/IGHA2/YTHDF2/COLEC11/FAM3A/TRBC1/PTPN6/TNF/BLNK/POU2F2/C1S/CXCL11/IGLC2/ALOX5/IGLC3/IL1B/TREM1/RARRES2/CD83/SH2D1A/CD28/IGHG1/GATA3/C1QA/CCR7/RNASE6/PDCD1/IFNG/C1QB/S100A9/C1QC/CXCL2/CXCL14/VSIG4/CCR6/RPS19/IGKV3-20…	146
GO:0006469	BP	GO:0006469	negative regulation of protein kinase activity	107/5405	216/18903	5.43858e-11	1.60862e-09	1.01471e-09	PTPRC/SH3BP5/HYAL2/HEG1/WWTR1/SPRY1/SPRY4/PRKAR1B/HSPB1/CAV1/SFRP1/FABP4/PLEC/GNAQ/DAB2IP/ABL1/HIPK3/LRP5/THY1/HHEX/LRP6/PTPRB/SH2B3/LATS2/NR2F2/PKIG/RASIP1/PPM1F/ADARB1/SFRP2/SPRED1/DUSP7/YWHAG/AIDA/PPIA/PPARG/CDKN1C/PKN1/ITGB1BP1/AKT1/MLLT1/TNFAIP3/APC/RGS2/SOCS5/SNCA/TSC2/DUSP3/IPO5/CHMP6/IRAK3/PRKAR1A/DEPTOR/PARK7/MVP/PRKAR2A/VPS25/PTEN/IPO7/CBL/RB1/AKT1S1/PTPN22/BMP2/INPP5K/TSG101/DUSP22/RTR…	107
GO:2000401	BP	GO:2000401	regulation of lymphocyte migration	46/5405	69/18903	5.74505e-11	1.69151e-09	1.067e-09	ABL2/RHOA/CD200/APOD/WASL/MSN/ABL1/CXCL12/CORO1A/CRK/SPNS2/CCL2/MADCAM1/JAM2/APP/NEDD9/LRCH1/CD99L2/ADAM10/AKT1/CCL4/CCL5/SELENOK/ADAM17/ITGA4/WNK1/CCL3/DOCK8/ADAM8/AIF1/CCL21/SPN/PTK2B/CCL20/CCR6/XCL2/XCL1/RIPOR2/CD200R1/TNFSF14/CXCL13/OXSR1/STK10/TNFRSF14/PYCARD/IL27RA	46
GO:0070482	BP	GO:0070482	response to oxygen levels	152/5405	337/18903	6.06845e-11	1.77861e-09	1.12194e-09	PLOD1/PINK1/TGFBR3/ADAM15/LMNA/CD34/ROCK2/PRKCE/EPAS1/EPHA4/TGFBR2/RHOA/VEGFC/ITGA2/PAM/STC2/EDN1/SLC29A1/AQP1/CAV1/VEGFD/ANGPT2/LOXL2/STC1/SFRP1/MYC/NDRG1/NOTCH1/CXCL12/PLAU/PDLIM1/ACVRL1/MMP14/PGF/THBS1/PML/MMP2/CYBA/ACE/WTIP/ACTN4/HIF1A/PPARG/EGLN2/CXCR4/EGLN1/GUCY1B1/BNIP2/ANGPTL4/AKT1/SMAD3/UCP2/ADM/PDGFRB/SRF/CYGB/SLC7A5/TP53/FOXO1/DDAH1/CAPN2/HMOX2/NDUFS2/HDAC2/BAD/GUCY1A1/FOS/NR4A2/PRKAA1…	152
GO:2001056	BP	GO:2001056	positive regulation of cysteine-type endopeptidase activity	78/5405	143/18903	6.17259e-11	1.80094e-09	1.13603e-09	BOK/RHOA/ROBO1/TNFSF10/F2R/NOD1/HIP1/FIS1/BEX3/SOX7/DLC1/ASPH/MYC/GSN/UACA/PML/CARD8/PPM1F/IFI16/HMGB1/LGALS9/BCAP31/PPARG/HIP1R/MTCH1/SMAD3/NGFR/PDCD6/LAPTM5/NLRP1/PDCD5/BAD/SNCA/DAP/CTSH/LCK/HTRA2/CASP10/HSF1/BAX/VCP/BCL10/TNF/CYFIP2/NDUFA13/SYK/HSPD1/HSPE1/PMAIP1/FYN/S100A9/RPS27L/ATP2A3/CTSD/CYCS/P2RX1/PERP/NLRP3/FASLG/S100A8/EIF2AK3/AIM2/BCL2L11/CASP8/CLEC7A/F3/TNFSF15/PRR7/CASP1/FAM162A/FAS…	78
GO:1990868	BP	GO:1990868	response to chemokine	59/5405	98/18903	6.50645e-11	1.88133e-09	1.18673e-09	ACKR1/ACKR3/RHOA/ROBO1/FOXC1/EDN1/CXCL12/SH2B3/CX3CL1/CCL2/CCL14/CCL23/LRCH1/HIF1A/CXCR4/WBP1L/CCL4/SLC12A2/CCL5/SLIT3/WNK1/CCL3/LOX/DOCK8/CCL21/CXCL11/PTK2B/CCL20/CXCR6/CXCR3/CCR7/CCL3L1/CXCL2/CCR10/CCR6/TREM2/XCL2/TFF2/GPR35/XCL1/RIPOR2/CXCL8/CCR5/CCR1/LYN/CXCL13/CXCR5/CIB1/CXCL5/OXSR1/CCL18/CCL24/ZC3H12A/CXCL1/DUSP1/CXCL3/CCRL2/RNF113A/CCL11	59
GO:1990869	BP	GO:1990869	cellular response to chemokine	59/5405	98/18903	6.50645e-11	1.88133e-09	1.18673e-09	ACKR1/ACKR3/RHOA/ROBO1/FOXC1/EDN1/CXCL12/SH2B3/CX3CL1/CCL2/CCL14/CCL23/LRCH1/HIF1A/CXCR4/WBP1L/CCL4/SLC12A2/CCL5/SLIT3/WNK1/CCL3/LOX/DOCK8/CCL21/CXCL11/PTK2B/CCL20/CXCR6/CXCR3/CCR7/CCL3L1/CXCL2/CCR10/CCR6/TREM2/XCL2/TFF2/GPR35/XCL1/RIPOR2/CXCL8/CCR5/CCR1/LYN/CXCL13/CXCR5/CIB1/CXCL5/OXSR1/CCL18/CCL24/ZC3H12A/CXCL1/DUSP1/CXCL3/CCRL2/RNF113A/CCL11	59
GO:0043434	BP	GO:0043434	response to peptide hormone	182/5405	421/18903	6.70804e-11	1.93096e-09	1.21804e-09	C1QTNF12/ALPL/PIK3R3/LEPROT/TGFBR3/RAB13/SHC1/NUCKS1/ROCK2/INHBB/IGFBP5/DAG1/GNAI2/TNFSF10/MAP1B/STC2/EDN1/KBTBD2/GRB10/GNAI1/PDK4/CAV2/CAV1/PTK2/ASS1/PIK3C2A/CXCL12/LRP6/TNS2/SOCS2/PXN/KL/CYFIP1/FBN1/BCAR1/CYBA/CRK/MYO1C/PIP4K2B/SOCS3/PLCB1/INSR/SOGA1/CYP1B1/EDNRB/CDO1/YWHAG/PPARG/TIMP1/TBC1D4/ADCY6/STAT6/PIK3CA/APPL1/SLC27A1/IGF1R/AKT1/AHCYL1/UCP2/ADM/MZB1/BSG/ZNF106/PRKDC/GSK3A/FOXO1/APC/NCK1/…	182
GO:0009141	BP	GO:0009141	nucleoside triphosphate metabolic process	126/5405	267/18903	7.20801e-11	2.06566e-09	1.30301e-09	PINK1/UCK2/RHOA/ZBTB20/NDUFC1/NT5E/FIS1/GIMAP7/NDUFA8/AK1/SLC25A25/ARL2/NDUFA12/NME4/GIT1/NME2/INSR/APP/ATP5PF/TSPO/HIF1A/NUDT16/NDUFB2/DUT/HK1/NME1/ATP5F1E/SLC25A13/AK2/NME3/NDUFB1/PFKM/DCTPP1/ATP5F1C/FOXK1/JMJD8/NDUFC2/NDUFB6/NDUFS2/BAD/NDUFS4/PRKAA1/NDUFA11/ATP5ME/NDUFB3/DTYMK/ATP5MC1/ZBTB7A/STAT3/NDUFB4/ATP5PD/PFKL/ATP5PO/AK3/NDUFAB1/NUDT5/SAMHD1/SDHD/UQCC3/NDUFS6/NDUFB10/DNM1L/MTOR/GALK1/UCK…	126
GO:0010594	BP	GO:0010594	regulation of endothelial cell migration	112/5405	230/18903	7.51946e-11	2.12656e-09	1.34142e-09	EPHA2/PLPP3/EFNA1/AKT3/ROCK2/RHOB/ATOH8/BMPR2/NRP2/RHOA/ADAMTS9/GATA2/KDR/VEGFC/PLK2/MEF2C/SPARC/FLT4/EDN1/SASH1/RAC1/MEOX2/BMPER/HSPB1/NOS3/ANGPT2/STC1/ADGRA2/FGFR1/PTK2/TEK/KLF4/DAB2IP/ABL1/NOTCH1/PIK3C2A/PRCP/ETS1/JCAD/NRP1/MMRN2/HDAC7/ACVRL1/STARD13/RHOJ/VASH1/THBS1/DLL4/NR2F2/EMP2/BCAR1/JUP/GRN/MAP3K3/PTPRM/RIN2/PLCG1/CD40/TBXA2R/FUT1/RRAS/CARD10/PDGFB/HMGB1/SVBP/SPRED1/ATP2B4/SCARB1/HIF1A/P…	112
GO:0050817	BP	GO:0050817	coagulation	112/5405	230/18903	7.51946e-11	2.12656e-09	1.34142e-09	PEAR1/SELP/CSRP1/CD34/FAP/TFPI/PROS1/PLSCR1/MMRN1/ITGA2/IL6ST/F2R/EDN1/HSPB1/CD36/SERPINE1/CAV1/NOS3/DMTN/FZD6/GNAQ/STXBP1/CD59/SERPING1/ST3GAL4/PLAU/VCL/ENTPD1/VWF/CD9/ANO6/SH2B3/DGKH/GAS6/THBS1/ANXA2/ADAMTS18/ACTG1/MYL12A/THBD/PROCR/MYL9/CD40/GNAS/TBXA2R/F2RL3/MYH9/PDGFB/F8/VKORC1/PPIA/ILK/F10/TLR4/PIK3CA/FLNA/F11R/CLIC1/SRF/ANXA5/DGKZ/WAS/GNA12/C1QTNF1/FUNDC2/IL6/COMP/DGKE/MAPK14/TLN1/PLEK/AK3…	112
GO:0050920	BP	GO:0050920	regulation of chemotaxis	112/5405	230/18903	7.51946e-11	2.12656e-09	1.34142e-09	S1PR1/SEMA6C/SEMA4C/BMPR2/SEMA3F/SEMA3G/ROBO1/KDR/VEGFC/ITGA2/SEMA6A/EDN1/RAC1/HSPB1/SERPINE1/VEGFD/ANGPT2/MTUS1/ADGRA2/FGFR1/PTK2/NOTCH1/SWAP70/PDGFD/JAM3/NRP1/CXCL12/ANO6/EFNB2/GAS6/PGF/THBS1/MAPK3/CDH13/CCL2/MMP28/SEMA6B/NOVA2/PPM1F/RAC2/PDGFB/LBP/HMGB1/LGALS9/NEDD9/CXCR4/RYK/MET/ZNF580/PRKD2/ADAM10/TPBG/SMAD3/MEGF8/PDGFRB/CCL4/GPR183/CCL5/DUSP3/C1QBP/GPSM3/ADAM17/IL6/CALR/SMOC2/WNK1/DNM1L/CCL…	112
GO:0045582	BP	GO:0045582	positive regulation of T cell differentiation	67/5405	117/18903	7.87555e-11	2.21754e-09	1.39881e-09	PTPRC/SOX13/HLX/ITPKB/TGFBR2/RHOA/LEF1/SOX4/ZBTB16/ZMIZ1/LGALS9/RHOH/PNP/CD46/CD27/STAT5B/SOCS5/IL4R/BAD/IL2RG/SMARCA4/PHF10/SMARCE1/SMARCC2/RUNX3/EGR3/SMARCA2/SMARCD1/SMARCD2/ARID1B/ANXA1/HLA-DRA/BRD7/XBP1/ARID1A/SASH3/ACTL6A/IL7R/NCKAP1L/ADAM8/ZAP70/SOCS1/VSIR/SYK/CD86/IL18/CD83/GATA3/LILRB4/IFNG/LILRB2/TNFSF9/IL12RB1/RASGRP1/NFKBID/NLRP3/IL2RA/DUSP10/IL4I1/TESPA1/IL23A/FOXP3/ZBTB1/RUNX1/RIPK2/…	67
GO:0006809	BP	GO:0006809	nitric oxide biosynthetic process	49/5405	76/18903	8.41344e-11	2.35869e-09	1.48785e-09	CD34/ROCK2/EDN1/DDAH2/RAC1/CD36/CAV1/NOS3/KLF4/ASS1/NQO1/INSR/CYB5R3/CYP1B1/TSPO/SPR/ATP2B4/TLR4/PKD2/KLF2/HSP90AA1/AKT1/SMAD3/CLU/DDAH1/ASL/KHSRP/ACP5/CYB5B/AIF1/TNF/HBB/IL1B/PTK2B/IFNG/GLA/SOD2/IL10/GCHFR/P2RX4/CLEC7A/PTX3/ZC3H12A/ARG2/HSP90AB1/PTGS2/GCH1/RORA/CD47	49
GO:0002703	BP	GO:0002703	regulation of leukocyte mediated immunity	116/5405	241/18903	8.75428e-11	2.44362e-09	1.54142e-09	PTPRC/GATA2/STXBP1/CD81/FES/CRK/CD40/PVR/NECTIN2/BCR/RAC2/HMGB1/LGALS9/DNASE1L3/VAMP8/ICAM1/TRPM4/STAT6/TLR4/CD46/TAP2/ITGB2/MICA/LAMP1/IL1R1/AHR/DDX1/WAS/STAT5B/IL4R/HLA-E/MAVS/IL6/STXBP2/BST2/TYROBP/HLA-DRA/STX4/EXOSC6/DUSP22/SPI1/FCGR2B/SASH3/IL7R/SNX4/CD96/NCKAP1L/PTPN6/NDFIP1/TNF/ARRB2/DDX21/SYK/KLRB1/HSPD1/IL1B/CD300A/LILRB1/VAV1/IL18/KLRD1/CD84/HAVCR2/SH2D1A/CD28/PTAFR/GATA3/BTK/LILRB4/SLA…	116
GO:0009199	BP	GO:0009199	ribonucleoside triphosphate metabolic process	119/5405	249/18903	8.89155e-11	2.47124e-09	1.55884e-09	PINK1/UCK2/RHOA/ZBTB20/NDUFC1/NT5E/FIS1/GIMAP7/NDUFA8/AK1/SLC25A25/ARL2/NDUFA12/NME4/GIT1/NME2/INSR/APP/ATP5PF/TSPO/HIF1A/NDUFB2/HK1/NME1/ATP5F1E/SLC25A13/AK2/NME3/NDUFB1/PFKM/ATP5F1C/FOXK1/JMJD8/NDUFC2/NDUFB6/NDUFS2/BAD/NDUFS4/PRKAA1/NDUFA11/ATP5ME/NDUFB3/ATP5MC1/ZBTB7A/STAT3/NDUFB4/ATP5PD/PFKL/ATP5PO/AK3/NDUFAB1/NUDT5/SDHD/UQCC3/NDUFS6/NDUFB10/DNM1L/MTOR/GALK1/UCKL1/NDUFA10/SDHC/NDUFB7/EIF6/GNA…	119
GO:2000146	BP	GO:2000146	negative regulation of cell motility	168/5405	383/18903	9.23621e-11	2.55601e-09	1.61232e-09	CLIC4/TIE1/ADAM15/RHOB/IGFBP5/EPHA4/RHOA/DAG1/HYAL2/PTPRG/ADAMTS9/ROBO1/PHLDB2/CD200/APOD/LIMCH1/MEF2C/MCTP1/CTNNA1/DPYSL3/GJA1/PTPRK/AFDN/RAC1/MEOX2/HOXA7/IGFBP3/SERPINE1/WASL/ANGPT2/DLC1/STC1/SFRP1/IL33/KLF4/DAB2IP/ENG/NOTCH1/IFITM1/THY1/CXCL12/VCL/MMRN2/ACVRL1/SRGAP1/STARD13/VASH1/THBS1/DLL4/NR2F2/CX3CL1/ADGRG1/CRK/CCL2/MMP28/JUP/PTPRM/PLCB1/JAG1/TBXA2R/SIN3B/RRAS/CLDN5/BCR/CARD10/ADARB1/SFRP2…	168
GO:0050678	BP	GO:0050678	regulation of epithelial cell proliferation	179/5405	414/18903	9.48902e-11	2.61475e-09	1.64937e-09	TIE1/TGFBR3/LAMC1/HLX/AKT3/RTN4/TACR1/ATOH8/LIMS2/BMPR2/NRP2/CTNNB1/HYAL1/ROBO1/GATA2/HES1/KDR/VEGFC/DAB2/MEF2C/SPARC/FLT4/CD109/PTPRK/LAMB1/CAV2/CAV1/VEGFD/APLN/FGFR1/SFRP1/MYC/NFIB/TEK/KLF9/DAB2IP/NOTCH1/EGFL7/APLNR/CCND1/JCAD/ZEB1/NRP1/CXCL12/MMRN2/NKX2-3/TCF7L2/HTRA1/ACVRL1/FLT1/EFNB2/SAV1/PGF/VASH1/THBS1/DLL4/NR2F2/CDH13/CYBA/CCL2/GRN/NME2/PTPRM/JAG1/ID1/PLCG1/LAMA5/FUT1/PDGFB/SFRP2/STK3/HMG…	179
GO:0051495	BP	GO:0051495	positive regulation of cytoskeleton organization	98/5405	195/18903	1.24241e-10	3.3968e-09	2.14269e-09	WASF2/RHOC/S100A10/NES/ROCK2/PRKCE/TACR1/NCKAP1/RHOA/LIMCH1/MAP1B/SYNPO/EDN1/RAC1/WASL/SORBS3/SFRP1/TEK/GSN/ABL1/SWAP70/ARL2/CDC42EP2/CTTN/NRP1/RAPGEF3/PXN/FERMT2/CYFIP1/FES/CX3CL1/FHOD1/ARHGEF15/GIT1/CSF3/CDC42EP4/DSTN/ID1/CDC42EP5/PPM1F/CDC42EP1/DCTN1/TPM1/ITGB1BP1/KIRREL1/BRK1/MET/NUMA1/SMAD3/HRAS/WAS/NCK1/ABI2/DYNC1H1/RGCC/SYNPO2/PFDN2/KATNBL1/CDC42EP3/CFL2/GPR65/PLEK/MTOR/CDK5/WDR1/BAIAP2/MT…	98
GO:0050866	BP	GO:0050866	negative regulation of cell activation	108/5405	221/18903	1.24851e-10	3.3968e-09	2.14269e-09	PTPRC/HLX/CD200/ADGRF5/NOS3/SFRP1/LRRC32/CD9/SH2B3/CX3CL1/ADAMTS18/GRN/THBD/ZBTB46/LDLR/BCR/PDGFB/HMGB1/LGALS9/SAMSN1/PKN1/MICA/TNFAIP3/CYGB/RC3H2/LAPTM5/CST7/TWSG1/SOCS5/IL4R/DUSP3/C1QTNF1/PRKAR1A/RUNX3/RASSF5/PRDX2/NRARP/PTEN/TYROBP/ANXA1/TBC1D10C/PTPN22/RHBDD3/DUSP22/SPI1/FCGR2B/NR1D1/GAL/NCKAP1L/PTPN6/NDFIP1/SOCS1/VSIR/TIGIT/SPN/CD86/LST1/CD300A/LILRB1/HMGB3/CD84/HAVCR2/LAX1/BTK/LILRB4/TNFRSF…	108
GO:0051607	BP	GO:0051607	defense response to virus	139/5405	304/18903	1.24851e-10	3.3968e-09	2.14269e-09	FCN3/IFI44L/PTPRC/CHMP3/HYAL2/PLSCR1/TSPAN6/IL33/IFITM2/IFITM1/IFITM3/HTRA1/IFI27/PML/TBKBP1/SEC14L1/CD40/CARD8/ADARB1/IFI16/TRAF3IP2/VAMP8/SERINC3/MLKL/ISG20/PCBP2/TRIM56/HSP90AA1/ABCC9/IFIT3/MICA/TNFAIP3/ZNFX1/ZDHHC1/GBP1/TRIM44/TRIM8/BIRC3/ZMYND11/IFIT1/TRIM5/DDX1/NLRP1/MOV10/PUM1/CCDC92/OAS2/BECN1/TRIM28/C1QBP/G3BP1/SELENOK/ANKRD17/MAVS/OAS3/IL6/UFD1/TRIM25/ARMC5/DHX15/IFI6/NPLOC4/ZMPSTE24/BS…	139
GO:0030183	BP	GO:0030183	B cell differentiation	81/5405	152/18903	1.25911e-10	3.41125e-09	2.1518e-09	PIK3R3/PTPRC/DLL1/ITM2A/SFRP1/LRRC8A/ABL1/ITGB1/HHEX/NKX2-3/MMP14/LYL1/TRAF3IP2/MFNG/PRKDC/CD79A/TP53/LGALS1/CD27/STAT5B/PHF14/BAD/GPR183/IL2RG/ADAM17/IL6/ZBTB7A/POU2AF1/ZFP36L1/HDAC5/IRF2BP2/ITGA4/VCAM1/TPD52/SLC39A7/YY1/CEBPG/XBP1/SPI1/FCGR2B/ZFP36L2/IKZF3/BAX/NCKAP1L/PTPN6/CD79B/BLNK/SYK/DOCK10/HMGB3/PTK2B/DNAJB9/BTK/CD19/IRF8/BCL2/PIK3CD/CARD11/IL4I1/INHBA/MS4A1/IL10/KLF6/ZBTB1/CD40LG/RBPJ/FN…	81
GO:0030832	BP	GO:0030832	regulation of actin filament length	85/5405	162/18903	1.26933e-10	3.42452e-09	2.16017e-09	PRKCE/SPTBN1/TMSB10/NCKAP1/RHOA/ADD1/DBN1/ELN/DMTN/GSN/SPTAN1/SWAP70/CDC42EP2/CTTN/RDX/ESAM/SVIL/CXCL12/LIMA1/CYFIP1/SPTBN5/TMOD2/TMOD3/CORO1A/CSF3/CDC42EP4/DSTN/KANK3/CDC42EP5/CDC42EP1/TRIOBP/SSH1/HIP1R/EPS8/KIRREL1/BRK1/PIK3CA/CAPZA2/MTPN/TWF1/WAS/ARPC1A/NCK1/ARHGAP35/ARPC1B/CDC42EP3/PLEKHG2/FLII/CFL2/ARPC5L/ADD3/PLEK/MKKS/MTOR/WDR1/CAPG/RASA1/BAIAP2/ARHGAP18/HCLS1/ARPC4/NCKAP1L/TWF2/MLST8/CCL2…	85
GO:0001666	BP	GO:0001666	response to hypoxia	136/5405	296/18903	1.31097e-10	3.52213e-09	2.22174e-09	PLOD1/PINK1/TGFBR3/ADAM15/LMNA/CD34/ROCK2/PRKCE/EPAS1/EPHA4/TGFBR2/RHOA/VEGFC/ITGA2/PAM/STC2/EDN1/SLC29A1/AQP1/CAV1/VEGFD/ANGPT2/LOXL2/STC1/SFRP1/MYC/NDRG1/NOTCH1/CXCL12/PLAU/PDLIM1/ACVRL1/MMP14/PGF/THBS1/PML/MMP2/CYBA/ACE/WTIP/ACTN4/HIF1A/PPARG/EGLN2/CXCR4/EGLN1/ANGPTL4/SMAD3/UCP2/ADM/SRF/CYGB/TP53/DDAH1/CAPN2/HMOX2/BAD/FOS/NR4A2/PRKAA1/BECN1/RGCC/CD38/ADAM17/AGTRAP/TXN2/ZFP36L1/CARD16/ALKBH5/SD…	136
GO:0007179	BP	GO:0007179	transforming growth factor beta receptor signaling pathway	106/5405	216/18903	1.35302e-10	3.62003e-09	2.2835e-09	TGFBR3/TGFBR2/SPRY1/SMAD1/DAB2/NREP/SMAD5/CD109/PTPRK/CAV2/CAV1/PTK2/ENG/ADAMTSL2/LTBP3/LRRC32/ZEB1/ZMIZ1/HTRA1/ACVRL1/PXN/LATS2/SMAD9/FERMT2/THBS1/FBN1/SMAD6/PML/TGFB1I1/CDH5/SMURF2/FKBP1A/ID1/CLDN5/LTBP1/SPRED1/PMEPA1/PPARG/CDKN1C/SPRED2/HDAC1/SKI/NLK/HTRA3/APPL1/FURIN/SMAD3/GIPC1/TP53/SMAD2/TWSG1/GLG1/HDAC2/ZFYVE9/ASPN/FOS/ZYX/SAP30L/BCL9L/ADAM17/ZBTB7A/LRG1/LPXN/STAT3/ITGA3/ADAM9/SMAD4/LTBP2/…	106
GO:0034599	BP	GO:0034599	cellular response to oxidative stress	133/5405	288/18903	1.36793e-10	3.64479e-09	2.29912e-09	PINK1/SELENON/RHOB/EPAS1/STK25/CTNNB1/GPX8/EDN1/NCOA7/PTPRK/AQP1/HSPB1/CD36/NOS3/ABL1/IL18BP/PDGFD/AKR1C3/PLEKHA1/MGMT/PXN/PML/PDE8A/MAPK3/MMP2/NQO1/PCGF2/NFE2L1/MAP1LC3A/AGAP3/CYP1B1/PRDX1/ATP13A2/TPM1/PPIA/HIF1A/MPV17/NET1/CAMKK2/SPHK1/STAT6/TLR4/PKD2/MET/STX2/ZNF580/KLF2/ATP2A2/AKT1/TNFAIP3/ROMO1/GPX7/NCF1/FOXP1/TP53/FOXO1/FBLN5/HDAC2/SNCA/ERMP1/FOS/NR4A2/PRKAA1/MSRA/BECN1/KEAP1/IL6/RWDD1/PARK…	133
GO:0002690	BP	GO:0002690	positive regulation of leukocyte chemotaxis	58/5405	97/18903	1.38562e-10	3.67675e-09	2.31928e-09	VEGFC/EDN1/RAC1/SERPINE1/VEGFD/PTK2/SWAP70/CXCL12/ANO6/GAS6/PGF/THBS1/MAPK3/RAC2/LBP/HMGB1/LGALS9/NEDD9/ZNF580/ADAM10/CCL4/CCL5/C1QBP/GPSM3/ADAM17/IL6/CALR/WNK1/DNM1L/CCL3/SPI1/NCKAP1L/AIF1/CCL21/PTN/RARRES2/PTK2B/CCR7/SLAMF1/CSF1R/C3AR1/C5AR1/CCR6/XCL2/XCL1/RIPOR2/VEGFA/CXCL8/CCR1/IL23A/TNFSF14/PLA2G7/CXCL13/OXSR1/CXCL17/IL6R/S100A14/AKIRIN1	58
GO:0018212	BP	GO:0018212	peptidyl-tyrosine modification	167/5405	382/18903	1.44104e-10	3.80812e-09	2.40215e-09	EPHA2/TIE1/PLPP3/SHC1/EFNA1/ABL2/PTPRC/PRKCE/EPHA4/SH3BP5/HYAL2/HES1/KDR/IL6ST/HBEGF/FLT4/CD36/EPHB4/CAV1/BMX/DMTN/FGFR1/SFRP1/ENPP2/PTK2/TEK/NTRK2/ABL1/CD81/HIPK3/CD44/NOX4/PDGFD/THY1/NRP1/TNFRSF1A/ITGA5/KITLG/SH2B3/FLT1/GAS6/EHD4/PEAK1/FES/GPRC5B/MAPK3/CSF3/ACE/PECAM1/SOCS3/YES1/CD40/INSR/BCR/PDGFB/APP/SFRP2/NEDD9/SAMSN1/CAMKK2/ARL2BP/TPST1/MET/CD3E/IGF1R/ITGB2/TNK2/PDGFRB/PPP2R5B/NCF1/TP53/DLG…	167
GO:0045088	BP	GO:0045088	regulation of innate immune response	115/5405	240/18903	1.49579e-10	3.93668e-09	2.48324e-09	FCN3/CFH/PLSCR1/SERPING1/A2M/CRK/GRN/CDC37/PVR/NECTIN2/LBP/IFI16/HMGB1/LGALS9/PPARG/TRIM56/TLR4/BANF1/APPL1/HSP90AA1/MICA/TNFAIP3/LAMP1/ZNFX1/BIRC3/PRKDC/NCF1/TRIM5/STAT5B/PTPN11/CCL5/HLA-E/MAVS/OAS3/IRAK3/METTL3/SAMHD1/PARP9/TYROBP/NMI/XRCC5/PARP14/PTPN22/SPI1/FCGR2B/DHX9/ADAR/ZBP1/YTHDF2/COLEC11/NONO/FAM3A/CD96/PAK2/LSM14A/ADAM8/PTPN6/SOCS1/ARRB2/BIRC2/SYK/CNOT7/UBE2K/POLR3D/KLRB1/ISG15/GBP5/LI…	115
GO:0043547	BP	GO:0043547	positive regulation of GTPase activity	131/5405	283/18903	1.5458e-10	4.05176e-09	2.55583e-09	AGRN/EPHA2/ASAP3/ARHGAP29/S1PR1/S100A10/RGL1/RGS1/SIPA1L2/ASAP2/RASGRP3/MAP4K4/PKP4/ITGA6/RAPGEF4/CHN1/IQSEC1/F2R/RASGRF2/ARAP3/RGL2/AFDN/RAPGEF5/CAV2/SFRP1/ASAP1/PICALM/THY1/RSU1/ITGB1/RAPGEF3/DOCK9/ARHGEF7/FERMT2/CX3CL1/CRK/TAX1BP3/ARHGEF15/CCL2/CCL14/CCL23/TBC1D16/RALGAPA2/TGM2/CD40/DOCK6/BCR/AGAP3/NEDD9/SRGAP2/RALBP1/MYO9A/NET1/SOS1/TBC1D4/RCC2/TBC1D1/F11R/RABGAP1/HRAS/TBC1D9B/TBC1D9/CCL4/RGS…	131
GO:0040013	BP	GO:0040013	negative regulation of locomotion	180/5405	419/18903	1.58252e-10	4.13122e-09	2.60595e-09	CLIC4/TIE1/SEMA6C/ADAM15/RHOB/SEMA4C/IGFBP5/EPHA4/RHOA/DAG1/SEMA3F/HYAL2/SEMA3G/PTPRG/ADAMTS9/ROBO1/PHLDB2/CD200/APOD/LIMCH1/MEF2C/MCTP1/SEMA6A/CTNNA1/DPYSL3/GJA1/PTPRK/AFDN/RAC1/MEOX2/HOXA7/IGFBP3/SERPINE1/WASL/ANGPT2/DLC1/STC1/SFRP1/IL33/KLF4/DAB2IP/ENG/NOTCH1/IFITM1/THY1/NRP1/CXCL12/VCL/MMRN2/ACVRL1/SRGAP1/STARD13/VASH1/THBS1/DLL4/NR2F2/CX3CL1/ADGRG1/CRK/CCL2/MMP28/JUP/PTPRM/PLCB1/JAG1/TBXA2R/…	180
GO:0140546	BP	GO:0140546	defense response to symbiont	139/5405	305/18903	1.65298e-10	4.26637e-09	2.6912e-09	FCN3/IFI44L/PTPRC/CHMP3/HYAL2/PLSCR1/TSPAN6/IL33/IFITM2/IFITM1/IFITM3/HTRA1/IFI27/PML/TBKBP1/SEC14L1/CD40/CARD8/ADARB1/IFI16/TRAF3IP2/VAMP8/SERINC3/MLKL/ISG20/PCBP2/TRIM56/HSP90AA1/ABCC9/IFIT3/MICA/TNFAIP3/ZNFX1/ZDHHC1/GBP1/TRIM44/TRIM8/BIRC3/ZMYND11/IFIT1/TRIM5/DDX1/NLRP1/MOV10/PUM1/CCDC92/OAS2/BECN1/TRIM28/C1QBP/G3BP1/SELENOK/ANKRD17/MAVS/OAS3/IL6/UFD1/TRIM25/ARMC5/DHX15/IFI6/NPLOC4/ZMPSTE24/BS…	139
GO:0051893	BP	GO:0051893	regulation of focal adhesion assembly	43/5405	64/18903	1.65414e-10	4.26637e-09	2.6912e-09	MACF1/S100A10/ROCK2/MAP4K4/RHOA/FAM107A/PHLDB2/APOD/LIMCH1/KDR/RAC1/DLC1/DMTN/SFRP1/PTK2/TEK/ABL1/THY1/NRP1/VCL/ACVRL1/MMP14/FERMT2/THBS1/PEAK1/ACTG1/DAPK3/PPM1F/SLK/ITGB1BP1/RCC2/SMAD3/DUSP3/PTPRA/TLN1/PTEN/DUSP22/CORO1C/LIMS1/POLDIP2/VEGFA/SDC4/PTPRJ	43
GO:0090109	BP	GO:0090109	regulation of cell-substrate junction assembly	43/5405	64/18903	1.65414e-10	4.26637e-09	2.6912e-09	MACF1/S100A10/ROCK2/MAP4K4/RHOA/FAM107A/PHLDB2/APOD/LIMCH1/KDR/RAC1/DLC1/DMTN/SFRP1/PTK2/TEK/ABL1/THY1/NRP1/VCL/ACVRL1/MMP14/FERMT2/THBS1/PEAK1/ACTG1/DAPK3/PPM1F/SLK/ITGB1BP1/RCC2/SMAD3/DUSP3/PTPRA/TLN1/PTEN/DUSP22/CORO1C/LIMS1/POLDIP2/VEGFA/SDC4/PTPRJ	43
GO:0043368	BP	GO:0043368	positive T cell selection	30/5405	38/18903	1.71289e-10	4.40028e-09	2.77567e-09	PTPRC/ITPKB/CTSL/STAT6/CD3E/SRF/CD3D/IL6/STAT3/IRF4/MTOR/STK11/CD3G/LY9/DOCK2/ZAP70/SPN/BATF/TOX/IL12RB1/BCL11B/THEMIS/BCL2/SLAMF6/TBX21/IL23A/FOXP3/IL6R/PTPN2/BRAF	30
GO:0018108	BP	GO:0018108	peptidyl-tyrosine phosphorylation	166/5405	380/18903	1.75488e-10	4.49025e-09	2.83243e-09	EPHA2/TIE1/PLPP3/SHC1/EFNA1/ABL2/PTPRC/PRKCE/EPHA4/SH3BP5/HYAL2/HES1/KDR/IL6ST/HBEGF/FLT4/CD36/EPHB4/CAV1/BMX/DMTN/FGFR1/SFRP1/ENPP2/PTK2/TEK/NTRK2/ABL1/CD81/HIPK3/CD44/NOX4/PDGFD/THY1/NRP1/TNFRSF1A/ITGA5/KITLG/SH2B3/FLT1/GAS6/EHD4/PEAK1/FES/GPRC5B/MAPK3/CSF3/ACE/PECAM1/SOCS3/YES1/CD40/INSR/BCR/PDGFB/APP/SFRP2/NEDD9/SAMSN1/CAMKK2/ARL2BP/MET/CD3E/IGF1R/ITGB2/TNK2/PDGFRB/PPP2R5B/NCF1/TP53/DLG4/HDAC…	166
GO:0031098	BP	GO:0031098	stress-activated protein kinase signaling cascade	117/5405	246/18903	1.86112e-10	4.74327e-09	2.99203e-09	PINK1/SEMA4C/MAP4K4/SH3RF3/STK25/RHOA/MECOM/FLT4/TPD52L1/SASH1/EZR/NOD1/MID1/SFRP1/MYC/DAB2IP/SH2D3C/HIPK3/MAP3K11/DIXDC1/LTBR/HACD3/TAOK2/MAPK3/CRK/MAP3K3/PLCB1/CDC42EP5/MAPK11/APP/SFRP2/STK3/HMGB1/LGALS9/RAP2A/PRDX1/PRMT1/AIDA/PPIA/RELL1/MAP3K12/SPHK1/TLR4/TAOK1/MINK1/IGF1R/SMAD3/HRAS/ZMYND11/NCF1/FOXO1/MAP3K20/CD27/MAP3K13/KLHDC10/IGFBP6/DUSP3/ZFP36L1/NBR1/COPS5/MAPK14/ZMPSTE24/EIF2AK2/PTPN22/…	117
GO:0046034	BP	GO:0046034	ATP metabolic process	106/5405	217/18903	1.90662e-10	4.84011e-09	3.05312e-09	PINK1/ZBTB20/NDUFC1/NT5E/FIS1/NDUFA8/AK1/SLC25A25/ARL2/NDUFA12/GIT1/INSR/APP/ATP5PF/TSPO/HIF1A/NDUFB2/HK1/ATP5F1E/SLC25A13/AK2/NDUFB1/PFKM/ATP5F1C/FOXK1/JMJD8/NDUFC2/NDUFB6/NDUFS2/BAD/NDUFS4/PRKAA1/NDUFA11/ATP5ME/NDUFB3/ATP5MC1/ZBTB7A/STAT3/NDUFB4/ATP5PD/PFKL/ATP5PO/NDUFAB1/NUDT5/SDHD/UQCC3/NDUFS6/NDUFB10/DNM1L/MTOR/GALK1/NDUFA10/SDHC/NDUFB7/EIF6/NADK/NDUFB5/NDUFB8/ATP6V1A/VCP/NDUFA1/PFKP/NDUFA7/…	106
GO:0019646	BP	GO:0019646	aerobic electron transport chain	56/5405	93/18903	1.95886e-10	4.95322e-09	3.12447e-09	PINK1/NDUFC1/NDUFA8/COX7A1/NDUFB2/COX6C/NDUFB1/COX5B/UQCRQ/COX4I2/UQCR11/NDUFC2/NDUFB6/NDUFS2/SNCA/NDUFS4/NDUFB3/PARK7/NDUFB4/DNAJC15/NDUFAB1/SDHD/SDHAF2/NDUFA4/UQCC3/NDUFS6/NDUFB10/COQ9/NDUFA10/SDHC/NDUFB7/NDUFB5/NDUFB8/COX6A1/NDUFA1/NDUFA7/NDUFS8/NDUFB9/NDUFS5/NDUFS3/COX7A2L/NDUFA3/NDUFA2/NDUFA6/COX7A2/NDUFA9/COX7B/COX5A/NDUFV3/COX4I1/NDUFS7/COX6B1/CYCS/COX8A/UQCRB/UQCRFS1	56
GO:0001776	BP	GO:0001776	leukocyte homeostasis	59/5405	100/18903	2.04748e-10	5.1571e-09	3.25308e-09	ITPKB/F2R/MEF2C/ABL1/JAM3/NKX2-3/KITLG/SH2B3/CORO1A/SPNS2/HMGB1/LGALS9/TRAF3IP2/HIF1A/PKN1/SOS1/AKT1/TNFAIP3/RC3H2/STAT5B/GPR183/ADAM17/IL6/PDE4B/TNFRSF17/PRDX2/BAP1/ANXA1/SLC39A3/SASH3/IL7R/CAMLG/BAX/TSC22D3/NCKAP1L/BCL10/LAT/SLC40A1/DOCK10/SIT1/PMAIP1/BTK/TNFRSF13B/RPS6/GPR174/BCL2/PIK3CD/IL2RA/FOXP3/LGALS2/HCAR2/BCL2L11/TNFSF14/SKIL/LYN/FAS/DOCK11/TNFSF13B/BAK1	59
GO:2000403	BP	GO:2000403	positive regulation of lymphocyte migration	32/5405	42/18903	2.18222e-10	5.4601e-09	3.44421e-09	ABL2/RHOA/ABL1/CXCL12/CORO1A/MADCAM1/JAM2/APP/NEDD9/CD99L2/ADAM10/CCL4/CCL5/SELENOK/ADAM17/ITGA4/WNK1/CCL3/DOCK8/ADAM8/AIF1/CCL21/SPN/PTK2B/CCL20/XCL2/XCL1/TNFSF14/CXCL13/OXSR1/TNFRSF14/PYCARD	32
GO:0071496	BP	GO:0071496	cellular response to external stimulus	147/5405	328/18903	2.18472e-10	5.4601e-09	3.44421e-09	CDA/PTPRC/PIK3C2B/RALB/INHBB/BMPR2/DAG1/FAM107A/TMEM150C/ITGA2/AQP1/UPP1/PDK4/TNFRSF10B/SFRP1/PLEC/IL33/ENG/PDE2A/AKR1C3/TNFRSF1A/LTBR/NUAK1/GAS6/KIF26A/FES/MAPK3/RIPOR1/GABARAPL2/CYBA/PIEZO1/PPP1R9B/MAP1LC3A/CD40/KANK2/GAS2L1/SFRP2/IFI16/RXRA/SNAI2/POSTN/KLF10/RRAGA/COMT/TLR4/F11R/FADS1/IGF1R/DCTPP1/UCP2/SRF/GSDMD/SLC7A5/SH3GLB1/MTPN/PPM1D/TP53/FOXO1/EIF4G1/BAD/ARHGAP35/FOS/NR4A2/PRKAA1/BECN1/MY…	147
GO:0036293	BP	GO:0036293	response to decreased oxygen levels	140/5405	309/18903	2.34425e-10	5.83619e-09	3.68144e-09	PLOD1/PINK1/TGFBR3/ADAM15/LMNA/CD34/ROCK2/PRKCE/EPAS1/EPHA4/TGFBR2/RHOA/VEGFC/ITGA2/PAM/STC2/EDN1/SLC29A1/AQP1/CAV1/VEGFD/ANGPT2/LOXL2/STC1/SFRP1/MYC/NDRG1/NOTCH1/CXCL12/PLAU/PDLIM1/ACVRL1/MMP14/PGF/THBS1/PML/MMP2/CYBA/ACE/WTIP/ACTN4/HIF1A/PPARG/EGLN2/CXCR4/EGLN1/BNIP2/ANGPTL4/AKT1/SMAD3/UCP2/ADM/SRF/CYGB/TP53/DDAH1/CAPN2/HMOX2/BAD/FOS/NR4A2/PRKAA1/BECN1/RGCC/CD38/EEF2K/ADAM17/AGTRAP/TXN2/ZFP36L1…	140
GO:2001238	BP	GO:2001238	positive regulation of extrinsic apoptotic signaling pathway	36/5405	50/18903	2.47845e-10	6.14656e-09	3.87722e-09	PEA15/PTPRC/HYAL2/TNFSF10/CTNNA1/CAV1/SRPX/SFRP1/LTBR/THBS1/PML/TIMP3/STK3/ITM2C/TNFSF12/STK4/PPP2R1A/PDIA3/PPP2R1B/PTEN/HTRA2/RBCK1/PAK2/BCL10/TNF/PMAIP1/INHBA/CYLD/MAL/SKIL/DEDD2/G0S2/TNFRSF12A/ATF3/PPP1CA/PYCARD	36
GO:0030336	BP	GO:0030336	negative regulation of cell migration	161/5405	368/18903	2.87421e-10	7.10073e-09	4.47911e-09	CLIC4/TIE1/ADAM15/RHOB/IGFBP5/EPHA4/RHOA/DAG1/HYAL2/PTPRG/ADAMTS9/ROBO1/PHLDB2/CD200/APOD/LIMCH1/MEF2C/MCTP1/DPYSL3/GJA1/PTPRK/AFDN/RAC1/MEOX2/HOXA7/IGFBP3/SERPINE1/WASL/ANGPT2/DLC1/STC1/SFRP1/IL33/KLF4/DAB2IP/ENG/NOTCH1/IFITM1/THY1/CXCL12/VCL/MMRN2/ACVRL1/SRGAP1/STARD13/VASH1/THBS1/DLL4/NR2F2/CX3CL1/ADGRG1/CCL2/MMP28/JUP/PTPRM/PLCB1/JAG1/TBXA2R/SIN3B/RRAS/CLDN5/BCR/CARD10/ADARB1/SFRP2/HMGB1/CYP1…	161
GO:0050764	BP	GO:0050764	regulation of phagocytosis	60/5405	103/18903	2.95397e-10	7.26993e-09	4.58584e-09	FCN3/PTPRC/DYSF/ITGAV/GATA2/PLSCR1/ITGA2/SNX3/CD36/ANO6/GAS6/CYBA/CCL2/TGM2/BCR/HMGB1/SCARB1/IL15RA/MFGE8/SPHK1/APPL1/IL2RG/CALR/RAB31/IL15/FCER1G/MYO18A/FCGR2B/DOCK2/COLEC11/NCKAP1L/IL2RB/TNF/SYK/ATG3/IL1B/CD300A/BTK/IFNG/SIRPG/HCK/STAP1/FCGR1A/TREM2/TLR2/FCN1/SLC11A1/CNN2/C3/CLEC7A/PTX3/PTPRJ/CSK/APOA2/SOD1/FGR/PYCARD/RAB27A/CD47/APOA1	60
GO:1904951	BP	GO:1904951	positive regulation of establishment of protein localization	140/5405	310/18903	3.08037e-10	7.55217e-09	4.76388e-09	C1QTNF12/PINK1/LEPROT/WLS/OAZ3/PRKCE/MYRIP/HYAL2/VEGFC/ABLIM3/SOX4/TMEM30A/EZR/FIS1/SYTL4/PTP4A3/STOM/LRRC8A/CD81/FRMD4A/TCF7L2/RAPGEF3/GAS6/OAZ2/RIPOR1/DOC2B/RPH3AL/YWHAE/MYO1C/MYH10/JUP/RAC2/NLGN2/ATP13A2/PRKACA/BCAP31/C1QTNF3/PPIA/HIF1A/PPARG/ITGB1BP1/TRPM4/TLR4/TCAF1/FLNA/HSP90AA1/PFKM/ITGB2/SMAD3/SAE1/RHOU/HRAS/SH3GLB1/GSK3A/PDCD5/BAD/SRI/TARDBP/ABCG1/PRKAA1/OAZ1/TRIM28/UNC13B/IPO5/CD38/CSNK…	140
GO:0051099	BP	GO:0051099	positive regulation of binding	90/5405	177/18903	3.20569e-10	7.82456e-09	4.9357e-09	S100A10/RALB/EPHA4/CTNNB1/PLXND1/HES1/ADD1/ITGA2/FOXC1/FLOT1/CAV1/CLIC2/PPP2CB/CTHRC1/KLF4/ABL1/NRP1/TCF7L2/CTBP2/ANXA2/CSF3/ACE/FKBP1A/CLDN5/APP/EBF2/STK3/HMGB1/PPARG/HIP1R/MFNG/STMN1/SKI/NME1/CALM1/HMBOX1/MET/LARP6/LAMTOR5/EIF4G1/SPPL3/ZNF618/TRIM28/CDK9/RAPGEF2/STK4/AKTIP/PKD1/PARK7/TXN/EIF2S1/TAF1/PARP9/KDM1A/IRF4/KRIT1/PIN1/RB1/CDK5/BMP2/CEBPG/HNRNPL/AMFR/HSF1/USP9X/DHX9/DDRGK1/SIRT2/POLDIP2…	90
GO:0046634	BP	GO:0046634	regulation of alpha-beta T cell activation	65/5405	115/18903	3.21574e-10	7.82456e-09	4.9357e-09	PTPRC/HLX/ITPKB/TGFBR2/RHOA/CD81/ZBTB16/HMGB1/LGALS9/PNP/CD3E/RC3H2/TWSG1/SOCS5/IL4R/IL2RG/HLA-E/RUNX3/IRF4/ANXA1/HLA-DRA/PTPN22/SASH3/NCKAP1L/NDFIP1/ZAP70/SOCS1/VSIR/SYK/CD86/CD300A/LILRB1/BATF/IL18/CD83/CD28/GATA3/LILRB4/IFNG/HSPH1/IL12RB1/CBLB/CRTAM/NFKBID/NLRP3/IL2RA/XCL1/CARD11/ZNF683/TBX21/PRKCQ/IL23A/FOXP3/IRF1/EBI3/PRDM1/RUNX1/RASAL3/CD55/TNFRSF14/ZC3H12A/ARG2/RIPK2/MALT1/NFKBIZ	65
GO:0051222	BP	GO:0051222	positive regulation of protein transport	134/5405	294/18903	3.47935e-10	8.43416e-09	5.32023e-09	C1QTNF12/PINK1/LEPROT/WLS/OAZ3/PRKCE/MYRIP/HYAL2/VEGFC/ABLIM3/SOX4/TMEM30A/EZR/FIS1/SYTL4/STOM/LRRC8A/CD81/FRMD4A/TCF7L2/RAPGEF3/GAS6/OAZ2/RIPOR1/DOC2B/RPH3AL/YWHAE/MYO1C/MYH10/JUP/RAC2/NLGN2/ATP13A2/PRKACA/BCAP31/C1QTNF3/PPIA/HIF1A/PPARG/ITGB1BP1/TRPM4/TLR4/TCAF1/FLNA/HSP90AA1/PFKM/ITGB2/SMAD3/SAE1/RHOU/HRAS/SH3GLB1/GSK3A/PDCD5/BAD/SRI/TARDBP/ABCG1/PRKAA1/OAZ1/TRIM28/UNC13B/IPO5/CD38/CSNK2A2/MAV…	134
GO:0045333	BP	GO:0045333	cellular respiration	114/5405	240/18903	3.49298e-10	8.43548e-09	5.32106e-09	PINK1/RHOA/NDUFC1/PLEC/NDUFA8/SLC25A25/ARL2/ME3/NDUFA12/COX7A1/CISD1/ATP5PF/HIF1A/NDUFB2/COX6C/PIK3CA/ATP5F1E/SLC25A13/NDUFB1/COX5B/ATP5F1C/UQCRQ/COX4I2/UQCR11/NDUFC2/NDUFB6/NDUFS2/SNCA/ACO1/NDUFS4/POLG2/NDUFA11/ETFRF1/MYBBP1A/ATP5ME/NDUFB3/PARK7/TRAP1/NDUFB4/ATP5PD/DNAJC15/ATP5PO/NDUFAB1/SDHD/SDHAF2/NDUFA4/UQCC2/UQCC3/NDUFS6/NDUFB10/PDHB/MTFR1L/COQ9/NR4A3/CAT/CS/ETFB/NDUFA10/DLST/SDHC/NDUFB7/NDU…	114
GO:0050792	BP	GO:0050792	regulation of viral process	84/5405	162/18903	3.536e-10	8.5075e-09	5.36649e-09	FCN3/NR5A2/PLSCR1/SNX3/GSN/STOM/NOTCH1/IFITM2/IFITM1/IFITM3/HACD3/NECTIN2/ADARB1/IFI16/HMGB1/LGALS9/PPIA/CXCR4/ISG20/BANF1/FURIN/ZNFX1/TRIM8/IFIT1/TRIM5/LGALS1/PKN2/CCL5/OAS2/DYNLT1/TRIM28/LARP1/KPNA6/MAVS/OAS3/TRIM25/DDB1/VPS4A/VAPB/BST2/RAD23A/EIF2AK2/UBP1/RSF1/STAU1/INPP5K/TSG101/SRPK2/DHX9/ADAR/TBC1D20/LY6E/SNF8/RAB7A/TRIM13/TNF/MPHOSPH8/CNOT7/ISG15/APOBEC3G/TRIM27/CD28/CD4/APOBEC3C/TRIM22/BC…	84
GO:0015980	BP	GO:0015980	energy derivation by oxidation of organic compounds	148/5405	333/18903	3.92328e-10	9.33862e-09	5.89076e-09	PINK1/LEPR/RHOA/NDUFC1/IL6ST/PCDH12/ADGRF5/MYC/PLEC/NDUFA8/SLC25A25/CAVIN3/ARL2/ME3/NDUFA12/KL/INSR/COX7A1/CISD1/ATP5PF/HIF1A/NDUFB2/PGM2/COX6C/PIK3CA/ATP5F1E/SLC25A13/NDUFB1/PFKM/COX5B/AKT1/ATP5F1C/UQCRQ/GSK3A/COX4I2/TP53/UQCR11/NDUFC2/NDUFB6/NDUFS2/SNCA/ACO1/NDUFS4/POLG2/NDUFA11/ETFRF1/MYBBP1A/ATP5ME/NDUFB3/PHKB/PARK7/TRAP1/NDUFB4/ATP5PD/DNAJC15/ATP5PO/SORBS1/NDUFAB1/SDHD/SDHAF2/NDUFA4/GAA/UQCC…	148
GO:0032623	BP	GO:0032623	interleukin-2 production	42/5405	63/18903	3.92489e-10	9.33862e-09	5.89076e-09	PTPRC/CD34/SPTBN1/EZR/ABL1/HDAC7/PNP/CD3E/PRKD2/TNFAIP3/GBP1/LAPTM5/STAT5B/PDE4B/IRF4/ANXA1/HOMER3/SASH3/STOML2/TRIM27/CD86/IL1B/CD83/HAVCR2/CD28/GATA3/CD4/LILRB4/VSIG4/XCL1/IL1A/CARD11/TBX21/PRKCQ/LAG3/FOXP3/CLEC7A/RUNX1/PDE4D/PRNP/RIPK2/MALT1	42
GO:0032663	BP	GO:0032663	regulation of interleukin-2 production	42/5405	63/18903	3.92489e-10	9.33862e-09	5.89076e-09	PTPRC/CD34/SPTBN1/EZR/ABL1/HDAC7/PNP/CD3E/PRKD2/TNFAIP3/GBP1/LAPTM5/STAT5B/PDE4B/IRF4/ANXA1/HOMER3/SASH3/STOML2/TRIM27/CD86/IL1B/CD83/HAVCR2/CD28/GATA3/CD4/LILRB4/VSIG4/XCL1/IL1A/CARD11/TBX21/PRKCQ/LAG3/FOXP3/CLEC7A/RUNX1/PDE4D/PRNP/RIPK2/MALT1	42
GO:0008037	BP	GO:0008037	cell recognition	110/5405	230/18903	4.28424e-10	1.01562e-08	6.40646e-09	FCN3/PEAR1/RTN4/EPHA4/ROBO1/PCDH12/CD36/MSN/CD81/ROBO3/ROBO4/NRP1/CD9/PECAM1/APP/LBP/NEDD9/EXT1/SCARB1/CXCR4/MFGE8/MEGF8/BSG/NRCAM/ARHGAP35/IGHA1/EMB/TRBC2/CCT7/IGLL5/NPTN/CCT5/UBAP2L/NDN/IGKC/MYO18A/CCT2/IGHA2/DOCK8/NEXN/DOCK2/COLEC11/TRBC1/CD6/CCL21/COLEC12/PRF1/CCT3/IGLC2/IGLC3/CD5/HAVCR2/YWHAZ/IGHG1/CCR7/FCGR1A/CRTAM/TREM2/FOLR2/IGHM/FCN1/IGHV3-30/IGHV3-7/B4GALT1/IGHV4-59/IGHV3-23/IGHV3-11/IG…	110
GO:0044000	BP	GO:0044000	movement in host	92/5405	183/18903	4.43646e-10	1.04785e-08	6.60978e-09	EPHA2/FCN3/CHMP3/ITGAV/DAG1/HYAL2/PLSCR1/ITGA2/SNX3/CAV2/CAV1/CTSL/GSN/IFITM2/IFITM1/IFITM3/CD81/ITGB1/NRP1/ITGA5/EFNB2/GAS6/INSR/LDLR/PVR/NECTIN2/HMGB1/LGALS9/CHMP5/SCARB1/PPIA/VAMP8/CXCR4/ICAM1/CD46/F11R/CHMP2A/SCARB2/FURIN/LAMP1/BSG/TRIM8/UVRAG/TRIM5/LGALS1/DYNLT1/CHMP6/KPNA3/WWP1/CTSB/TRIM25/DDB1/EXOC7/ITGB7/VPS4A/XPR1/CBL/SELPLG/CHMP1A/TSG101/VAPA/LY6E/IST1/RAB7A/ITGB5/FUCA2/HSPA1B/RPSA/SIVA…	92
GO:0051348	BP	GO:0051348	negative regulation of transferase activity	127/5405	276/18903	4.71874e-10	1.11045e-08	7.00469e-09	PTPRC/SH3BP5/HYAL2/HEG1/WWTR1/SPRY1/SPRY4/PRKAR1B/HSPB1/CAV1/SFRP1/FABP4/PLEC/GNAQ/DAB2IP/ABL1/HIPK3/LRP5/THY1/HHEX/LRP6/PTPRB/SH2B3/LATS2/NR2F2/PIP4K2B/PKIG/RASIP1/PPM1F/ADARB1/SFRP2/SPRED1/DUSP7/YWHAG/AIDA/PPIA/PPARG/CDKN1C/PKN1/ITGB1BP1/PPP2R5A/AKT1/MLLT1/TNFAIP3/MIDN/GSK3A/TP53/APC/RGS2/SOCS5/SNCA/TSC2/DUSP3/IPO5/CHMP6/IRAK3/PRKAR1A/DEPTOR/PARK7/MVP/PRKAR2A/PRDX3/VPS25/BAG5/PTEN/IPO7/CBL/RB1/…	127
GO:1903320	BP	GO:1903320	regulation of protein modification by small protein conjugation or removal	118/5405	252/18903	5.20061e-10	1.2194e-08	7.69192e-09	PINK1/PRKCE/EPAS1/CTNNB1/FAM107A/SOX4/SASH1/CAV1/ABL1/ARRB1/ZMIZ1/NXN/FKBP1A/PTTG1IP/DCUN1D3/SVBP/TSPO/PRICKLE1/PPIA/HIF1A/WBP1L/SPHK1/HSP90AA1/PEF1/AKT1/TNFAIP3/SAE1/TRIM44/BIRC3/PDCD6/PIAS3/GSK3A/HERPUD1/PSMD10/HMG20B/LAPTM5/COPS8/COPS9/RBX1/MTA1/TRIP12/VPS28/AIMP2/PARK7/COPS7A/HMG20A/COPS6/COPS5/ARRDC3/OTUD4/BAG5/RASSF5/WFS1/TAF1/PTEN/NMI/KDM1A/PIN1/CENPX/CDK5/PTPN22/RNF40/COMMD1/HUWE1/CHP1/GP…	118
GO:0022900	BP	GO:0022900	electron transport chain	89/5405	176/18903	5.78015e-10	1.35038e-08	8.51811e-09	PINK1/NDUFC1/STEAP4/LOXL2/ASPH/PLEC/NDUFA8/NOX4/NDUFA12/CYBA/CYB5A/COX7A1/NDUFB2/CIAPIN1/COX6C/SLC25A13/NDUFB1/COX5B/UQCRQ/NCF1/COX4I2/UQCR11/NDUFC2/NDUFB6/NDUFS2/SNCA/NDUFS4/POLG2/ETFRF1/MYBBP1A/NDUFB3/PARK7/NDUFB4/DNAJC15/NDUFAB1/CYB561/SDHD/SDHAF2/PDIA5/NDUFA4/UQCC3/NDUFS6/NDUFB10/COQ9/ADH5/NQO2/ETFB/NDUFA10/SDHC/NDUFB7/DEGS1/NDUFB5/IDH3B/NDUFB8/COX6A1/NDUFA1/ETFA/AKR7A2/NDUFA7/NDUFS8/NDUFB9/N…	89
GO:0016197	BP	GO:0016197	endosomal transport	116/5405	247/18903	5.8245e-10	1.35318e-08	8.53583e-09	VAMP3/TINAGL1/LEPROT/RAB13/CHMP3/ANKRD50/SNX3/LAPTM4B/DENND5A/PICALM/RASSF9/DCLK1/EHD4/RAB11A/MVB12A/EHD2/DCTN1/CHMP5/SNX7/ALS2CL/CHMP2A/ERC1/MICALL1/ARFRP1/EEA1/SNX12/EHD3/STX12/RAB11FIP3/SNX33/CLTC/ITSN1/LAMTOR1/VPS35L/WAS/ZFYVE9/TMEM50B/SGSM2/RAB11B/TMEM50A/SPAG9/TBC1D5/ARHGAP1/RAB6A/CHMP6/RAB14/VPS28/VPS37C/SNX1/RILP/VPS52/TBC1D10B/UBXN6/VPS25/VPS4A/HGS/ARL1/STX16/STX6/VPS37A/SNX17/ACAP2/TBC1…	116
GO:0006457	BP	GO:0006457	protein folding	107/5405	223/18903	5.83414e-10	1.35318e-08	8.53583e-09	DFFA/CRTAP/PPIC/GRPEL2/FKBP9/HSPB1/ARL2/FKBP10/GRN/TBCD/FKBP1A/CDC37/P3H1/PPIA/DNAJC10/HSP90AA1/PFDN1/UNC45A/NUDCD3/CLU/PPIB/WDR83OS/PEX5/DNAJC18/PDCD5/PFDN4/CANX/HSPB6/NKTR/NUDCD2/PFDN2/BAG3/CALR/TRAP1/DNAJB4/KHSRP/PDIA3/CCT7/BAG5/WFS1/MKKS/PDIA5/RUVBL2/DNAJA4/CCT5/DNAJC19/CSNK2A1/SDF2/SNRNP70/CCT2/TTC1/HSP90B1/TOR1A/CCDC47/MPDU1/CCT6A/DNAJC5/ATF6/CWC27/TBCA/MESD/SELENOF/PDIA6/CCT3/HSPA1B/DNAJC7…	107
GO:2000404	BP	GO:2000404	regulation of T cell migration	35/5405	49/18903	6.29523e-10	1.4549e-08	9.17742e-09	ABL2/RHOA/CD200/APOD/ABL1/CXCL12/CORO1A/CRK/SPNS2/APP/LRCH1/CD99L2/ADAM10/CCL5/SELENOK/ADAM17/ITGA4/WNK1/DOCK8/ADAM8/AIF1/CCL21/SPN/CCL20/CCR6/XCL2/XCL1/RIPOR2/CD200R1/TNFSF14/CXCL13/OXSR1/TNFRSF14/PYCARD/IL27RA	35
GO:0046777	BP	GO:0046777	protein autophosphorylation	108/5405	226/18903	6.52473e-10	1.50255e-08	9.47803e-09	PINK1/PTPRC/EPHA4/STK25/KDR/VEGFC/FLT4/EPHB4/CAV1/BMX/FGFR1/PTK2/TEK/NTRK2/ENG/ABL1/TNKS1BP1/MAP3K11/PDGFD/THY1/GRK5/FLT1/PEAK1/FES/TAOK2/MAPK3/ACE/MAP3K3/DAPK3/INSR/PDGFB/RAP2A/ATP13A2/PIM2/PRKACA/STK17B/SLK/CAMKK2/MAP3K12/NLK/CALM1/TAOK1/MINK1/PRKD2/IGF1R/AKT1/MEX3B/PDGFRB/PPP2R5B/MAP3K13/TRIM28/PIM3/EEF2K/IRAK3/STK4/MVP/IMPACT/EIF2S1/TAF1/EIF2AK2/LCK/EIF2AK4/SIK2/MTOR/CDK5/STK11/TRIM24/CHP1/PA…	108
GO:0002444	BP	GO:0002444	myeloid leukocyte mediated immunity	61/5405	107/18903	7.00322e-10	1.607e-08	1.01369e-08	S100A13/GATA2/STXBP1/PTGDS/FES/ACE/BCR/RAC2/LGALS9/SNAP23/DNASE1L3/TRAF3IP2/VAMP8/ITGB2/DDX1/IL4R/HLA-E/MAVS/ADAM17/IL6/STXBP2/TYROBP/CBL/CCL3/NR4A3/WDR1/STX4/SPI1/FCGR2B/SNX4/JAGN1/TUSC2/LAT/DDX21/SYK/LAT2/CD300A/FCGR3A/TREM1/CD84/PTAFR/IGHG1/BTK/STAP1/FCGR1A/RASGRP1/SERPINB9/PIK3CD/ADGRE2/UNC13D/BLK/PIK3CG/C3/LYN/ITGAM/KIT/HMOX1/RABGEF1/FGR/SPON2/KMT2E	61
GO:0051701	BP	GO:0051701	biological process involved in interaction with host	99/5405	203/18903	8.38764e-10	1.91786e-08	1.20977e-08	EPHA2/FCN3/CHMP3/INHBB/ITGAV/DAG1/HYAL2/PLSCR1/ITGA2/SNX3/CAV2/CAV1/CTSL/GSN/IFITM2/IFITM1/IFITM3/CD81/ITGB1/NRP1/ITGA5/EFNB2/GAS6/INSR/LDLR/PVR/NECTIN2/HMGB1/LGALS9/CHMP5/SCARB1/PPIA/VAMP8/CXCR4/ICAM1/CD46/F11R/CHMP2A/SCARB2/FURIN/LAMP1/BSG/TRIM8/IFIT1/UVRAG/TRIM5/LGALS1/DDX39B/DYNLT1/CHMP6/KPNA3/WWP1/CTSB/TRIM25/DDB1/EXOC7/ITGB7/VPS4A/XPR1/CBL/SELPLG/THOC7/CHMP1A/BCL2L1/TSG101/VAPA/ALYREF/LY6E/…	99
GO:0071887	BP	GO:0071887	leukocyte apoptotic process	65/5405	117/18903	8.57468e-10	1.95369e-08	1.23238e-08	DFFA/EFNA1/ITPKB/MEF2C/GIMAP8/CTSL/CXCL12/KITLG/GAS6/LGALS9/PLEKHO2/SLC39A10/TRAF3IP2/HIF1A/PKN1/PRKD2/AKT1/FOXP1/TP53/CD27/CCL5/RAPGEF2/KDELR1/ADAM17/IL6/LMBR1L/PTEN/KIFAP3/ANXA1/BCL2L1/CD3G/DOCK8/IL7R/HCLS1/BAX/TSC22D3/ADAM8/PRELID1/BCL10/CCL21/LILRB1/CCR7/BTK/PDCD1/RPS6/IRS2/BCL11B/CDKN2A/BCL2/PIK3CD/IL2RA/FASLG/BLK/MIAT/PRKCQ/IL10/HCAR2/BCL2L11/LYN/ORMDL3/FNIP1/FAS/ARG2/BAK1/IRF7	65
GO:2001242	BP	GO:2001242	regulation of intrinsic apoptotic signaling pathway	87/5405	172/18903	8.83351e-10	2.00558e-08	1.26511e-08	PINK1/ACKR3/BOK/MSX1/HSPB1/FIS1/CAV1/MYC/NACC2/CD44/CXCL12/YBX3/BDKRB2/SNAI1/PTTG1IP/SFRP2/SNAI2/BCAP31/PPIA/HIF1A/SERINC3/HDAC1/AKT1/CLU/HERPUD1/TP53/NCK1/BAD/TXNDC12/BECN1/SLC9A3R1/TRIAP1/ARHGEF2/PARK7/TRAP1/GRINA/BCL2L2/BAG5/WFS1/PTPMT1/LCK/KDM1A/HTRA2/DNM1L/BCL2L1/XBP1/IVNS1ABP/BAX/HNRNPK/NONO/RPS7/NDUFS3/FBH1/NDUFA13/EIF5A/PMAIP1/HYOU1/S100A9/PPIF/RPL26/TREM2/BCL2/UBB/S100A8/SOD2/EIF2AK3/TMB…	87
GO:0051235	BP	GO:0051235	maintenance of location	150/5405	342/18903	9.36551e-10	2.11891e-08	1.3366e-08	PINK1/SELENON/PTPRC/PRKCE/TMSB10/ITGAV/F2R/DBN1/MDFI/SUN1/CD36/PLOD3/CAV1/CLIC2/GSN/ABL1/APLNR/ARL2/P2RY6/THY1/FBN1/PML/CORO1A/CX3CL1/CYBA/FKBP1A/PLCG1/F2RL3/LTBP1/CACNA1C/PRKACA/TSPO/SCARB1/PPARG/ACACB/CIAPIN1/PLA2G4C/HK1/ITPR3/PKD2/FLNA/CALM1/ARL2BP/AKT1/DGAT1/SRGN/PSMD10/UVRAG/TWF1/STAT5B/CPT1A/ARHGAP21/SNCA/NRIP1/SRI/ABCG1/FTO/YWHAB/CHD7/KEAP1/KDELR1/IL6/GOPC/GSTO1/CALR/PKD1/PARK7/TXN/LIME1/C…	150
GO:0046209	BP	GO:0046209	nitric oxide metabolic process	50/5405	82/18903	9.78916e-10	2.20701e-08	1.39217e-08	CD34/ROCK2/EDN1/DDAH2/RAC1/CD36/CAV1/NOS3/KLF4/ASS1/NQO1/INSR/CYB5R3/CYP1B1/TSPO/SPR/ATP2B4/TLR4/PKD2/KLF2/HSP90AA1/AKT1/SMAD3/CLU/DDAH1/ASL/KHSRP/ACP5/CYB5B/AIF1/TNF/HBB/IL1B/PTK2B/IFNG/GLA/TLR2/SOD2/IL10/GCHFR/P2RX4/CLEC7A/PTX3/ZC3H12A/ARG2/HSP90AB1/PTGS2/GCH1/RORA/CD47	50
GO:0032271	BP	GO:0032271	regulation of protein polymerization	98/5405	201/18903	1.03641e-09	2.3285e-08	1.4688e-08	PINK1/CAMSAP2/PRKCE/SPTBN1/TMSB10/NCKAP1/RHOA/ADD1/MAP1B/DBN1/RAC1/ELN/DMTN/GSN/SPTAN1/ABL1/ARL2/CDC42EP2/CTTN/RDX/ESAM/SVIL/ARHGEF7/CYFIP1/SPTBN5/TMOD2/TMOD3/FES/CORO1A/CDH5/GIT1/CSF3/CDC42EP4/TBCD/KANK3/CDC42EP5/CDC42EP1/TRIOBP/DCTN1/SSH1/HIP1R/STMN1/EPS8/KIRREL1/CAPZA2/MET/HSP90AA1/NUMA1/MTPN/TWF1/ARPC1A/NCK1/SNCA/ARPC1B/TPPP3/CDC42EP3/PLEKHG2/FLII/ARPC5L/ADD3/MKKS/MTOR/CAPG/RASA1/BAIAP2/ARHGA…	98
GO:2001236	BP	GO:2001236	regulation of extrinsic apoptotic signaling pathway	80/5405	155/18903	1.22498e-09	2.74259e-08	1.73002e-08	LMNA/PEA15/PTPRC/ITGA6/ITGAV/HYAL2/TNFSF10/CTNNA1/SERPINE1/CAV1/NOS3/SRPX/FGFR1/SFRP1/CTTN/NRP1/UNC5B/ITPRIP/TCF7L2/LTBR/THBS1/PML/CX3CL1/TIMP3/SFRP2/STK3/SNAI2/ICAM1/AKT1/TNFAIP3/ITM2C/ZMYND11/TNFSF12/STK4/PPP2R1A/ARHGEF2/DEPTOR/PARK7/PDIA3/IFI6/PPP2R1B/PRDX2/PTEN/HTRA2/BCL2L1/TMBIM1/STX4/EYA3/RBCK1/PAK2/PSME3/BCL10/TNF/RELA/HSPA1B/TRAF1/IL1B/PMAIP1/TMC8/BCL2/IL1A/INHBA/SIAH2/MCL1/CYLD/MAL/SCG2/…	80
GO:0051403	BP	GO:0051403	stress-activated MAPK cascade	112/5405	239/18903	1.34109e-09	2.99217e-08	1.88744e-08	PINK1/SEMA4C/MAP4K4/SH3RF3/STK25/MECOM/FLT4/TPD52L1/SASH1/EZR/NOD1/MID1/SFRP1/MYC/DAB2IP/SH2D3C/HIPK3/MAP3K11/DIXDC1/LTBR/HACD3/TAOK2/MAPK3/CRK/MAP3K3/PLCB1/CDC42EP5/MAPK11/APP/SFRP2/STK3/HMGB1/LGALS9/RAP2A/PRDX1/PRMT1/AIDA/PPIA/RELL1/MAP3K12/SPHK1/TLR4/TAOK1/MINK1/IGF1R/SMAD3/HRAS/ZMYND11/NCF1/FOXO1/MAP3K20/CD27/MAP3K13/KLHDC10/IGFBP6/DUSP3/ZFP36L1/NBR1/COPS5/MAPK14/EIF2AK2/PTPN22/BMP2/DUSP22/SP…	112
GO:0009145	BP	GO:0009145	purine nucleoside triphosphate biosynthetic process	65/5405	118/18903	1.37812e-09	3.06418e-08	1.93287e-08	PINK1/NDUFC1/NDUFA8/NDUFA12/NME4/NME2/ATP5PF/NDUFB2/NME1/ATP5F1E/SLC25A13/NME3/NDUFB1/ATP5F1C/NDUFC2/NDUFB6/NDUFS2/NDUFS4/NDUFA11/ATP5ME/NDUFB3/ATP5MC1/NDUFB4/ATP5PD/ATP5PO/NDUFAB1/SDHD/UQCC3/NDUFS6/NDUFB10/NDUFA10/SDHC/NDUFB7/NDUFB5/NDUFB8/ATP6V1A/VCP/NDUFA1/NDUFA7/NDUFS8/NDUFB9/NDUFS5/NDUFS3/NDUFA3/STOML2/NDUFA2/NDUFA13/NDUFA6/IMPDH1/IMPDH2/NDUFA9/ATP5F1B/ATP5PB/NUDT2/ATP5F1D/NDUFV3/NDUFS7/ATP5…	65
GO:0009060	BP	GO:0009060	aerobic respiration	95/5405	194/18903	1.39054e-09	3.08117e-08	1.94359e-08	PINK1/RHOA/NDUFC1/NDUFA8/ARL2/ME3/NDUFA12/COX7A1/ATP5PF/HIF1A/NDUFB2/COX6C/ATP5F1E/NDUFB1/COX5B/ATP5F1C/UQCRQ/COX4I2/UQCR11/NDUFC2/NDUFB6/NDUFS2/SNCA/ACO1/NDUFS4/NDUFA11/ATP5ME/NDUFB3/PARK7/NDUFB4/ATP5PD/DNAJC15/ATP5PO/NDUFAB1/SDHD/SDHAF2/NDUFA4/UQCC2/UQCC3/NDUFS6/NDUFB10/PDHB/MTFR1L/COQ9/CAT/CS/NDUFA10/DLST/SDHC/NDUFB7/NDUFB5/IDH3B/NDUFB8/VCP/COX6A1/BLOC1S1/NDUFA1/NDUFA7/NDUFS8/NDUFB9/NDUFS5/NDU…	95
GO:0030593	BP	GO:0030593	neutrophil chemotaxis	60/5405	106/18903	1.41339e-09	3.12108e-08	1.96876e-08	ITGA9/EDN1/RAC1/JAM3/CX3CL1/CCL2/CCL14/CCL23/PIP5K1C/RAC2/LBP/PPIA/ITGA1/ITGB2/BSG/PPIB/CCL4/CCL5/C1QBP/PDE4B/PREX1/DNM1L/CCL3/FCER1G/NCKAP1L/CCL21/SYK/CXCL11/JAML/IL1B/TREM1/VAV1/CCL20/CCR7/CCL3L1/S100A9/C3AR1/C5AR1/CXCL2/XCL2/PIK3CD/XCL1/RIPOR2/S100A8/CXADR/CXCL8/PIK3CG/IL23A/CSF3R/CXCL13/CXCL5/S100A12/CCL18/CCL24/CXCL1/SRP54/CXCL3/CKLF/SAA1/CCL11	60
GO:0001885	BP	GO:0001885	endothelial cell development	42/5405	65/18903	1.68887e-09	3.71667e-08	2.34446e-08	CLIC4/ROCK2/HEG1/ADD1/NOTCH4/EZR/AFDN/PLOD3/MSN/STC1/COL15A1/PDE2A/RDX/ROBO4/VCL/TNFRSF1A/RAPGEF3/TJP1/CDH5/PECAM1/PLCB1/SOX18/CLDN5/COL18A1/EDNRB/ICAM1/F11R/MET/VEZF1/RAPGEF2/GSTM3/TNF/RAP1A/IL1B/RAPGEF1/PPP1R16B/VEGFA/CLDN3/FOXP3/HPSE/PDE4D/RAP2C	42
GO:2001057	BP	GO:2001057	reactive nitrogen species metabolic process	50/5405	83/18903	1.77953e-09	3.90287e-08	2.46191e-08	CD34/ROCK2/EDN1/DDAH2/RAC1/CD36/CAV1/NOS3/KLF4/ASS1/NQO1/INSR/CYB5R3/CYP1B1/TSPO/SPR/ATP2B4/TLR4/PKD2/KLF2/HSP90AA1/AKT1/SMAD3/CLU/DDAH1/ASL/KHSRP/ACP5/CYB5B/AIF1/TNF/HBB/IL1B/PTK2B/IFNG/GLA/TLR2/SOD2/IL10/GCHFR/P2RX4/CLEC7A/PTX3/ZC3H12A/ARG2/HSP90AB1/PTGS2/GCH1/RORA/CD47	50
GO:0031663	BP	GO:0031663	lipopolysaccharide-mediated signaling pathway	41/5405	63/18903	1.91509e-09	4.18594e-08	2.64047e-08	PRKCE/SASH1/CD36/NOS3/MAPK3/CX3CL1/CCL2/CARD8/LBP/SCARB1/TLR4/AKT1/TNFAIP3/TRIM5/SIGIRR/CCL5/CARD16/MAPK14/PRDX2/CCL3/PTPN22/SPI1/CD6/BCL10/MTDH/TNF/IL1B/LY96/IL18/PTAFR/TRIB1/LY86/HCK/TLR2/SCIMP/LYN/CD55/CD14/RIPK2/MALT1/NFKBIA	41
GO:0002262	BP	GO:0002262	myeloid cell homeostasis	85/5405	169/18903	1.95903e-09	4.26752e-08	2.69193e-08	TAL1/TGFBR3/ITPKB/EPAS1/GATA2/SMAD5/ADGRF5/DMTN/ETS1/JAM3/KITLG/SH2B3/TMOD3/HMGB1/FAM210B/PRDX1/PRMT1/TRAF3IP2/HIF1A/TMEM14C/ACVR2A/KLF2/SRF/PRKDC/THRA/STAT5B/ADAM17/IL6/ZBTB7A/PDE4B/STAT3/ZFP36L1/IKZF1/HOXA5/MAPK14/BAP1/RB1/ANXA1/CEBPG/NCSTN/SPI1/ADAR/HCLS1/BAX/NCKAP1L/RPS24/RPS17/HSPA1B/ISG15/ATP5IF1/GATA3/BTK/MAFB/RPS6/RPS19/PIK3CD/HAMP/VEGFA/RHEX/INHBA/FOXP3/CITED2/HCAR2/BCL2L11/LYN/HSPA1A/CD…	85
GO:0050777	BP	GO:0050777	negative regulation of immune response	93/5405	190/18903	2.1239e-09	4.61107e-08	2.90864e-08	PTPRC/HLX/PLK2/IL33/CD59/SERPING1/A2M/CRK/GRN/YES1/PLCG1/BCR/IFI16/LGALS9/SAMSN1/PPARG/STAT6/CD46/BANF1/FURIN/MICA/TNFAIP3/AHR/RC3H2/SOCS5/IL4R/HLA-E/OAS3/IRAK3/METTL3/MAPK14/SAMHD1/NMI/ANXA1/PARP14/DUSP22/SPI1/FCGR2B/ADAR/IL7R/YTHDF2/FAM3A/CD96/NCKAP1L/PSMB4/PTPN6/NDFIP1/ARRB2/SYK/CNOT7/COL3A1/ISG15/PSMA1/TRIM27/CD300A/LILRB1/KLRD1/CD84/HAVCR2/FYN/LILRB4/SLAMF1/PDCD1/CTLA4/HCK/VSIG4/RPS19/TREM2/…	93
GO:0001909	BP	GO:0001909	leukocyte mediated cytotoxicity	71/5405	134/18903	2.38004e-09	5.13262e-08	3.23763e-08	PTPRC/EMP2/CORO1A/CRK/PVR/NECTIN2/LGALS9/PRDX1/DNASE1L3/TUBB/ICAM1/TAP2/MICA/LAMP1/STAT5B/PLEKHM2/HLA-E/CD2/NKG7/STXBP2/SLAMF7/CTSH/TYROBP/HLA-DRA/HPRT1/CEBPG/SPI1/FCGR2B/IL7R/GZMB/KIF5B/NCKAP1L/PTPN6/GZMM/TUSC2/PRF1/ARRB2/KLRB1/FCGR3A/LILRB1/TREM1/VAV1/IL18/KLRD1/HAVCR2/SH2D1A/IGHG1/IL12RB1/STAP1/FCGR1A/CRTAM/RASGRP1/SERPINB9/SLAMF6/XCL1/UNC13D/CD226/LAG3/KLRC1/IL23A/NCR3/KLRC3/LYST/KIR2DL4/CADM…	71
GO:0009142	BP	GO:0009142	nucleoside triphosphate biosynthetic process	71/5405	134/18903	2.38004e-09	5.13262e-08	3.23763e-08	PINK1/UCK2/NDUFC1/NDUFA8/AK1/NDUFA12/NME4/NME2/ATP5PF/NDUFB2/NME1/ATP5F1E/SLC25A13/NME3/NDUFB1/ATP5F1C/NDUFC2/NDUFB6/NDUFS2/NDUFS4/NDUFA11/ATP5ME/NDUFB3/DTYMK/ATP5MC1/NDUFB4/ATP5PD/ATP5PO/AK3/NDUFAB1/SDHD/UQCC3/NDUFS6/NDUFB10/UCKL1/NDUFA10/SDHC/NDUFB7/NDUFB5/NDUFB8/ATP6V1A/VCP/NDUFA1/NDUFA7/NDUFS8/NDUFB9/NDUFS5/NDUFS3/NDUFA3/STOML2/NDUFA2/NDUFA13/NDUFA6/IMPDH1/IMPDH2/NDUFA9/ATP5F1B/ATP5PB/NUDT2/A…	71
GO:0009259	BP	GO:0009259	ribonucleotide metabolic process	192/5405	466/18903	2.45179e-09	5.26972e-08	3.32411e-08	EPHA2/CDA/PINK1/ELOVL1/NPR1/UCK2/GUK1/SULT1C4/RHOA/ZBTB20/NDUFC1/PPT2/NUDT3/NT5E/PDE10A/UPP1/PDK4/FIS1/GIMAP7/NDUFA8/AK1/SLC25A25/ARL2/PDE2A/NDUFA12/ADCY4/PDE8A/NME4/GIT1/NME2/INSR/APP/PDE9A/ACLY/ATP5PF/TSPO/HIF1A/ACACB/NDUFB2/PNP/HSD17B12/ACAT1/HK1/NME1/ADCY6/ATP5F1E/SLC25A13/TPST1/GUCY1B1/PDE7B/AK2/NME3/NDUFB1/PFKM/NUDT7/DGAT1/ATP5F1C/ELOVL7/ACOT7/FOXK1/SLC26A2/JMJD8/NUDT9/NDUFC2/ACSL5/NDUFB6/N…	192
GO:0030198	BP	GO:0030198	extracellular matrix organization	140/5405	318/18903	2.4945e-09	5.3437e-08	3.37078e-08	VWA1/TIE1/ADAM15/ADAMTS4/LAMC1/HMCN1/NID1/PXDN/FAP/FBLN2/CRTAP/KIF9/LAMB2/DAG1/ADAMTS9/PHLDB2/TLL1/ADAMTS6/FOXC1/FLOT1/TNXB/FSCN1/ELN/PLOD3/LAMB1/CAV2/CAV1/BMP1/LOXL2/MATN2/ADAMTSL1/COL15A1/OLFML2A/ENG/ABL1/ADAMTSL2/NOTCH1/LTBP3/SERPINH1/PHLDB1/ITGB1/COL13A1/TNFRSF1A/COL4A1/COL4A2/GAS6/MMP14/NID2/FLRT2/MYO1E/ANXA2/ADAMTS7/MMP2/MMP15/GFOD2/ADAMTS18/MMP28/FKBP10/RAMP2/CST3/SULF2/COLGALT1/APP/ADAMTS…	140
GO:0019693	BP	GO:0019693	ribose phosphate metabolic process	195/5405	475/18903	2.60232e-09	5.55622e-08	3.50484e-08	EPHA2/CDA/PINK1/ELOVL1/NPR1/UCK2/GUK1/SULT1C4/RHOA/ZBTB20/NDUFC1/PPT2/NUDT3/NT5E/PDE10A/UPP1/PDK4/FIS1/GIMAP7/NDUFA8/AK1/SLC25A25/ARL2/PDE2A/NDUFA12/ADCY4/NUDT14/PDE8A/NME4/GIT1/NME2/INSR/APP/PDE9A/ACLY/ATP5PF/TSPO/HIF1A/ACACB/NDUFB2/PNP/PRPSAP1/HSD17B12/ACAT1/HK1/NME1/ADCY6/ATP5F1E/SLC25A13/TPST1/GUCY1B1/PDE7B/AK2/NME3/NDUFB1/PFKM/NUDT7/DGAT1/ATP5F1C/ELOVL7/ACOT7/FOXK1/SLC26A2/JMJD8/NUDT9/NDUFC2…	195
GO:0033077	BP	GO:0033077	T cell differentiation in thymus	51/5405	86/18903	2.65868e-09	5.64049e-08	3.558e-08	PTPRC/ITPKB/CTNNB1/ABL1/ZEB1/JAG2/SOS1/CD3E/SRF/PRKDC/TP53/STAT5B/CD3D/IL2RG/ADAM17/ZFP36L1/EGR3/CLPTM1/STK11/CD3G/ZFP36L2/IL7R/DOCK2/ADAM8/ZAP70/IL1B/CD28/CAMK4/GATA3/CCR7/TOX/MAFB/RPS6/CCR6/BCL11B/RASGRP1/BCL2/TNFRSF9/IL1A/CARD11/TESPA1/FOXP3/ZBTB1/PRR7/B2M/PTPN2/SOD1/RIPK2/BRAF/CDK6/JMJD6	51
GO:0070301	BP	GO:0070301	cellular response to hydrogen peroxide	54/5405	93/18903	2.65929e-09	5.64049e-08	3.558e-08	PINK1/RHOB/STK25/EDN1/AQP1/ABL1/IL18BP/PDGFD/PLEKHA1/PDE8A/NQO1/PCGF2/MAP1LC3A/CYP1B1/NET1/SPHK1/STAT6/MET/ZNF580/KLF2/TNFAIP3/FOXP1/HDAC2/PRKAA1/BECN1/IL6/PARK7/TRAP1/TXN/IMPACT/APEX1/ANXA1/NR4A3/SETX/CAT/HSF1/SIGMAR1/PDCD10/DDR2/RELA/FYN/PRKCD/PPIF/STK26/ERN1/IL10/TRPA1/FABP1/MAPK13/NFE2L2/OSER1/KDM6B/MAP3K5/EZH2	54
GO:0009206	BP	GO:0009206	purine ribonucleoside triphosphate biosynthetic process	64/5405	117/18903	2.68877e-09	5.68433e-08	3.58565e-08	PINK1/NDUFC1/NDUFA8/NDUFA12/NME4/NME2/ATP5PF/NDUFB2/NME1/ATP5F1E/SLC25A13/NME3/NDUFB1/ATP5F1C/NDUFC2/NDUFB6/NDUFS2/NDUFS4/NDUFA11/ATP5ME/NDUFB3/ATP5MC1/NDUFB4/ATP5PD/ATP5PO/NDUFAB1/SDHD/UQCC3/NDUFS6/NDUFB10/NDUFA10/SDHC/NDUFB7/NDUFB5/NDUFB8/ATP6V1A/VCP/NDUFA1/NDUFA7/NDUFS8/NDUFB9/NDUFS5/NDUFS3/NDUFA3/STOML2/NDUFA2/NDUFA13/NDUFA6/IMPDH1/IMPDH2/NDUFA9/ATP5F1B/ATP5PB/NUDT2/ATP5F1D/NDUFV3/NDUFS7/ATP5…	64
GO:0022904	BP	GO:0022904	respiratory electron transport chain	66/5405	122/18903	2.81082e-09	5.92294e-08	3.73616e-08	PINK1/NDUFC1/PLEC/NDUFA8/NDUFA12/COX7A1/NDUFB2/COX6C/SLC25A13/NDUFB1/COX5B/UQCRQ/COX4I2/UQCR11/NDUFC2/NDUFB6/NDUFS2/SNCA/NDUFS4/POLG2/ETFRF1/MYBBP1A/NDUFB3/PARK7/NDUFB4/DNAJC15/NDUFAB1/SDHD/SDHAF2/NDUFA4/UQCC3/NDUFS6/NDUFB10/COQ9/ETFB/NDUFA10/SDHC/NDUFB7/NDUFB5/NDUFB8/COX6A1/NDUFA1/ETFA/NDUFA7/NDUFS8/NDUFB9/NDUFS5/PUM2/NDUFS3/COX7A2L/NDUFA3/NDUFA2/NDUFA6/COX7A2/NDUFA9/COX7B/COX5A/NDUFV3/COX4I1/ND…	66
GO:0034250	BP	GO:0034250	positive regulation of cellular amide metabolic process	85/5405	170/18903	2.82604e-09	5.9356e-08	3.74415e-08	PINK1/EFNA1/ROCK2/EPHA4/RHOA/ITGA2/SOX4/PICALM/VIM/YBX3/THBS1/SAMD4A/CYP1B1/CSNK1E/CTIF/COA3/LARP6/PAIP1/PLXNB2/CLU/PRKDC/GSK3A/IFNGR1/CDC123/EIF4G1/NCK1/UPF3A/SYNCRIP/ABCG1/CCL5/C1QBP/LARP1/DHX29/POLR2G/IL6/METTL3/HNRNPD/SP1/METTL5/IMPACT/NGRN/UQCC2/EIF2AK4/MRPS27/MTOR/HABP4/HNRNPL/EIF6/DHX9/ELAVL1/SERP1/MPV17L2/YTHDF2/YBX1/KHDRBS1/TNF/RELA/LARP4/FXR1/EIF5A/RPL5/SH3BGRL/CSDE1/PTK2B/CD28/PTAFR/EE…	85
GO:0016049	BP	GO:0016049	cell growth	201/5405	493/18903	2.89505e-09	6.06081e-08	3.82313e-08	CLSTN1/CDA/MACF1/SEMA6C/NPR1/ADAM15/RTN4/SEMA4C/BMPR2/NRP2/IGFBP5/VGLL4/TGFBR2/CTNNB1/LAMB2/RHOA/SEMA3F/HYAL1/HYAL2/SEMA3G/FAM107A/MSX1/IGFBP7/PDLIM5/SORBS2/DAB2/MAP1B/SEMA6A/HBEGF/DBN1/SCGB3A1/NRN1/EDN1/PI16/GJA1/SGK1/IGFBP3/FHL1/DPYSL2/SFRP1/SOX17/ABL1/OLFM1/CCDC85B/CTTN/EI24/ITGB1/NRP1/CXCL12/VCL/CLSTN3/ACVRL1/RARG/SOCS2/DCLK1/MMP14/KIF26A/CYFIP1/PML/TAOK2/BCAR1/CYBA/IGFBP4/PPP1R9B/SEMA6B/APP/…	201
GO:0032388	BP	GO:0032388	positive regulation of intracellular transport	96/5405	199/18903	3.08551e-09	6.43863e-08	4.06145e-08	PINK1/LEPROT/OAZ3/HYAL2/DAB2/ABLIM3/TMEM30A/EZR/FIS1/MSN/STOM/CD81/RDX/TCF7L2/RAPGEF3/GAS6/NEDD4/ANXA2/OAZ2/RIPOR1/YWHAE/MYO1C/JUP/EHD2/RAC2/PRKACA/BCAP31/ITGB1BP1/TCAF1/FLNA/HSP90AA1/ITGB2/NUMA1/SMAD3/SAE1/SCP2/RHOU/HRAS/SH3GLB1/GSK3A/MTMR2/PDCD5/TARDBP/DYNC1H1/PRKAA1/OAZ1/TRIM28/IPO5/CSNK2A2/MAVS/BAG3/UBL5/MAPK14/CAMK1/BAP1/HTRA2/CDK5/SNAPIN/STK11/RAB29/HUWE1/CHP1/DHX9/PTPN23/TPR/HCLS1/TBC1D20/…	96
GO:0002431	BP	GO:0002431	Fc receptor mediated stimulatory signaling pathway	26/5405	33/18903	3.17272e-09	6.59925e-08	4.16278e-08	PTPRC/PRKCE/PLSCR1/PTK2/ABL1/YES1/PLD2/APPL1/NR4A3/FCER1G/FCGR2B/MYO1G/SYK/VAV1/FYN/PRKCD/HCK/PAK1/BLK/CD226/LYN/PTPRJ/CSK/RABGEF1/FGR/CD47	26
GO:0043062	BP	GO:0043062	extracellular structure organization	140/5405	319/18903	3.20354e-09	6.64194e-08	4.1897e-08	VWA1/TIE1/ADAM15/ADAMTS4/LAMC1/HMCN1/NID1/PXDN/FAP/FBLN2/CRTAP/KIF9/LAMB2/DAG1/ADAMTS9/PHLDB2/TLL1/ADAMTS6/FOXC1/FLOT1/TNXB/FSCN1/ELN/PLOD3/LAMB1/CAV2/CAV1/BMP1/LOXL2/MATN2/ADAMTSL1/COL15A1/OLFML2A/ENG/ABL1/ADAMTSL2/NOTCH1/LTBP3/SERPINH1/PHLDB1/ITGB1/COL13A1/TNFRSF1A/COL4A1/COL4A2/GAS6/MMP14/NID2/FLRT2/MYO1E/ANXA2/ADAMTS7/MMP2/MMP15/GFOD2/ADAMTS18/MMP28/FKBP10/RAMP2/CST3/SULF2/COLGALT1/APP/ADAMTS…	140
GO:0009260	BP	GO:0009260	ribonucleotide biosynthetic process	109/5405	234/18903	3.38041e-09	6.98618e-08	4.40685e-08	CDA/PINK1/ELOVL1/NPR1/UCK2/NDUFC1/PPT2/UPP1/PDK4/NDUFA8/AK1/NDUFA12/ADCY4/NME4/NME2/ACLY/ATP5PF/ACACB/NDUFB2/HSD17B12/ACAT1/NME1/ADCY6/ATP5F1E/SLC25A13/GUCY1B1/AK2/NME3/NDUFB1/ATP5F1C/ELOVL7/ACOT7/SLC26A2/NDUFC2/ACSL5/NDUFB6/NDUFS2/RFK/GUCY1A1/SNCA/NDUFS4/NDUFA11/ATP5ME/NDUFB3/ATP5MC1/PDK2/NDUFB4/ATP5PD/ATP5PO/AK3/NDUFAB1/GART/SDHD/UQCC3/NDUFS6/NDUFB10/PDHB/HPRT1/UCKL1/NDUFA10/SDHC/NDUFB7/PANK3/N…	109
GO:0006120	BP	GO:0006120	mitochondrial electron transport, NADH to ubiquinone	35/5405	51/18903	3.51045e-09	7.23176e-08	4.56176e-08	PINK1/NDUFC1/NDUFA8/NDUFB2/NDUFB1/NDUFC2/NDUFB6/NDUFS2/SNCA/NDUFS4/NDUFB3/PARK7/NDUFB4/DNAJC15/NDUFAB1/NDUFA4/NDUFS6/NDUFB10/COQ9/NDUFA10/NDUFB7/NDUFB5/NDUFB8/NDUFA1/NDUFA7/NDUFS8/NDUFB9/NDUFS5/NDUFS3/NDUFA3/NDUFA2/NDUFA6/NDUFA9/NDUFV3/NDUFS7	35
GO:0030833	BP	GO:0030833	regulation of actin filament polymerization	73/5405	140/18903	3.59083e-09	7.37378e-08	4.65135e-08	PRKCE/SPTBN1/TMSB10/NCKAP1/RHOA/ADD1/DBN1/ELN/DMTN/GSN/SPTAN1/CDC42EP2/CTTN/RDX/ESAM/SVIL/CYFIP1/SPTBN5/TMOD2/TMOD3/CORO1A/CSF3/CDC42EP4/KANK3/CDC42EP5/CDC42EP1/TRIOBP/SSH1/HIP1R/EPS8/KIRREL1/CAPZA2/MTPN/TWF1/ARPC1A/NCK1/ARPC1B/CDC42EP3/PLEKHG2/FLII/ARPC5L/ADD3/MKKS/MTOR/CAPG/RASA1/BAIAP2/ARHGAP18/HCLS1/ARPC4/NCKAP1L/TWF2/MLST8/CCL21/CYFIP2/FCHSD2/ARPC5/VASP/EVL/PTK2B/CCR7/PRKCD/HCK/COTL1/CCL24/G…	73
GO:0002275	BP	GO:0002275	myeloid cell activation involved in immune response	55/5405	96/18903	3.72767e-09	7.63049e-08	4.81328e-08	S100A13/PRKCE/DYSF/GATA2/IL33/STXBP1/PTGDS/FES/GRN/BCR/RAC2/LBP/LGALS9/SNAP23/DNASE1L3/VAMP8/SBNO2/ITGB2/IL4R/STXBP2/TYROBP/NMI/CBL/CCL3/NR4A3/FCER1G/STX4/SPI1/DOCK2/SNX4/PTPN6/LAT/SYK/LAT2/CD300A/CD84/HAVCR2/PTAFR/BTK/SLAMF1/IFNG/RASGRP1/TREM2/PIK3CD/ADGRE2/UNC13D/BLK/PIK3CG/LYN/ITGAM/KIT/HMOX1/RABGEF1/FGR/PYCARD	55
GO:1905897	BP	GO:1905897	regulation of response to endoplasmic reticulum stress	49/5405	82/18903	3.79229e-09	7.73819e-08	4.88122e-08	BOK/CAV1/DAB2IP/BCAP31/ATXN3/SERINC3/CLU/HERPUD1/NCK1/USP13/TXNDC12/BAG6/TMEM259/PARK7/GRINA/COPS5/ATF6B/WFS1/BFAR/BCL2L1/XBP1/SVIP/PIGBOS1/FCGR2B/SGTA/DDRGK1/BAX/ATF6/ALOX5/AGR2/PMAIP1/DNAJB9/HYOU1/ERN1/EIF2AK3/TMBIM6/BCL2L11/NUPR1/PTPN1/PPP1R15B/HSPA1A/NFE2L2/DDIT3/PTPN2/PPP1R15A/HSPA5/BAK1/ERP29/PIK3R1	49
GO:0031294	BP	GO:0031294	lymphocyte costimulation	33/5405	47/18903	3.96581e-09	8.06674e-08	5.08846e-08	CAV1/EFNB1/CD81/EFNB2/YES1/CD320/PIK3CA/CD3E/AKT1/LGALS1/PTPN11/LCK/PTPN6/CCL21/CD86/VAV1/CD5/ICOS/CD28/CCR7/FYN/LILRB4/LILRB2/CARD11/CD24/TMIGD2/CD40LG/TNFSF14/LYN/CSK/TNFRSF14/TNFSF13B/MAP3K8	33
GO:0051090	BP	GO:0051090	regulation of DNA-binding transcription factor activity	187/5405	454/18903	4.06009e-09	8.23253e-08	5.19304e-08	PINK1/ID3/PLPP3/CTNNB1/CD200/HES1/CYTL1/EDN1/FLOT1/MDFI/SGK1/NOD1/SFRP4/CD36/CAV1/PPP2CB/FZD6/KLF4/DAB2IP/LRP5/ARRB1/FZD4/TCF7L2/LRP6/GAS6/SAV1/MAPK3/CX3CL1/CSF3/JUP/ID1/CD40/CARD8/APP/STK3/LGALS9/CYP1B1/PPIA/PPARG/PRKCH/EGLN1/SPHK1/TLR4/PKD2/FLNA/CTNNBIP1/PPP3CA/ERC1/GLIS2/PRKD2/LAMTOR5/AKT1/SMAD3/TNFAIP3/CLU/PPP2R5B/SRF/SLCO3A1/TRIM8/MTPN/FLOT2/PSMD10/TRIM5/DHX33/SIGIRR/CLOCK/PURA/HDAC2/MAP3K13…	187
GO:0046635	BP	GO:0046635	positive regulation of alpha-beta T cell activation	45/5405	73/18903	4.08857e-09	8.2643e-08	5.21308e-08	PTPRC/HLX/ITPKB/TGFBR2/RHOA/CD81/ZBTB16/LGALS9/PNP/CD3E/SOCS5/IL4R/IL2RG/HLA-E/RUNX3/ANXA1/HLA-DRA/PTPN22/SASH3/NCKAP1L/ZAP70/SOCS1/SYK/CD86/IL18/CD83/CD28/LILRB4/IFNG/HSPH1/IL12RB1/NFKBID/NLRP3/XCL1/CARD11/PRKCQ/IL23A/FOXP3/EBI3/RUNX1/RASAL3/CD55/RIPK2/MALT1/NFKBIZ	45
GO:0031295	BP	GO:0031295	T cell costimulation	32/5405	45/18903	4.12498e-09	8.31184e-08	5.24307e-08	CAV1/EFNB1/CD81/EFNB2/YES1/PIK3CA/CD3E/AKT1/LGALS1/PTPN11/LCK/PTPN6/CCL21/CD86/VAV1/CD5/ICOS/CD28/CCR7/FYN/LILRB4/LILRB2/CARD11/CD24/TMIGD2/CD40LG/TNFSF14/LYN/CSK/TNFRSF14/TNFSF13B/MAP3K8	32
GO:0042773	BP	GO:0042773	ATP synthesis coupled electron transport	57/5405	101/18903	4.20244e-09	8.41532e-08	5.30835e-08	PINK1/NDUFC1/NDUFA8/NDUFA12/COX7A1/NDUFB2/COX6C/NDUFB1/COX5B/UQCRQ/COX4I2/UQCR11/NDUFC2/NDUFB6/NDUFS2/SNCA/NDUFS4/NDUFB3/PARK7/NDUFB4/DNAJC15/NDUFAB1/SDHD/SDHAF2/NDUFA4/UQCC3/NDUFS6/NDUFB10/COQ9/NDUFA10/SDHC/NDUFB7/NDUFB5/NDUFB8/COX6A1/NDUFA1/NDUFA7/NDUFS8/NDUFB9/NDUFS5/NDUFS3/COX7A2L/NDUFA3/NDUFA2/NDUFA6/COX7A2/NDUFA9/COX7B/COX5A/NDUFV3/COX4I1/NDUFS7/COX6B1/CYCS/COX8A/UQCRB/UQCRFS1	57
GO:0042775	BP	GO:0042775	mitochondrial ATP synthesis coupled electron transport	57/5405	101/18903	4.20244e-09	8.41532e-08	5.30835e-08	PINK1/NDUFC1/NDUFA8/NDUFA12/COX7A1/NDUFB2/COX6C/NDUFB1/COX5B/UQCRQ/COX4I2/UQCR11/NDUFC2/NDUFB6/NDUFS2/SNCA/NDUFS4/NDUFB3/PARK7/NDUFB4/DNAJC15/NDUFAB1/SDHD/SDHAF2/NDUFA4/UQCC3/NDUFS6/NDUFB10/COQ9/NDUFA10/SDHC/NDUFB7/NDUFB5/NDUFB8/COX6A1/NDUFA1/NDUFA7/NDUFS8/NDUFB9/NDUFS5/NDUFS3/COX7A2L/NDUFA3/NDUFA2/NDUFA6/COX7A2/NDUFA9/COX7B/COX5A/NDUFV3/COX4I1/NDUFS7/COX6B1/CYCS/COX8A/UQCRB/UQCRFS1	57
GO:0009201	BP	GO:0009201	ribonucleoside triphosphate biosynthetic process	66/5405	123/18903	4.37879e-09	8.74132e-08	5.51398e-08	PINK1/UCK2/NDUFC1/NDUFA8/NDUFA12/NME4/NME2/ATP5PF/NDUFB2/NME1/ATP5F1E/SLC25A13/NME3/NDUFB1/ATP5F1C/NDUFC2/NDUFB6/NDUFS2/NDUFS4/NDUFA11/ATP5ME/NDUFB3/ATP5MC1/NDUFB4/ATP5PD/ATP5PO/NDUFAB1/SDHD/UQCC3/NDUFS6/NDUFB10/UCKL1/NDUFA10/SDHC/NDUFB7/NDUFB5/NDUFB8/ATP6V1A/VCP/NDUFA1/NDUFA7/NDUFS8/NDUFB9/NDUFS5/NDUFS3/NDUFA3/STOML2/NDUFA2/NDUFA13/NDUFA6/IMPDH1/IMPDH2/NDUFA9/ATP5F1B/ATP5PB/NUDT2/ATP5F1D/NDUFV3/…	66
GO:0046629	BP	GO:0046629	gamma-delta T cell activation	22/5405	26/18903	4.43295e-09	8.82212e-08	5.56495e-08	PTPRC/SOX13/LEF1/SOX4/JAG2/CD3E/MICA/STAT5B/EGR3/CD247/CD3G/NCKAP1L/SYK/ITK/JAML/LILRB1/GPR18/CXADR/KLRC1/TRDC/TRGC2/TCF7	22
GO:0070371	BP	GO:0070371	ERK1 and ERK2 cascade	147/5405	340/18903	4.45571e-09	8.84014e-08	5.57632e-08	EPHA2/SHC1/PTPRC/ITGAV/EPHA4/ACKR3/GNAI2/KDR/SPRY1/DAB2/F2R/SEMA6A/SPRY4/FLT4/EDN1/CNKSR3/EZR/NOD1/BMPER/RAMP3/GRB10/CD36/MYC/TEK/DAB2IP/ABL1/NOTCH1/CAVIN3/CD44/P2RY6/ARRB1/NOX4/PDGFD/NRP1/LMO3/DUSP6/GAS6/FERMT2/PDE8A/MAPK3/CX3CL1/CCL2/CCL14/CCL23/RRAS/TIMP3/PDGFB/APP/AKAP12/HMGB1/LGALS9/SPRED1/DUSP7/SPRED2/ITGB1BP1/ICAM1/SYNJ2BP/MAP3K12/TLR4/NDRG2/PRKD2/TPBG/PDGFRB/GBP1/HRAS/CCL4/GPR183/TRAF7/PT…	147
GO:0045860	BP	GO:0045860	positive regulation of protein kinase activity	175/5405	420/18903	4.65985e-09	9.21679e-08	5.81391e-08	PINK1/EFNA1/PTPRC/RALB/BMPR2/EPHA4/TGFBR2/RHOA/DAG1/ROBO1/VEGFC/MEF2C/HBEGF/EDN1/TPD52L1/SASH1/TNFRSF10B/FGFR1/TCIM/PTK2/DAB2IP/ABL1/MOB2/MAP3K11/CCND1/FZD4/NOX4/PDGFD/KITLG/FLT1/GAS6/FERMT2/THBS1/EMP2/GPRC5B/TAOK2/ACE/CD40/INSR/CARD10/PDGFB/STK3/NEDD9/ATP2B4/CCNY/PPIA/ITGB1BP1/CAMKK2/MAP3K12/TLR4/PIK3CA/PKD2/CALM1/TAOK1/HSP90AA1/SLC27A1/AKT1/CLU/PDGFRB/HRAS/PSMD10/NCF1/COPS8/DLG4/MAP3K13/SNCA/CC…	175
GO:0061077	BP	GO:0061077	chaperone-mediated protein folding	44/5405	71/18903	4.79144e-09	9.44807e-08	5.9598e-08	DFFA/CRTAP/HSPB1/FKBP1A/P3H1/UNC45A/CLU/PPIB/DNAJC18/PDCD5/HSPB6/TRAP1/DNAJB4/CCT7/CCT5/CSNK2A1/SDF2/CCT2/TOR1A/CCT6A/DNAJC5/CCT3/HSPA1B/DNAJC7/DNAJB1/BAG1/ST13/HSPE1/HSPA8/FKBP11/HSPH1/FKBP4/HSPA13/HSPA1A/HSPA6/ERO1A/CHORDC1/DNAJB6/FKBP2/HSPA9/SDF2L1/HSPA5/PTGES3/PDCL3	44
GO:0009895	BP	GO:0009895	negative regulation of catabolic process	144/5405	332/18903	4.95695e-09	9.74464e-08	6.14687e-08	DFFA/PINK1/LEPR/FEZ2/SNX3/LAPTM4B/DAB2IP/YBX3/ANXA2/PML/NQO1/GABARAPL2/GIT1/TIMP2/CST3/RASIP1/TIMP3/ATP13A2/TSPO/ATP2B4/TRAF3IP2/OPHN1/ACACB/TENT5C/RRAGA/TIMP1/PIK3CA/FLNA/MET/PAIP1/FURIN/AKT1/SMAD3/IL10RA/GIPC1/SNX12/SLC7A5/GSK3A/FOXK1/MTMR2/TP53/EIF4G1/SLIRP/SYNCRIP/SNCA/TSC2/TIMP4/TARDBP/PRKAA1/BECN1/BAG6/LARP1/CSNK2A2/SF3B3/HP/HERC1/IRAK3/HNRNPD/PARK7/STAT3/EHMT2/DAP/RILP/EIF4G2/ZCCHC17/MAPK1…	144
GO:0033108	BP	GO:0033108	mitochondrial respiratory chain complex assembly	56/5405	99/18903	5.11438e-09	1.00236e-07	6.32281e-08	NDUFC1/NDUFA8/NDUFA12/DMAC1/NDUFB2/COA3/NDUFB1/TMEM223/COX16/NDUFC2/NDUFB6/NDUFS2/NDUFS4/SAMM50/NDUFAF2/NDUFA11/COX14/COA5/NDUFB3/COA4/NDUFB4/NDUFAF3/BCS1L/NDUFAB1/ACAD9/SDHAF2/TIMM21/UQCC2/UQCC3/NDUFB10/SMIM4/TMEM126B/TTC19/NDUFA10/COX17/NDUFB7/NDUFB5/NDUFB8/NDUFAF4/STMP1/DMAC2/PET100/NDUFA1/NDUFS8/NDUFB9/NDUFS5/NDUFS3/NDUFA3/NDUFA2/NDUFA13/NDUFA6/NDUFA9/NDUFS7/UQCRFS1/SLC25A33/CHCHD7	56
GO:0045229	BP	GO:0045229	external encapsulating structure organization	140/5405	321/18903	5.2452e-09	1.02488e-07	6.4649e-08	VWA1/TIE1/ADAM15/ADAMTS4/LAMC1/HMCN1/NID1/PXDN/FAP/FBLN2/CRTAP/KIF9/LAMB2/DAG1/ADAMTS9/PHLDB2/TLL1/ADAMTS6/FOXC1/FLOT1/TNXB/FSCN1/ELN/PLOD3/LAMB1/CAV2/CAV1/BMP1/LOXL2/MATN2/ADAMTSL1/COL15A1/OLFML2A/ENG/ABL1/ADAMTSL2/NOTCH1/LTBP3/SERPINH1/PHLDB1/ITGB1/COL13A1/TNFRSF1A/COL4A1/COL4A2/GAS6/MMP14/NID2/FLRT2/MYO1E/ANXA2/ADAMTS7/MMP2/MMP15/GFOD2/ADAMTS18/MMP28/FKBP10/RAMP2/CST3/SULF2/COLGALT1/APP/ADAMTS…	140
GO:0002695	BP	GO:0002695	negative regulation of leukocyte activation	95/5405	198/18903	5.28193e-09	1.02894e-07	6.4905e-08	PTPRC/HLX/CD200/ADGRF5/SFRP1/LRRC32/CX3CL1/GRN/ZBTB46/LDLR/BCR/HMGB1/LGALS9/SAMSN1/PKN1/MICA/TNFAIP3/RC3H2/LAPTM5/CST7/TWSG1/SOCS5/IL4R/DUSP3/PRKAR1A/RUNX3/RASSF5/PRDX2/NRARP/PTEN/TYROBP/ANXA1/TBC1D10C/PTPN22/RHBDD3/DUSP22/SPI1/FCGR2B/NR1D1/GAL/NCKAP1L/PTPN6/NDFIP1/SOCS1/VSIR/TIGIT/SPN/CD86/LST1/CD300A/LILRB1/HMGB3/CD84/HAVCR2/LAX1/BTK/LILRB4/TNFRSF13B/PAG1/CTLA4/LILRB2/VSIG4/CBLB/CRTAM/IL2RA/MND…	95
GO:0045637	BP	GO:0045637	regulation of myeloid cell differentiation	101/5405	214/18903	5.31917e-09	1.03307e-07	6.51657e-08	TAL1/ITPKB/CTNNB1/GATA2/LEF1/MEF2C/DLL1/HOXA7/SFRP1/MYC/ZBTB16/ETS1/RARG/KITLG/FBN1/FES/CSF3/JAG1/ZBTB46/NEDD9/FAM210B/MEIS2/KLF10/PRMT1/HIF1A/LRRC17/TLR4/CTNNBIP1/PPP3CA/ACVR2A/GABPA/EVI2B/PRKDC/PIAS3/FOXP1/STAT5B/FOS/STAT3/ZFP36L1/HOXA5/PURB/GPR137/MAPK14/TFE3/TYROBP/RB1/CCL3/CUL4A/LOX/MTOR/HSF1/SPI1/CREB1/EIF6/HCLS1/NCKAP1L/NDFIP1/RASSF2/TNF/HSPA1B/ISG15/LILRB1/HMGB3/PTK2B/CAMK4/TRIB1/CD4/LILR…	101
GO:0046390	BP	GO:0046390	ribose phosphate biosynthetic process	111/5405	241/18903	5.38256e-09	1.04224e-07	6.57443e-08	CDA/PINK1/ELOVL1/NPR1/UCK2/NDUFC1/PPT2/UPP1/PDK4/NDUFA8/AK1/NDUFA12/ADCY4/NME4/NME2/ACLY/ATP5PF/ACACB/NDUFB2/PRPSAP1/HSD17B12/ACAT1/NME1/ADCY6/ATP5F1E/SLC25A13/GUCY1B1/AK2/NME3/NDUFB1/ATP5F1C/ELOVL7/ACOT7/SLC26A2/NDUFC2/ACSL5/NDUFB6/NDUFS2/RFK/GUCY1A1/SNCA/NDUFS4/NDUFA11/ATP5ME/NDUFB3/ATP5MC1/PDK2/NDUFB4/ATP5PD/ATP5PO/AK3/NDUFAB1/GART/SDHD/UQCC3/NDUFS6/NDUFB10/PDHB/HPRT1/UCKL1/NDUFA10/SDHC/NDUFB7…	111
GO:0002260	BP	GO:0002260	lymphocyte homeostasis	43/5405	69/18903	5.59764e-09	1.08065e-07	6.81666e-08	MEF2C/ABL1/CORO1A/SPNS2/LGALS9/TRAF3IP2/HIF1A/PKN1/SOS1/AKT1/TNFAIP3/RC3H2/STAT5B/TNFRSF17/PRDX2/SLC39A3/SASH3/IL7R/CAMLG/BAX/TSC22D3/NCKAP1L/BCL10/LAT/SLC40A1/DOCK10/SIT1/PMAIP1/TNFRSF13B/RPS6/GPR174/BCL2/IL2RA/FOXP3/LGALS2/BCL2L11/TNFSF14/SKIL/LYN/FAS/DOCK11/TNFSF13B/BAK1	43
GO:0033157	BP	GO:0033157	regulation of intracellular protein transport	105/5405	225/18903	5.75656e-09	1.10801e-07	6.98927e-08	PINK1/LEPROT/OAZ3/PTPN14/HYAL2/APOD/ABLIM3/TMEM30A/CD36/FIS1/DMTN/STOM/CD81/TCF7L2/RAPGEF3/GAS6/IFI27/OAZ2/RIPOR1/YWHAE/MYO1C/JUP/PKIG/RAC2/ATP13A2/PRKACA/BCAP31/LCP1/ITGB1BP1/TCAF1/FLNA/HSP90AA1/ITGB2/SMAD3/SAE1/RHOU/HRAS/UBE2G2/SH3GLB1/GSK3A/DERL3/PDCD5/TARDBP/PTPN11/PRKAA1/OAZ1/TRIM28/IPO5/CSNK2A2/MAVS/BAG3/UBL5/PARK7/TXN/MAPK14/CAMK1/SUMO1/BAP1/HTRA2/CDK5/INPP5K/OS9/RAB29/SVIP/GDI1/HUWE1/CHP1…	105
GO:0050730	BP	GO:0050730	regulation of peptidyl-tyrosine phosphorylation	120/5405	266/18903	6.03467e-09	1.15727e-07	7.30001e-08	PLPP3/SHC1/EFNA1/PTPRC/PRKCE/EPHA4/SH3BP5/HYAL2/HES1/IL6ST/HBEGF/CD36/CAV1/DMTN/SFRP1/ENPP2/ABL1/CD81/CD44/NOX4/PDGFD/THY1/NRP1/TNFRSF1A/ITGA5/KITLG/SH2B3/GAS6/EHD4/GPRC5B/CSF3/ACE/PECAM1/SOCS3/YES1/CD40/PDGFB/APP/SFRP2/NEDD9/SAMSN1/ARL2BP/CD3E/ITGB2/TNK2/PPP2R5B/NCF1/TP53/DLG4/HDAC2/SOCS5/PTPN11/CCL5/AREG/CHMP6/ADAM17/IL6/PPP2R1A/ARHGEF2/MVP/VPS25/PARP9/IL15/CBL/TNFRSF18/PARP14/MTOR/TSG101/DUSP2…	120
GO:0042116	BP	GO:0042116	macrophage activation	60/5405	109/18903	6.06634e-09	1.15727e-07	7.30001e-08	PTPRC/PRKCE/DYSF/CD200/ADGRF5/IL33/THBS1/CX3CL1/GRN/CD93/LDLR/APP/LBP/SPHK1/TLR4/SBNO2/ITGB2/CLU/IFNGR1/FOXP1/CST7/IL4R/SNCA/IL6/TNIP2/TYROBP/NMI/CCL3/IFNGR2/MYO18A/FCGR2B/NR1D1/AIF1/TNF/SYK/HSPD1/PJA2/FCGR3A/CD84/HAVCR2/C1QA/IFNG/C5AR1/VSIG4/STAP1/TREM2/HAMP/TLR2/SLC11A1/IL10/GPR137B/IL1RL1/ITGAM/JUND/ZC3H12A/JUN/CTSC/RORA/ATM/JMJD6	60
GO:1903557	BP	GO:1903557	positive regulation of tumor necrosis factor superfamily cytokine production	60/5405	109/18903	6.06634e-09	1.15727e-07	7.30001e-08	PTPRC/ZBTB20/NOD1/HSPB1/CD36/IL33/THBS1/CYBA/APP/LBP/AKAP12/HMGB1/LGALS9/TLR4/CLU/FRMD8/IFNGR1/HDAC2/PTPN11/OAS2/HLA-E/SELENOK/MAVS/OAS3/CD2/IL6/ARHGEF2/STAT3/TYROBP/CCL3/DHX9/SASH3/ADAM8/BCL10/SYK/LPL/CYBB/DDT/SPN/CD86/FCGR3A/LY96/CD84/HAVCR2/PTAFR/BTK/IFNG/RASGRP1/TLR2/LILRA5/IL1A/IL23A/ARID5A/CLEC7A/CD14/PTPRJ/RIPK2/SPON2/PYCARD/PIK3R1	60
GO:0030041	BP	GO:0030041	actin filament polymerization	84/5405	170/18903	7.14623e-09	1.35926e-07	8.57414e-08	PRKCE/SPTBN1/TMSB10/NCKAP1/RHOA/FAM107A/ADD1/DBN1/RAC1/ELN/WASL/DIAPH2/DMTN/GSN/SPTAN1/ABL1/CDC42EP2/CTTN/RDX/ESAM/SVIL/CYFIP1/SPTBN5/TMOD2/TMOD3/CORO1A/CSF3/CDC42EP4/KANK3/CDC42EP5/CDC42EP1/TRIOBP/SSH1/HIP1R/EPS8/KIRREL1/CAPZA2/MTPN/TWF1/WAS/ARPC1A/NCK1/ARPC1B/CDC42EP3/PLEKHG2/FLII/MSRB2/ARPC5L/PREX1/ADD3/MKKS/MTOR/CAPG/RASA1/BAIAP2/ARHGAP18/HCLS1/ARPC4/NCKAP1L/TWF2/MLST8/AIF1/CCL21/CYFIP2/FCHSD…	84
GO:0002285	BP	GO:0002285	lymphocyte activation involved in immune response	98/5405	207/18903	7.30428e-09	1.38524e-07	8.738e-08	PTPRC/HLX/LEF1/DLL1/ITM2A/ABL1/CD81/SWAP70/NKX2-3/CORO1A/CD40/HMGB1/LGALS9/LCP1/MFNG/ICAM1/STAT6/TLR4/CD46/LAMP1/FOXP1/TP53/RC3H2/LGALS1/PHF14/SOCS5/IL4R/GPR183/UNG/IL6/NKG7/POU2AF1/STAT3/IRF4/EIF2AK4/ANXA1/APBB1IP/MTOR/HLA-DRA/FCER1G/XBP1/EXOSC6/SPI1/FCGR2B/LY9/NCKAP1L/NDFIP1/ITGAL/HSPD1/PTGER4/SPN/CD86/DOCK10/FCGR3A/LILRB1/BATF/IL18/PTK2B/HAVCR2/CD28/GATA3/IFNG/CD19/IL12RB1/RPS6/CCR6/IRF8/NFKBI…	98
GO:1903900	BP	GO:1903900	regulation of viral life cycle	73/5405	142/18903	7.98064e-09	1.50525e-07	9.49502e-08	FCN3/NR5A2/PLSCR1/SNX3/GSN/NOTCH1/IFITM2/IFITM1/IFITM3/HACD3/NECTIN2/ADARB1/IFI16/HMGB1/LGALS9/PPIA/ISG20/BANF1/FURIN/ZNFX1/TRIM8/IFIT1/TRIM5/LGALS1/PKN2/CCL5/OAS2/TRIM28/LARP1/KPNA6/MAVS/OAS3/TRIM25/DDB1/VPS4A/VAPB/BST2/RAD23A/EIF2AK2/STAU1/INPP5K/TSG101/SRPK2/ADAR/LY6E/TNF/MPHOSPH8/CNOT7/ISG15/APOBEC3G/TRIM27/CD28/CD4/APOBEC3C/TRIM22/BCL2/MX1/FCN1/APOBEC3H/ZC3HAV1/CXCL8/OASL/VPS37B/TMPRSS4/SLPI…	73
GO:0043367	BP	GO:0043367	CD4-positive, alpha-beta T cell differentiation	51/5405	88/18903	7.98378e-09	1.50525e-07	9.49502e-08	HLX/LEF1/CTSL/NKX2-3/HMGB1/LGALS9/STAT6/FOXP1/RC3H2/SOCS5/IL4R/GPR183/IL2RG/IL6/STAT3/RUNX3/ARMC5/IRF4/ANXA1/MTOR/HLA-DRA/SASH3/LY9/NCKAP1L/SOCS1/PTGER4/SPN/CD86/BATF/IL18/CD83/GATA3/TOX/IFNG/IL12RB1/NFKBID/NLRP3/SLAMF6/TBX21/IL23A/FOXP3/RELB/RUNX1/IL6R/ZC3H12A/IL18R1/RIPK2/BRAF/MALT1/NFKBIZ/RORA	51
GO:0002688	BP	GO:0002688	regulation of leukocyte chemotaxis	67/5405	127/18903	8.38348e-09	1.576e-07	9.94131e-08	VEGFC/EDN1/RAC1/SERPINE1/VEGFD/MTUS1/PTK2/SWAP70/JAM3/CXCL12/ANO6/GAS6/PGF/THBS1/MAPK3/CCL2/MMP28/RAC2/LBP/HMGB1/LGALS9/NEDD9/ZNF580/ADAM10/CCL4/CCL5/C1QBP/GPSM3/ADAM17/IL6/CALR/WNK1/DNM1L/CCL3/SPI1/NCKAP1L/AIF1/CCL21/PTN/DDT/RARRES2/PTK2B/CCR7/SLAMF1/CSF1R/C3AR1/C5AR1/CCR6/STAP1/XCL2/XCL1/GPR18/RIPOR2/VEGFA/CXCL8/CCR1/IL23A/TNFSF14/LYN/PLA2G7/CXCL13/OXSR1/CXCL17/IL6R/S100A14/DUSP1/AKIRIN1	67
GO:0071706	BP	GO:0071706	tumor necrosis factor superfamily cytokine production	91/5405	189/18903	8.86012e-09	1.65594e-07	1.04456e-07	PTPRC/CD34/ZBTB20/NOD1/HSPB1/CD36/IL33/GAS6/THBS1/CX3CL1/CYBA/APP/LBP/AKAP12/HMGB1/LGALS9/TSPO/TLR4/TNFAIP3/CLU/FRMD8/IFNGR1/FOXP1/HDAC2/PTPN11/OAS2/HLA-E/SELENOK/MAVS/OAS3/IRAK3/CD2/IL6/ARHGEF2/STAT3/ACP5/TYROBP/DICER1/CCL3/PTPN22/DHX9/SASH3/ADAM8/PTPN6/BCL10/ARRB2/VSIR/SYK/LPL/TRIM27/CYBB/DDT/SPN/CD86/FCGR3A/LILRB1/LY96/CD84/HAVCR2/PTAFR/BTK/LILRB4/SLAMF1/IFNG/RASGRP1/TREM2/TLR2/LILRA5/IL1A/GPR…	91
GO:1903555	BP	GO:1903555	regulation of tumor necrosis factor superfamily cytokine production	91/5405	189/18903	8.86012e-09	1.65594e-07	1.04456e-07	PTPRC/CD34/ZBTB20/NOD1/HSPB1/CD36/IL33/GAS6/THBS1/CX3CL1/CYBA/APP/LBP/AKAP12/HMGB1/LGALS9/TSPO/TLR4/TNFAIP3/CLU/FRMD8/IFNGR1/FOXP1/HDAC2/PTPN11/OAS2/HLA-E/SELENOK/MAVS/OAS3/IRAK3/CD2/IL6/ARHGEF2/STAT3/ACP5/TYROBP/DICER1/CCL3/PTPN22/DHX9/SASH3/ADAM8/PTPN6/BCL10/ARRB2/VSIR/SYK/LPL/TRIM27/CYBB/DDT/SPN/CD86/FCGR3A/LILRB1/LY96/CD84/HAVCR2/PTAFR/BTK/LILRB4/SLAMF1/IFNG/RASGRP1/TREM2/TLR2/LILRA5/IL1A/GPR…	91
GO:0031331	BP	GO:0031331	positive regulation of cellular catabolic process	177/5405	429/18903	9.08192e-09	1.69249e-07	1.06762e-07	PINK1/RNF144A/ROCK2/SH3RF3/RALB/ZBTB20/KDR/SH3D19/DAB2/PLK2/NOD1/CAV1/PTK2/IL33/PIK3C2A/TNKS1BP1/HSPB8/SPTLC2/MAPK3/PIP4K2B/INSR/APP/SH3BP4/SAMD4A/HMGB1/DISC1/CSNK1E/PIM2/BCAP31/CCNY/PRICKLE1/HIF1A/SNX7/NT5C3B/CAMKK2/ZYG11B/PAFAH1B2/SCOC/PAIP1/FURIN/AKT1/CLU/ELOB/TRIM8/SH3GLB1/SNX33/GSK3A/HERPUD1/PSMD10/UVRAG/TRIM5/RC3H2/LAPTM5/FOXO1/CPT1A/SAMD4B/MOV10/PUM1/SOCS5/SYNCRIP/CELF1/BAD/RNF217/RBX1/SNC…	177
GO:0009150	BP	GO:0009150	purine ribonucleotide metabolic process	183/5405	447/18903	1.0223e-08	1.89966e-07	1.1983e-07	EPHA2/PINK1/ELOVL1/NPR1/GUK1/SULT1C4/RHOA/ZBTB20/NDUFC1/PPT2/NUDT3/NT5E/PDE10A/PDK4/FIS1/GIMAP7/NDUFA8/AK1/SLC25A25/ARL2/PDE2A/NDUFA12/ADCY4/PDE8A/NME4/GIT1/NME2/INSR/APP/PDE9A/ACLY/ATP5PF/TSPO/HIF1A/ACACB/NDUFB2/PNP/HSD17B12/ACAT1/HK1/NME1/ADCY6/ATP5F1E/SLC25A13/TPST1/GUCY1B1/PDE7B/AK2/NME3/NDUFB1/PFKM/NUDT7/DGAT1/ATP5F1C/ELOVL7/ACOT7/FOXK1/SLC26A2/JMJD8/NUDT9/NDUFC2/ACSL5/NDUFB6/NDUFS2/BAD/GUCY…	183
GO:0019079	BP	GO:0019079	viral genome replication	68/5405	130/18903	1.02898e-08	1.90658e-07	1.20266e-07	NFIA/NR5A2/NUCKS1/PLSCR1/STOM/NOTCH1/IFITM2/IFITM1/IFITM3/CTBP2/GAS6/IFI27/HACD3/CCL2/ADARB1/IFI16/PPIA/ISG20/PCBP2/BANF1/LAMTOR5/ZNFX1/PPIB/IFIT1/PKN2/CCL5/OAS2/TRIM28/LARP1/KPNA6/MAVS/OAS3/DDB1/VAPB/BST2/RAD23A/EIF2AK2/EIF2AK4/STAU1/INPP5K/SRPK2/ADAR/TBC1D20/VAPA/VCP/TNF/MPHOSPH8/CNOT7/ISG15/APOBEC3G/CXCR6/EEF1A1/CD28/HSPA8/APOBEC3C/BCL2/MX1/APOBEC3H/ZC3HAV1/CXCL8/OASL/SLPI/APOBEC3A/PABPC1/CCNK…	68
GO:0010257	BP	GO:0010257	NADH dehydrogenase complex assembly	38/5405	59/18903	1.14905e-08	2.11688e-07	1.33532e-07	NDUFC1/NDUFA8/NDUFA12/DMAC1/NDUFB2/NDUFB1/NDUFC2/NDUFB6/NDUFS2/NDUFS4/NDUFAF2/NDUFA11/NDUFB3/NDUFB4/NDUFAF3/BCS1L/NDUFAB1/ACAD9/TIMM21/NDUFB10/TMEM126B/NDUFA10/NDUFB7/NDUFB5/NDUFB8/NDUFAF4/DMAC2/NDUFA1/NDUFS8/NDUFB9/NDUFS5/NDUFS3/NDUFA3/NDUFA2/NDUFA13/NDUFA6/NDUFA9/NDUFS7	38
GO:0032981	BP	GO:0032981	mitochondrial respiratory chain complex I assembly	38/5405	59/18903	1.14905e-08	2.11688e-07	1.33532e-07	NDUFC1/NDUFA8/NDUFA12/DMAC1/NDUFB2/NDUFB1/NDUFC2/NDUFB6/NDUFS2/NDUFS4/NDUFAF2/NDUFA11/NDUFB3/NDUFB4/NDUFAF3/BCS1L/NDUFAB1/ACAD9/TIMM21/NDUFB10/TMEM126B/NDUFA10/NDUFB7/NDUFB5/NDUFB8/NDUFAF4/DMAC2/NDUFA1/NDUFS8/NDUFB9/NDUFS5/NDUFS3/NDUFA3/NDUFA2/NDUFA13/NDUFA6/NDUFA9/NDUFS7	38
GO:0002819	BP	GO:0002819	regulation of adaptive immune response	94/5405	198/18903	1.23482e-08	2.26196e-07	1.42683e-07	PTPRC/HLX/IL6ST/MEF2C/IL33/CD81/CD40/PVR/NECTIN2/HMGB1/CD48/SAMSN1/PKN1/TRPM4/STAT6/CD46/TAP2/TNFAIP3/IL1R1/AHR/RC3H2/WAS/SOCS5/IL4R/HLA-E/IL6/EIF2AK4/SKAP1/ANXA1/HLA-DRA/EXOSC6/DUSP22/FCGR2B/SASH3/IL7R/NCKAP1L/PTPN6/NDFIP1/TNF/TRIM27/HSPD1/IL1B/LILRB1/BATF/IL18/KLRD1/HAVCR2/CD28/GATA3/CD4/BTK/LILRB4/SLAMF1/IL12RB1/FCGR1A/DENND1B/TREM2/NFKBID/NLRP3/XCL1/ADCY7/DUSP10/SLC11A1/TBX21/IL4I1/CD226/PRKC…	94
GO:0070302	BP	GO:0070302	regulation of stress-activated protein kinase signaling cascade	94/5405	198/18903	1.23482e-08	2.26196e-07	1.42683e-07	PINK1/SEMA4C/MAP4K4/SH3RF3/STK25/MECOM/FLT4/TPD52L1/SASH1/EZR/NOD1/MID1/SFRP1/MYC/DAB2IP/HIPK3/MAP3K11/DIXDC1/LTBR/TAOK2/MAPK3/CRK/MAP3K3/PLCB1/APP/SFRP2/STK3/HMGB1/RAP2A/PRDX1/PRMT1/AIDA/PPIA/RELL1/SPHK1/TLR4/TAOK1/MINK1/IGF1R/HRAS/ZMYND11/NCF1/FOXO1/CD27/KLHDC10/IGFBP6/DUSP3/NBR1/COPS5/ZMPSTE24/EIF2AK2/PTPN22/BMP2/DUSP22/SPI1/FCGR2B/PDCD10/RNF13/RASSF2/CCL21/TNF/MAP2K2/PJA2/TRAF1/GADD45B/IL1B/P…	94
GO:0006605	BP	GO:0006605	protein targeting	140/5405	325/18903	1.36658e-08	2.49623e-07	1.57461e-07	ICMT/PINK1/LEPROT/ABLIM3/GRPEL2/FIS1/ZDHHC9/DMTN/STOM/RASSF9/SRP14/NEDD4/TAOK2/YWHAE/MYO1C/CDC37/RAC2/ZDHHC3/TSPO/BCAP31/YWHAG/ITGB1BP1/SYNJ2BP/TIMM13/TCAF1/SEC62/MTX2/HSP90AA1/MICALL1/SCARB2/ITGB2/SAE1/GIPC1/CLU/ZDHHC1/TIMM8B/ROMO1/RHOU/HRAS/SH3GLB1/PEX5/GSK3A/HERPUD1/YIF1B/NCF1/ZDHHC24/LAPTM5/PDCD5/TOMM5/PRKAA1/ZDHHC14/SAMM50/BECN1/YWHAB/BAG6/TRAK2/CSNK2A2/BAG3/MON1B/VPS37C/TIMM10/UBL5/TRAM2/SR…	140
GO:0009152	BP	GO:0009152	purine ribonucleotide biosynthetic process	102/5405	220/18903	1.4433e-08	2.62829e-07	1.65791e-07	PINK1/ELOVL1/NPR1/NDUFC1/PPT2/PDK4/NDUFA8/AK1/NDUFA12/ADCY4/NME4/NME2/ACLY/ATP5PF/ACACB/NDUFB2/HSD17B12/ACAT1/NME1/ADCY6/ATP5F1E/SLC25A13/GUCY1B1/AK2/NME3/NDUFB1/ATP5F1C/ELOVL7/ACOT7/SLC26A2/NDUFC2/ACSL5/NDUFB6/NDUFS2/GUCY1A1/SNCA/NDUFS4/NDUFA11/ATP5ME/NDUFB3/ATP5MC1/PDK2/NDUFB4/ATP5PD/ATP5PO/AK3/NDUFAB1/GART/SDHD/UQCC3/NDUFS6/NDUFB10/PDHB/HPRT1/NDUFA10/SDHC/NDUFB7/PANK3/NDUFB5/NDUFB8/PAPSS2/ATP6…	102
GO:0006470	BP	GO:0006470	protein dephosphorylation	117/5405	261/18903	1.44808e-08	2.62829e-07	1.65791e-07	CAMTA1/PINK1/CTTNBP2NL/DUSP23/PTPRC/PTPN14/ROCK2/DUSP2/GNAI2/PTPRG/PTPRK/PTPN12/PTPRN2/DLC1/PPP2CB/PTP4A3/SWAP70/TNS2/CTDSP2/PTPRB/DUSP6/NUAK1/CDH5/YWHAE/PPP1R9B/PTPRM/FKBP1A/PPM1F/RCAN1/SLC39A10/DUSP7/PPIA/SSH1/PPP4R1/BOD1/ITGA1/CDKN3/PTPA/CALM1/PPP3CA/CTDSP1/PPP5C/PPP2R5A/PDGFRB/PPP2R5B/PPM1D/MTMR2/NCK1/GNA12/SPPL3/DUSP14/PTPN11/DUSP3/CDC25B/SYMPK/YWHAB/PTPRA/PPP2R1A/PPP2R2A/CTDNEP1/PTPRE/NSMF/…	117
GO:0006754	BP	GO:0006754	ATP biosynthetic process	58/5405	106/18903	1.4511e-08	2.62829e-07	1.65791e-07	PINK1/NDUFC1/NDUFA8/NDUFA12/ATP5PF/NDUFB2/ATP5F1E/SLC25A13/NDUFB1/ATP5F1C/NDUFC2/NDUFB6/NDUFS2/NDUFS4/NDUFA11/ATP5ME/NDUFB3/ATP5MC1/NDUFB4/ATP5PD/ATP5PO/NDUFAB1/SDHD/UQCC3/NDUFS6/NDUFB10/NDUFA10/SDHC/NDUFB7/NDUFB5/NDUFB8/ATP6V1A/VCP/NDUFA1/NDUFA7/NDUFS8/NDUFB9/NDUFS5/NDUFS3/NDUFA3/STOML2/NDUFA2/NDUFA13/NDUFA6/NDUFA9/ATP5F1B/ATP5PB/NUDT2/ATP5F1D/NDUFV3/NDUFS7/ATP5MC2/ATP5MF/ATP5F1A/TREM2/ATP6V0C/A…	58
GO:0031032	BP	GO:0031032	actomyosin structure organization	96/5405	204/18903	1.51259e-08	2.72948e-07	1.72175e-07	ASAP3/WASF2/CNN3/S1PR1/RHOC/S100A10/CSRP1/CDC42BPA/ROCK2/TACR1/RHOA/PHLDB2/LIMCH1/EPB41L4A/EDN1/RAC1/ELN/DLC1/SORBS3/SFRP1/PLEC/PGM5/ABL1/TNNT3/ARRB1/FAM171A1/ITGB1/NRP1/PDLIM1/RAPGEF3/CSRP2/PXN/FERMT2/CDC42BPB/TJP1/TMOD2/TMOD3/MEF2A/FHOD1/ARHGEF15/MYH10/TNFAIP1/ACTG1/MYL9/PPM1F/MYH9/EPB41L3/TPM1/ITGB1BP1/STMN1/EPB41L2/F11R/MET/SMAD3/PDGFRB/SRF/OBSL1/WAS/ZYX/RGCC/PRKAR1A/FLII/PPFIA1/CFL2/GPR65/FL…	96
GO:0034446	BP	GO:0034446	substrate adhesion-dependent cell spreading	60/5405	111/18903	1.51544e-08	2.72948e-07	1.72175e-07	VAMP3/S100A10/EFNA1/LAMC1/LIMS2/ITGAV/LAMB2/RHOA/DAB2/SPRY4/RAC1/LAMB1/DMTN/PTK2/TEK/ABL1/PARVA/FZD4/NRP1/DOCK1/PXN/ARHGEF7/FERMT2/PEAK1/CRK/LAMA5/ACTN4/TRIOBP/PARVB/NTN4/NEDD9/SRGAP2/ILK/ITGB1BP1/RCC2/FLNA/GBP1/AKIP1/C1QBP/CALR/ATRN/LPXN/PREX1/ITGB7/ITGA4/FERMT3/ITGA8/CORO1C/LIMS1/CDC42/PARVG/FBLN1/UNC13D/DOCK5/LAMB3/CIB1/BRAF/ARPC2/APOA1/PIK3R1	60
GO:0010595	BP	GO:0010595	positive regulation of endothelial cell migration	68/5405	131/18903	1.54469e-08	2.77442e-07	1.75009e-07	PLPP3/AKT3/ROCK2/RHOB/ATOH8/BMPR2/NRP2/GATA2/KDR/VEGFC/PLK2/SPARC/FLT4/EDN1/SASH1/RAC1/HSPB1/NOS3/ADGRA2/FGFR1/TEK/ABL1/PIK3C2A/ETS1/JCAD/NRP1/HDAC7/RHOJ/THBS1/BCAR1/GRN/MAP3K3/RIN2/PLCG1/CD40/FUT1/RRAS/PDGFB/HMGB1/SCARB1/HIF1A/ITGB1BP1/MET/ZNF580/PRKD2/AKT1/PDCD6/FOXP1/ADAM17/CALR/SMOC2/SP1/SRPX2/ANXA1/ATP5F1B/PTK2B/GATA3/ATP5F1A/PIK3CD/VEGFA/PIK3CG/P2RX4/CIB1/MAP2K3/NFE2L2/ZC3H12A/HMOX1/PTGS2	68
GO:0070372	BP	GO:0070372	regulation of ERK1 and ERK2 cascade	136/5405	315/18903	1.85083e-08	3.31503e-07	2.09111e-07	EPHA2/SHC1/PTPRC/EPHA4/ACKR3/GNAI2/KDR/SPRY1/DAB2/F2R/SEMA6A/SPRY4/FLT4/CNKSR3/EZR/NOD1/BMPER/RAMP3/CD36/TEK/DAB2IP/ABL1/NOTCH1/CAVIN3/CD44/P2RY6/ARRB1/NOX4/PDGFD/NRP1/LMO3/DUSP6/GAS6/FERMT2/PDE8A/MAPK3/CX3CL1/CCL2/CCL14/CCL23/RRAS/TIMP3/PDGFB/APP/AKAP12/HMGB1/LGALS9/SPRED1/SPRED2/ITGB1BP1/ICAM1/SYNJ2BP/MAP3K12/TLR4/NDRG2/PRKD2/TPBG/PDGFRB/GBP1/HRAS/CCL4/GPR183/TRAF7/PTPN11/CCL5/DUSP3/RAPGEF2/SLC…	136
GO:0030038	BP	GO:0030038	contractile actin filament bundle assembly	59/5405	109/18903	1.86279e-08	3.31803e-07	2.093e-07	ASAP3/WASF2/S1PR1/RHOC/S100A10/ROCK2/TACR1/RHOA/PHLDB2/LIMCH1/RAC1/ELN/DLC1/SORBS3/SFRP1/ABL1/ARRB1/FAM171A1/NRP1/PDLIM1/RAPGEF3/PXN/FERMT2/TJP1/FHOD1/ARHGEF15/TNFAIP1/ACTG1/PPM1F/TPM1/ITGB1BP1/STMN1/F11R/MET/SMAD3/SRF/WAS/ZYX/RGCC/PPFIA1/GPR65/SORBS1/MKKS/MTOR/INPP5K/PAK2/ITGB5/CDC42/PTGER4/EVL/PTK2B/PAK1/SDC4/PHACTR1/PFN1/BRAF/CD47/APOA1/PIK3R1	59
GO:0043149	BP	GO:0043149	stress fiber assembly	59/5405	109/18903	1.86279e-08	3.31803e-07	2.093e-07	ASAP3/WASF2/S1PR1/RHOC/S100A10/ROCK2/TACR1/RHOA/PHLDB2/LIMCH1/RAC1/ELN/DLC1/SORBS3/SFRP1/ABL1/ARRB1/FAM171A1/NRP1/PDLIM1/RAPGEF3/PXN/FERMT2/TJP1/FHOD1/ARHGEF15/TNFAIP1/ACTG1/PPM1F/TPM1/ITGB1BP1/STMN1/F11R/MET/SMAD3/SRF/WAS/ZYX/RGCC/PPFIA1/GPR65/SORBS1/MKKS/MTOR/INPP5K/PAK2/ITGB5/CDC42/PTGER4/EVL/PTK2B/PAK1/SDC4/PHACTR1/PFN1/BRAF/CD47/APOA1/PIK3R1	59
GO:0071900	BP	GO:0071900	regulation of protein serine/threonine kinase activity	164/5405	395/18903	1.89156e-08	3.36e-07	2.11947e-07	PTPRC/RALB/BMPR2/EPHA4/RHOA/HYAL2/ROBO1/HEG1/SPRY1/DAB2/MEF2C/SPRY4/EDN1/TNXB/TPD52L1/SASH1/PRKAR1B/CAV1/FGFR1/TCIM/SFRP1/DAB2IP/ABL1/HIPK3/MAP3K11/LRP5/CCND1/FZD4/NOX4/PDGFD/THY1/HHEX/LRP6/KITLG/SH2B3/LATS2/FLT1/FERMT2/THBS1/NR2F2/TAOK2/PKIG/CD40/INSR/CDC37/RASIP1/PDGFB/SFRP2/STK3/KSR1/DUSP7/ATP2B4/CCNY/AIDA/PPARG/CDKN1C/SOS1/MAP3K12/CDKN3/TLR4/PKD2/CALM1/TAOK1/SLC27A1/AKT1/TNFAIP3/PDGFRB/HRAS/P…	164
GO:0032609	BP	GO:0032609	interferon-gamma production	63/5405	119/18903	1.93817e-08	3.42392e-07	2.15979e-07	IL33/ABL1/GAS6/CD276/HMGB1/LGALS9/TLR4/CD3E/IL1R1/SLC7A5/HRAS/LAPTM5/C1QBP/CD2/PDE4B/PTPN22/CEBPG/SASH3/CD96/TNF/VSIR/ISG15/TRIM27/HSPD1/IL1B/HLA-DPA1/LILRB1/IL18/HAVCR2/GATA3/CCR7/LILRB4/SLAMF1/IL12RB1/IRF8/CRTAM/HLA-DPB1/RASGRP1/SLAMF6/XCL1/SLC11A1/CD244/INHBA/CD226/IL23A/IL10/FOXP3/TXK/ARID5A/EBI3/LTA/CLEC7A/IL1RL1/CD14/PDE4D/ZC3H12A/DDIT3/IL18R1/PRNP/RIPK2/PYCARD/CD47/IL27RA	63
GO:0032649	BP	GO:0032649	regulation of interferon-gamma production	63/5405	119/18903	1.93817e-08	3.42392e-07	2.15979e-07	IL33/ABL1/GAS6/CD276/HMGB1/LGALS9/TLR4/CD3E/IL1R1/SLC7A5/HRAS/LAPTM5/C1QBP/CD2/PDE4B/PTPN22/CEBPG/SASH3/CD96/TNF/VSIR/ISG15/TRIM27/HSPD1/IL1B/HLA-DPA1/LILRB1/IL18/HAVCR2/GATA3/CCR7/LILRB4/SLAMF1/IL12RB1/IRF8/CRTAM/HLA-DPB1/RASGRP1/SLAMF6/XCL1/SLC11A1/CD244/INHBA/CD226/IL23A/IL10/FOXP3/TXK/ARID5A/EBI3/LTA/CLEC7A/IL1RL1/CD14/PDE4D/ZC3H12A/DDIT3/IL18R1/PRNP/RIPK2/PYCARD/CD47/IL27RA	63
GO:0045428	BP	GO:0045428	regulation of nitric oxide biosynthetic process	39/5405	62/18903	1.96028e-08	3.45352e-07	2.17846e-07	CD34/ROCK2/EDN1/DDAH2/RAC1/CD36/CAV1/KLF4/ASS1/INSR/TSPO/ATP2B4/TLR4/PKD2/KLF2/HSP90AA1/AKT1/SMAD3/CLU/DDAH1/ASL/KHSRP/ACP5/AIF1/TNF/HBB/IL1B/PTK2B/IFNG/GLA/SOD2/IL10/P2RX4/CLEC7A/PTX3/ZC3H12A/HSP90AB1/PTGS2/CD47	39
GO:0033628	BP	GO:0033628	regulation of cell adhesion mediated by integrin	33/5405	49/18903	2.04294e-08	3.58935e-07	2.26414e-07	EPHA2/EFNA1/SERPINE1/PODXL/PTK2/SWAP70/JAM3/PLAU/PIEZO1/CRK/SFRP2/CYP1B1/SNAI2/ITGB1BP1/CD3E/PTPN11/CCL5/LPXN/WNK1/ADAM9/SKAP1/FERMT3/NCKAP1L/PTPN6/CCL21/SYK/PDE3B/PIK3CG/MUC1/FERMT1/LYN/CXCL13/CIB1	33
GO:0038061	BP	GO:0038061	NIK/NF-kappaB signaling	72/5405	142/18903	2.12992e-08	3.73199e-07	2.35412e-07	RHOA/EDN1/SASH1/NOD1/TSPAN6/TNFRSF10B/TCIM/PTP4A3/HDAC7/UACA/ACTN4/CARD10/APP/LGALS9/PRDX1/C1QTNF3/ILK/SPHK1/TLR4/AKT1/TRIM44/BIRC3/RC3H2/LAPTM5/AKIP1/CD27/COPS8/NDUFC2/CALR/LIME1/TNFRSF10A/EIF2AK2/NMI/DICER1/ZFP91/PTPN22/SPI1/RBCK1/PHB2/LIMS1/RASSF2/TNF/RELA/PPP4C/BIRC2/CD86/IL1B/IL18/REL/HAVCR2/TREM2/NLRP3/LITAF/TLR2/IL23A/TERF2IP/CYLD/RELB/TNFSF14/CHI3L1/TNFSF15/CD14/NFKB2/IKBKE/NLRC3/ZC3H12A/…	72
GO:0070098	BP	GO:0070098	chemokine-mediated signaling pathway	51/5405	90/18903	2.25513e-08	3.94067e-07	2.48576e-07	ACKR1/ACKR3/ROBO1/FOXC1/EDN1/CXCL12/SH2B3/CX3CL1/CCL2/CCL14/CCL23/HIF1A/CXCR4/WBP1L/CCL4/CCL5/SLIT3/WNK1/CCL3/CCL21/CXCL11/PTK2B/CCL20/CXCR6/CXCR3/CCR7/CCL3L1/CXCL2/CCR10/CCR6/TREM2/XCL2/TFF2/GPR35/XCL1/CXCL8/CCR5/CCR1/LYN/CXCL13/CXCR5/CIB1/CXCL5/OXSR1/CCL18/CCL24/CXCL1/CXCL3/CCRL2/RNF113A/CCL11	51
[truncated: 2,119 more rows]

## Sheet: Table S6
Supplementary Table 6. Go enrichment analysis in single cell RNA cohorts after ATOH8 silence perturbation.
pathway	pval	padj	log2err	ES	NES	size
GOMF_STRUCTURAL_MOLECULE_ACTIVITY	1.99847e-24	2.05043e-20	1.27903	-0.588679	-2.54267	396
GOCC_EXTERNAL_ENCAPSULATING_STRUCTURE	2.10861e-20	1.08172e-16	1.16907	-0.643941	-2.64808	241
[truncated: 94 more rows]
